# Supplementary material for: The acetylase activity of Cdu1 regulates bacterial exit from infected cells by protecting Chlamydia effectors from degradation
Source: eLife journal article supplement (doi:10.7554/elife.87386), 2023-05-12
Supplement: fig1-figsupp3-data1 [file Figure 1-figure supplement 3-source data 1.xlsx]

## Sheet: Mock_L2 Hs proteins
id	Protein IDs	Protein names	Gene names	Fasta headers	log2 Fold change	-log10p
1480	H3BV68;C9J7I2;B3KT69;F5H7K1;E7EWW0;Q7Z3J2-2;Q7Z3J2;H3BVG8;I3L1U5	UPF0505 protein C16orf62	C16orf62	tr|H3BV68|H3BV68_HUMAN Esophageal cancer associated protein, isoform CRA_a OS=Homo sapiens OX=9606 GN=VPS35L PE=1 SV=1;tr|C9J7I2|C9J7I2_HUMAN VPS35 endosomal protein sorting factor-like OS=Homo sapiens OX=9606 GN=VPS35L PE=1 SV=2;tr|B3KT69|B3KT69_HUMAN cDN	0	0.60206
1109	F2Z2E2;A2RRC9;Q86VI3	Ras GTPase-activating-like protein IQGAP3	IQGAP3	tr|F2Z2E2|F2Z2E2_HUMAN Ras GTPase-activating-like protein IQGAP3 OS=Homo sapiens OX=9606 GN=IQGAP3 PE=1 SV=1;tr|A2RRC9|A2RRC9_HUMAN IQ motif containing GTPase activating protein 3 OS=Homo sapiens OX=9606 GN=IQGAP3 PE=1 SV=1;sp|Q86VI3|IQGA3_HUMAN Ras GTPase	0	0.60206
2734	Q15366-6;Q15366;H3BRU6;B4DRD7;B4DLC0;Q15366-7;Q15366-8;F8W0G4;F8VXH9;F8W1G6;J3QT27;Q5MJP6;E9PFP8;P57721-2;P57721-3;P57721-5;P57721-4;P57721;H3BSS4;F8VTZ0;H3BND9;H3BSP4;C9K0A2;F8WC71;C9IZV9;C9J7A9;C9JSA6;C9J5V4;C9JTY5;C9JZY3;C9J0A4;Q7Z4Y9;A0A024R320;P57723-2;P57723	Poly(rC)-binding protein 2	PCBP2	sp|Q15366-6|PCBP2_HUMAN Isoform 6 of Poly(rC)-binding protein 2 OS=Homo sapiens OX=9606 GN=PCBP2;sp|Q15366|PCBP2_HUMAN Poly(rC)-binding protein 2 OS=Homo sapiens OX=9606 GN=PCBP2 PE=1 SV=1;tr|H3BRU6|H3BRU6_HUMAN Poly(rC)-binding protein 2 (Fragment) OS=Hom	0	0.60206
334	A0A024R705;Q9UN37;I3L4J1;Q49AN7;Q9NXK5;Q9UF30;Q6PIW4-2	Vacuolar protein sorting-associated protein 4A	VPS4A	tr|A0A024R705|A0A024R705_HUMAN Vacuolar protein sorting 4A (Yeast), isoform CRA_c OS=Homo sapiens OX=9606 GN=VPS4A PE=3 SV=1;sp|Q9UN37|VPS4A_HUMAN Vacuolar protein sorting-associated protein 4A OS=Homo sapiens OX=9606 GN=VPS4A PE=1 SV=1;tr|I3L4J1|I3L4J1_HU	0	0.60206
734	T2DQ69;B3KTL4;B3KX23;A0A0A0MSJ0;Q86XP3-2;Q86XP3;B3KMI4;B3KV84	ATP-dependent RNA helicase DDX42	DDX42	tr|T2DQ69|T2DQ69_HUMAN MAP3K3/DDX42 fusion protein 1 (Fragment) OS=Homo sapiens OX=9606 PE=2 SV=1;tr|B3KTL4|B3KTL4_HUMAN cDNA FLJ38453 fis, clone FEBRA2019663, highly similar to Homo sapiens DEAD (Asp-Glu-Ala-Asp) box polypeptide 42 (DDX42), transcript var	0	0.60206
144	A0A024R1R0;O43731;O43731-2	ER lumen protein-retaining receptor;ER lumen protein-retaining receptor 3	KDELR3	tr|A0A024R1R0|A0A024R1R0_HUMAN ER lumen protein-retaining receptor OS=Homo sapiens OX=9606 GN=KDELR3 PE=3 SV=1;sp|O43731|ERD23_HUMAN ER lumen protein-retaining receptor 3 OS=Homo sapiens OX=9606 GN=KDELR3 PE=2 SV=1;sp|O43731-2|ERD23_HUMAN Isoform 2 of ER l	0	0.60206
3119	Q96A35;X6RJ73	39S ribosomal protein L24, mitochondrial	MRPL24	sp|Q96A35|RM24_HUMAN 39S ribosomal protein L24, mitochondrial OS=Homo sapiens OX=9606 GN=MRPL24 PE=1 SV=1	0	0.60206
928	Q56VW8;A0A140VJT0;P63151;P63151-2;Q6PEG1;Q6IN90;Q66LE6;A0A1W2PQI2;E5RIY1;Q9NZ48;E5RFR9;Q6ZP32;Q00005-6;Q00005;Q00005-2;Q00005-3;Q00005-4;Q00005-5;Q00005-7	Serine/threonine-protein phosphatase 2A 55 kDa regulatory subunit B;Serine/threonine-protein phosphatase 2A 55 kDa regulatory subunit B alpha isoform;Serine/threonine-protein phosphatase 2A 55 kDa regulatory subunit B delta isoform	PPP2R2A;PPP2R2D	tr|Q56VW8|Q56VW8_HUMAN Serine/threonine-protein phosphatase 2A 55 kDa regulatory subunit B OS=Homo sapiens OX=9606 PE=2 SV=1;tr|A0A140VJT0|A0A140VJT0_HUMAN Serine/threonine-protein phosphatase 2A 55 kDa regulatory subunit B OS=Homo sapiens OX=9606 PE=2 SV=	0	0.60206
1872	E7EVX8;Q8WWY3;E7EU94;E7ESX0;E7EN72;B4DWW8;Q8WWY3-3;Q8WWY3-2;Q8WWY3-4	U4/U6 small nuclear ribonucleoprotein Prp31	PRPF31	tr|E7EVX8|E7EVX8_HUMAN U4/U6 small nuclear ribonucleoprotein Prp31 OS=Homo sapiens OX=9606 GN=PRPF31 PE=1 SV=1;sp|Q8WWY3|PRP31_HUMAN U4/U6 small nuclear ribonucleoprotein Prp31 OS=Homo sapiens OX=9606 GN=PRPF31 PE=1 SV=2;tr|E7EU94|E7EU94_HUMAN U4/U6 small	0	0.60206
3326	Q9P227-2;Q9P227;A0A2X0SFL7;A0A087WZ73;A0A087X1W6;A0A087WZZ2;A0A087WTU4;A0A087WXU2	Rho GTPase-activating protein 23	ARHGAP23	sp|Q9P227-2|RHG23_HUMAN Isoform 2 of Rho GTPase-activating protein 23 OS=Homo sapiens OX=9606 GN=ARHGAP23;sp|Q9P227|RHG23_HUMAN Rho GTPase-activating protein 23 OS=Homo sapiens OX=9606 GN=ARHGAP23 PE=1 SV=2;tr|A0A2X0SFL7|A0A2X0SFL7_HUMAN ARHGAP23 (Fragment	0	0.60206
1923	F5H669		CPSF7	tr|F5H669|F5H669_HUMAN Cleavage and polyadenylation-specificity factor subunit 7 (Fragment) OS=Homo sapiens OX=9606 GN=CPSF7 PE=1 SV=1	0	0.60206
2868	Q5TEC6	Histone H3	HIST2H3PS2	tr|Q5TEC6|Q5TEC6_HUMAN Histone H3 OS=Homo sapiens OX=9606 GN=HIST2H3PS2 PE=1 SV=1	0	0.60206
2231	O95235;O95235-2;D6R9E4;D6RBN1	Kinesin-like protein KIF20A;Kinesin-like protein	KIF20A	sp|O95235|KI20A_HUMAN Kinesin-like protein KIF20A OS=Homo sapiens OX=9606 GN=KIF20A PE=1 SV=1;sp|O95235-2|KI20A_HUMAN Isoform 2 of Kinesin-like protein KIF20A OS=Homo sapiens OX=9606 GN=KIF20A;tr|D6R9E4|D6R9E4_HUMAN Kinesin-like protein KIF20A (Fragment) O	-16.1542	0.637951
486	A0A024RAL3;Q7Z3T8;B3KXA7;Q7Z3T8-3	Zinc finger FYVE domain-containing protein 16	ZFYVE16	tr|A0A024RAL3|A0A024RAL3_HUMAN Zinc finger FYVE domain-containing protein OS=Homo sapiens OX=9606 GN=ZFYVE16 PE=4 SV=1;sp|Q7Z3T8|ZFY16_HUMAN Zinc finger FYVE domain-containing protein 16 OS=Homo sapiens OX=9606 GN=ZFYVE16 PE=1 SV=3	-16.9312	0.751355
2168	O60293-2;O60293;G3V1X1;O60293-4	Zinc finger C3H1 domain-containing protein	ZFC3H1	sp|O60293-2|ZC3H1_HUMAN Isoform 2 of Zinc finger C3H1 domain-containing protein OS=Homo sapiens OX=9606 GN=ZFC3H1;sp|O60293|ZC3H1_HUMAN Zinc finger C3H1 domain-containing protein OS=Homo sapiens OX=9606 GN=ZFC3H1 PE=1 SV=3	-17.6433	0.60206
3066	Q8TC07-2;Q8TC07-3;C9JA93;Q8TC07;A8K8E1;F8VV61;Q9NSR4	TBC1 domain family member 15	TBC1D15	sp|Q8TC07-2|TBC15_HUMAN Isoform 2 of TBC1 domain family member 15 OS=Homo sapiens OX=9606 GN=TBC1D15;sp|Q8TC07-3|TBC15_HUMAN Isoform 3 of TBC1 domain family member 15 OS=Homo sapiens OX=9606 GN=TBC1D15;tr|C9JA93|C9JA93_HUMAN TBC1 domain family member 15 (F	-17.7002	0.697523
2483	P51116	Fragile X mental retardation syndrome-related protein 2	FXR2	sp|P51116|FXR2_HUMAN Fragile X mental retardation syndrome-related protein 2 OS=Homo sapiens OX=9606 GN=FXR2 PE=1 SV=2	-17.7534	0.60206
67	A0A024QZW7;P49790-2;P49790;P49790-3	Nuclear pore complex protein Nup153	NUP153	tr|A0A024QZW7|A0A024QZW7_HUMAN Nucleoporin 153kDa, isoform CRA_a OS=Homo sapiens OX=9606 GN=NUP153 PE=4 SV=1;sp|P49790-2|NU153_HUMAN Isoform 2 of Nuclear pore complex protein Nup153 OS=Homo sapiens OX=9606 GN=NUP153;sp|P49790|NU153_HUMAN Nuclear pore compl	-17.9243	0.862102
507	B4DF22;Q59G16;A0A024RB22;F8VXC8;Q8TAQ2-2;Q8TAQ2-3;Q8TAQ2	SWI/SNF complex subunit SMARCC2	SMARCC2	tr|B4DF22|B4DF22_HUMAN cDNA FLJ55615, highly similar to SWI/SNF-related matrix-associatedactin-dependent regulator of chromatin subfamily C member 2 OS=Homo sapiens OX=9606 PE=2 SV=1;tr|Q59G16|Q59G16_HUMAN SWI/SNF-related matrix-associated actin-dependent	-18.0502	0.792782
866	A0A2R8YDQ0;A0A0S2Z577;Q9H267;A0A0S2Z555;G3V3F9;F5H008;B7Z1N4;A0A0S2Z589;B7Z6M7;Q9H267-2	Vacuolar protein sorting-associated protein 33B	VPS33B	tr|A0A2R8YDQ0|A0A2R8YDQ0_HUMAN Uncharacterized protein OS=Homo sapiens OX=9606 PE=3 SV=1;tr|A0A0S2Z577|A0A0S2Z577_HUMAN Vacuolar protein sorting 33-like protein B isoform 1 (Fragment) OS=Homo sapiens OX=9606 GN=VPS33B PE=2 SV=1;sp|Q9H267|VP33B_HUMAN Vacuol	-18.2258	0.60206
3145	Q96HA1	Nuclear envelope pore membrane protein POM 121	POM121	sp|Q96HA1|P121A_HUMAN Nuclear envelope pore membrane protein POM 121 OS=Homo sapiens OX=9606 GN=POM121 PE=1 SV=2	-18.7294	0.60206
1457	B3KNZ3;Q7Z4I5;A0A024RAH1;Q7Z4I7-3;Q7Z4I7;Q7Z4I7-5;Q7Z4I7-2	LIM and senescent cell antigen-like-containing domain protein 2	LIMS2	tr|B3KNZ3|B3KNZ3_HUMAN LIM and senescent cell antigen-like-containing domain protein OS=Homo sapiens OX=9606 PE=2 SV=1;tr|Q7Z4I5|Q7Z4I5_HUMAN LIM-like protein 2D OS=Homo sapiens OX=9606 PE=2 SV=1;tr|A0A024RAH1|A0A024RAH1_HUMAN LIM and senescent cell antige	-18.7403	0.60206
2474	P49750-3;H0YI23	YLP motif-containing protein 1	YLPM1	sp|P49750-3|YLPM1_HUMAN Isoform 3 of YLP motif-containing protein 1 OS=Homo sapiens OX=9606 GN=YLPM1	-18.7435	0.759897
999	A0A1W6S962;E5FF37;H7C4S5;D7PBN4;A0A2R8Y492;D7RF68;H7C560;A0A2U3TZI2;A0A2R8Y8E0;Q5IBP5;P15056			tr|A0A1W6S962|A0A1W6S962_HUMAN GTF2I-BRAF fusion protein OS=Homo sapiens OX=9606 GN=GTF2I PE=2 SV=1	-18.8549	0.60206
2112	O14578;O14578-4;H7BYJ3;O14578-3;H0YGG8;O14578-2	Citron Rho-interacting kinase	CIT	sp|O14578|CTRO_HUMAN Citron Rho-interacting kinase OS=Homo sapiens OX=9606 GN=CIT PE=1 SV=2;sp|O14578-4|CTRO_HUMAN Isoform 4 of Citron Rho-interacting kinase OS=Homo sapiens OX=9606 GN=CIT;tr|H7BYJ3|H7BYJ3_HUMAN Citron Rho-interacting kinase (Fragment) OS=	-19.0805	0.810502
1424	B2RMV2;Q69YQ0-2;Q69YQ0;C9J8U1;F8WAN1;Q59GT7	Cytospin-A	CYTSA;SPECC1L;SPECC1L-ADORA2A	tr|B2RMV2|B2RMV2_HUMAN CYTSA protein OS=Homo sapiens OX=9606 GN=CYTSA PE=2 SV=1;sp|Q69YQ0-2|CYTSA_HUMAN Isoform 2 of Cytospin-A OS=Homo sapiens OX=9606 GN=SPECC1L;sp|Q69YQ0|CYTSA_HUMAN Cytospin-A OS=Homo sapiens OX=9606 GN=SPECC1L PE=1 SV=2;tr|C9J8U1|C9J8U	-19.1332	0.792523
2848	Q5RI18		HNRNPU	tr|Q5RI18|Q5RI18_HUMAN Heterogeneous nuclear ribonucleoprotein U OS=Homo sapiens OX=9606 GN=HNRNPU PE=1 SV=9	-19.1476	0.60206
1890	E9PS17;E9PK59;Q96KG9-3;Q96KG9-4;Q96KG9-2;Q96KG9;Q96KG9-5;Q96KG9-6;E9PPN3;B4DXZ7;H0YCI6;A0A0A0MQX4;H0YDH0	N-terminal kinase-like protein	SCYL1	tr|E9PS17|E9PS17_HUMAN N-terminal kinase-like protein OS=Homo sapiens OX=9606 GN=SCYL1 PE=1 SV=1;tr|E9PK59|E9PK59_HUMAN N-terminal kinase-like protein OS=Homo sapiens OX=9606 GN=SCYL1 PE=1 SV=1;sp|Q96KG9-3|SCYL1_HUMAN Isoform 3 of N-terminal kinase-like pr	-19.246	1.23795
3162	Q96PK6-5	RNA-binding protein 14	RBM14	sp|Q96PK6-5|RBM14_HUMAN Isoform 5 of RNA-binding protein 14 OS=Homo sapiens OX=9606 GN=RBM14	-19.4087	1.46894
2837	Q5JSZ5;Q5JSZ5-5;A0A1W2PQP5;Q9BU62;H0Y412;Q5H9R5;B4E3S7;Q5JSZ9;Q5JSZ5-2;Q5JSZ5-3	Protein PRRC2B	PRRC2B	sp|Q5JSZ5|PRC2B_HUMAN Protein PRRC2B OS=Homo sapiens OX=9606 GN=PRRC2B PE=1 SV=2;sp|Q5JSZ5-5|PRC2B_HUMAN Isoform 1 of Protein PRRC2B OS=Homo sapiens OX=9606 GN=PRRC2B	-19.4217	0.60206
1696	B7Z4N1;A6NNZ2;CON__ENSEMBL:ENSBTAP00000025008;Q9H4B7;I0CMK4			tr|B7Z4N1|B7Z4N1_HUMAN cDNA FLJ53906, highly similar to Tubulin beta chain OS=Homo sapiens OX=9606 PE=2 SV=1	-19.4969	0.60206
1728	E5RJM0;B7ZLQ8;D3DQM9;Q17RY0-2;Q17RY0;E5RFP2;Q17RY0-3;H0YBG1;H0Y9D9;E1CJT3;B3KXC1;J3KN18;Q5QP71;Q7Z5Q1-7;Q7Z5Q1-5;Q7Z5Q1-4;Q7Z5Q1-6;Q7Z5Q1-3;Q7Z5Q1;Q8NE35-2;Q8NE35;Q7Z5Q1-8;Q7Z5Q1-9	Cytoplasmic polyadenylation element-binding protein 4	CPEB4	tr|E5RJM0|E5RJM0_HUMAN Cytoplasmic polyadenylation element-binding protein 4 OS=Homo sapiens OX=9606 GN=CPEB4 PE=1 SV=1;tr|B7ZLQ8|B7ZLQ8_HUMAN CPEB4 protein OS=Homo sapiens OX=9606 GN=CPEB4 PE=1 SV=1;tr|D3DQM9|D3DQM9_HUMAN Cytoplasmic polyadenylation eleme	-19.7039	1.13736
2805	Q53HH4			tr|Q53HH4|Q53HH4_HUMAN Ras-GTPase-activating protein SH3-domain-binding protein variant (Fragment) OS=Homo sapiens OX=9606 PE=2 SV=1	-19.8695	0.60206
2486	P51531-2;P51531;A0A0U1RQZ9;F6VDE0;B4DK35;A0A0U1RRJ8;F6RS74;A0A0A0MT03;A0A1B0GWA8;A0A1B0GU54;Q56A76	Probable global transcription activator SNF2L2	SMARCA2	sp|P51531-2|SMCA2_HUMAN Isoform Short of Probable global transcription activator SNF2L2 OS=Homo sapiens OX=9606 GN=SMARCA2;sp|P51531|SMCA2_HUMAN Probable global transcription activator SNF2L2 OS=Homo sapiens OX=9606 GN=SMARCA2 PE=1 SV=2;tr|A0A0U1RQZ9|A0A0U	-19.8712	1.39667
1617	B4DTZ7;Q68DH5	LMBR1 domain-containing protein 2	LMBRD2	tr|B4DTZ7|B4DTZ7_HUMAN cDNA FLJ57146, highly similar to Homo sapiens LMBR1 domain containing 2 (LMBRD2), mRNA OS=Homo sapiens OX=9606 PE=2 SV=1;sp|Q68DH5|LMBD2_HUMAN LMBR1 domain-containing protein 2 OS=Homo sapiens OX=9606 GN=LMBRD2 PE=1 SV=1	-19.8983	0.60206
638	A0A087WXL5;D3TTY9;A0A087X1N1;D3TTY8;D3TTY5;D3TTZ1;A0A087WU80;D3TTZ2;D3TTZ4;D3TTZ3;P21580;D3TTZ0;D3TTY6;Q5VXQ9;D3TTY4;F8K9X7;D3TTZ7;D3TTY7;Q5VXQ8;D3TTZ5;A0A087WVN3;D3TTZ6;D3TTZ8;Q5VXR0	Tumor necrosis factor alpha-induced protein 3;A20p50;A20p37	TNFAIP3	tr|A0A087WXL5|A0A087WXL5_HUMAN Tumor necrosis factor alpha-induced protein 3 OS=Homo sapiens OX=9606 GN=TNFAIP3 PE=1 SV=2;tr|D3TTY9|D3TTY9_HUMAN Truncated tumor necrosis factor alpha-induced protein 3 OS=Homo sapiens OX=9606 GN=TNFAIP3 PE=2 SV=1;tr|A0A087X	-19.9012	1.51189
742	E9PMS6;A0A1P7ZIM8;A0A0A0MTE2;E9PMT2;F8WD26;F8J2B5;J3KP06;Q8WWI1-3;Q8WWI1-5;Q8WWI1-4;Q8WWI1-2;Q8WWI1;E9PMP7;H0Y424;B7Z8W3	LIM domain only protein 7	LMO7	tr|E9PMS6|E9PMS6_HUMAN LIM domain only protein 7 OS=Homo sapiens OX=9606 GN=LMO7 PE=1 SV=1;tr|A0A1P7ZIM8|A0A1P7ZIM8_HUMAN LMO7b OS=Homo sapiens OX=9606 PE=2 SV=1;tr|A0A0A0MTE2|A0A0A0MTE2_HUMAN LIM domain only protein 7 OS=Homo sapiens OX=9606 GN=LMO7 PE=1	-19.912	1.68394
2165	O43896	Kinesin-like protein KIF1C	KIF1C	sp|O43896|KIF1C_HUMAN Kinesin-like protein KIF1C OS=Homo sapiens OX=9606 GN=KIF1C PE=1 SV=3	-19.9127	0.683034
2881	Q63ZY3-3;Q63ZY3;Q63ZY3-2;K7EIU4;K7ERU2	KN motif and ankyrin repeat domain-containing protein 2	KANK2	sp|Q63ZY3-3|KANK2_HUMAN Isoform 3 of KN motif and ankyrin repeat domain-containing protein 2 OS=Homo sapiens OX=9606 GN=KANK2;sp|Q63ZY3|KANK2_HUMAN KN motif and ankyrin repeat domain-containing protein 2 OS=Homo sapiens OX=9606 GN=KANK2 PE=1 SV=1;sp|Q63ZY3	-19.953	1.75291
1455	B3KNM8;B4E2X3;C4B4C6;Q8N6R0-3;Q8N6R0;B3KNI0;Q8N6R0-4;Q8N6R0-2;Q8N6R0-1;B3KM50	Methyltransferase-like protein 13	feat;METTL13	tr|B3KNM8|B3KNM8_HUMAN cDNA FLJ14980 fis, clone Y79AA1000181, highly similar to Homo sapiens CGI-01 protein mRNA OS=Homo sapiens OX=9606 PE=2 SV=1;tr|B4E2X3|B4E2X3_HUMAN cDNA FLJ56024 OS=Homo sapiens OX=9606 PE=2 SV=1;tr|C4B4C6|C4B4C6_HUMAN Antiapoptotic p	-20.0684	1.24736
1600	B4DQZ7;A0A087WYN3			tr|B4DQZ7|B4DQZ7_HUMAN cDNA FLJ50838, highly similar to Apoptotic chromatin condensation inducer in thenucleus (Fragment) OS=Homo sapiens OX=9606 PE=2 SV=1	-20.1001	0.909648
3492	U3KPZ7;B3KY61		RBM27	tr|U3KPZ7|U3KPZ7_HUMAN Uncharacterized protein OS=Homo sapiens OX=9606 PE=4 SV=1;tr|B3KY61|B3KY61_HUMAN cDNA FLJ16787 fis, clone PLACE6013222, weakly similar to Mus musculus RNA binding motif protein 26 (Rbm26), mRNA (Fragment) OS=Homo sapiens OX=9606 PE=2	-20.105	0.60206
1001	A0A223PQH6;A6NEM2;P51610-2;P51610;P51610-4;Q05C05;P51610-3	Host cell factor 1;HCF N-terminal chain 1;HCF N-terminal chain 2;HCF N-terminal chain 3;HCF N-terminal chain 4;HCF N-terminal chain 5;HCF N-terminal chain 6;HCF C-terminal chain 1;HCF C-terminal chain 2;HCF C-terminal chain 3;HCF C-terminal chain 4;HCF C-terminal chain 5;HCF C-terminal chain 6	HCFC1	tr|A0A223PQH6|A0A223PQH6_HUMAN HCFC1 OS=Homo sapiens OX=9606 PE=4 SV=1;tr|A6NEM2|A6NEM2_HUMAN Host cell factor 1 OS=Homo sapiens OX=9606 GN=HCFC1 PE=1 SV=2;sp|P51610-2|HCFC1_HUMAN Isoform 2 of Host cell factor 1 OS=Homo sapiens OX=9606 GN=HCFC1;sp|P51610|H	-20.3007	1.25275
24	H0YD75;A0A024QZ12;Q9UBE8	Mitogen-activated protein kinase;Serine/threonine-protein kinase NLK	NLK	tr|H0YD75|H0YD75_HUMAN Mitogen-activated protein kinase (Fragment) OS=Homo sapiens OX=9606 GN=NLK PE=1 SV=1;tr|A0A024QZ12|A0A024QZ12_HUMAN Mitogen-activated protein kinase OS=Homo sapiens OX=9606 GN=NLK PE=3 SV=1;sp|Q9UBE8|NLK_HUMAN Serine/threonine-protei	-20.3177	1.17621
3375	Q9UPQ0-10;Q9UPQ0-2;Q9UPQ0-4;Q9UPQ0;D6RD46;B7Z656;B7Z3F1;B7Z5Q8;E7EPK0;E9PDJ9;B7Z2J4;H0Y8P3;G5EA03;Q9UPQ0-9;Q9UPQ0-8;Q9UPQ0-6;Q9UPQ0-5;Q9UPQ0-3;B7Z5G6;B7Z3G0;Q6N054;B7Z7Z0	LIM and calponin homology domains-containing protein 1	LIMCH1	sp|Q9UPQ0-10|LIMC1_HUMAN Isoform 10 of LIM and calponin homology domains-containing protein 1 OS=Homo sapiens OX=9606 GN=LIMCH1;sp|Q9UPQ0-2|LIMC1_HUMAN Isoform 2 of LIM and calponin homology domains-containing protein 1 OS=Homo sapiens OX=9606 GN=LIMCH1;sp	-20.318	1.20405
1715	E7EWK3;B7Z8P5;Q9H2U1-3;Q9H2U1;Q9H2U1-2;H7C5F5;H7C514	ATP-dependent RNA helicase DHX36	DHX36	tr|E7EWK3|E7EWK3_HUMAN ATP-dependent RNA helicase DHX36 (Fragment) OS=Homo sapiens OX=9606 GN=DHX36 PE=1 SV=1;tr|B7Z8P5|B7Z8P5_HUMAN cDNA FLJ51438, highly similar to Probable ATP-dependent RNA helicase DHX36 (Fragment) OS=Homo sapiens OX=9606 PE=2 SV=1;sp|	-20.3856	1.39264
2216	O94875-12;O94875-3;O94875-8;O94875-2;O94875-4;O94875-10;H7BXR3;O94875-5;B3KPU4;H7C1R7	Sorbin and SH3 domain-containing protein 2	SORBS2	sp|O94875-12|SRBS2_HUMAN Isoform 12 of Sorbin and SH3 domain-containing protein 2 OS=Homo sapiens OX=9606 GN=SORBS2;sp|O94875-3|SRBS2_HUMAN Isoform 3 of Sorbin and SH3 domain-containing protein 2 OS=Homo sapiens OX=9606 GN=SORBS2;sp|O94875-8|SRBS2_HUMAN Is	-20.5798	0.60206
3300	Q9NXV6;B3KTW3;J3KNE1;D6RGD2	CDKN2A-interacting protein	CDKN2AIP	sp|Q9NXV6|CARF_HUMAN CDKN2A-interacting protein OS=Homo sapiens OX=9606 GN=CDKN2AIP PE=1 SV=3;tr|B3KTW3|B3KTW3_HUMAN cDNA FLJ38861 fis, clone MESAN2011984, highly similar to Homo sapiens collaborates/cooperates with ARF (alternate reading frame) protein (C	-20.5847	1.07399
2948	Q71RC2-6;Q71RC2-5;Q71RC2;Q71RC2-4;Q6P4E2;Q71RC2-7;F8W1Z5;X6RLN4	La-related protein 4	LARP4	sp|Q71RC2-6|LARP4_HUMAN Isoform 6 of La-related protein 4 OS=Homo sapiens OX=9606 GN=LARP4;sp|Q71RC2-5|LARP4_HUMAN Isoform 5 of La-related protein 4 OS=Homo sapiens OX=9606 GN=LARP4;sp|Q71RC2|LARP4_HUMAN La-related protein 4 OS=Homo sapiens OX=9606 GN=LARP	-20.5949	0.843249
1512	B4DE59;C9JTX4;C9J826;C9JK18;C9JKY1;C9JPI2;K7ERP3			tr|B4DE59|B4DE59_HUMAN cDNA FLJ60424, highly similar to Junction plakoglobin OS=Homo sapiens OX=9606 PE=2 SV=1	-20.6817	0.759327
1925	F5H867;F5GZR9		SLC3A2	tr|F5H867|F5H867_HUMAN 4F2 cell-surface antigen heavy chain (Fragment) OS=Homo sapiens OX=9606 GN=SLC3A2 PE=1 SV=1	-20.7063	0.60206
1481	B3KTJ9;Q8N163-2;Q8N163;H0YC69;E5RFJ3;H0YC58;E5RGU7;E5RHJ4;G3V119;H0YB24	Cell cycle and apoptosis regulator protein 2	CCAR2	tr|B3KTJ9|B3KTJ9_HUMAN cDNA FLJ38393 fis, clone FEBRA2007212 OS=Homo sapiens OX=9606 PE=2 SV=1;sp|Q8N163-2|CCAR2_HUMAN Isoform 2 of Cell cycle and apoptosis regulator protein 2 OS=Homo sapiens OX=9606 GN=CCAR2;sp|Q8N163|CCAR2_HUMAN Cell cycle and apoptosis	-20.7125	0.909127
2176	O60506-3;O60506-4;Q59GL1;B7Z645;O60506-5;B7Z213;H0YAA0	Heterogeneous nuclear ribonucleoprotein Q	SYNCRIP	sp|O60506-3|HNRPQ_HUMAN Isoform 3 of Heterogeneous nuclear ribonucleoprotein Q OS=Homo sapiens OX=9606 GN=SYNCRIP;sp|O60506-4|HNRPQ_HUMAN Isoform 4 of Heterogeneous nuclear ribonucleoprotein Q OS=Homo sapiens OX=9606 GN=SYNCRIP;tr|Q59GL1|Q59GL1_HUMAN Synap	-20.7887	0.880379
401	Q7Z3C4;A0A0A0MSW3;A0A024R8B6;P35658-2;P35658-4;P35658;P35658-3;P35658-5;H0Y837;H0YF36;B4DZN4;E9PKD2;B7ZAX0;B7ZAV2;B4DYZ6	Nuclear pore complex protein Nup214	DKFZp686J0330;NUP214	tr|Q7Z3C4|Q7Z3C4_HUMAN Uncharacterized protein DKFZp686J0330 OS=Homo sapiens OX=9606 GN=DKFZp686J0330 PE=2 SV=1;tr|A0A0A0MSW3|A0A0A0MSW3_HUMAN Nuclear pore complex protein Nup214 OS=Homo sapiens OX=9606 GN=NUP214 PE=1 SV=1;tr|A0A024R8B6|A0A024R8B6_HUMAN Nu	-20.7961	0.763514
803	B7Z852;A2ABF8;A0A0G2JIR1;A2ABF9;A0A0G2JK64;A0A0G2JIS2;A0A1U9X7P8;A0A024RCN9;Q96KQ7-2;Q96KQ7;A0A0G2JRR0;A0A0G2JRN8;Q59FM7;Q96KQ7-3	Histone-lysine N-methyltransferase EHMT2	EHMT2	tr|B7Z852|B7Z852_HUMAN cDNA FLJ61730, highly similar to Histone-lysine N-methyltransferase, H3 lysine-9 specific 3 OS=Homo sapiens OX=9606 PE=2 SV=1;tr|A2ABF8|A2ABF8_HUMAN Histone-lysine N-methyltransferase EHMT2 OS=Homo sapiens OX=9606 GN=EHMT2 PE=1 SV=1;	-20.8509	0.77908
39	A0A087WVT1;A0A024QZB9;Q96MX3	Zinc finger protein 48	ZNF48;ZNF553	tr|A0A087WVT1|A0A087WVT1_HUMAN Zinc finger protein 48 OS=Homo sapiens OX=9606 GN=ZNF48 PE=1 SV=1;tr|A0A024QZB9|A0A024QZB9_HUMAN Zinc finger protein 553, isoform CRA_a OS=Homo sapiens OX=9606 GN=ZNF553 PE=4 SV=1;sp|Q96MX3|ZNF48_HUMAN Zinc finger protein 48	-21.1594	1.01151
92	A0A024R0H6;Q8N7H5-3;Q8N7H5;Q8N7H5-2;B4DGJ5	RNA polymerase II-associated factor 1 homolog	PAF1	tr|A0A024R0H6|A0A024R0H6_HUMAN Paf1, RNA polymerase II associated factor, homolog (S. cerevisiae), isoform CRA_a OS=Homo sapiens OX=9606 GN=PAF1 PE=4 SV=1;sp|Q8N7H5-3|PAF1_HUMAN Isoform 3 of RNA polymerase II-associated factor 1 homolog OS=Homo sapiens OX=	-21.1693	0.989127
3117	Q969S3	Zinc finger protein 622	ZNF622	sp|Q969S3|ZN622_HUMAN Zinc finger protein 622 OS=Homo sapiens OX=9606 GN=ZNF622 PE=1 SV=1	-21.1978	1.03276
1893	E9PKG1;Q5U8W9;Q99873-2;Q99873-3;Q99873;E9PIX6;B4DJ87;E9PNR9;E9PQ98;H0YDE4;Q99873-5	Protein arginine N-methyltransferase 1	PRMT1;HRMT1L2	tr|E9PKG1|E9PKG1_HUMAN Protein arginine N-methyltransferase 1 OS=Homo sapiens OX=9606 GN=PRMT1 PE=1 SV=1;tr|Q5U8W9|Q5U8W9_HUMAN Protein arginine methyltransferase 1 isoform 4 OS=Homo sapiens OX=9606 GN=HRMT1L2 PE=2 SV=1;sp|Q99873-2|ANM1_HUMAN Isoform 2 of	-21.2173	0.76122
757	M9P9U0;A0A0A7C8J0;G1ENK8		HLA-C	tr|M9P9U0|M9P9U0_HUMAN MHC class I antigen (Fragment) OS=Homo sapiens OX=9606 GN=HLA-C PE=3 SV=1;tr|A0A0A7C8J0|A0A0A7C8J0_HUMAN MHC class I antigen (Fragment) OS=Homo sapiens OX=9606 GN=HLA-C PE=3 SV=1	-21.2215	1.35779
1371	B2R858;P26196;Q8IV96	Probable ATP-dependent RNA helicase DDX6	DDX6	tr|B2R858|B2R858_HUMAN cDNA, FLJ93750, Homo sapiens DEAD (Asp-Glu-Ala-Asp) box polypeptide 6 (DDX6), mRNA OS=Homo sapiens OX=9606 PE=2 SV=1;sp|P26196|DDX6_HUMAN Probable ATP-dependent RNA helicase DDX6 OS=Homo sapiens OX=9606 GN=DDX6 PE=1 SV=2	-21.2231	0.727112
960	A0A1B0GV09;Q9H9B1;A0A1B0GU48;Q9H9B1-4;Q9H9B1-3;A0A0C4DGF8;A0A1B0GWF6;A0A1W2PPZ7;A0A1B0GVZ8;A0A1B0GUD1;A0A0D9SEP2;A0A0D9SFS4;A0A0D9SER3;A0A0D9SFG7;Q71M33;A0A0D9SF38;A0A0D9SER9;A0A0D9SFX4;A0A1B0GW79;A0PJE0;A0A0D9SEQ1	Histone-lysine N-methyltransferase EHMT1	EHMT1	tr|A0A1B0GV09|A0A1B0GV09_HUMAN Histone-lysine N-methyltransferase EHMT1 OS=Homo sapiens OX=9606 GN=EHMT1 PE=1 SV=1;sp|Q9H9B1|EHMT1_HUMAN Histone-lysine N-methyltransferase EHMT1 OS=Homo sapiens OX=9606 GN=EHMT1 PE=1 SV=4;tr|A0A1B0GU48|A0A1B0GU48_HUMAN Hist	-21.2943	0.69456
885	V9GY48;H0UI99;H0UI97;A0A0S2Z5X3;A0A0S2Z6H0;Q8N5A5-3;Q8N5A5-2;Q8N5A5;Q8N5A5-4;A0A0J9YYD9	Zinc finger CCCH-type with G patch domain-containing protein	ZGPAT	tr|V9GY48|V9GY48_HUMAN Uncharacterized protein (Fragment) OS=Homo sapiens OX=9606 PE=4 SV=1;tr|H0UI99|H0UI99_HUMAN Zinc finger, CCCH-type with G patch domain, isoform CRA_b OS=Homo sapiens OX=9606 GN=ZGPAT PE=4 SV=1;tr|H0UI97|H0UI97_HUMAN Zinc finger, CCCH	-21.3008	0.83439
1184	B4DP10;A8K2G0;O15126;B4E2V7;A0A087WXB0;Q96AZ4;A0A087WU14;O15126-2;A0A087WTX8;A0A087WZA6	Secretory carrier-associated membrane protein 1	SCAMP1	tr|B4DP10|B4DP10_HUMAN Secretory carrier-associated membrane protein OS=Homo sapiens OX=9606 PE=2 SV=1;tr|A8K2G0|A8K2G0_HUMAN Secretory carrier-associated membrane protein OS=Homo sapiens OX=9606 PE=2 SV=1;sp|O15126|SCAM1_HUMAN Secretory carrier-associated	-21.3195	0.60206
1716	B7Z8X5;Q59FC9			tr|B7Z8X5|B7Z8X5_HUMAN cDNA FLJ61541, highly similar to Homo sapiens PDZ and LIM domain 5 (PDLIM5), transcript variant 2, mRNA OS=Homo sapiens OX=9606 PE=2 SV=1;tr|Q59FC9|Q59FC9_HUMAN Enigma homolog (Fragment) OS=Homo sapiens OX=9606 PE=2 SV=1	-21.3333	1.60614
1995	H3BUF6;Q8WWM7-7;H3BSK9;H3BSQ5;H3BUE3	Ataxin-2-like protein	ATXN2L	tr|H3BUF6|H3BUF6_HUMAN Ataxin-2-like protein OS=Homo sapiens OX=9606 GN=ATXN2L PE=1 SV=1;sp|Q8WWM7-7|ATX2L_HUMAN Isoform 7 of Ataxin-2-like protein OS=Homo sapiens OX=9606 GN=ATXN2L	-21.3903	0.93451
2989	Q86X69			tr|Q86X69|Q86X69_HUMAN PON2 protein OS=Homo sapiens OX=9606 PE=2 SV=1	-21.4529	0.60206
709	C9JP00;A0A0A0MQX8;Q9NR56;Q9NR56-7;B4E3F7;O95205;A0PJJ3;A2A3S3;Q5VZF2-3;Q5VZF2-2;Q5VZF2;B1AKI6;Q86VM6;Q9NUK0-2;Q9NUK0;C9J4T8;B4E233;Q9NUK0-4;Q9NUK0-3	Muscleblind-like protein 1;Muscleblind-like protein 2	MBNL1;MBLL;MBNL2	tr|C9JP00|C9JP00_HUMAN Muscleblind-like protein 1 OS=Homo sapiens OX=9606 GN=MBNL1 PE=1 SV=1;tr|A0A0A0MQX8|A0A0A0MQX8_HUMAN Muscleblind-like protein 1 OS=Homo sapiens OX=9606 GN=MBNL1 PE=1 SV=1;sp|Q9NR56|MBNL1_HUMAN Muscleblind-like protein 1 OS=Homo sapie	-21.5155	1.72043
1902	E9PQL1;Q8TAV0;Q8TAV0-3;A8K255;Q8TAV0-5;Q8TAV0-2;Q8TAV0-4	Protein FAM76A	FAM76A	tr|E9PQL1|E9PQL1_HUMAN Protein FAM76A OS=Homo sapiens OX=9606 GN=FAM76A PE=1 SV=1;sp|Q8TAV0|FA76A_HUMAN Protein FAM76A OS=Homo sapiens OX=9606 GN=FAM76A PE=2 SV=1;sp|Q8TAV0-3|FA76A_HUMAN Isoform 3 of Protein FAM76A OS=Homo sapiens OX=9606 GN=FAM76A;tr|A8K2	-21.5976	0.60206
542	C9J7T7;C9JE98;A0A024RBU9;C9J0Q5;C9JFD3;A0A024RBS3;Q9Y618-5;Q9Y618-4;Q9Y618;Q9Y618-2;Q9BT61;H7C184;H7C0P3	Nuclear receptor corepressor 2	NCOR2	tr|C9J7T7|C9J7T7_HUMAN Nuclear receptor corepressor 2 OS=Homo sapiens OX=9606 GN=NCOR2 PE=1 SV=3;tr|C9JE98|C9JE98_HUMAN Nuclear receptor corepressor 2 OS=Homo sapiens OX=9606 GN=NCOR2 PE=1 SV=1;tr|A0A024RBU9|A0A024RBU9_HUMAN Nuclear receptor co-repressor 2	-21.6923	1.0876
795	A0A0D9SF63;Q9BZK7;B7Z475;A0A1B0GUU2;F8W9D8;C9IYU9;A0A068L529;C9JCW4;C9JLJ1;C9JTW8;C9JY82;C9JCK0;C9JBN1;C9JEC9;C9J3H2;C9J903;A0A0D9SEW5;A0A0D9SFS8;C9J7E1;A0A0D9SF25;A0A1B0GVH3;B4DP68;A0A024R189;A0A2R8YFW3;Q59F53;A0A024RBV9;Q9BQ87;O60907-2;O60907	F-box-like/WD repeat-containing protein TBL1XR1	TBL1XR1	tr|A0A0D9SF63|A0A0D9SF63_HUMAN F-box-like/WD repeat-containing protein TBL1XR1 OS=Homo sapiens OX=9606 GN=TBL1XR1 PE=1 SV=1;sp|Q9BZK7|TBL1R_HUMAN F-box-like/WD repeat-containing protein TBL1XR1 OS=Homo sapiens OX=9606 GN=TBL1XR1 PE=1 SV=1;tr|B7Z475|B7Z475_	-21.7177	3.42787
2930	Q6UN15-5;Q6UN15-3;Q6UN15-4	Pre-mRNA 3-end-processing factor FIP1	FIP1L1	sp|Q6UN15-5|FIP1_HUMAN Isoform 5 of Pre-mRNA 3-end-processing factor FIP1 OS=Homo sapiens OX=9606 GN=FIP1L1;sp|Q6UN15-3|FIP1_HUMAN Isoform 3 of Pre-mRNA 3-end-processing factor FIP1 OS=Homo sapiens OX=9606 GN=FIP1L1;sp|Q6UN15-4|FIP1_HUMAN Isoform 4 of Pr	-21.7284	0.60206
659	A0A0C4DGT3;A0A2R8Y7T6;B4DGC5;A0A087WWK8;Q6DN90-2;Q6DN90;A0A2R8Y695	IQ motif and SEC7 domain-containing protein 1	IQSEC1	tr|A0A0C4DGT3|A0A0C4DGT3_HUMAN IQ motif and SEC7 domain-containing protein 1 OS=Homo sapiens OX=9606 GN=IQSEC1 PE=1 SV=1;tr|A0A2R8Y7T6|A0A2R8Y7T6_HUMAN IQ motif and SEC7 domain-containing protein 1 OS=Homo sapiens OX=9606 GN=IQSEC1 PE=1 SV=1;tr|B4DGC5|B4DG	-21.7305	0.829534
1208	A8K4B4;Q9BXS6-4;Q9BXS6-6;Q9BXS6-3;Q9BXS6-5;Q9BXS6-2;Q9BXS6;Q9BXS6-7;H0YMD2;H0YKA7	Nucleolar and spindle-associated protein 1	NUSAP1	tr|A8K4B4|A8K4B4_HUMAN cDNA FLJ78441, highly similar to Homo sapiens nucleolar and spindle associated protein 1 (NUSAP1),mRNA OS=Homo sapiens OX=9606 PE=2 SV=1;sp|Q9BXS6-4|NUSAP_HUMAN Isoform 4 of Nucleolar and spindle-associated protein 1 OS=Homo sapiens	-21.7702	1.08001
1805	D3DPS3;Q3KQU3-2;Q3KQU3-4;Q3KQU3;Q6NX58;B3KU03;A1L1B7;Q3KQU3-3	MAP7 domain-containing protein 1	RPRC1;MAP7D1	tr|D3DPS3|D3DPS3_HUMAN Arginine/proline rich coiled-coil 1, isoform CRA_b OS=Homo sapiens OX=9606 GN=RPRC1 PE=4 SV=1;sp|Q3KQU3-2|MA7D1_HUMAN Isoform 2 of MAP7 domain-containing protein 1 OS=Homo sapiens OX=9606 GN=MAP7D1;sp|Q3KQU3-4|MA7D1_HUMAN Isoform 4 o	-21.7841	0.958337
181	A0A024R2K1;P20339-2;P20339;A0A0A1HAN9	Ras-related protein Rab-5A	RAB5A	tr|A0A024R2K1|A0A024R2K1_HUMAN RAB5A, member RAS oncogene family, isoform CRA_a OS=Homo sapiens OX=9606 GN=RAB5A PE=4 SV=1;sp|P20339-2|RAB5A_HUMAN Isoform 2 of Ras-related protein Rab-5A OS=Homo sapiens OX=9606 GN=RAB5A;sp|P20339|RAB5A_HUMAN Ras-related pr	-21.8039	0.60206
1864	E7EPN9;Q9Y520-3;Q9Y520-6;Q9Y520-4;Q9Y520-5;Q9Y520;Q9Y520-7;Q9Y520-2;B4DM27;B4DQN8;H7C5N8;A0A2R8Y7F4;A0A2R8YET2	Protein PRRC2C	PRRC2C	tr|E7EPN9|E7EPN9_HUMAN Protein PRRC2C OS=Homo sapiens OX=9606 GN=PRRC2C PE=1 SV=1;sp|Q9Y520-3|PRC2C_HUMAN Isoform 3 of Protein PRRC2C OS=Homo sapiens OX=9606 GN=PRRC2C;sp|Q9Y520-6|PRC2C_HUMAN Isoform 6 of Protein PRRC2C OS=Homo sapiens OX=9606 GN=PRRC2C;sp	-21.8592	2.10405
2178	Q53RG0;O60573;C9JEL3;B9A044;B8ZZ50;Q59FE1;O60573-2;B8ZZL3;B4E1E4;B9A023	Eukaryotic translation initiation factor 4E type 2	tmp_locus_9;EIF4E2	tr|Q53RG0|Q53RG0_HUMAN Eukaryotic translation initiation factor 4E member 2, isoform CRA_c OS=Homo sapiens OX=9606 GN=tmp_locus_9 PE=2 SV=1;sp|O60573|IF4E2_HUMAN Eukaryotic translation initiation factor 4E type 2 OS=Homo sapiens OX=9606 GN=EIF4E2 PE=1 SV=1	-21.9462	1.06254
1249	A8K6Q4;P78332;E9PGM9;B4DNY1;B3KSK6;P78332-2;F8WCA5;P78332-3;C9J250;F8WF63	RNA-binding protein 6	RBM6	tr|A8K6Q4|A8K6Q4_HUMAN cDNA FLJ76888, highly similar to Homo sapiens RNA binding motif protein 6 (RBM6), mRNA OS=Homo sapiens OX=9606 PE=2 SV=1;sp|P78332|RBM6_HUMAN RNA-binding protein 6 OS=Homo sapiens OX=9606 GN=RBM6 PE=1 SV=5;tr|E9PGM9|E9PGM9_HUMAN RNA-	-21.9587	0.643273
559	A0A0J9YX88;E9PJ24;B7ZM65;F8WEF5;B7ZM66;A0A0J9YYB5;A0A0J9YWD5;A0A024RCA1;Q9P1Y6-2;Q9P1Y6-3;Q9P1Y6	PHD and RING finger domain-containing protein 1	PHRF1;KIAA1542	tr|A0A0J9YX88|A0A0J9YX88_HUMAN PHD and RING finger domain-containing protein 1 OS=Homo sapiens OX=9606 GN=PHRF1 PE=1 SV=1;tr|E9PJ24|E9PJ24_HUMAN PHD and RING finger domain-containing protein 1 OS=Homo sapiens OX=9606 GN=PHRF1 PE=1 SV=1;tr|B7ZM65|B7ZM65_HUM	-22.0032	1.02549
3345	Q9UHD2;B4E164;F5H206;F5H1A3;F5GZI4	Serine/threonine-protein kinase TBK1	TBK1	sp|Q9UHD2|TBK1_HUMAN Serine/threonine-protein kinase TBK1 OS=Homo sapiens OX=9606 GN=TBK1 PE=1 SV=1;tr|B4E164|B4E164_HUMAN cDNA FLJ56613, highly similar to Serine/threonine-protein kinase TBK1 OS=Homo sapiens OX=9606 PE=2 SV=1	-22.1319	0.722276
1966	H0Y3K4;B4DVQ2;H7C0H2;H7BXM6		RBM33	tr|H0Y3K4|H0Y3K4_HUMAN RNA-binding protein 33 (Fragment) OS=Homo sapiens OX=9606 GN=RBM33 PE=1 SV=1;tr|B4DVQ2|B4DVQ2_HUMAN cDNA FLJ60909, highly similar to Proline-rich protein 8 OS=Homo sapiens OX=9606 PE=2 SV=1	-22.1687	1.0008
2054	J3QR07;Q96MU7-2;Q96MU7;J3KS01	YTH domain-containing protein 1	YTHDC1	tr|J3QR07|J3QR07_HUMAN YTH domain-containing protein 1 OS=Homo sapiens OX=9606 GN=YTHDC1 PE=1 SV=1;sp|Q96MU7-2|YTDC1_HUMAN Isoform 2 of YTH domain-containing protein 1 OS=Homo sapiens OX=9606 GN=YTHDC1;sp|Q96MU7|YTDC1_HUMAN YTH domain-containing protein 1	-22.2301	1.22828
2650	Q12796-2;Q12796;Q49A59	Proline-rich nuclear receptor coactivator 1	PNRC1	sp|Q12796-2|PNRC1_HUMAN Isoform 2 of Proline-rich nuclear receptor coactivator 1 OS=Homo sapiens OX=9606 GN=PNRC1;sp|Q12796|PNRC1_HUMAN Proline-rich nuclear receptor coactivator 1 OS=Homo sapiens OX=9606 GN=PNRC1 PE=1 SV=1	-22.4072	0.811998
1213	A8K4M5;O60563	Cyclin-T1	CCNT1	tr|A8K4M5|A8K4M5_HUMAN cDNA FLJ76043, highly similar to Homo sapiens cyclin T1 (CCNT1), mRNA OS=Homo sapiens OX=9606 PE=2 SV=1;sp|O60563|CCNT1_HUMAN Cyclin-T1 OS=Homo sapiens OX=9606 GN=CCNT1 PE=1 SV=1	-22.4507	1.69802
722	A0A1B0GW37;U3KQE8;Q5VW28;A0A1B0GWJ4;A0A0A0MRX8;A0A1B0GU97;A0A1B0GWI9;Q5VW27;Q5VW30;A0A2R8Y7V8;Q5VW26;O00712;O00712-4;O00712-5;A0A1B0GWB8;A0A1B0GVN4;B4DS74;A0A1B0GTC1;S4R308;K7ESG9;K7EKH0;Q13051;U3KPY9;Q5VW31;K7EJB0;S4R3K4;A0A087WXP2;Q5W0Y9;A0A0S2Z4H3;B1AKN6;Q7Z3K7;C9JWJ8;K7EN08;B1AKN7;B1AKN5;D2DXM9;B4DRN9;B4DHW2;B1AKN8;O00712-2;O00712-6;Q14938-6;Q14938-5;Q14938-3;Q14938-2;Q14938-4;Q12857-2;Q12857…	Nuclear factor 1;Nuclear factor 1 B-type	NFIB	tr|A0A1B0GW37|A0A1B0GW37_HUMAN Nuclear factor 1 OS=Homo sapiens OX=9606 GN=NFIB PE=1 SV=1;tr|U3KQE8|U3KQE8_HUMAN Nuclear factor 1 OS=Homo sapiens OX=9606 GN=NFIB PE=1 SV=2;tr|Q5VW28|Q5VW28_HUMAN Nuclear factor 1 OS=Homo sapiens OX=9606 GN=NFIB PE=2 SV=1;tr	-22.4569	1.11777
2657	Q12986-3;Q12986-2;Q12986;A0JLR2	Transcriptional repressor NF-X1	NFX1	sp|Q12986-3|NFX1_HUMAN Isoform 3 of Transcriptional repressor NF-X1 OS=Homo sapiens OX=9606 GN=NFX1;sp|Q12986-2|NFX1_HUMAN Isoform 2 of Transcriptional repressor NF-X1 OS=Homo sapiens OX=9606 GN=NFX1;sp|Q12986|NFX1_HUMAN Transcriptional repressor NF-X1 OS=	-22.5596	1.20971
893	A0A0U1RRM1;Q8WXI9;B3KSZ4;A0A0U1RR30	Transcriptional repressor p66-beta	GATAD2B	tr|A0A0U1RRM1|A0A0U1RRM1_HUMAN Transcriptional repressor p66-beta OS=Homo sapiens OX=9606 GN=GATAD2B PE=1 SV=1;sp|Q8WXI9|P66B_HUMAN Transcriptional repressor p66-beta OS=Homo sapiens OX=9606 GN=GATAD2B PE=1 SV=1;tr|B3KSZ4|B3KSZ4_HUMAN cDNA FLJ37346 fis, cl	-22.5756	1.45894
1047	A0A2R8YDM9;A0A2R8Y5A6;H0YH87;A0A2R8Y7P6;F8VQP2;F8WB06;Q2M2R5;V9GY86;Q99700-2;Q99700-5;Q99700-4;Q99700;F8VRK6;F8W0B5;A0A2R8Y6W7;F8VVY6;A0A2R8YGV1;F8WB05	Ataxin-2	ATXN2	tr|A0A2R8YDM9|A0A2R8YDM9_HUMAN Ataxin-2 OS=Homo sapiens OX=9606 GN=ATXN2 PE=1 SV=1;tr|A0A2R8Y5A6|A0A2R8Y5A6_HUMAN Ataxin-2 OS=Homo sapiens OX=9606 GN=ATXN2 PE=1 SV=1;tr|H0YH87|H0YH87_HUMAN Ataxin-2 OS=Homo sapiens OX=9606 GN=ATXN2 PE=1 SV=2;tr|A0A2R8Y7P6|A	-22.6624	0.808114
524	F8VQR7;A0A024RBB5;Q16527;F8VW96	Cysteine and glycine-rich protein 2	CSRP2	tr|F8VQR7|F8VQR7_HUMAN Cysteine and glycine-rich protein 2 OS=Homo sapiens OX=9606 GN=CSRP2 PE=1 SV=1;tr|A0A024RBB5|A0A024RBB5_HUMAN Cysteine and glycine-rich protein 2, isoform CRA_a OS=Homo sapiens OX=9606 GN=CSRP2 PE=4 SV=1;sp|Q16527|CSRP2_HUMAN Cystein	-22.7279	0.856071
2882	Q643R0;Q9ULW0;Q9ULW0-2;B3KM90;Q96FC3	Targeting protein for Xklp2	HCTP4;TPX2	tr|Q643R0|Q643R0_HUMAN HCTP4 OS=Homo sapiens OX=9606 GN=HCTP4 PE=1 SV=1;sp|Q9ULW0|TPX2_HUMAN Targeting protein for Xklp2 OS=Homo sapiens OX=9606 GN=TPX2 PE=1 SV=2;sp|Q9ULW0-2|TPX2_HUMAN Isoform 2 of Targeting protein for Xklp2 OS=Homo sapiens OX=9606 GN=TP	-22.7401	0.790026
585	A0A024RDB2;Q9UN86-2;A8K6V7;D6RAC7;D6RB17;D6RGJ4;D6RE13;D6RBW8;D6RBM9;D6REX8;D6RBR0;D6R9X5;D6R9A4	Ras GTPase-activating protein-binding protein 2	G3BP2	tr|A0A024RDB2|A0A024RDB2_HUMAN Ras-GTPase activating protein SH3 domain-binding protein 2, isoform CRA_b OS=Homo sapiens OX=9606 GN=G3BP2 PE=4 SV=1;sp|Q9UN86-2|G3BP2_HUMAN Isoform B of Ras GTPase-activating protein-binding protein 2 OS=Homo sapiens OX=9606	-22.7507	1.15031
367	A0A024R7T3;P52597;B4DKS8;A0A1B0GW42	Heterogeneous nuclear ribonucleoprotein F;Heterogeneous nuclear ribonucleoprotein F, N-terminally processed	HNRPF;HNRNPF	tr|A0A024R7T3|A0A024R7T3_HUMAN Heterogeneous nuclear ribonucleoprotein F, isoform CRA_a OS=Homo sapiens OX=9606 GN=HNRPF PE=4 SV=1;sp|P52597|HNRPF_HUMAN Heterogeneous nuclear ribonucleoprotein F OS=Homo sapiens OX=9606 GN=HNRNPF PE=1 SV=3;tr|B4DKS8|B4DKS8_	-22.7755	0.811974
2350	Q6FGR6;P19387;B7Z6D1;B7Z377;H3BRR2	DNA-directed RNA polymerase II subunit RPB3	POLR2C	tr|Q6FGR6|Q6FGR6_HUMAN HCG2025883, isoform CRA_b OS=Homo sapiens OX=9606 GN=POLR2C PE=2 SV=1;sp|P19387|RPB3_HUMAN DNA-directed RNA polymerase II subunit RPB3 OS=Homo sapiens OX=9606 GN=POLR2C PE=1 SV=2;tr|B7Z6D1|B7Z6D1_HUMAN cDNA FLJ57430, highly similar t	-22.7785	0.836355
3155	Q96KM6	Zinc finger protein 512B	ZNF512B	sp|Q96KM6|Z512B_HUMAN Zinc finger protein 512B OS=Homo sapiens OX=9606 GN=ZNF512B PE=1 SV=1	-22.8252	0.912314
1971	H0YCG1		SF3B2	tr|H0YCG1|H0YCG1_HUMAN Splicing factor 3B subunit 2 (Fragment) OS=Homo sapiens OX=9606 GN=SF3B2 PE=1 SV=1	-22.8473	1.1232
2742	Q15637-5	Splicing factor 1	SF1	sp|Q15637-5|SF01_HUMAN Isoform 5 of Splicing factor 1 OS=Homo sapiens OX=9606 GN=SF1	-22.8812	0.86034
1436	B4E0B9;B4DZC3;B3KMC9;Q9H0D6-2;Q9H0D6	5-3 exoribonuclease 2	XRN2	tr|B4E0B9|B4E0B9_HUMAN 5-3 exoribonuclease OS=Homo sapiens OX=9606 PE=2 SV=1;tr|B4DZC3|B4DZC3_HUMAN 5-3 exoribonuclease OS=Homo sapiens OX=9606 PE=2 SV=1;tr|B3KMC9|B3KMC9_HUMAN 5-3 exoribonuclease OS=Homo sapiens OX=9606 PE=2 SV=1;sp|Q9H0D6-2|XRN2_HU	-22.8964	0.745153
298	A0A024R5M3;Q53HG7;Q14247-3;Q14247;Q14247-2;Q76MU0;B3KRK4;B4E358;H0YEV2;H0YCD9	Src substrate cortactin	CTTN;EMS1	tr|A0A024R5M3|A0A024R5M3_HUMAN Cortactin, isoform CRA_c OS=Homo sapiens OX=9606 GN=CTTN PE=4 SV=1;tr|Q53HG7|Q53HG7_HUMAN Cortactin isoform a variant (Fragment) OS=Homo sapiens OX=9606 PE=2 SV=1;sp|Q14247-3|SRC8_HUMAN Isoform 3 of Src substrate cortactin OS	-22.9688	1.2598
101	A0A024R0Q5;Q8WUF5;Q6ZNZ8;K7EN03;A7YME7;K7EPP1	RelA-associated inhibitor	PPP1R13L	tr|A0A024R0Q5|A0A024R0Q5_HUMAN Protein phosphatase 1, regulatory (Inhibitor) subunit 13 like, isoform CRA_a OS=Homo sapiens OX=9606 GN=PPP1R13L PE=4 SV=1;sp|Q8WUF5|IASPP_HUMAN RelA-associated inhibitor OS=Homo sapiens OX=9606 GN=PPP1R13L PE=1 SV=4;tr|Q6ZNZ	-22.9881	0.941449
2137	O15371-2;O15371-3;O15371;B4E1K8;B0QYA5;B0QYA4;B0QYA6;B0QYA8	Eukaryotic translation initiation factor 3 subunit D	EIF3D	sp|O15371-2|EIF3D_HUMAN Isoform 2 of Eukaryotic translation initiation factor 3 subunit D OS=Homo sapiens OX=9606 GN=EIF3D;sp|O15371-3|EIF3D_HUMAN Isoform 3 of Eukaryotic translation initiation factor 3 subunit D OS=Homo sapiens OX=9606 GN=EIF3D;sp|O15371|	-23.0077	1.30704
2002	H7BY36		EWSR1	tr|H7BY36|H7BY36_HUMAN RNA-binding protein EWS (Fragment) OS=Homo sapiens OX=9606 GN=EWSR1 PE=1 SV=1	-23.0133	1.69905
691	K7ES69;A0A087X271;B4DDF4;B2RWM5;Q6FHE4;Q6FHC3;Q53GK7;B4DUT8;Q99439-2;Q99439;B4DN57;H3BVI6;B4DHU5;A0A087WV51;H3BQH0;A0A087X1X5;Q15417-3;Q15417	Calponin;Calponin-2	CNN2	tr|K7ES69|K7ES69_HUMAN Calponin-2 OS=Homo sapiens OX=9606 GN=CNN2 PE=1 SV=1;tr|A0A087X271|A0A087X271_HUMAN Calponin (Fragment) OS=Homo sapiens OX=9606 GN=CNN2 PE=1 SV=1;tr|B4DDF4|B4DDF4_HUMAN Calponin OS=Homo sapiens OX=9606 GN=CNN2 PE=1 SV=1;tr|B2RWM5|B2R	-23.0579	1.18574
2604	P83369	U7 snRNA-associated Sm-like protein LSm11	LSM11	sp|P83369|LSM11_HUMAN U7 snRNA-associated Sm-like protein LSm11 OS=Homo sapiens OX=9606 GN=LSM11 PE=1 SV=2	-23.167	2.20165
2713	Q14694;Q14694-3;Q14694-2;Q6P2I0;H3BQP1;H3BQC6;J3KT19;H3BNS8;H3BNA1;H3BVF1;B4DDR4	Ubiquitin carboxyl-terminal hydrolase 10	USP10	sp|Q14694|UBP10_HUMAN Ubiquitin carboxyl-terminal hydrolase 10 OS=Homo sapiens OX=9606 GN=USP10 PE=1 SV=2;sp|Q14694-3|UBP10_HUMAN Isoform 3 of Ubiquitin carboxyl-terminal hydrolase 10 OS=Homo sapiens OX=9606 GN=USP10;sp|Q14694-2|UBP10_HUMAN Isoform 2 of Ub	-23.2104	0.921069
490	A0A024RAV4;A0A024RAQ1;P16989-2;P16989-3;P16989;Q59EB5;Q96GD7;A0A0D9SEI8	Y-box-binding protein 3	CSDA;YBX3	tr|A0A024RAV4|A0A024RAV4_HUMAN Cold shock domain protein A, isoform CRA_b OS=Homo sapiens OX=9606 GN=CSDA PE=4 SV=1;tr|A0A024RAQ1|A0A024RAQ1_HUMAN Cold shock domain protein A, isoform CRA_a OS=Homo sapiens OX=9606 GN=CSDA PE=4 SV=1;sp|P16989-2|YBOX3_HUMAN	-23.2368	1.11044
1080	B3KSG3;A0A2Z4N5U1;O14639-3;O14639-5;O14639-4;O14639-2;O14639-6;O14639;B4DQA3;J3QSX6;F8W8M4;A0A0A0MRL6;B7Z4H1;H0Y7N6;F6XFR5	Actin-binding LIM protein 1	ABLIM1	tr|B3KSG3|B3KSG3_HUMAN cDNA FLJ36152 fis, clone TESTI2025403, highly similar to Actin-binding LIM protein 1 OS=Homo sapiens OX=9606 PE=2 SV=1;tr|A0A2Z4N5U1|A0A2Z4N5U1_HUMAN AbLIM1 OS=Homo sapiens OX=9606 PE=2 SV=1;sp|O14639-3|ABLM1_HUMAN Isoform 3 of Actin	-23.2421	1.2099
1896	E9PMH5;B2R8N8;Q13490-2;Q13490;A0A087X2B2;Q8IZZ0;E9PIW1;H0YDY3;E9PI77;E9PNM6;Q13489;E9PQZ9	Baculoviral IAP repeat-containing protein 2	BIRC2	tr|E9PMH5|E9PMH5_HUMAN Baculoviral IAP repeat-containing protein 2 OS=Homo sapiens OX=9606 GN=BIRC2 PE=1 SV=1;tr|B2R8N8|B2R8N8_HUMAN cDNA, FLJ93988, highly similar to Homo sapiens baculoviral IAP repeat-containing 2 (BIRC2), mRNA OS=Homo sapiens OX=9606 PE	-23.2683	1.36739
3267	Q9NQG5;A2A2M0	Regulation of nuclear pre-mRNA domain-containing protein 1B	RPRD1B	sp|Q9NQG5|RPR1B_HUMAN Regulation of nuclear pre-mRNA domain-containing protein 1B OS=Homo sapiens OX=9606 GN=RPRD1B PE=1 SV=1	-23.2879	1.59869
1296	B4DEE4;B4DUE7;A8KAI0;O43791;B4E088;D6RDG8;D6RDV6	Speckle-type POZ protein	SPOP	tr|B4DEE4|B4DEE4_HUMAN cDNA FLJ53827, highly similar to Speckle-type POZ protein OS=Homo sapiens OX=9606 PE=2 SV=1;tr|B4DUE7|B4DUE7_HUMAN cDNA FLJ51096, highly similar to Speckle-type POZ protein OS=Homo sapiens OX=9606 PE=2 SV=1;tr|A8KAI0|A8KAI0_HUMAN cDN	-23.3192	0.828764
1167	A7MD96;Q8N3V7-2;B3KXB8;Q8N3V7-3;Q8N3V7	Synaptopodin	SYNPO	tr|A7MD96|A7MD96_HUMAN SYNPO protein (Fragment) OS=Homo sapiens OX=9606 GN=SYNPO PE=2 SV=1;sp|Q8N3V7-2|SYNPO_HUMAN Isoform 2 of Synaptopodin OS=Homo sapiens OX=9606 GN=SYNPO;tr|B3KXB8|B3KXB8_HUMAN cDNA FLJ45106 fis, clone BRAWH3033293, highly similar to Sy	-23.3393	0.86861
2877	Q5VUA4;Q5VUA4-2	Zinc finger protein 318	ZNF318	sp|Q5VUA4|ZN318_HUMAN Zinc finger protein 318 OS=Homo sapiens OX=9606 GN=ZNF318 PE=1 SV=2;sp|Q5VUA4-2|ZN318_HUMAN Isoform 2 of Zinc finger protein 318 OS=Homo sapiens OX=9606 GN=ZNF318	-23.3588	0.945001
1507	B4DUD5;E7EWR4;B3V096;P33240-2;P33240;E9PID8;A0A0A0MT56;Q9H0L4	Cleavage stimulation factor subunit 2;Cleavage stimulation factor subunit 2 tau variant	CSTF2;CSTF2T	tr|B4DUD5|B4DUD5_HUMAN cDNA FLJ58787, highly similar to Cleavage stimulation factor 64 kDa subunit OS=Homo sapiens OX=9606 PE=2 SV=1;tr|E7EWR4|E7EWR4_HUMAN Cleavage stimulation factor subunit 2 OS=Homo sapiens OX=9606 GN=CSTF2 PE=1 SV=1;tr|B3V096|B3V096_HU	-23.3752	0.904789
3101	Q92576-2;Q92576;E7ER40;B4DQ09;E7EVH3;H0Y8L0;B0AZS7;E9PE34;A0A1B0GX99;B3KP41;A8K376;D6R9X2	PHD finger protein 3	PHF3	sp|Q92576-2|PHF3_HUMAN Isoform 2 of PHD finger protein 3 OS=Homo sapiens OX=9606 GN=PHF3;sp|Q92576|PHF3_HUMAN PHD finger protein 3 OS=Homo sapiens OX=9606 GN=PHF3 PE=1 SV=3;tr|E7ER40|E7ER40_HUMAN PHD finger protein 3 (Fragment) OS=Homo sapiens OX=9606 GN=P	-23.3784	1.64525
3324	Q9P1T7;H7C4B9;H7BZY3;J3KN13;A0A087X231;Q9P1T7-1;C9J104;C9J784	MyoD family inhibitor domain-containing protein	MDFIC	sp|Q9P1T7|MDFIC_HUMAN MyoD family inhibitor domain-containing protein OS=Homo sapiens OX=9606 GN=MDFIC PE=1 SV=2;tr|H7C4B9|H7C4B9_HUMAN MyoD family inhibitor domain-containing protein (Fragment) OS=Homo sapiens OX=9606 GN=MDFIC PE=1 SV=1;tr|H7BZY3|H7BZY3_H	-23.432	1.15399
246	A0A024R4A5;Q6Y7W6-4;Q6Y7W6-5;Q6Y7W6;I1E4Y6;Q6Y7W6-3;E7ESB6;C9JHW1;B4DRT8;F8WCD5;C9JPV7;C9JXQ0;C9J0V6;C9JHT0;C9JRZ2;B4DLU7;B4DZM1;C9JW88;C9JH18	PERQ amino acid-rich with GYF domain-containing protein 2	TNRC15;GIGYF2	tr|A0A024R4A5|A0A024R4A5_HUMAN Trinucleotide repeat containing 15, isoform CRA_a OS=Homo sapiens OX=9606 GN=TNRC15 PE=4 SV=1;sp|Q6Y7W6-4|GGYF2_HUMAN Isoform 3 of GRB10-interacting GYF protein 2 OS=Homo sapiens OX=9606 GN=GIGYF2;sp|Q6Y7W6-5|GGYF2_HUMAN Isof	-23.4449	0.661871
2189	O75319;H7C0E6;O75319-2	RNA/RNP complex-1-interacting phosphatase	DUSP11	sp|O75319|DUS11_HUMAN RNA/RNP complex-1-interacting phosphatase OS=Homo sapiens OX=9606 GN=DUSP11 PE=1 SV=2;tr|H7C0E6|H7C0E6_HUMAN RNA/RNP complex-1-interacting phosphatase (Fragment) OS=Homo sapiens OX=9606 GN=DUSP11 PE=1 SV=1;sp|O75319-2|DUS11_HUMAN Isof	-23.5449	1.04341
1665	B4E223;Q68D10-2;Q68D10;Q68D10-3	Protein SPT2 homolog	SPTY2D1	tr|B4E223|B4E223_HUMAN cDNA FLJ52075, moderately similar to Mus musculus SPT2, Suppressor of Ty, domain containing 1, mRNA OS=Homo sapiens OX=9606 PE=2 SV=1;sp|Q68D10-2|SPT2_HUMAN Isoform 2 of Protein SPT2 homolog OS=Homo sapiens OX=9606 GN=SPTY2D1;sp|Q68D	-23.5554	1.20675
126	A8K4N2;A0A024R1C2;O95985;O95985-3;O95985-2;H0Y6W0;B4E3G2;H7C4B0;C9JEI7;B3KU89;C9JKE2;C9JT00;F2Z2A5;B4E3E0;C9JEQ1;C9J9X4;C9JF56;C9JTQ7;C9JHR0;Q13472-3;Q13472-2;Q13472	DNA topoisomerase;DNA topoisomerase 3-beta-1	TOP3B	tr|A8K4N2|A8K4N2_HUMAN DNA topoisomerase OS=Homo sapiens OX=9606 PE=2 SV=1;tr|A0A024R1C2|A0A024R1C2_HUMAN DNA topoisomerase OS=Homo sapiens OX=9606 GN=TOP3B PE=3 SV=1;sp|O95985|TOP3B_HUMAN DNA topoisomerase 3-beta-1 OS=Homo sapiens OX=9606 GN=TOP3B PE=1 SV	-23.7077	2.06984
2159	O43474-4;O43474-1;O43474	Krueppel-like factor 4	KLF4	sp|O43474-4|KLF4_HUMAN Isoform 3 of Krueppel-like factor 4 OS=Homo sapiens OX=9606 GN=KLF4;sp|O43474-1|KLF4_HUMAN Isoform 2 of Krueppel-like factor 4 OS=Homo sapiens OX=9606 GN=KLF4;sp|O43474|KLF4_HUMAN Krueppel-like factor 4 OS=Homo sapiens OX=9606 GN=KLF	-23.7486	0.703564
610	A0A024RDY6;O95409;B4DP89;C9JD04;B3KPI4;Q8N9L1-2;Q8N9L1;Q8N9L1-5;Q8N9L1-3;Q15915;O60481-2;O60481;Q96T25	Zinc finger protein ZIC 2	ZIC2	tr|A0A024RDY6|A0A024RDY6_HUMAN Zic family member 2 (Odd-paired homolog, Drosophila), isoform CRA_a OS=Homo sapiens OX=9606 GN=ZIC2 PE=4 SV=1;sp|O95409|ZIC2_HUMAN Zinc finger protein ZIC 2 OS=Homo sapiens OX=9606 GN=ZIC2 PE=1 SV=2;tr|B4DP89|B4DP89_HUMAN cDN	-23.7657	0.866147
2822	Q58FG0	Putative heat shock protein HSP 90-alpha A5	HSP90AA5P	sp|Q58FG0|HS905_HUMAN Putative heat shock protein HSP 90-alpha A5 OS=Homo sapiens OX=9606 GN=HSP90AA5P PE=2 SV=1	-23.8147	1.0635
2944	Q6ZUT6;Q6ZUT6-4;Q6ZUT6-2;H0YM82;Q6ZUT6-3;H0YK65	Uncharacterized protein C15orf52	C15orf52	sp|Q6ZUT6|CCD9B_HUMAN Coiled-coil domain-containing protein 9B OS=Homo sapiens OX=9606 GN=CCDC9B PE=1 SV=1;sp|Q6ZUT6-4|CCD9B_HUMAN Isoform 4 of Coiled-coil domain-containing protein 9B OS=Homo sapiens OX=9606 GN=CCDC9B;sp|Q6ZUT6-2|CCD9B_HUMAN Isoform 2 of	-23.9733	1.89923
2617	Q02930-2;Q02930;Q02930-3;H9KVC5;Q59G47;Q02930-4	Cyclic AMP-responsive element-binding protein 5	CREB5	sp|Q02930-2|CREB5_HUMAN Isoform 2 of Cyclic AMP-responsive element-binding protein 5 OS=Homo sapiens OX=9606 GN=CREB5;sp|Q02930|CREB5_HUMAN Cyclic AMP-responsive element-binding protein 5 OS=Homo sapiens OX=9606 GN=CREB5 PE=1 SV=3;sp|Q02930-3|CREB5_HUMAN I	-24.0336	1.07954
93	A0A024R0J1;O96013;A8K724;O96013-4;A0A024R0L8;O96013-2;O96013-3;B4DE88;M0R2X4;M0R0L9;B4E3B5;M0R3G6;B4DUG0;M0R1R1;B3KTJ2;A0A024R9Q4;B0AZM9;Q9NQU5-2;Q9NQU5;Q9P286	Non-specific serine/threonine protein kinase;Serine/threonine-protein kinase PAK 4	PAK4	tr|A0A024R0J1|A0A024R0J1_HUMAN Non-specific serine/threonine protein kinase OS=Homo sapiens OX=9606 GN=PAK4 PE=4 SV=1;sp|O96013|PAK4_HUMAN Serine/threonine-protein kinase PAK 4 OS=Homo sapiens OX=9606 GN=PAK4 PE=1 SV=1;tr|A8K724|A8K724_HUMAN Non-specific s	-24.0469	0.924728
2520	P56270-3;P56270;I3L2Z5;A0A087WWR2;Q8WZ46;H3BQS2;P56270-4;H3BPU3;H3BQI4;I3L411;Q9UJ31;I3L4Y2;Q59GP8;Q9HD72;J3QSH4;A8K6Y8;A0A024R1H7;A0A024R1F8;Q59HH1;A0A024R1M5;Q14119;Q9HBE1-4;Q9HBE1-2;Q9HBE1-3;Q9HBE1	Myc-associated zinc finger protein	MAZ	sp|P56270-3|MAZ_HUMAN Isoform 3 of Myc-associated zinc finger protein OS=Homo sapiens OX=9606 GN=MAZ;sp|P56270|MAZ_HUMAN Myc-associated zinc finger protein OS=Homo sapiens OX=9606 GN=MAZ PE=1 SV=1;tr|I3L2Z5|I3L2Z5_HUMAN Myc-associated zinc finger protein (	-24.0646	1.04719
528	G5E972;A0A024RBE7;P42167;A0A024RBH7;P42167-2;Q59G12;H0YJH7;P42167-3;Q9P1N8	Lamina-associated polypeptide 2, isoforms beta/gamma;Thymopoietin;Thymopentin	TMPO	tr|G5E972|G5E972_HUMAN Lamina-associated polypeptide 2, isoforms beta/gamma OS=Homo sapiens OX=9606 GN=TMPO PE=1 SV=1;tr|A0A024RBE7|A0A024RBE7_HUMAN Thymopoietin, isoform CRA_c OS=Homo sapiens OX=9606 GN=TMPO PE=4 SV=1;sp|P42167|LAP2B_HUMAN Lamina-associat	-24.1145	1.32753
3311	Q9P031;F8VNY5	Thyroid transcription factor 1-associated protein 26	CCDC59	sp|Q9P031|TAP26_HUMAN Thyroid transcription factor 1-associated protein 26 OS=Homo sapiens OX=9606 GN=CCDC59 PE=1 SV=2;tr|F8VNY5|F8VNY5_HUMAN Thyroid transcription factor 1-associated protein 26 (Fragment) OS=Homo sapiens OX=9606 GN=CCDC59 PE=1 SV=1	-24.1184	1.18307
2839	Q5JVS0;Q5JVS0-2;B3KRA3;B3KNW5	Intracellular hyaluronan-binding protein 4	HABP4	sp|Q5JVS0|HABP4_HUMAN Intracellular hyaluronan-binding protein 4 OS=Homo sapiens OX=9606 GN=HABP4 PE=1 SV=1;sp|Q5JVS0-2|HABP4_HUMAN Isoform 2 of Intracellular hyaluronan-binding protein 4 OS=Homo sapiens OX=9606 GN=HABP4	-24.2832	0.678621
2067	K7ELG9;Q3MHD2;Q3MHD2-2;B4DUG4	Protein LSM12 homolog	LSM12	tr|K7ELG9|K7ELG9_HUMAN Protein LSM12 homolog OS=Homo sapiens OX=9606 GN=LSM12 PE=1 SV=1;sp|Q3MHD2|LSM12_HUMAN Protein LSM12 homolog OS=Homo sapiens OX=9606 GN=LSM12 PE=1 SV=2;sp|Q3MHD2-2|LSM12_HUMAN Isoform 2 of Protein LSM12 homolog OS=Homo sapiens OX=960	-24.2905	1.03512
2776	Q2VIN3;Q96E39;A0A1B0GUK8	RNA binding motif protein, X-linked-like-1	RBMXL1	tr|Q2VIN3|Q2VIN3_HUMAN RBM1 (Fragment) OS=Homo sapiens OX=9606 PE=4 SV=1;sp|Q96E39|RMXL1_HUMAN RNA binding motif protein, X-linked-like-1 OS=Homo sapiens OX=9606 GN=RBMXL1 PE=1 SV=1	-24.4751	1.18378
265	A0A024R4R9;Q96PV6;C9JMY0;A0A087WUE4;Q96PV6-1;A0A0G2JNN3;E7EWC7;Q96PV6-3;B0VJY8;H7BZP5;A0A0G2JPW6	Leukocyte receptor cluster member 8	LENG8	tr|A0A024R4R9|A0A024R4R9_HUMAN Leukocyte receptor cluster (LRC) member 8, isoform CRA_a OS=Homo sapiens OX=9606 GN=LENG8 PE=4 SV=1;sp|Q96PV6|LENG8_HUMAN Leukocyte receptor cluster member 8 OS=Homo sapiens OX=9606 GN=LENG8 PE=1 SV=3;tr|C9JMY0|C9JMY0_HUMAN L	-24.4851	1.53777
3274	Q9NR56-3;Q9NR56-4;Q9NR56-6;Q9NR56-2;Q9NR56-5;H7C4T5;B4DLS5	Muscleblind-like protein 1	MBNL1	sp|Q9NR56-3|MBNL1_HUMAN Isoform 3 of Muscleblind-like protein 1 OS=Homo sapiens OX=9606 GN=MBNL1;sp|Q9NR56-4|MBNL1_HUMAN Isoform 4 of Muscleblind-like protein 1 OS=Homo sapiens OX=9606 GN=MBNL1;sp|Q9NR56-6|MBNL1_HUMAN Isoform 6 of Muscleblind-like protein	-24.538	1.69748
3144	Q96GY0;B2R9B8;H0YAP0	Zinc finger C2HC domain-containing protein 1A	ZC2HC1A	sp|Q96GY0|ZC21A_HUMAN Zinc finger C2HC domain-containing protein 1A OS=Homo sapiens OX=9606 GN=ZC2HC1A PE=1 SV=2;tr|B2R9B8|B2R9B8_HUMAN cDNA, FLJ94320 OS=Homo sapiens OX=9606 PE=2 SV=1;tr|H0YAP0|H0YAP0_HUMAN Zinc finger C2HC domain-containing protein 1A (F	-24.5866	0.945035
3245	Q9H7E2-3;A0A024QZE0;Q9H7E2;Q9H7E2-2;B1AMN9;F2Z2Y2	Tudor domain-containing protein 3	TDRD3	sp|Q9H7E2-3|TDRD3_HUMAN Isoform 3 of Tudor domain-containing protein 3 OS=Homo sapiens OX=9606 GN=TDRD3;tr|A0A024QZE0|A0A024QZE0_HUMAN Tudor domain containing 3, isoform CRA_a OS=Homo sapiens OX=9606 GN=TDRD3 PE=4 SV=1;sp|Q9H7E2|TDRD3_HUMAN Tudor domain-co	-24.633	1.11259
3096	Q8WYQ5-3;Q8WYQ5;Q53GY5;Q8WYQ5-2;C9JSD5	Microprocessor complex subunit DGCR8	DGCR8	sp|Q8WYQ5-3|DGCR8_HUMAN Isoform 3 of Microprocessor complex subunit DGCR8 OS=Homo sapiens OX=9606 GN=DGCR8;sp|Q8WYQ5|DGCR8_HUMAN Microprocessor complex subunit DGCR8 OS=Homo sapiens OX=9606 GN=DGCR8 PE=1 SV=1;tr|Q53GY5|Q53GY5_HUMAN DiGeorge syndrome critic	-24.6522	1.37947
148	A8K1D2;A0A024R1S8;Q14847;C9J9W2;Q14847-2;F6S2S5;B4DIC4;B4DJI4;Q14847-3;J3KSN1;B7ZB56;O76041-2;Q59FZ8	LIM and SH3 domain protein 1	LASP1	tr|A8K1D2|A8K1D2_HUMAN cDNA FLJ76601, highly similar to Homo sapiens LIM and SH3 protein 1 (LASP1), mRNA OS=Homo sapiens OX=9606 PE=2 SV=1;tr|A0A024R1S8|A0A024R1S8_HUMAN LIM and SH3 protein 1, isoform CRA_b OS=Homo sapiens OX=9606 GN=LASP1 PE=4 SV=1;sp|Q14	-24.6639	1.49713
855	A0A0S2Z4V5;A0A0S2Z556;O60828-2;O60828;O60828-5;O60828-4;O60828-6;O60828-3;Q4VY28;H7C053;O60828-10;O60828-9;O60828-8;O60828-7	Polyglutamine-binding protein 1	PQBP1	tr|A0A0S2Z4V5|A0A0S2Z4V5_HUMAN Polyglutamine binding protein 1 isoform 1 (Fragment) OS=Homo sapiens OX=9606 GN=PQBP1 PE=2 SV=1;tr|A0A0S2Z556|A0A0S2Z556_HUMAN Polyglutamine binding protein 1 isoform 2 (Fragment) OS=Homo sapiens OX=9606 GN=PQBP1 PE=2 SV=1;sp	-24.8087	0.717782
3260	Q9HC52;C9J6K3;C9JM54;B3KT27;B0QXZ6;O95503	Chromobox protein homolog 8	CBX8	sp|Q9HC52|CBX8_HUMAN Chromobox protein homolog 8 OS=Homo sapiens OX=9606 GN=CBX8 PE=1 SV=3;tr|C9J6K3|C9J6K3_HUMAN Chromobox protein homolog 8 (Fragment) OS=Homo sapiens OX=9606 GN=CBX8 PE=1 SV=1	-24.8318	1.30455
1892	E9PK91;Q9NYF8-3;E9PQN2;E9PKI6;E9PK09;Q6DCA8;A0A1W2PQ43;E9PJA7;H0YF63;B7Z8J9;H0YF00	Bcl-2-associated transcription factor 1	BCLAF1	tr|E9PK91|E9PK91_HUMAN Bcl-2-associated transcription factor 1 OS=Homo sapiens OX=9606 GN=BCLAF1 PE=1 SV=1;sp|Q9NYF8-3|BCLF1_HUMAN Isoform 3 of Bcl-2-associated transcription factor 1 OS=Homo sapiens OX=9606 GN=BCLAF1;tr|E9PQN2|E9PQN2_HUMAN Bcl-2-associate	-24.9217	0.987586
581	A0A024RD78;Q6P1L8	39S ribosomal protein L14, mitochondrial	MRPL14	tr|A0A024RD78|A0A024RD78_HUMAN Mitochondrial ribosomal protein L14, isoform CRA_b OS=Homo sapiens OX=9606 GN=MRPL14 PE=3 SV=1;sp|Q6P1L8|RM14_HUMAN 39S ribosomal protein L14, mitochondrial OS=Homo sapiens OX=9606 GN=MRPL14 PE=1 SV=1	-24.9365	0.986845
1579	B4E013;B4DND9;Q7L4X7;Q96CS0;Q53YP0;B4E1N4;Q9NZM5;B4DVK1;M0QX73;M0QZ34	Glioma tumor suppressor candidate region gene 2 protein	GLTSCR2	tr|B4E013|B4E013_HUMAN cDNA FLJ57014, highly similar to Glioma tumor suppressor candidate region gene 2 protein OS=Homo sapiens OX=9606 PE=2 SV=1;tr|B4DND9|B4DND9_HUMAN Ribosome biogenesis protein NOP53 OS=Homo sapiens OX=9606 PE=2 SV=1;tr|Q7L4X7|Q7L4X7_HU	-24.9451	1.74069
267	Q53F81;A0A024R4S5;Q8N0Y2;A0A024R4P4;Q8N0Y2-2;K7EK55;K7EMV5;K7ELZ3;K7ESL2;K7EJH4;K7EJ91	Zinc finger protein 444	ZNF444	tr|Q53F81|Q53F81_HUMAN Zinc finger protein 444 variant (Fragment) OS=Homo sapiens OX=9606 PE=2 SV=1;tr|A0A024R4S5|A0A024R4S5_HUMAN Zinc finger protein 444, isoform CRA_b OS=Homo sapiens OX=9606 GN=ZNF444 PE=4 SV=1;sp|Q8N0Y2|ZN444_HUMAN Zinc finger protein	-25.0252	1.36869
3054	Q8NEY8;F8W6A0;B7Z8M9;F8W0Q9;Q8NEY8-9;Q8NEY8-8;Q8NEY8-2;Q8NEY8-3;F8WF16;B7Z8L1;B7Z695;Q8NEY8-6;B7Z615;Q8NEY8-5;Q8NEY8-7;F8VRK2;REV__K7EN69;F8VPY7;F8VWU8	Periphilin-1	PPHLN1	sp|Q8NEY8|PPHLN_HUMAN Periphilin-1 OS=Homo sapiens OX=9606 GN=PPHLN1 PE=1 SV=2;tr|F8W6A0|F8W6A0_HUMAN Periphilin-1 OS=Homo sapiens OX=9606 GN=PPHLN1 PE=1 SV=1;tr|B7Z8M9|B7Z8M9_HUMAN cDNA FLJ58824, highly similar to Periphilin-1 OS=Homo sapiens OX=9606 PE=2	-25.1043	1.03475
2215	O94875-11;O94875-9;O94875;B7Z997;O94875-7;B7Z3D7;H7BZK1;H7BZX1;O94875-6;Q96RE2;C9J3W4;C9JL62;C9IZ89;C9J4K2;C9J7Q5;C9JI79;C9IZT7;C9JBR8;C9J9D3;C9JBB0;C9JZ60;C9J372;C9JEA9;C9J4Z9;C9JN77;C9JDX2;C9JG84;C9J348;C9JWC3	Sorbin and SH3 domain-containing protein 2	SORBS2	sp|O94875-11|SRBS2_HUMAN Isoform 11 of Sorbin and SH3 domain-containing protein 2 OS=Homo sapiens OX=9606 GN=SORBS2;sp|O94875-9|SRBS2_HUMAN Isoform 9 of Sorbin and SH3 domain-containing protein 2 OS=Homo sapiens OX=9606 GN=SORBS2;sp|O94875|SRBS2_HUMAN Sorb	-25.1181	0.933856
3268	Q9NQS1;H0YKR0	Cell death regulator Aven	AVEN	sp|Q9NQS1|AVEN_HUMAN Cell death regulator Aven OS=Homo sapiens OX=9606 GN=AVEN PE=1 SV=1	-25.1901	0.944605
1127	A4D1W6;Q8TAP9	M-phase-specific PLK1-interacting protein	C7orf11;MPLKIP	tr|A4D1W6|A4D1W6_HUMAN Chromosome 7 open reading frame 11 OS=Homo sapiens OX=9606 GN=C7orf11 PE=2 SV=1;sp|Q8TAP9|MPLKI_HUMAN M-phase-specific PLK1-interacting protein OS=Homo sapiens OX=9606 GN=MPLKIP PE=1 SV=1	-25.2711	0.906026
3032	Q8N726;Q5ZEY9;K4HYZ8;K4HSH7;Q8N726-2	Tumor suppressor ARF	CDKN2A	sp|Q8N726|ARF_HUMAN Tumor suppressor ARF OS=Homo sapiens OX=9606 GN=CDKN2A PE=1 SV=2;tr|Q5ZEY9|Q5ZEY9_HUMAN Cyclin-dependent kinase inhibitor 2A (Fragment) OS=Homo sapiens OX=9606 GN=CDKN2A PE=4 SV=1;tr|K4HYZ8|K4HYZ8_HUMAN p14ARF/FAM230A fusion protein tra	-25.2764	2.7091
3111	Q92989;E9PL17;Q92989-2;E9PJM4;E9PKV5	Polyribonucleotide 5-hydroxyl-kinase Clp1	CLP1	sp|Q92989|CLP1_HUMAN Polyribonucleotide 5-hydroxyl-kinase Clp1 OS=Homo sapiens OX=9606 GN=CLP1 PE=1 SV=1;tr|E9PL17|E9PL17_HUMAN Polyribonucleotide 5-hydroxyl-kinase Clp1 OS=Homo sapiens OX=9606 GN=CLP1 PE=1 SV=1;sp|Q92989-2|CLP1_HUMAN Isoform 2 of Polyri	-25.3098	1.15659
2653	Q12872;Q12872-2;Q8IV81;Q59H38;F5H1A5;H0YFR9;B4DHK4;A5PLM7	Splicing factor, suppressor of white-apricot homolog	SFSWAP;SFRS8	sp|Q12872|SFSWA_HUMAN Splicing factor, suppressor of white-apricot homolog OS=Homo sapiens OX=9606 GN=SFSWAP PE=1 SV=3;sp|Q12872-2|SFSWA_HUMAN Isoform 2 of Splicing factor, suppressor of white-apricot homolog OS=Homo sapiens OX=9606 GN=SFSWAP;tr|Q8IV81|Q8I	-25.3197	1.24491
2018	I3L0U5;H6QX63;Q6PK04;I3L4F6	Coiled-coil domain-containing protein 137	CCDC137	tr|I3L0U5|I3L0U5_HUMAN Coiled-coil domain-containing protein 137 (Fragment) OS=Homo sapiens OX=9606 GN=CCDC137 PE=1 SV=1;tr|H6QX63|H6QX63_HUMAN Hepatocellular carcinoma related protein 2 OS=Homo sapiens OX=9606 PE=2 SV=1;sp|Q6PK04|CC137_HUMAN Coiled-coil d	-25.7099	1.14287
1877	E9PB61		ALYREF	tr|E9PB61|E9PB61_HUMAN THO complex subunit 4 OS=Homo sapiens OX=9606 GN=ALYREF PE=1 SV=1	-25.7744	1.32222
3035	Q8NAF0	Zinc finger protein 579	ZNF579	sp|Q8NAF0|ZN579_HUMAN Zinc finger protein 579 OS=Homo sapiens OX=9606 GN=ZNF579 PE=1 SV=2	-25.8743	1.70147
672	A0A087WZ13;E9PAU2;Q8IY67-2;K7EQG2;Q8IY67;K7EKR9;Q8IY67-3	Ribonucleoprotein PTB-binding 1	RAVER1	tr|A0A087WZ13|A0A087WZ13_HUMAN Ribonucleoprotein PTB-binding 1 OS=Homo sapiens OX=9606 GN=RAVER1 PE=1 SV=1;tr|E9PAU2|E9PAU2_HUMAN Ribonucleoprotein PTB-binding 1 OS=Homo sapiens OX=9606 GN=RAVER1 PE=1 SV=1;sp|Q8IY67-2|RAVR1_HUMAN Isoform 2 of Ribonucleopro	-25.9904	1.06019
2083	L0R4W3;P0CG12	Chromosome transmission fidelity protein 8 homolog isoform 2	CHTF8	tr|L0R4W3|L0R4W3_HUMAN Alternative protein CHTF8 OS=Homo sapiens OX=9606 GN=CHTF8 PE=4 SV=1;sp|P0CG12|CTF8A_HUMAN Chromosome transmission fidelity protein 8 homolog isoform 2 OS=Homo sapiens OX=9606 GN=CHTF8 PE=1 SV=1	-26.2425	0.859033
1284	A8K9L2;Q86Y07-5;Q05CR6;Q86Y07-4;Q86Y07-2;Q86Y07-3;Q86Y07	Serine/threonine-protein kinase VRK2	VRK2	tr|A8K9L2|A8K9L2_HUMAN cDNA FLJ76729, highly similar to Homo sapiens vaccinia related kinase 2 isoform 6 (VRK2) mRNA OS=Homo sapiens OX=9606 PE=2 SV=1;sp|Q86Y07-5|VRK2_HUMAN Isoform 5 of Serine/threonine-protein kinase VRK2 OS=Homo sapiens OX=9606 GN=VRK2;	-26.2604	0.60708
576	A0A024RCX8;Q9Y3C6	Peptidyl-prolyl cis-trans isomerase;Peptidyl-prolyl cis-trans isomerase-like 1	PPIL1	tr|A0A024RCX8|A0A024RCX8_HUMAN Peptidyl-prolyl cis-trans isomerase OS=Homo sapiens OX=9606 GN=PPIL1 PE=3 SV=1;sp|Q9Y3C6|PPIL1_HUMAN Peptidyl-prolyl cis-trans isomerase-like 1 OS=Homo sapiens OX=9606 GN=PPIL1 PE=1 SV=1	-26.3967	2.14621
1355	B2R704;Q14244;Q14244-6;Q14244-7;B7ZB64;A0A087WZ40;Q14244-3;B7Z3Y3;Q14244-5;Q14244-2;B7Z3E1;Q14244-4	Ensconsin	MAP7	tr|B2R704|B2R704_HUMAN cDNA, FLJ93207, highly similar to Homo sapiens microtubule-associated protein 7 (MAP7), mRNA OS=Homo sapiens OX=9606 PE=2 SV=1;sp|Q14244|MAP7_HUMAN Ensconsin OS=Homo sapiens OX=9606 GN=MAP7 PE=1 SV=1;sp|Q14244-6|MAP7_HUMAN Isoform 6	-26.4624	1.04956
3208	Q9BY77;F6VRR5;B4E0L0;Q96DI9;Q9BY77-2;F8WCX5;B4DMM2;Q659C6;Q8WUT1;B4DSH9;Q6R954;F8WEE2	Polymerase delta-interacting protein 3	POLDIP3	sp|Q9BY77|PDIP3_HUMAN Polymerase delta-interacting protein 3 OS=Homo sapiens OX=9606 GN=POLDIP3 PE=1 SV=2;tr|F6VRR5|F6VRR5_HUMAN Polymerase delta-interacting protein 3 OS=Homo sapiens OX=9606 GN=POLDIP3 PE=1 SV=1;tr|B4E0L0|B4E0L0_HUMAN cDNA FLJ54030, highl	-26.9737	2.08565
2594	P79522-2;B3KQA4;Q96QB9;A0A1U9X8D4;A6NDA2;P79522	Proline-rich protein 3	PRR3;CAT56	sp|P79522-2|PRR3_HUMAN Isoform 2 of Proline-rich protein 3 OS=Homo sapiens OX=9606 GN=PRR3;tr|B3KQA4|B3KQA4_HUMAN cDNA FLJ90050 fis, clone HEMBA1002524, highly similar to Proline-rich protein 3 OS=Homo sapiens OX=9606 PE=2 SV=1;tr|Q96QB9|Q96QB9_HUMAN CAT56	-27.0742	0.756554
1192	B7ZLP5;A8K329;Q15424;Q15424-4;Q15424-3;B7Z2Z1;Q15424-2;B7Z5X3;B7Z1C7;B7Z2F6;B7Z959;K7EII0;B7Z2H3;K7ES42	Scaffold attachment factor B1	SAFB	tr|B7ZLP5|B7ZLP5_HUMAN SAFB protein OS=Homo sapiens OX=9606 GN=SAFB PE=2 SV=1;tr|A8K329|A8K329_HUMAN cDNA FLJ76656, highly similar to Homo sapiens scaffold attachment factor B (SAFB), mRNA OS=Homo sapiens OX=9606 PE=2 SV=1;sp|Q15424|SAFB1_HUMAN Scaffold at	-27.0805	1.18678
2214	O94842-3;O94842-2;O94842;B4DJ39;O15405-2;O15405;B4DYA1;H6UKR8;B4DQV8;G8YXX4;Q96NM4-3;Q96NM4;Q96NM4-4;Q96NM4-2;O94900;C9J919;C9JNL1	TOX high mobility group box family member 4	TOX4	sp|O94842-3|TOX4_HUMAN Isoform 3 of TOX high mobility group box family member 4 OS=Homo sapiens OX=9606 GN=TOX4;sp|O94842-2|TOX4_HUMAN Isoform 2 of TOX high mobility group box family member 4 OS=Homo sapiens OX=9606 GN=TOX4;sp|O94842|TOX4_HUMAN TOX high mo	-27.0808	1.56852
2478	P50238;K4DIB9;H3BRQ4	Cysteine-rich protein 1	CRIP1	sp|P50238|CRIP1_HUMAN Cysteine-rich protein 1 OS=Homo sapiens OX=9606 GN=CRIP1 PE=1 SV=3	-27.3973	0.885993
2007	H7C0N4;L0R8E5		SF1	tr|H7C0N4|H7C0N4_HUMAN Splicing factor 1 (Fragment) OS=Homo sapiens OX=9606 GN=SF1 PE=1 SV=1;tr|L0R8E5|L0R8E5_HUMAN Alternative protein SF1 OS=Homo sapiens OX=9606 GN=SF1 PE=4 SV=1	-27.4023	1.46725
3185	Q9BTC0;Q9BTC0-1;Q9BTC0-2;Q9BTC0-3	Death-inducer obliterator 1	DIDO1	sp|Q9BTC0|DIDO1_HUMAN Death-inducer obliterator 1 OS=Homo sapiens OX=9606 GN=DIDO1 PE=1 SV=5;sp|Q9BTC0-1|DIDO1_HUMAN Isoform 1 of Death-inducer obliterator 1 OS=Homo sapiens OX=9606 GN=DIDO1	-27.5748	2.53952
3327	Q9P2N5;D3DQF6;Q05DK9	RNA-binding protein 27	RBM27;POU4F3	sp|Q9P2N5|RBM27_HUMAN RNA-binding protein 27 OS=Homo sapiens OX=9606 GN=RBM27 PE=1 SV=2;tr|D3DQF6|D3DQF6_HUMAN POU domain, class 4, transcription factor 3, isoform CRA_a OS=Homo sapiens OX=9606 GN=POU4F3 PE=4 SV=1	-27.9142	1.17549
2969	Q7Z417;Q7Z417-2	Nuclear fragile X mental retardation-interacting protein 2	NUFIP2	sp|Q7Z417|NUFP2_HUMAN Nuclear fragile X mental retardation-interacting protein 2 OS=Homo sapiens OX=9606 GN=NUFIP2 PE=1 SV=1	-28.1975	1.2969
2030	I6L9E8;Q8NCA5-2;Q8NCA5;E9PH82;B4DY25;B3KTW4;Q05CT2;B4DT23;C9J3G8	Protein FAM98A	FAM98A	tr|I6L9E8|I6L9E8_HUMAN Family with sequence similarity 98, member A OS=Homo sapiens OX=9606 GN=FAM98A PE=2 SV=1;sp|Q8NCA5-2|FA98A_HUMAN Isoform 2 of Protein FAM98A OS=Homo sapiens OX=9606 GN=FAM98A;sp|Q8NCA5|FA98A_HUMAN Protein FAM98A OS=Homo sapiens OX=96	-28.3181	2.10108
3090	Q8WWM7;Q8WWM7-6;Q8WWM7-8;Q8WWM7-5;Q8WWM7-4;Q8WWM7-2;Q8WWM7-3;A0A024QZB7;A0A024QZC0;A0A024QZ91;H3BRB0;A0A0C4DGL7	Ataxin-2-like protein	ATXN2L	sp|Q8WWM7|ATX2L_HUMAN Ataxin-2-like protein OS=Homo sapiens OX=9606 GN=ATXN2L PE=1 SV=2;sp|Q8WWM7-6|ATX2L_HUMAN Isoform 6 of Ataxin-2-like protein OS=Homo sapiens OX=9606 GN=ATXN2L;sp|Q8WWM7-8|ATX2L_HUMAN Isoform 8 of Ataxin-2-like protein OS=Homo sapiens	-28.6812	1.34711
3405	Q9Y3Y2-4;Q9Y3Y2;Q9Y3Y2-3;X6R700;A0A087X1B7;Q5T7Y7	Chromatin target of PRMT1 protein	CHTOP	sp|Q9Y3Y2-4|CHTOP_HUMAN Isoform 3 of Chromatin target of PRMT1 protein OS=Homo sapiens OX=9606 GN=CHTOP;sp|Q9Y3Y2|CHTOP_HUMAN Chromatin target of PRMT1 protein OS=Homo sapiens OX=9606 GN=CHTOP PE=1 SV=2;sp|Q9Y3Y2-3|CHTOP_HUMAN Isoform 2 of Chromatin target	-29.4138	1.55872
1907	Q59FH1;H0Y4W2;F2Z2U4;Q9Y4A5-2;Q9Y4A5;A0A2R8YFJ4	Transformation/transcription domain-associated protein	TRRAP	tr|Q59FH1|Q59FH1_HUMAN Transformation/transcription domain-associated protein variant (Fragment) OS=Homo sapiens OX=9606 PE=2 SV=1;tr|H0Y4W2|H0Y4W2_HUMAN Transformation/transcription domain-associated protein (Fragment) OS=Homo sapiens OX=9606 GN=TRRAP PE=	13.5757	0.60206
1883	E9PHM6;F6QMI7;F8W9J4;Q03001-14;Q03001;Q03001-8;E7ETB9;B4DSS9;B4DGY0;Q03001-9;Q6P0N6;Q03001-3;A0A0U1RQJ2;Q03001-13;H0Y4F5;H0Y314;E7ESK0;E7ERX3;Q6IPG6;H0YC82;Q6ZQZ4;H0Y390;Q9UPN3-4;Q9UPN3-3;Q9UPN3-2;Q03001-10;H0YBX0;H0Y7I1;Q9H8U2;B4DNC4;Q9HDA7;Q9BSP9;Q86T18;H0YC65;Q32Q32;Q96IQ1;H0Y6T5	Dystonin	DST	tr|E9PHM6|E9PHM6_HUMAN Dystonin OS=Homo sapiens OX=9606 GN=DST PE=1 SV=3;tr|F6QMI7|F6QMI7_HUMAN Dystonin OS=Homo sapiens OX=9606 GN=DST PE=1 SV=2;tr|F8W9J4|F8W9J4_HUMAN Dystonin OS=Homo sapiens OX=9606 GN=DST PE=1 SV=1;sp|Q03001-14|DYST_HUMAN Isoform 9 of	-4.47774	1.0371
603	A0A024RDU0;Q9UL03-3;Q9UL03;C9JVX2;B4DL13;C9JXP6;C9J885;C9K0V7;F8WAV7;C9JAV7;B4E1J5;Q8N8M2;G5E9X1;B3KQH5;B9EIK3;A0A1W2PPI5;Q9UL03-2;Q5JSJ4	Integrator complex subunit 6	INTS6	tr|A0A024RDU0|A0A024RDU0_HUMAN Integrator complex subunit 6, isoform CRA_d OS=Homo sapiens OX=9606 GN=INTS6 PE=4 SV=1;sp|Q9UL03-3|INT6_HUMAN Isoform 3 of Integrator complex subunit 6 OS=Homo sapiens OX=9606 GN=INTS6;sp|Q9UL03|INT6_HUMAN Integrator complex	15.8639	0.60206
991	B4DK94;E9PH70;A0A1W2PPB7;Q9ULH0-3;Q9ULH0-4;Q9ULH0;Q9ULH0-2;B4DGY1;H0Y8E4;F8WAY8;G1UI41	Kinase D-interacting substrate of 220 kDa	KIDINS220	tr|B4DK94|B4DK94_HUMAN cDNA FLJ61593, highly similar to Homo sapiens kinase D-interacting substance of 220 kDa (KIDINS220), mRNA (Fragment) OS=Homo sapiens OX=9606 PE=2 SV=1;tr|E9PH70|E9PH70_HUMAN Kinase D-interacting substrate of 220 kDa (Fragment) OS=Hom	-0.341607	0.320491
1497	Q68DI5;F5H2T0;B3KXE7;B4E3I9;Q8N516;Q4LE38;O95163;B3KVS1;H0YDF3;B3KMT0;B3KNB2	Elongator complex protein 1	DKFZp781H1425;IKBKAP;IKBKAP variant protein	tr|Q68DI5|Q68DI5_HUMAN Uncharacterized protein DKFZp781H1425 OS=Homo sapiens OX=9606 GN=DKFZp781H1425 PE=2 SV=1;tr|F5H2T0|F5H2T0_HUMAN Elongator complex protein 1 OS=Homo sapiens OX=9606 GN=ELP1 PE=1 SV=1;tr|B3KXE7|B3KXE7_HUMAN cDNA FLJ45304 fis, clone BRH	16.3128	0.60206
3221	Q9H1A3-2	Methyltransferase-like protein 9	METTL9	sp|Q9H1A3-2|METL9_HUMAN Isoform 2 of Methyltransferase-like protein 9 OS=Homo sapiens OX=9606 GN=METTL9	-0.67579	0.332984
177	A0A024R2G2;Q9BXW9;Q9BXW9-1;H7BZJ7;Q9BXW9-3	Fanconi anemia group D2 protein	FANCD2	tr|A0A024R2G2|A0A024R2G2_HUMAN Fanconi anemia, complementation group D2, isoform CRA_b OS=Homo sapiens OX=9606 GN=FANCD2 PE=4 SV=1;sp|Q9BXW9|FACD2_HUMAN Fanconi anemia group D2 protein OS=Homo sapiens OX=9606 GN=FANCD2 PE=1 SV=2;sp|Q9BXW9-1|FACD2_HUMAN Iso	-1.98049	1.16002
654	A0A087WVT6;D6RAC5;Q9BT57;A4D1V8;Q9NW25		SSBP3	tr|A0A087WVT6|A0A087WVT6_HUMAN Single-stranded DNA-binding protein 3 OS=Homo sapiens OX=9606 GN=SSBP3 PE=1 SV=1	16.5188	0.60206
2051	J3QK89;B4DPM4;Q59ET1;B4DL82		CHERP	tr|J3QK89|J3QK89_HUMAN Calcium homeostasis endoplasmic reticulum protein OS=Homo sapiens OX=9606 GN=CHERP PE=1 SV=1	16.5339	0.60206
2681	Q13573;Q6I9S2;B7Z9X2;B4DY36;A0A024R6E3;G3V3A4;G3V4X8;B4DEG7;Q9ULA6;Q6P151;Q0D2M5;G3V5R3	SNW domain-containing protein 1	SNW1	sp|Q13573|SNW1_HUMAN SNW domain-containing protein 1 OS=Homo sapiens OX=9606 GN=SNW1 PE=1 SV=1;tr|Q6I9S2|Q6I9S2_HUMAN SNW1 protein OS=Homo sapiens OX=9606 GN=SNW1 PE=2 SV=1;tr|B7Z9X2|B7Z9X2_HUMAN cDNA, FLJ78986, highly similar to SNW domain-containing prot	-10.4684	1.09522
3003	Q8IWV7;A8K901;B4DYL2;A0A087WTJ9;Q8IWV7-2	E3 ubiquitin-protein ligase UBR1	UBR1	sp|Q8IWV7|UBR1_HUMAN E3 ubiquitin-protein ligase UBR1 OS=Homo sapiens OX=9606 GN=UBR1 PE=1 SV=1;tr|A8K901|A8K901_HUMAN cDNA FLJ77190, highly similar to Homo sapiens ubiquitin protein ligase E3 component n-recognin 1 (UBR1), mRNA (Fragment) OS=Homo sapiens	0.0739358	0.687881
1618	B4DU15;Q5T1Z4;Q5T1Z8;Q14671-2;Q14671-3;H0YDK8;B3KU37;E9PR38;H0YEH2;Q14671-4;Q14671;H0YDC5;H0YC97;D5HR47;D5HR46	Pumilio homolog 1	PUM1	tr|B4DU15|B4DU15_HUMAN cDNA FLJ54549, highly similar to Pumilio homolog 1 OS=Homo sapiens OX=9606 PE=2 SV=1;tr|Q5T1Z4|Q5T1Z4_HUMAN Pumilio homolog 1 (Drosophila), isoform CRA_b OS=Homo sapiens OX=9606 GN=PUM1 PE=1 SV=1;tr|Q5T1Z8|Q5T1Z8_HUMAN Pumilio homolo	-0.829239	0.924839
483	A0A024RAJ1;Q92552;Q92552-2;Q6PKB3;G5EA06;B4DT94;D6RH20;B4DKI9;Q8N6F2;E5RJ73;D6RJC7	28S ribosomal protein S27, mitochondrial	MRPS27	tr|A0A024RAJ1|A0A024RAJ1_HUMAN Mitochondrial ribosomal protein S27, isoform CRA_a OS=Homo sapiens OX=9606 GN=MRPS27 PE=4 SV=1;sp|Q92552|RT27_HUMAN 28S ribosomal protein S27, mitochondrial OS=Homo sapiens OX=9606 GN=MRPS27 PE=1 SV=3;sp|Q92552-2|RT27_HUMAN I	17.1749	0.60206
2039	J3KNL6;F1T0I1;O15027;O15027-5;O15027-2;O15027-4;O15027-3;A4QN19;A4QN18;X6RGP5;Q9BV84;Q8N9G1;G1UI25;A0PJ75;B4DW51;B4DY06;Q8N2P2	Protein transport protein Sec16A	SEC16A	tr|J3KNL6|J3KNL6_HUMAN Protein transport protein sec16 OS=Homo sapiens OX=9606 GN=SEC16A PE=1 SV=1;tr|F1T0I1|F1T0I1_HUMAN Protein transport protein sec16 OS=Homo sapiens OX=9606 GN=SEC16A PE=1 SV=1;sp|O15027|SC16A_HUMAN Protein transport protein Sec16A OS=	-4.92366	1.80671
828	A0A0S2Z3K4;J3QTA2;Q99933-4;Q99933-3;Q99933;Q99933-2;C9JYK5;A0A0U1RQD7;F1LLU6;A0A0S2Z3F5	BAG family molecular chaperone regulator 1	BAG1	tr|A0A0S2Z3K4|A0A0S2Z3K4_HUMAN BCL2-associated athanogene isoform 1 (Fragment) OS=Homo sapiens OX=9606 GN=BAG1 PE=2 SV=1;tr|J3QTA2|J3QTA2_HUMAN BAG family molecular chaperone regulator 1 OS=Homo sapiens OX=9606 GN=BAG1 PE=1 SV=1;sp|Q99933-4|BAG1_HUMAN Isof	-4.71487	3.2138
1738	J3KMX2;B9EGA3;Q92925-3;Q92925-2;Q92925;J3QWB6	SWI/SNF-related matrix-associated actin-dependent regulator of chromatin subfamily D member 2	SMARCD2	tr|J3KMX2|J3KMX2_HUMAN SWI/SNF-related matrix-associated actin-dependent regulator of chromatin subfamily D member 2 OS=Homo sapiens OX=9606 GN=SMARCD2 PE=1 SV=1;tr|B9EGA3|B9EGA3_HUMAN SMARCD2 protein OS=Homo sapiens OX=9606 GN=SMARCD2 PE=1 SV=1;sp|Q92925-	17.3004	0.60206
2099	M4QHP2;Q96HU3;E7EUT2;H7C2J5;H3BRR7;H0YB49;H3BSF6	Piezo-type mechanosensitive ion channel component	PIEZO1	tr|M4QHP2|M4QHP2_HUMAN Piezo-type mechanosensitive ion channel component OS=Homo sapiens OX=9606 GN=PIEZO1 PE=2 SV=1	-1.25052	0.782613
1054	A0A2R8Y6I6;Q13627-2;A0A2R8Y443;A0A2R8YDF3;A0A2R8Y6L5;Q13627-4;Q13627-3;Q13627-5;Q13627;B4DX02;O94789;Q15446;A0A2R8YEY4;E7EMI5;B4DXU2;A0A024R0J6;A0A024R0M8;B3KQI0;A0A024R0I0;Q9Y463-2;Q9Y463-3;Q9Y463	Dual specificity tyrosine-phosphorylation-regulated kinase 1A	DYRK1A	tr|A0A2R8Y6I6|A0A2R8Y6I6_HUMAN Dual-specificity tyrosine-phosphorylation-regulated kinase 1A OS=Homo sapiens OX=9606 GN=DYRK1A PE=1 SV=1;sp|Q13627-2|DYR1A_HUMAN Isoform 1 of Dual specificity tyrosine-phosphorylation-regulated kinase 1A OS=Homo sapiens OX=9	-5.33271	0.909951
1873	E7EX90;Q14203-3;Q14203-4;Q6MZZ3;Q14203-5;Q14203-6;Q14203;Q14203-2;Q6AWB1;E7EWF7;Q6AWB3;C9J1B7;C9JZA4;C9JTE5;C9JJN7;C9JJD0;C9JKG6;E9PCY0;O95654;Q59F36	Dynactin subunit 1	DCTN1;DKFZp686I0746;DKFZp686E0752	tr|E7EX90|E7EX90_HUMAN Dynactin subunit 1 OS=Homo sapiens OX=9606 GN=DCTN1 PE=1 SV=1;sp|Q14203-3|DCTN1_HUMAN Isoform 3 of Dynactin subunit 1 OS=Homo sapiens OX=9606 GN=DCTN1;sp|Q14203-4|DCTN1_HUMAN Isoform 4 of Dynactin subunit 1 OS=Homo sapiens OX=9606 GN	-2.96414	0.713543
129	A0A024R1E1;A0A024R1F9;Q9H1I8-3;Q9H1I8;Q659F6;Q53H58;Q53G98;H7C3Y4;B1AH59;Q9H1I8-2	Activating signal cointegrator 1 complex subunit 2	ASCC2;DKFZp586O0223	tr|A0A024R1E1|A0A024R1E1_HUMAN Activating signal cointegrator 1 complex subunit 2, isoform CRA_a OS=Homo sapiens OX=9606 GN=ASCC2 PE=4 SV=1;tr|A0A024R1F9|A0A024R1F9_HUMAN Activating signal cointegrator 1 complex subunit 2, isoform CRA_c OS=Homo sapiens OX=	-3.10543	0.790609
1176	C9JRD2;C9JXB9;A8K0R1;P25686-2;P25686;C9J1G2;E7ETU0;C9JX00;B4DF16	DnaJ homolog subfamily B member 2	DNAJB2	tr|C9JRD2|C9JRD2_HUMAN DnaJ homolog subfamily B member 2 (Fragment) OS=Homo sapiens OX=9606 GN=DNAJB2 PE=1 SV=1;tr|C9JXB9|C9JXB9_HUMAN DnaJ homolog subfamily B member 2 (Fragment) OS=Homo sapiens OX=9606 GN=DNAJB2 PE=1 SV=1;tr|A8K0R1|A8K0R1_HUMAN cDNA FLJ7	17.4755	0.60206
2442	P42166	Lamina-associated polypeptide 2, isoform alpha;Thymopoietin;Thymopentin	TMPO	sp|P42166|LAP2A_HUMAN Lamina-associated polypeptide 2, isoform alpha OS=Homo sapiens OX=9606 GN=TMPO PE=1 SV=2	-3.03458	1.1065
1388	B3KXH8;B2RAU5;Q9Y5X1;Q59ES5;O95061	Sorting nexin;Sorting nexin-9	SNX9	tr|B3KXH8|B3KXH8_HUMAN cDNA FLJ45417 fis, clone BRHIP3033811, highly similar to Sorting nexin-9 OS=Homo sapiens OX=9606 PE=2 SV=1;tr|B2RAU5|B2RAU5_HUMAN Sorting nexin OS=Homo sapiens OX=9606 PE=2 SV=1;sp|Q9Y5X1|SNX9_HUMAN Sorting nexin-9 OS=Homo sapiens OX	17.6407	0.60206
2702	Q14432;A7E2E5;Q13370-2;Q13370	cGMP-inhibited 3,5-cyclic phosphodiesterase A	PDE3A	sp|Q14432|PDE3A_HUMAN cGMP-inhibited 3,5-cyclic phosphodiesterase A OS=Homo sapiens OX=9606 GN=PDE3A PE=1 SV=3	-4.3199	1.35511
2964	Q7Z2W4;A8K9U6;C9J6P4;Q7Z2W4-2;Q7Z2W4-3;Q05DV5;Q7Z2W4-4;H7C5K1;Q7Z2W4-5	Zinc finger CCCH-type antiviral protein 1	ZC3HAV1	sp|Q7Z2W4|ZCCHV_HUMAN Zinc finger CCCH-type antiviral protein 1 OS=Homo sapiens OX=9606 GN=ZC3HAV1 PE=1 SV=3;tr|A8K9U6|A8K9U6_HUMAN cDNA FLJ76121, highly similar to Homo sapiens zinc finger CCCH-type, antiviral 1 (ZC3HAV1), transcript variant 1, mRNA OS=Ho	-5.43183	1.15343
1166	A7LNJ1;Q8WUM9;B3KVU0;H7BZK4	Sodium-dependent phosphate transporter 1	SLC20A1	tr|A7LNJ1|A7LNJ1_HUMAN Phosphate transporter OS=Homo sapiens OX=9606 GN=SLC20A1 PE=2 SV=1;sp|Q8WUM9|S20A1_HUMAN Sodium-dependent phosphate transporter 1 OS=Homo sapiens OX=9606 GN=SLC20A1 PE=1 SV=1;tr|B3KVU0|B3KVU0_HUMAN Phosphate transporter OS=Homo sapie	17.9116	0.60206
2033	J3KMX1;Q99567;B7Z5I6;B4DP20;I3L245	Nuclear pore complex protein Nup88	NUP88	tr|J3KMX1|J3KMX1_HUMAN Nuclear pore complex protein Nup88 (Fragment) OS=Homo sapiens OX=9606 GN=NUP88 PE=1 SV=1;sp|Q99567|NUP88_HUMAN Nuclear pore complex protein Nup88 OS=Homo sapiens OX=9606 GN=NUP88 PE=1 SV=2;tr|B7Z5I6|B7Z5I6_HUMAN cDNA FLJ56516, highly	-3.33852	0.505661
3112	Q93050-3;Q5CZH6	V-type proton ATPase 116 kDa subunit a isoform 1;V-type proton ATPase subunit a	ATP6V0A1;DKFZp686N0561	sp|Q93050-3|VPP1_HUMAN Isoform 3 of V-type proton ATPase 116 kDa subunit a isoform 1 OS=Homo sapiens OX=9606 GN=ATP6V0A1;tr|Q5CZH6|Q5CZH6_HUMAN V-type proton ATPase subunit a OS=Homo sapiens OX=9606 GN=DKFZp686N0561 PE=2 SV=1	18.2444	0.60206
1970	Q59FI2;H0Y6Z7;P10586-2;P10586;H0Y4H1;H0Y7Z9;Q7Z3X4;B3KWM1;Q5W9G3;B4DWI5;B3KXA8;H0Y380;B4DK48;Q59H90;Q3KPI9;G8JL96;Q9UM81;F5GWR7;A0A0A0MR60;Q59FX6;Q2HXI4;P23468-3;Q13332-7;P23468-7;P23468-5;P23468-4;P23468-6;Q13332-5;P23468-2;Q13332-6;P23468;Q13332-3;Q13332-4;Q13332-2;Q13332	Receptor-type tyrosine-protein phosphatase F;Protein-tyrosine-phosphatase	PTPRF;DKFZp686B1310;LAR	tr|Q59FI2|Q59FI2_HUMAN Protein tyrosine phosphatase, receptor type, F isoform 2 variant (Fragment) OS=Homo sapiens OX=9606 PE=2 SV=1;tr|H0Y6Z7|H0Y6Z7_HUMAN Receptor-type tyrosine-protein phosphatase F (Fragment) OS=Homo sapiens OX=9606 GN=PTPRF PE=1 SV=1;s	18.2513	0.60206
370	B4E054;A0A024R7X3;Q8TF11;A0A024R7U9;Q9UI12-2;Q9UI12;G3V126;B3KUZ7;E5RG49;E5RHH0;E5RK31;E5RJG1;H0YB41	V-type proton ATPase subunit H	ATP6V1H	tr|B4E054|B4E054_HUMAN V-type proton ATPase subunit H OS=Homo sapiens OX=9606 PE=2 SV=1;tr|A0A024R7X3|A0A024R7X3_HUMAN V-type proton ATPase subunit H OS=Homo sapiens OX=9606 GN=ATP6V1H PE=3 SV=1;tr|Q8TF11|Q8TF11_HUMAN V-type proton ATPase subunit H OS=Homo	-3.57075	1.39453
858	A0A0S2Z4Z0;Q96PK6;Q59GV2;A0A0S2Z567;Q96PK6-2;A0A0A6YYI9;A0A0S2Z5V2;F8WDX3;A0A0A0MSL8;B8ZZ74;Q96PK6-3;Q96PK6-4;B4DNG4	RNA-binding protein 14	RBM14	tr|A0A0S2Z4Z0|A0A0S2Z4Z0_HUMAN RNA binding motif protein 14 isoform 1 (Fragment) OS=Homo sapiens OX=9606 GN=RBM14 PE=2 SV=1;sp|Q96PK6|RBM14_HUMAN RNA-binding protein 14 OS=Homo sapiens OX=9606 GN=RBM14 PE=1 SV=2	-9.35394	0.992061
2687	Q96C98;Q9P100;Q13643	Four and a half LIM domains protein 3	FHL3	tr|Q96C98|Q96C98_HUMAN FHL3 protein OS=Homo sapiens OX=9606 GN=FHL3 PE=1 SV=1;tr|Q9P100|Q9P100_HUMAN LIM-only protein FHL3 OS=Homo sapiens OX=9606 GN=FHL3 PE=2 SV=1;sp|Q13643|FHL3_HUMAN Four and a half LIM domains protein 3 OS=Homo sapiens OX=9606 GN=FHL3	-3.97834	0.795826
1541	B4DHL7;H3BND4;Q6P996-3;Q6P996-4;Q6P996-5;Q6P996;J3KNK7;Q86XE2;Q6P996-2;Q6XYB5;H3BNL6	Pyridoxal-dependent decarboxylase domain-containing protein 1	PDXDC1	tr|B4DHL7|B4DHL7_HUMAN cDNA FLJ59515 OS=Homo sapiens OX=9606 PE=2 SV=1;tr|H3BND4|H3BND4_HUMAN Pyridoxal-dependent decarboxylase domain-containing protein 1 OS=Homo sapiens OX=9606 GN=PDXDC1 PE=1 SV=1;sp|Q6P996-3|PDXD1_HUMAN Isoform 3 of Pyridoxal-dependent	-2.72956	1.28523
739	A0A0A0MT59;B4DXQ8;B3KWX6;Q53EY5;B3KX14;Q15014;Q5JXX1;Q5JXX2	Mortality factor 4-like protein 2	MORF4L2	tr|A0A0A0MT59|A0A0A0MT59_HUMAN Mortality factor 4-like protein 2 OS=Homo sapiens OX=9606 GN=MORF4L2 PE=1 SV=1;tr|B4DXQ8|B4DXQ8_HUMAN cDNA FLJ52940, highly similar to Mortality factor 4-like protein 2 OS=Homo sapiens OX=9606 PE=2 SV=1;tr|B3KWX6|B3KWX6_HUMAN	18.3797	0.60206
1384	B2RAH5;O14974-4;O14974-3;O14974;O14974-5;O14974-2;H0YIM2;H0YIS3;F8VZN8;A0A024RBF1;A0A0U1RQZ1;H0YIS4;H0YHI8	Protein phosphatase 1 regulatory subunit;Protein phosphatase 1 regulatory subunit 12A	PPP1R12A	tr|B2RAH5|B2RAH5_HUMAN cDNA, FLJ94919, highly similar to Homo sapiens protein phosphatase 1, regulatory (inhibitor) subunit 12A (PPP1R12A), mRNA OS=Homo sapiens OX=9606 PE=2 SV=1;sp|O14974-4|MYPT1_HUMAN Isoform 4 of Protein phosphatase 1 regulatory subunit	-3.33382	0.918496
2786	Q52LJ0-2;Q52LJ0;H0YNA1	Protein FAM98B	FAM98B	sp|Q52LJ0-2|FA98B_HUMAN Isoform 2 of Protein FAM98B OS=Homo sapiens OX=9606 GN=FAM98B;sp|Q52LJ0|FA98B_HUMAN Protein FAM98B OS=Homo sapiens OX=9606 GN=FAM98B PE=1 SV=1	-2.27924	0.680884
180	D6RBU8;B3KR06;E7ENG2;B4DG03;A0A024R2J1;Q8NB74;A0A024R2S6;E3W994;J3KR49;A0A0U1RQI6;E7ERI8;E7EW49;O75122-2;O75122;O75122-3;C9J668;B4DM73	CLIP-associating protein 2	CLASP2	tr|D6RBU8|D6RBU8_HUMAN CLIP-associating protein 2 (Fragment) OS=Homo sapiens OX=9606 GN=CLASP2 PE=1 SV=1;tr|B3KR06|B3KR06_HUMAN Cytoplasmic linker associated protein 2, isoform CRA_c OS=Homo sapiens OX=9606 GN=CLASP2 PE=1 SV=1;tr|E7ENG2|E7ENG2_HUMAN CLIP-a	18.4627	0.60206
711	A0A0C4DG68;A0A0A0MR59;B7ZL34;Q8TB72-2;Q8TB72-4;Q8TB72-3;Q8TB72	Pumilio homolog 2	PUM2	tr|A0A0C4DG68|A0A0C4DG68_HUMAN Pumilio homolog 2 (Fragment) OS=Homo sapiens OX=9606 GN=PUM2 PE=1 SV=1;tr|A0A0A0MR59|A0A0A0MR59_HUMAN Pumilio homolog 2 OS=Homo sapiens OX=9606 GN=PUM2 PE=1 SV=1;tr|B7ZL34|B7ZL34_HUMAN PUM2 protein OS=Homo sapiens OX=9606 GN=	18.4638	0.60206
546	C9IZF6;A0A024RBU8;P41247-2;P41247	Patatin-like phospholipase domain-containing protein 4	PNPLA4	tr|C9IZF6|C9IZF6_HUMAN Patatin-like phospholipase domain-containing protein 4 (Fragment) OS=Homo sapiens OX=9606 GN=PNPLA4 PE=1 SV=1;tr|A0A024RBU8|A0A024RBU8_HUMAN Patatin-like phospholipase domain containing 4, isoform CRA_b OS=Homo sapiens OX=9606 GN=PNP	18.4646	0.60206
2518	P55795;B4DFK9;B4DP00	Heterogeneous nuclear ribonucleoprotein H2	HNRNPH2	sp|P55795|HNRH2_HUMAN Heterogeneous nuclear ribonucleoprotein H2 OS=Homo sapiens OX=9606 GN=HNRNPH2 PE=1 SV=1;tr|B4DFK9|B4DFK9_HUMAN cDNA FLJ57964, highly similar to Heterogeneous nuclear ribonucleoprotein H OS=Homo sapiens OX=9606 PE=2 SV=1;tr|B4DP00|B4D	-3.37886	0.973664
2802	Q53GW1;Q8WVM8;B7Z738;Q8WVM8-2;Q8WVM8-3;B7Z5N7;H0YJY1;J3KNG4;G3V2M8;G3V3K9;G3V4I1;G3V363;H0YJS6;G3V5F3	Sec1 family domain-containing protein 1	SCFD1	tr|Q53GW1|Q53GW1_HUMAN Vesicle transport-related protein isoform a variant (Fragment) OS=Homo sapiens OX=9606 PE=2 SV=1;sp|Q8WVM8|SCFD1_HUMAN Sec1 family domain-containing protein 1 OS=Homo sapiens OX=9606 GN=SCFD1 PE=1 SV=4;tr|B7Z738|B7Z738_HUMAN cDNA FLJ	-2.1221	0.412194
3097	Q8WZ19;H3BM90	BTB/POZ domain-containing adapter for CUL3-mediated RhoA degradation protein 1	KCTD13	sp|Q8WZ19|BACD1_HUMAN BTB/POZ domain-containing adapter for CUL3-mediated RhoA degradation protein 1 OS=Homo sapiens OX=9606 GN=KCTD13 PE=1 SV=1;tr|H3BM90|H3BM90_HUMAN BTB/POZ domain-containing adapter for CUL3-mediated RhoA degradation protein 1 (Fragment	18.6127	0.60206
2634	Q08499-11;D6R9L4;D6RBB2;D6RAQ0;D6RIG1	cAMP-specific 3,5-cyclic phosphodiesterase 4D	PDE4D	sp|Q08499-11|PDE4D_HUMAN Isoform 7 of cAMP-specific 3,5-cyclic phosphodiesterase 4D OS=Homo sapiens OX=9606 GN=PDE4D	-2.19797	0.419254
3186	Q9BTI6		FLOT2	tr|Q9BTI6|Q9BTI6_HUMAN FLOT2 protein OS=Homo sapiens OX=9606 GN=FLOT2 PE=2 SV=1	18.6756	0.60206
1742	C7DUW4;Q6FI23;Q6FHG1;Q53EZ9;P46734-2;P46734;P46734-3;J3KRV4	Dual specificity mitogen-activated protein kinase kinase 3	MAP2K3	tr|C7DUW4|C7DUW4_HUMAN Mitogen activated protein kinase kinase 3 OS=Homo sapiens OX=9606 GN=MAP2K3 PE=2 SV=1;tr|Q6FI23|Q6FI23_HUMAN MAP2K3 protein OS=Homo sapiens OX=9606 GN=MAP2K3 PE=2 SV=1;tr|Q6FHG1|Q6FHG1_HUMAN MAP2K3 protein (Fragment) OS=Homo sapiens	-1.6912	1.18041
2089	M0QXB4;O14579;M0R061;Q7Z4Z1;Q53HJ6;O14579-3;O14579-2	Coatomer subunit epsilon	COPE	tr|M0QXB4|M0QXB4_HUMAN Coatomer protein complex, subunit epsilon, isoform CRA_g OS=Homo sapiens OX=9606 GN=COPE PE=1 SV=1;sp|O14579|COPE_HUMAN Coatomer subunit epsilon OS=Homo sapiens OX=9606 GN=COPE PE=1 SV=3;tr|M0R061|M0R061_HUMAN Coatomer subunit epsilo	-3.98582	1.00908
2241	O95639;O95639-3;O95639-2;B7Z7B0;C9JEV9;C9K0K2;H7C419;H7C016;F8WEL7;H9KVA5;A6NMK7	Cleavage and polyadenylation specificity factor subunit 4	CPSF4	sp|O95639|CPSF4_HUMAN Cleavage and polyadenylation specificity factor subunit 4 OS=Homo sapiens OX=9606 GN=CPSF4 PE=1 SV=1;sp|O95639-3|CPSF4_HUMAN Isoform 3 of Cleavage and polyadenylation specificity factor subunit 4 OS=Homo sapiens OX=9606 GN=CPSF4;sp|O9	-8.43832	1.18227
2861	Q5T8P6-2;Q5T8P6-3;Q5T8P6;A0A087X0H9;Q5T8P6-5;Q5T8P6-4;B4DZH7;Q5T8P6-6;E2PSN0	RNA-binding protein 26	RBM26	sp|Q5T8P6-2|RBM26_HUMAN Isoform 2 of RNA-binding protein 26 OS=Homo sapiens OX=9606 GN=RBM26;sp|Q5T8P6-3|RBM26_HUMAN Isoform 3 of RNA-binding protein 26 OS=Homo sapiens OX=9606 GN=RBM26;sp|Q5T8P6|RBM26_HUMAN RNA-binding protein 26 OS=Homo sapiens OX=9606 G	-5.34607	0.807458
2107	O00425;F8WD15;O00425-2	Insulin-like growth factor 2 mRNA-binding protein 3	IGF2BP3	sp|O00425|IF2B3_HUMAN Insulin-like growth factor 2 mRNA-binding protein 3 OS=Homo sapiens OX=9606 GN=IGF2BP3 PE=1 SV=2	-3.20978	0.835999
2712	Q14692	Ribosome biogenesis protein BMS1 homolog	BMS1	sp|Q14692|BMS1_HUMAN Ribosome biogenesis protein BMS1 homolog OS=Homo sapiens OX=9606 GN=BMS1 PE=1 SV=1	19.1964	0.60206
1354	B2R6Z3;O14965;B4DX16;A3KFJ0;Q5QPD4;A3KFJ1;Q5QPD2;B4DXA6	Aurora kinase A	AURKA	tr|B2R6Z3|B2R6Z3_HUMAN cDNA, FLJ93192, highly similar to Homo sapiens serine/threonine kinase 6 (STK6), mRNA OS=Homo sapiens OX=9606 PE=2 SV=1;sp|O14965|AURKA_HUMAN Aurora kinase A OS=Homo sapiens OX=9606 GN=AURKA PE=1 SV=2;tr|B4DX16|B4DX16_HUMAN cDNA FLJ5	0.593574	0.755296
1174	A8K285;A8K0M6;Q8NBN3;A8K369;B4DN92;Q8NBN3-3;Q8NBN3-2;H3BMU0;H3BTS6	Transmembrane protein 87A	TMEM87A	tr|A8K285|A8K285_HUMAN cDNA FLJ78239 OS=Homo sapiens OX=9606 PE=2 SV=1;tr|A8K0M6|A8K0M6_HUMAN cDNA FLJ76697 OS=Homo sapiens OX=9606 PE=2 SV=1;sp|Q8NBN3|TM87A_HUMAN Transmembrane protein 87A OS=Homo sapiens OX=9606 GN=TMEM87A PE=1 SV=3;tr|A8K369|A8K369_HUMA	19.443	0.60206
1900	E9PRH4;E9PNN7		SLC39A13	tr|E9PRH4|E9PRH4_HUMAN Zinc transporter ZIP13 OS=Homo sapiens OX=9606 GN=SLC39A13 PE=1 SV=1;tr|E9PNN7|E9PNN7_HUMAN Zinc transporter ZIP13 OS=Homo sapiens OX=9606 GN=SLC39A13 PE=1 SV=8	19.5186	0.60206
211	A0A024R3K2;Q96CM3;Q96CM3-2;B4DUN4	RNA pseudouridylate synthase domain-containing protein 4	RPUSD4	tr|A0A024R3K2|A0A024R3K2_HUMAN RNA pseudouridylate synthase domain containing 4, isoform CRA_a OS=Homo sapiens OX=9606 GN=RPUSD4 PE=4 SV=1;sp|Q96CM3|RUSD4_HUMAN Mitochondrial RNA pseudouridine synthase RPUSD4 OS=Homo sapiens OX=9606 GN=RPUSD4 PE=1 SV=1;sp|	19.5723	0.60206
2200	O75525-2;O75525;H0YAQ1;H0YAQ3;E5RJZ9;E5RG12	KH domain-containing, RNA-binding, signal transduction-associated protein 3	KHDRBS3	sp|O75525-2|KHDR3_HUMAN Isoform 2 of KH domain-containing, RNA-binding, signal transduction-associated protein 3 OS=Homo sapiens OX=9606 GN=KHDRBS3;sp|O75525|KHDR3_HUMAN KH domain-containing, RNA-binding, signal transduction-associated protein 3 OS=Homo sa	-5.97018	2.54751
2925	Q6PKG0;Q6PKG0-3;A0A0B4J210;E5RH50;H0YBW1;H0YC33;H0YC73;Q659C4-7;Q659C4-6;Q659C4-5;Q659C4-2;H0YAN4;H0YBR8;E5RHK4	La-related protein 1	LARP1	sp|Q6PKG0|LARP1_HUMAN La-related protein 1 OS=Homo sapiens OX=9606 GN=LARP1 PE=1 SV=2;sp|Q6PKG0-3|LARP1_HUMAN Isoform 2 of La-related protein 1 OS=Homo sapiens OX=9606 GN=LARP1;tr|A0A0B4J210|A0A0B4J210_HUMAN La-related protein 1 (Fragment) OS=Homo sapiens	-3.97049	1.2992
1393	B2RBD5;Q13509;Q9BV28;Q53G92;A0A0B4J269;Q13509-2;Q3ZCR3;G3V2A3;G3V5W4;G3V2R8;G3V3R4;G3V2N6;G3V542;G3V3J6;G3V3W7	Tubulin beta-3 chain	TUBB3	tr|B2RBD5|B2RBD5_HUMAN Tubulin beta chain OS=Homo sapiens OX=9606 PE=2 SV=1;sp|Q13509|TBB3_HUMAN Tubulin beta-3 chain OS=Homo sapiens OX=9606 GN=TUBB3 PE=1 SV=2;tr|Q9BV28|Q9BV28_HUMAN Tubulin beta chain (Fragment) OS=Homo sapiens OX=9606 GN=TUBB3 PE=2 SV=2	-1.20633	1.08596
1667	B4E2Q0;P98194-2;P98194-4;P98194;P98194-3;P98194-5;P98194-9;P98194-6;P98194-7;H0Y9V7;B4E295;P98194-8;Q59G44;H0Y9S7;H0Y8X9;D6RGE9;D6REJ1;D6RHV9	Calcium-transporting ATPase;Calcium-transporting ATPase type 2C member 1	ATP2C1	tr|B4E2Q0|B4E2Q0_HUMAN Calcium-transporting ATPase OS=Homo sapiens OX=9606 GN=ATP2C1 PE=1 SV=1;sp|P98194-2|AT2C1_HUMAN Isoform 2 of Calcium-transporting ATPase type 2C member 1 OS=Homo sapiens OX=9606 GN=ATP2C1;sp|P98194-4|AT2C1_HUMAN Isoform 4 of Calcium-	19.7876	0.60206
1960	G5E9Z2;B3KY18		CLPTM1L	tr|G5E9Z2|G5E9Z2_HUMAN Cisplatin resistance related protein CRR9p, isoform CRA_c OS=Homo sapiens OX=9606 GN=CLPTM1L PE=1 SV=1	19.791	0.60206
2196	O75400-3;H0YG38	Pre-mRNA-processing factor 40 homolog A	PRPF40A	sp|O75400-3|PR40A_HUMAN Isoform 3 of Pre-mRNA-processing factor 40 homolog A OS=Homo sapiens OX=9606 GN=PRPF40A	0.704835	0.462505
2929	Q6UN15;A0A0B4J203;B4DTW7;H0Y8P7	Pre-mRNA 3-end-processing factor FIP1	FIP1L1	sp|Q6UN15|FIP1_HUMAN Pre-mRNA 3-end-processing factor FIP1 OS=Homo sapiens OX=9606 GN=FIP1L1 PE=1 SV=1;tr|A0A0B4J203|A0A0B4J203_HUMAN Uncharacterized protein OS=Homo sapiens OX=9606 PE=3 SV=1;tr|B4DTW7|B4DTW7_HUMAN cDNA FLJ61400, highly similar to Pre-mRN	-6.87588	1.41094
3306	Q9NYV4-2;Q9NYV4;J3QSD7;Q9NYV4-3;A0A2I6PNI6	Cyclin-dependent kinase 12	CDK12	sp|Q9NYV4-2|CDK12_HUMAN Isoform 2 of Cyclin-dependent kinase 12 OS=Homo sapiens OX=9606 GN=CDK12;sp|Q9NYV4|CDK12_HUMAN Cyclin-dependent kinase 12 OS=Homo sapiens OX=9606 GN=CDK12 PE=1 SV=2;tr|J3QSD7|J3QSD7_HUMAN Cyclin-dependent kinase 12 (Fragment) OS=Hom	-0.991305	0.428091
171	Q53FS4;B2R774;A0A024R2A7;P49257;B4DVV0;A0PJ85	Protein ERGIC-53	LMAN1	tr|Q53FS4|Q53FS4_HUMAN Lectin, mannose-binding, 1 variant (Fragment) OS=Homo sapiens OX=9606 PE=2 SV=1;tr|B2R774|B2R774_HUMAN cDNA, FLJ93313, highly similar to Homo sapiens lectin, mannose-binding, 1 (LMAN1), mRNA OS=Homo sapiens OX=9606 PE=2 SV=1;tr|A0A02	19.9028	0.60206
1694	B7Z4B7;B7Z6U8;Q53FI7;Q13642-1;Q13642-5;Q13642-4;Q5JXI8;B7Z5T3;B7Z5V0;B3KRI9;B7Z9A1;Q13642;A0A0D9SG53;A0A0D9SGB2;Q5JXI0;A0A0D9SFI6;A0A0D9SFB0;Q5JXH9;A0A0D9SFZ9;Q5JXH8;Q5JXH7;Q5JXI3;Q5JXI2;Q13642-3	Four and a half LIM domains protein 1	FHL1	tr|B7Z4B7|B7Z4B7_HUMAN cDNA FLJ52561, highly similar to Four and a half LIM domains protein 1 OS=Homo sapiens OX=9606 PE=2 SV=1;tr|B7Z6U8|B7Z6U8_HUMAN cDNA FLJ53665, highly similar to Four and a half LIM domains protein 1 OS=Homo sapiens OX=9606 PE=2 SV=1;	-3.33623	1.756
3076	Q8TEP9		FLJ00144	tr|Q8TEP9|Q8TEP9_HUMAN FLJ00144 protein (Fragment) OS=Homo sapiens OX=9606 GN=FLJ00144 PE=2 SV=1	20.0158	0.60206
892	F6XEV2;A0A0U1RRK1;A0A286YF11;Q9BPX6-2;Q9BPX6;Q9BPX6-3;E9PQV6;Q9BPX6-5;Q9BPX6-4;S4R3W3;S4R3D7;S4R3V1	Calcium uptake protein 1, mitochondrial	MICU1	tr|F6XEV2|F6XEV2_HUMAN Calcium uptake protein 1, mitochondrial OS=Homo sapiens OX=9606 GN=MICU1 PE=1 SV=2;tr|A0A0U1RRK1|A0A0U1RRK1_HUMAN Calcium uptake protein 1, mitochondrial OS=Homo sapiens OX=9606 GN=MICU1 PE=1 SV=1;tr|A0A286YF11|A0A286YF11_HUMAN Calci	20.0272	0.60206
849	A0A0S2Z4Q3;A0A0S2Z4K2;P62633-2;P62633;P62633-7;P62633-3;P62633-8;P62633-5;P62633-4;P62633-6;Q6T598;A0A0S2Z4P7	Cellular nucleic acid-binding protein	CNBP	tr|A0A0S2Z4Q3|A0A0S2Z4Q3_HUMAN CCHC-type zinc finger nucleic acid binding protein isoform 1 (Fragment) OS=Homo sapiens OX=9606 GN=CNBP PE=2 SV=1;tr|A0A0S2Z4K2|A0A0S2Z4K2_HUMAN CCHC-type zinc finger nucleic acid binding protein isoform 3 (Fragment) OS=Homo	-6.07849	1.25351
2592	P78406;E9PQ57;E9PPG9;Q5J8M4;B0QZ36;B0QZ37	mRNA export factor	RAE1	sp|P78406|RAE1L_HUMAN mRNA export factor OS=Homo sapiens OX=9606 GN=RAE1 PE=1 SV=1;tr|E9PQ57|E9PQ57_HUMAN mRNA export factor OS=Homo sapiens OX=9606 GN=RAE1 PE=1 SV=1;tr|E9PPG9|E9PPG9_HUMAN mRNA export factor OS=Homo sapiens OX=9606 GN=RAE1 PE=1 SV=1;tr|Q5	-4.43998	0.827793
1973	H0YEX5		SF3B2	tr|H0YEX5|H0YEX5_HUMAN Splicing factor 3B subunit 2 (Fragment) OS=Homo sapiens OX=9606 GN=SF3B2 PE=1 SV=1	-0.843289	0.316281
2901	Q6IEG3;Q8N8D1;H3BT73;A3KMF9;Q569I4	Programmed cell death protein 7	PDCD7	tr|Q6IEG3|Q6IEG3_HUMAN Programmed cell death 7, isoform CRA_a OS=Homo sapiens OX=9606 GN=PDCD7 PE=2 SV=1;sp|Q8N8D1|PDCD7_HUMAN Programmed cell death protein 7 OS=Homo sapiens OX=9606 GN=PDCD7 PE=1 SV=1;tr|H3BT73|H3BT73_HUMAN Programmed cell death protein 7	-2.07159	1.53771
1331	H9PBP8;B2KLH3;A0A097KU60;A0A097KU34;A0A1B0TCA9;A0A097KU02;A0A097KU64;Q85KY2;Q85KY0;Q85KX6;Q85KX2;Q85KX0;Q85KW7;Q85KW3;Q85KU6;Q85KU0;Q85KS7;Q85BA9;Q7YEH1;Q7YEH0;Q7YEG2;Q7YEF8;Q7YEF6;Q7YEE2;Q7YED9;Q7YCH2;Q7YCH0;Q7YCG5;Q7YCG3;Q7YCG2;Q7YCF9;Q7YCF5;Q7YCE7;Q7YCE1;Q7YCC9;Q7YCC5;Q7YCC2;Q7Y7L3;Q7Y7L1;Q7Y784;Q7Y757;Q7HZN7;Q7GXV8;Q6XB68;Q6XB34;Q6XB24;Q6WQ82;Q6RNW0;Q6RNH7;Q6RNC6;Q6RN86;Q6RM70;Q6RLQ6;Q6RLD5;Q…	Cytochrome b	CYTB;cytb;Cytb;CytB;CYB	tr|H9PBP8|H9PBP8_HUMAN Cytochrome b OS=Homo sapiens OX=9606 GN=CYTB PE=3 SV=1;tr|B2KLH3|B2KLH3_HUMAN Cytochrome b OS=Homo sapiens OX=9606 GN=CYTB PE=3 SV=1;tr|A0A097KU60|A0A097KU60_HUMAN Cytochrome b (Fragment) OS=Homo sapiens OX=9606 GN=CYTB PE=4 SV=1;tr|	20.2372	0.60206
3157	Q96LT9-2;Q96LT9;X6RLP6;H0YEB8;E9PPV2	RNA-binding protein 40	RNPC3	sp|Q96LT9-2|RNPC3_HUMAN Isoform 2 of RNA-binding region-containing protein 3 OS=Homo sapiens OX=9606 GN=RNPC3;sp|Q96LT9|RNPC3_HUMAN RNA-binding region-containing protein 3 OS=Homo sapiens OX=9606 GN=RNPC3 PE=1 SV=1	-2.51851	1.86173
271	B0AZP8;A8K2X6;A0A024R4Y2;Q8NBI5;Q8NBI5-2;E9PS74;H0YD64;H0YCG3;B4DV87	Solute carrier family 43 member 3	hCG_39762;SLC43A3	tr|B0AZP8|B0AZP8_HUMAN cDNA, FLJ79488, highly similar to Homo sapiens solute carrier family 43, member 3 (SLC43A3), mRNA OS=Homo sapiens OX=9606 PE=2 SV=1;tr|A8K2X6|A8K2X6_HUMAN cDNA FLJ77840, highly similar to Homo sapiens solute carrier family 43, member	-1.51616	1.11759
3297	Q9NXE8;B4DJK2;B4DZL1;B7Z9W2;Q9NXE8-2;A0A087WY60	Pre-mRNA-splicing factor CWC25 homolog	CWC25	sp|Q9NXE8|CWC25_HUMAN Pre-mRNA-splicing factor CWC25 homolog OS=Homo sapiens OX=9606 GN=CWC25 PE=1 SV=1;tr|B4DJK2|B4DJK2_HUMAN cDNA FLJ52308 OS=Homo sapiens OX=9606 PE=2 SV=1;tr|B4DZL1|B4DZL1_HUMAN cDNA FLJ55385 OS=Homo sapiens OX=9606 PE=2 SV=1;tr|B7Z9W2|	-4.42162	1.03565
685	B7Z4K7;A0A087X159;P81877-2;P81877-4;P81877-5;P81877-3;P81877	Single-stranded DNA-binding protein 2	SSBP2	tr|B7Z4K7|B7Z4K7_HUMAN cDNA FLJ52868, highly similar to Single-stranded DNA-binding protein 2 OS=Homo sapiens OX=9606 PE=2 SV=1;tr|A0A087X159|A0A087X159_HUMAN Single-stranded DNA-binding protein 2 OS=Homo sapiens OX=9606 GN=SSBP2 PE=1 SV=1;sp|P81877-2|SSBP	20.3509	0.60206
2958	Q7L2J0;A8K5Q1;Q7L2J0-2	7SK snRNA methylphosphate capping enzyme	MEPCE	sp|Q7L2J0|MEPCE_HUMAN 7SK snRNA methylphosphate capping enzyme OS=Homo sapiens OX=9606 GN=MEPCE PE=1 SV=1;tr|A8K5Q1|A8K5Q1_HUMAN cDNA FLJ77548, highly similar to Homo sapiens bin3, bicoid-interacting 3, homolog (Drosophila) (BCDIN3), mRNA OS=Homo sapiens O	0.922319	0.47872
1576	B4DMD1;Q7Z334;A0A286YEZ8			tr|B4DMD1|B4DMD1_HUMAN cDNA FLJ53360, highly similar to Heterogeneous nuclear ribonucleoprotein R OS=Homo sapiens OX=9606 PE=2 SV=1	-0.522934	0.348427
183	A0A1S5UZ17;A0A024R2K4;Q9Y608-2;Q9Y608-4;Q9Y608-5;Q9Y608;Q9Y608-3;H7C3N9;C9JSU1;B4DPC0;Q05D04;A0A0F7NGI8;Q32MZ4-4;Q32MZ4-3;Q32MZ4-2;Q32MZ4	Leucine-rich repeat flightless-interacting protein 2	LRRFIP2	tr|A0A1S5UZ17|A0A1S5UZ17_HUMAN Leucine-rich repeat flightless-interacting protein 2 OS=Homo sapiens OX=9606 GN=LRRFIP2 PE=2 SV=1;tr|A0A024R2K4|A0A024R2K4_HUMAN Leucine rich repeat (In FLII) interacting protein 2, isoform CRA_b OS=Homo sapiens OX=9606 GN=LR	20.4868	0.60206
2238	Q5J7U2;O95478;A0A0A0MQZ6;H0YAI9	Ribosome biogenesis protein NSA2 homolog	CDK105;NSA2	tr|Q5J7U2|Q5J7U2_HUMAN TGF beta-inducible nuclear protein 1 OS=Homo sapiens OX=9606 GN=CDK105 PE=2 SV=1;sp|O95478|NSA2_HUMAN Ribosome biogenesis protein NSA2 homolog OS=Homo sapiens OX=9606 GN=NSA2 PE=1 SV=1;tr|A0A0A0MQZ6|A0A0A0MQZ6_HUMAN Ribosome biogenes	-4.09533	0.821475
1977	H0YJA2;Q6PJT7-3;Q6PJT7-11;Q6PJT7-9;Q6PJT7-2;A0A024R6F2;G3V256;Q6PJT7-4;Q6PJT7-5;Q6PJT7;G3V5I6;Q6PJT7-10;G3V3Y4;G3V3R9;H0YJ87;A0A087WTC9;Q6PJT7-6	Zinc finger CCCH domain-containing protein 14	ZC3H14;FLJ11806	tr|H0YJA2|H0YJA2_HUMAN Zinc finger CCCH domain-containing protein 14 (Fragment) OS=Homo sapiens OX=9606 GN=ZC3H14 PE=1 SV=1;sp|Q6PJT7-3|ZC3HE_HUMAN Isoform 3 of Zinc finger CCCH domain-containing protein 14 OS=Homo sapiens OX=9606 GN=ZC3H14;sp|Q6PJT7-11|ZC	-1.41022	0.458838
2874	Q5VT52-2;Q5VT52-3;Q5VT52;Q5VT52-5;Q5VT52-4	Regulation of nuclear pre-mRNA domain-containing protein 2	RPRD2	sp|Q5VT52-2|RPRD2_HUMAN Isoform 2 of Regulation of nuclear pre-mRNA domain-containing protein 2 OS=Homo sapiens OX=9606 GN=RPRD2;sp|Q5VT52-3|RPRD2_HUMAN Isoform 3 of Regulation of nuclear pre-mRNA domain-containing protein 2 OS=Homo sapiens OX=9606 GN=RPRD	-4.07583	1.10838
2036	J3KN67;A0A2R2Y2Q3;M1VPF4;P06753;B4DQ80;Q8NAH0;P06753-7;Q6LDX7;Q5VU62;K7EP68;Q8NI98;A0A024R4K5	Tyrosine-protein kinase receptor;Tropomyosin alpha-3 chain	TPM3;TPM3-ROS1	tr|J3KN67|J3KN67_HUMAN Tropomyosin alpha-3 chain OS=Homo sapiens OX=9606 GN=TPM3 PE=1 SV=1;tr|A0A2R2Y2Q3|A0A2R2Y2Q3_HUMAN Tropomyosin 3 nu OS=Homo sapiens OX=9606 GN=TPM3nu PE=2 SV=1;tr|M1VPF4|M1VPF4_HUMAN Tyrosine-protein kinase receptor OS=Homo sapiens O	20.801	0.60206
2602	P82932	28S ribosomal protein S6, mitochondrial	MRPS6	sp|P82932|RT06_HUMAN 28S ribosomal protein S6, mitochondrial OS=Homo sapiens OX=9606 GN=MRPS6 PE=1 SV=3	20.9009	0.60206
1911	F5GWA4		KCTD10	tr|F5GWA4|F5GWA4_HUMAN BTB/POZ domain-containing adapter for CUL3-mediated RhoA degradation protein 3 OS=Homo sapiens OX=9606 GN=KCTD10 PE=1 SV=1	21.0566	0.60206
2697	Q14157-4;Q14157-1;B4DYY5;F8W726;Q14157-3;Q14157;Q14157-5;B4DZJ6;Q5VU77;Q5VU79;Q5VU78;Q5VU81;Q5VU80;H0Y5H6;H7C2T8	Ubiquitin-associated protein 2-like	UBAP2L	sp|Q14157-4|UBP2L_HUMAN Isoform 4 of Ubiquitin-associated protein 2-like OS=Homo sapiens OX=9606 GN=UBAP2L;sp|Q14157-1|UBP2L_HUMAN Isoform 2 of Ubiquitin-associated protein 2-like OS=Homo sapiens OX=9606 GN=UBAP2L;tr|B4DYY5|B4DYY5_HUMAN cDNA FLJ55671, high	-5.92769	0.882033
2664	Q13151	Heterogeneous nuclear ribonucleoprotein A0	HNRNPA0	sp|Q13151|ROA0_HUMAN Heterogeneous nuclear ribonucleoprotein A0 OS=Homo sapiens OX=9606 GN=HNRNPA0 PE=1 SV=1	-1.67149	0.825068
882	Q502X2;A0A0S2Z5U7;Q9NR28-2;Q9NR28;A0A024RBT2;Q53HB7;K7X1S0;A0A0S2Z5P6;Q9NR28-3;H7BZK7;A0A2U3TZH2;H7BZQ7	Diablo homolog, mitochondrial	DIABLO	tr|Q502X2|Q502X2_HUMAN Diablo homolog (Drosophila) OS=Homo sapiens OX=9606 GN=DIABLO PE=2 SV=1;tr|A0A0S2Z5U7|A0A0S2Z5U7_HUMAN Diablo-like protein isoform 1 (Fragment) OS=Homo sapiens OX=9606 GN=DIABLO PE=2 SV=1;sp|Q9NR28-2|DBLOH_HUMAN Isoform 2 of Diablo h	-3.55019	1.08777
398	A0A024R8A7;Q96I24;Q96I24-2	Far upstream element-binding protein 3	hCG_31253;FUBP3	tr|A0A024R8A7|A0A024R8A7_HUMAN HCG31253, isoform CRA_a OS=Homo sapiens OX=9606 GN=hCG_31253 PE=4 SV=1;sp|Q96I24|FUBP3_HUMAN Far upstream element-binding protein 3 OS=Homo sapiens OX=9606 GN=FUBP3 PE=1 SV=2;sp|Q96I24-2|FUBP3_HUMAN Isoform 2 of Far upstream	-2.77225	0.966428
2542	P61964;V9GZ59;V9GYQ5	WD repeat-containing protein 5	WDR5	sp|P61964|WDR5_HUMAN WD repeat-containing protein 5 OS=Homo sapiens OX=9606 GN=WDR5 PE=1 SV=1	-2.55538	0.684163
3358	Q9UKF6;G5E9W3;Q05BZ5;C9JZH6	Cleavage and polyadenylation specificity factor subunit 3	CPSF3	sp|Q9UKF6|CPSF3_HUMAN Cleavage and polyadenylation specificity factor subunit 3 OS=Homo sapiens OX=9606 GN=CPSF3 PE=1 SV=1;tr|G5E9W3|G5E9W3_HUMAN Cleavage and polyadenylation specific factor 3, 73kDa, isoform CRA_b OS=Homo sapiens OX=9606 GN=CPSF3 PE=1 SV=	-4.96162	1.66888
1089	A0PJI7;Q86X95;Q86X95-2	Corepressor interacting with RBPJ 1	CIR;CIR1	tr|A0PJI7|A0PJI7_HUMAN CIR protein (Fragment) OS=Homo sapiens OX=9606 GN=CIR PE=2 SV=1;sp|Q86X95|CIR1_HUMAN Corepressor interacting with RBPJ 1 OS=Homo sapiens OX=9606 GN=CIR1 PE=1 SV=1	-0.89744	0.772412
2426	Q53Y06;P36543-2;P36543;C9J8H1;P36543-3	V-type proton ATPase subunit E 1	ATP6V1E1	tr|Q53Y06|Q53Y06_HUMAN ATPase, H+ transporting, lysosomal 31kDa, V1 subunit E isoform 1 OS=Homo sapiens OX=9606 GN=ATP6V1E1 PE=2 SV=1;sp|P36543-2|VATE1_HUMAN Isoform 2 of V-type proton ATPase subunit E 1 OS=Homo sapiens OX=9606 GN=ATP6V1E1;sp|P36543|VATE1_	21.9163	0.60206
1989	H3BP04		UQCRC2	tr|H3BP04|H3BP04_HUMAN Cytochrome b-c1 complex subunit 2, mitochondrial (Fragment) OS=Homo sapiens OX=9606 GN=UQCRC2 PE=1 SV=1	22.217	0.60206
2071	K7EN45;Q13526;Q49AR7;K7EMU7;B3KUM4	Peptidyl-prolyl cis-trans isomerase NIMA-interacting 1	PIN1	tr|K7EN45|K7EN45_HUMAN Peptidyl-prolyl cis-trans isomerase (Fragment) OS=Homo sapiens OX=9606 GN=PIN1 PE=1 SV=1;sp|Q13526|PIN1_HUMAN Peptidyl-prolyl cis-trans isomerase NIMA-interacting 1 OS=Homo sapiens OX=9606 GN=PIN1 PE=1 SV=1	2.11666	0.525608
2587	P68431	Histone H3.1	HIST1H3A	sp|P68431|H31_HUMAN Histone H3.1 OS=Homo sapiens OX=9606 GN=HIST1H3A PE=1 SV=2	22.9432	0.60206
2548	V9HW04;P62140;B4DJ75;B7ZB67;E7ETD8;B4E163;C9J9S3;C9JP48;H0Y3Y6;C4TNW6;F8WE71;F8W1A0;C4TNW5	Serine/threonine-protein phosphatase;Serine/threonine-protein phosphatase PP1-beta catalytic subunit	HEL-S-80p;PPP1CB	tr|V9HW04|V9HW04_HUMAN Serine/threonine-protein phosphatase OS=Homo sapiens OX=9606 GN=HEL-S-80p PE=2 SV=1;sp|P62140|PP1B_HUMAN Serine/threonine-protein phosphatase PP1-beta catalytic subunit OS=Homo sapiens OX=9606 GN=PPP1CB PE=1 SV=3;tr|B4DJ75|B4DJ75_HUM	-3.97421	1.17277
2345	P18077;F8WBS5;F8WB72;C9K025	60S ribosomal protein L35a	RPL35A	sp|P18077|RL35A_HUMAN 60S ribosomal protein L35a OS=Homo sapiens OX=9606 GN=RPL35A PE=1 SV=2;tr|F8WBS5|F8WBS5_HUMAN 60S ribosomal protein L35a OS=Homo sapiens OX=9606 GN=RPL35A PE=1 SV=1;tr|F8WB72|F8WB72_HUMAN 60S ribosomal protein L35a OS=Homo sapiens OX=	-1.07214	1.53109
2221	O95036		WUGSC:H_RG054D04.1	tr|O95036|O95036_HUMAN Similar to 60S ribosomal protein L7; similar to P18124 (PID:d133021) OS=Homo sapiens OX=9606 GN=WUGSC:H_RG054D04.1 PE=4 SV=1	24.0098	0.60206
1874	Q86U62;Q6IBT1;E9KL30;Q99436;B2RAQ9;Q5TBG5;Q99436-2	Proteasome subunit beta type;Proteasome subunit beta type-7	PSMB7	tr|Q86U62|Q86U62_HUMAN Proteasome subunit beta type OS=Homo sapiens OX=9606 PE=2 SV=1;tr|Q6IBT1|Q6IBT1_HUMAN Proteasome subunit beta type OS=Homo sapiens OX=9606 GN=PSMB7 PE=2 SV=1;tr|E9KL30|E9KL30_HUMAN Proteasome subunit beta type OS=Homo sapiens OX=9606	0.134506	0.864014
2947	Q71DI3	Histone H3.2	HIST2H3A	sp|Q71DI3|H32_HUMAN Histone H3.2 OS=Homo sapiens OX=9606 GN=HIST2H3A PE=1 SV=3	24.9047	0.60206
708	A0A0A0MQX1;Q9HD67;D6RGD1;Q69YP8;B4E0P0;B4DIJ5;Q8NCI3;E9PEW5;B7ZA23;B7Z3D4;Q9HD67-3	Unconventional myosin-X	MYO10;DKFZp762A083	tr|A0A0A0MQX1|A0A0A0MQX1_HUMAN Unconventional myosin-X OS=Homo sapiens OX=9606 GN=MYO10 PE=1 SV=1;sp|Q9HD67|MYO10_HUMAN Unconventional myosin-X OS=Homo sapiens OX=9606 GN=MYO10 PE=1 SV=3;tr|D6RGD1|D6RGD1_HUMAN Unconventional myosin-X (Fragment) OS=Homo sap	1.56361	0.568331
778	A0A2R8YDW2;A0A2R8Y4X2;A0A2R8YD40;A0A2R8YDJ9;B3KY63;A0A2R8Y425;A0A2R8Y5J0;A0A2R8YFK9;A0A2U3TZM0;A0A2R8YFD8;F5GWX5;A0A2R8Y212;A0A2R8Y521;A0A0C4DGG9;Q14839;Q14839-2;A0A2R8YER1;A0A2R8Y8C1;A0A2R8Y685;A0A2R8Y5Z7;A0A2R8Y8B3;A0A2R8Y5M9;A0A2R8Y7M9;A0A2R8Y7I0;Q12873-2;Q12873;Q12873-3;A0A2R8Y445;A0A2R8YE38;B4DLC6;B3KRD4;Q659F1;K7EMY3;Q659D0;Q8TDI0	Chromodomain-helicase-DNA-binding protein 4	CHD4	tr|A0A2R8YDW2|A0A2R8YDW2_HUMAN Chromodomain-helicase-DNA-binding protein 4 (Fragment) OS=Homo sapiens OX=9606 GN=CHD4 PE=1 SV=1;tr|A0A2R8Y4X2|A0A2R8Y4X2_HUMAN Chromodomain-helicase-DNA-binding protein 4 (Fragment) OS=Homo sapiens OX=9606 GN=CHD4 PE=1 SV=1;	13.8333	0.585683
2680	Q13535-2;Q13535-3;Q13535;D6RIG7	Serine/threonine-protein kinase ATR	ATR	sp|Q13535-2|ATR_HUMAN Isoform 2 of Serine/threonine-protein kinase ATR OS=Homo sapiens OX=9606 GN=ATR;sp|Q13535-3|ATR_HUMAN Isoform 3 of Serine/threonine-protein kinase ATR OS=Homo sapiens OX=9606 GN=ATR;sp|Q13535|ATR_HUMAN Serine/threonine-protein kinase	14.1571	0.478301
2376	P24928;P24928-2;Q15161;B4DET1	DNA-directed RNA polymerase II subunit RPB1	POLR2A	sp|P24928|RPB1_HUMAN DNA-directed RNA polymerase II subunit RPB1 OS=Homo sapiens OX=9606 GN=POLR2A PE=1 SV=2	-3.84817	1.96853
3283	Q9NU22;Q5T795;Q6AI22;Q6ZVV6;Q6PJJ1	Midasin	MDN1	sp|Q9NU22|MDN1_HUMAN Midasin OS=Homo sapiens OX=9606 GN=MDN1 PE=1 SV=2	0.662667	1.65423
3378	Q9UPU5	Ubiquitin carboxyl-terminal hydrolase 24	USP24	sp|Q9UPU5|UBP24_HUMAN Ubiquitin carboxyl-terminal hydrolase 24 OS=Homo sapiens OX=9606 GN=USP24 PE=1 SV=3	14.9983	0.418965
1005	B7ZM73;A0A286YFF8;Q7Z3U7-2;Q7Z3U7-6;Q7Z3U7-5;Q7Z3U7;Q7Z3U7-3;B3KMU1;F8VZV1	Protein MON2 homolog	MON2	tr|B7ZM73|B7ZM73_HUMAN MON2 protein OS=Homo sapiens OX=9606 GN=MON2 PE=2 SV=1;tr|A0A286YFF8|A0A286YFF8_HUMAN Protein MON2 homolog OS=Homo sapiens OX=9606 GN=MON2 PE=1 SV=1;sp|Q7Z3U7-2|MON2_HUMAN Isoform 2 of Protein MON2 homolog OS=Homo sapiens OX=9606 GN=	-3.71562	1.51922
1191	A8K321;B4DZ55;Q6ZXV5-2;Q6ZXV5;F8VRY4;F8W044	Transmembrane and TPR repeat-containing protein 3	TMTC3	tr|A8K321|A8K321_HUMAN cDNA FLJ78524, highly similar to Homo sapiens SMILE protein (SMILE), mRNA OS=Homo sapiens OX=9606 PE=2 SV=1;tr|B4DZ55|B4DZ55_HUMAN cDNA FLJ52097, weakly similar to Homo sapiens transmembrane and tetratricopeptide repeat containing 1	-1.46389	0.85217
3270	Q9NR09;Q9H8B7	Baculoviral IAP repeat-containing protein 6	BIRC6	sp|Q9NR09|BIRC6_HUMAN Baculoviral IAP repeat-containing protein 6 OS=Homo sapiens OX=9606 GN=BIRC6 PE=1 SV=2	0.0688036	0.438696
2886	Q69YN4;Q69YN4-3;Q69YN4-2;Q69YN4-4;H0YBN5;H0YB68	Protein virilizer homolog	KIAA1429	sp|Q69YN4|VIR_HUMAN Protein virilizer homolog OS=Homo sapiens OX=9606 GN=VIRMA PE=1 SV=2;sp|Q69YN4-3|VIR_HUMAN Isoform 3 of Protein virilizer homolog OS=Homo sapiens OX=9606 GN=VIRMA;sp|Q69YN4-2|VIR_HUMAN Isoform 2 of Protein virilizer homolog OS=Homo sapi	-6.14198	0.931871
2933	Q6WCQ1;Q6WCQ1-2;B9EGI2;U6FSN9;Q6WCQ1-3;J3KSW8;Q8N236;J3KSK7;A0A1W2PPU9;K7EJ14	Myosin phosphatase Rho-interacting protein;Tyrosine-protein kinase receptor	MPRIP;Mprip-Ntrk1 fusion gene	sp|Q6WCQ1|MPRIP_HUMAN Myosin phosphatase Rho-interacting protein OS=Homo sapiens OX=9606 GN=MPRIP PE=1 SV=3;sp|Q6WCQ1-2|MPRIP_HUMAN Isoform 2 of Myosin phosphatase Rho-interacting protein OS=Homo sapiens OX=9606 GN=MPRIP;tr|B9EGI2|B9EGI2_HUMAN Myosin phosp	-5.05027	1.02294
2141	O15439-2;O15439;Q59GY6;A8K2Q2;O15439-4;O15439-3;B7Z5H4;A0A2R8YDC1;A0A2R8Y6V8;O75555	Multidrug resistance-associated protein 4	ABCC4;MOAT-B	sp|O15439-2|MRP4_HUMAN Isoform 2 of Multidrug resistance-associated protein 4 OS=Homo sapiens OX=9606 GN=ABCC4;sp|O15439|MRP4_HUMAN Multidrug resistance-associated protein 4 OS=Homo sapiens OX=9606 GN=ABCC4 PE=1 SV=3;tr|Q59GY6|Q59GY6_HUMAN ABCC4 protein va	1.87292	0.639993
1556	B4DJ85;Q92990-2;Q92990;M0QX84;M0QXG8	Glomulin	GLMN	tr|B4DJ85|B4DJ85_HUMAN cDNA FLJ60587, highly similar to Glomulin OS=Homo sapiens OX=9606 PE=2 SV=1;sp|Q92990-2|GLMN_HUMAN Isoform 2 of Glomulin OS=Homo sapiens OX=9606 GN=GLMN;sp|Q92990|GLMN_HUMAN Glomulin OS=Homo sapiens OX=9606 GN=GLMN PE=1 SV=2;tr|M0QX8	15.7128	0.60206
2729	Q15149-4;Q8WXV6	Plectin	PLEC	sp|Q15149-4|PLEC_HUMAN Isoform 4 of Plectin OS=Homo sapiens OX=9606 GN=PLEC	15.7479	0.60206
3356	Q9UK61-3;Q9UK61-4;Q9UK61;A0A024R363;Q9UK61-2	Protein FAM208A	FAM208A;C3orf63	sp|Q9UK61-3|TASOR_HUMAN Isoform 3 of Protein TASOR OS=Homo sapiens OX=9606 GN=FAM208A;sp|Q9UK61-4|TASOR_HUMAN Isoform 4 of Protein TASOR OS=Homo sapiens OX=9606 GN=FAM208A;sp|Q9UK61|TASOR_HUMAN Protein TASOR OS=Homo sapiens OX=9606 GN=FAM208A PE=1 SV=3;tr|	16.8353	2.2006
747	A0A0A0MTP6;O15357-2;O15357;F5GY16	Phosphatidylinositol 3,4,5-trisphosphate 5-phosphatase 2	INPPL1	tr|A0A0A0MTP6|A0A0A0MTP6_HUMAN Phosphatidylinositol 3,4,5-trisphosphate 5-phosphatase 2 OS=Homo sapiens OX=9606 GN=INPPL1 PE=1 SV=1;sp|O15357-2|SHIP2_HUMAN Isoform 2 of Phosphatidylinositol 3,4,5-trisphosphate 5-phosphatase 2 OS=Homo sapiens OX=9606 GN=INP	16.7417	1.70399
342	A0A0C4DG51;A8K6U0;A0A024R746;Q9NP80-3;Q9NP80-2;Q9NP80	Calcium-independent phospholipase A2-gamma	PNPLA8;IPLA2(GAMMA)	tr|A0A0C4DG51|A0A0C4DG51_HUMAN Calcium-independent phospholipase A2-gamma (Fragment) OS=Homo sapiens OX=9606 GN=PNPLA8 PE=1 SV=1;tr|A8K6U0|A8K6U0_HUMAN cDNA FLJ77572, highly similar to Homo sapiens intracellular membrane-associated calcium-independent phos	15.8908	0.60206
740	A0A0A0MTR7;A0A0A0MTC1;Q63HN8;Q63HN8-4;Q63HN8-6;A0A024R8W2;Q6ZRW9;Q63HN8-5	E3 ubiquitin-protein ligase RNF213	RNF213	tr|A0A0A0MTR7|A0A0A0MTR7_HUMAN E3 ubiquitin-protein ligase RNF213 OS=Homo sapiens OX=9606 GN=RNF213 PE=1 SV=1;tr|A0A0A0MTC1|A0A0A0MTC1_HUMAN E3 ubiquitin-protein ligase RNF213 OS=Homo sapiens OX=9606 GN=RNF213 PE=1 SV=1;sp|Q63HN8|RN213_HUMAN E3 ubiquitin-p	2.31619	0.310584
1661	B4E205;O95486;O95486-2	Protein transport protein Sec24A	SEC24A	tr|B4E205|B4E205_HUMAN cDNA FLJ61651, highly similar to Protein transport protein Sec24A OS=Homo sapiens OX=9606 PE=2 SV=1;sp|O95486|SC24A_HUMAN Protein transport protein Sec24A OS=Homo sapiens OX=9606 GN=SEC24A PE=1 SV=2	-0.114454	0.310793
2731	Q15269;A0A0B4J2E5;C9J544;A0A096LPI6	Periodic tryptophan protein 2 homolog	PWP2	sp|Q15269|PWP2_HUMAN Periodic tryptophan protein 2 homolog OS=Homo sapiens OX=9606 GN=PWP2 PE=2 SV=2;tr|A0A0B4J2E5|A0A0B4J2E5_HUMAN Uncharacterized protein OS=Homo sapiens OX=9606 GN=LOC102724159 PE=1 SV=1	16.118	0.60206
3419	Q9Y5Q9;H7C0C0	General transcription factor 3C polypeptide 3	GTF3C3	sp|Q9Y5Q9|TF3C3_HUMAN General transcription factor 3C polypeptide 3 OS=Homo sapiens OX=9606 GN=GTF3C3 PE=1 SV=1	0.261622	0.395161
794	Q4W5T8;A0A0D9SF60;Q99569-2;Q99569;Q6LCG8;B4DJU1;B3KXF4;B4DG58;B4DRK2;E9PHB5;B1P762;E7EPC8;Q9UQB3-2;Q9UQB3	Plakophilin-4	PKP4	tr|Q4W5T8|Q4W5T8_HUMAN Uncharacterized protein PKP4 (Fragment) OS=Homo sapiens OX=9606 GN=PKP4 PE=4 SV=1;tr|A0A0D9SF60|A0A0D9SF60_HUMAN Plakophilin-4 OS=Homo sapiens OX=9606 GN=PKP4 PE=1 SV=1;sp|Q99569-2|PKP4_HUMAN Isoform 2 of Plakophilin-4 OS=Homo sapien	1.39115	0.716347
686	B7Z7L9;A0A087X1B2;B9A018;Q53GS9-2;Q53GS9;B3KPG7;B3KMG1;Q53GS9-3	U4/U6.U5 tri-snRNP-associated protein 2	USP39	tr|B7Z7L9|B7Z7L9_HUMAN cDNA FLJ56173, highly similar to U4/U6.U5 tri-snRNP-associated protein 2 OS=Homo sapiens OX=9606 PE=2 SV=1;tr|A0A087X1B2|A0A087X1B2_HUMAN U4/U6.U5 tri-snRNP-associated protein 2 OS=Homo sapiens OX=9606 GN=USP39 PE=1 SV=1;tr|B9A018|B9	16.1816	0.60206
1285	A8K9T5;Q9H0M0-6;Q9H0M0-3;Q9H0M0;H0YBA4	E3 ubiquitin-protein ligase;NEDD4-like E3 ubiquitin-protein ligase WWP1	WWP1	tr|A8K9T5|A8K9T5_HUMAN E3 ubiquitin-protein ligase OS=Homo sapiens OX=9606 PE=2 SV=1;sp|Q9H0M0-6|WWP1_HUMAN Isoform 6 of NEDD4-like E3 ubiquitin-protein ligase WWP1 OS=Homo sapiens OX=9606 GN=WWP1;sp|Q9H0M0-3|WWP1_HUMAN Isoform 3 of NEDD4-like E3 ubiquitin	16.1822	0.60206
1139	A5YKK6-3;A5YKK6-2;A5YKK6;B4DYL7;A5YKK6-4;H3BMZ2;B3KS60;B4DTM8;B7Z6X2;B3KPW6	CCR4-NOT transcription complex subunit 1	CNOT1	sp|A5YKK6-3|CNOT1_HUMAN Isoform 3 of CCR4-NOT transcription complex subunit 1 OS=Homo sapiens OX=9606 GN=CNOT1;sp|A5YKK6-2|CNOT1_HUMAN Isoform 2 of CCR4-NOT transcription complex subunit 1 OS=Homo sapiens OX=9606 GN=CNOT1;sp|A5YKK6|CNOT1_HUMAN CCR4-NOT tra	0.461837	0.60206
2645	Q53EL1;Q12768;E7EQI7;B4DLF2;E5RFU6	WASH complex subunit strumpellin	KIAA0196	tr|Q53EL1|Q53EL1_HUMAN Protein KIAA0196 variant (Fragment) OS=Homo sapiens OX=9606 PE=2 SV=1;sp|Q12768|WASC5_HUMAN WASH complex subunit 5 OS=Homo sapiens OX=9606 GN=WASHC5 PE=1 SV=1;tr|E7EQI7|E7EQI7_HUMAN WASH complex subunit 5 OS=Homo sapiens OX=9606 GN=W	16.2662	0.60206
656	A0A0G2JP90;A0A087WW46;J3KN36;A0A0G2JN29;A0A087X117;Q5JPE7-3;Q5JPE7-2;Q15155;P69849;Q5JPE7;H3BUC9;Q9H049;A0A087WTD5;Q1LZN2	Nodal modulator 2;Nodal modulator 1;Nodal modulator 3	NOMO1;NOMO3;NOMO2	tr|A0A0G2JP90|A0A0G2JP90_HUMAN Nodal modulator 1 OS=Homo sapiens OX=9606 GN=NOMO1 PE=1 SV=1;tr|A0A087WW46|A0A087WW46_HUMAN Nodal modulator 1 OS=Homo sapiens OX=9606 GN=NOMO1 PE=1 SV=1;tr|J3KN36|J3KN36_HUMAN Nodal modulator 3 OS=Homo sapiens OX=9606 GN=NOMO	-0.0358825	0.455379
3352	Q9UJX6-2;Q9UJX6;B4DGH7	Anaphase-promoting complex subunit 2	ANAPC2	sp|Q9UJX6-2|ANC2_HUMAN Isoform 2 of Anaphase-promoting complex subunit 2 OS=Homo sapiens OX=9606 GN=ANAPC2;sp|Q9UJX6|ANC2_HUMAN Anaphase-promoting complex subunit 2 OS=Homo sapiens OX=9606 GN=ANAPC2 PE=1 SV=1;tr|B4DGH7|B4DGH7_HUMAN cDNA FLJ58169, highly si	16.2888	0.60206
386	A0A024R870;Q6UWE0;Q6UWE0-2;Q6UWE0-3	E3 ubiquitin-protein ligase LRSAM1	LRSAM1	tr|A0A024R870|A0A024R870_HUMAN Leucine rich repeat and sterile alpha motif containing 1, isoform CRA_a OS=Homo sapiens OX=9606 GN=LRSAM1 PE=4 SV=1;sp|Q6UWE0|LRSM1_HUMAN E3 ubiquitin-protein ligase LRSAM1 OS=Homo sapiens OX=9606 GN=LRSAM1 PE=1 SV=1;sp|Q6UWE	19.5217	0.733065
2916	Q6P2H3-2;Q6P2H3-4;Q6P2H3;H7BZW2;Q9NTB2;Q6P2H3-3	Centrosomal protein of 85 kDa	CEP85;DKFZp434P232	sp|Q6P2H3-2|CEP85_HUMAN Isoform 2 of Centrosomal protein of 85 kDa OS=Homo sapiens OX=9606 GN=CEP85;sp|Q6P2H3-4|CEP85_HUMAN Isoform 4 of Centrosomal protein of 85 kDa OS=Homo sapiens OX=9606 GN=CEP85;sp|Q6P2H3|CEP85_HUMAN Centrosomal protein of 85 kDa OS=H	18.5803	0.80336
719	Q86UA8;A0A0A0MRP6;B7ZLQ5;P28370-2;P28370;D7EZH4	Probable global transcription activator SNF2L1	SMARCA1	tr|Q86UA8|Q86UA8_HUMAN SMARCA1 protein (Fragment) OS=Homo sapiens OX=9606 GN=SMARCA1 PE=2 SV=2;tr|A0A0A0MRP6|A0A0A0MRP6_HUMAN Probable global transcription activator SNF2L1 OS=Homo sapiens OX=9606 GN=SMARCA1 PE=1 SV=1;tr|B7ZLQ5|B7ZLQ5_HUMAN Probable global	16.4723	0.60206
2219	O94915;F2Z2S2;Q6AI58;Q6ZR29;H0Y9X0;D6RJI4;B3KXG5;A0A286YEZ9;A0A2C9F2R7	Protein furry homolog-like	FRYL	sp|O94915|FRYL_HUMAN Protein furry homolog-like OS=Homo sapiens OX=9606 GN=FRYL PE=1 SV=2;tr|F2Z2S2|F2Z2S2_HUMAN Protein furry homolog-like OS=Homo sapiens OX=9606 GN=FRYL PE=1 SV=1	3.42928	0.82774
1225	A8K548;C9JFV4;B4DR36;Q8IZL8;I3L445;O15451;E7EV54;B4DEX7;I3L1P4;I3L4M7;I3L4P1	Proline-, glutamic acid- and leucine-rich protein 1	PELP1	tr|A8K548|A8K548_HUMAN cDNA FLJ75008, highly similar to Homo sapiens proline-, glutamic acid-, leucine-rich protein 1 (PELP1), mRNA OS=Homo sapiens OX=9606 PE=2 SV=1;tr|C9JFV4|C9JFV4_HUMAN Proline-, glutamic acid- and leucine-rich protein 1 OS=Homo sapiens	16.4986	0.60206
1993	H3BSH7;Q969X6;A0A0J9YWM9;Q969X6-2;A0A0J9YXV4;Q969X6-3;H3BRM8;A0A0J9YWK2;H3BPD7;I3L4T9	Cirhin	CIRH1A	tr|H3BSH7|H3BSH7_HUMAN U3 small nucleolar RNA-associated protein 4 homolog (Fragment) OS=Homo sapiens OX=9606 GN=UTP4 PE=1 SV=1;sp|Q969X6|UTP4_HUMAN U3 small nucleolar RNA-associated protein 4 homolog OS=Homo sapiens OX=9606 GN=UTP4 PE=1 SV=1;tr|A0A0J9YWM9	18.6186	0.802731
3431	Q9Y6X3;Q9Y4B3;V9GZ52;V9GYS3;Q9Y6X3-3;Q9Y6X3-2	MAU2 chromatid cohesion factor homolog	MAU2	sp|Q9Y6X3|SCC4_HUMAN MAU2 chromatid cohesion factor homolog OS=Homo sapiens OX=9606 GN=MAU2 PE=1 SV=2;tr|Q9Y4B3|Q9Y4B3_HUMAN R29828_1 (Fragment) OS=Homo sapiens OX=9606 PE=4 SV=1	17.8911	1.19066
938	A0A140VK12;Q9UBF2;Q9H9B7;Q9UBF2-2;Q9NUP3;B3KND4;Q9H279	Coatomer subunit gamma-2;Coatomer subunit gamma	COPG2	tr|A0A140VK12|A0A140VK12_HUMAN Coatomer subunit gamma OS=Homo sapiens OX=9606 PE=2 SV=1;sp|Q9UBF2|COPG2_HUMAN Coatomer subunit gamma-2 OS=Homo sapiens OX=9606 GN=COPG2 PE=1 SV=1;tr|Q9H9B7|Q9H9B7_HUMAN Coatomer subunit gamma OS=Homo sapiens OX=9606 PE=2 SV=	-1.97057	1.75496
2419	P35606-2;P35606;B4E2C9;D6RBZ7;D6RCL6;D6RBG7;D6RBT6;H0YAC7;D6R997;H0Y938	Coatomer subunit beta	COPB2	sp|P35606-2|COPB2_HUMAN Isoform 2 of Coatomer subunit beta OS=Homo sapiens OX=9606 GN=COPB2;sp|P35606|COPB2_HUMAN Coatomer subunit beta OS=Homo sapiens OX=9606 GN=COPB2 PE=1 SV=2	-3.44231	1.08649
1246	B7Z806;B7Z6I6;Q53ER0;A8K6K7;P13807-2;P13807;B7Z8P0;B7Z255	Glycogen [starch] synthase, muscle	GYS1	tr|B7Z806|B7Z806_HUMAN Glycogen [starch] synthase OS=Homo sapiens OX=9606 PE=2 SV=1;tr|B7Z6I6|B7Z6I6_HUMAN Glycogen [starch] synthase OS=Homo sapiens OX=9606 PE=2 SV=1;tr|Q53ER0|Q53ER0_HUMAN Glycogen [starch] synthase (Fragment) OS=Homo sapiens OX=9606 PE=	16.5978	0.60206
3011	Q8IY17-5;Q8IY17-2;Q8IY17-3;Q8IY17;M0R2C2;B4DEV3	Neuropathy target esterase	PNPLA6	sp|Q8IY17-5|PLPL6_HUMAN Isoform 5 of Neuropathy target esterase OS=Homo sapiens OX=9606 GN=PNPLA6;sp|Q8IY17-2|PLPL6_HUMAN Isoform 2 of Neuropathy target esterase OS=Homo sapiens OX=9606 GN=PNPLA6;sp|Q8IY17-3|PLPL6_HUMAN Isoform 3 of Neuropathy target ester	-2.72329	0.571238
1821	D3DV75;H0YCK3;P55265-3;P55265-2	Double-stranded RNA-specific adenosine deaminase	ADAR	tr|D3DV75|D3DV75_HUMAN Adenosine deaminase, RNA-specific, isoform CRA_b OS=Homo sapiens OX=9606 GN=ADAR PE=4 SV=1;tr|H0YCK3|H0YCK3_HUMAN Double-stranded RNA-specific adenosine deaminase (Fragment) OS=Homo sapiens OX=9606 GN=ADAR PE=1 SV=1;sp|P55265-3|DSRAD	17.8008	1.61157
1387	B2RAR2;Q9ULX3;H3BUR4	RNA-binding protein NOB1	NOB1	tr|B2RAR2|B2RAR2_HUMAN cDNA, FLJ95064, highly similar to Homo sapiens nin one binding protein (NOB1P), mRNA OS=Homo sapiens OX=9606 PE=2 SV=1;sp|Q9ULX3|NOB1_HUMAN RNA-binding protein NOB1 OS=Homo sapiens OX=9606 GN=NOB1 PE=1 SV=1	-4.46573	0.944539
340	A0A024R732;Q13425;Q13425-2;H0YCS0;A0A140TA73;A0A0G2JM75;J3KT21;H7BY41	Beta-2-syntrophin	SNTB2	tr|A0A024R732|A0A024R732_HUMAN Syntrophin, beta 2 (Dystrophin-associated protein A1, 59kDa, basic component 2), isoform CRA_a OS=Homo sapiens OX=9606 GN=SNTB2 PE=4 SV=1;sp|Q13425|SNTB2_HUMAN Beta-2-syntrophin OS=Homo sapiens OX=9606 GN=SNTB2 PE=1 SV=1	-1.76966	0.66773
304	Q9UHS8;Q53HW7;B2R7T6;A0A024R5X2;Q9Y6N5;H3BNX3;H3BMS6;A0A1B0GXB4;H3BV36;H3BNP9	Sulfide:quinone oxidoreductase, mitochondrial	hCG_2001986;SQRDL	tr|Q9UHS8|Q9UHS8_HUMAN PRO1975 OS=Homo sapiens OX=9606 PE=2 SV=1;tr|Q53HW7|Q53HW7_HUMAN Sulfide dehydrogenase like (Fragment) OS=Homo sapiens OX=9606 PE=2 SV=1;tr|B2R7T6|B2R7T6_HUMAN cDNA, FLJ93596, highly similar to Homo sapiens sulfide quinone reductase-	18.3093	0.351945
2136	O15294;Q548W1;O15294-2;O15294-3;O15294-4;C9JZL3;B4DTL6	UDP-N-acetylglucosamine--peptide N-acetylglucosaminyltransferase 110 kDa subunit	OGT	sp|O15294|OGT1_HUMAN UDP-N-acetylglucosamine--peptide N-acetylglucosaminyltransferase 110 kDa subunit OS=Homo sapiens OX=9606 GN=OGT PE=1 SV=3;tr|Q548W1|Q548W1_HUMAN HRNT1 OS=Homo sapiens OX=9606 GN=OGT PE=2 SV=1;sp|O15294-2|OGT1_HUMAN Isoform 2 of UDP-N-a	-2.40533	1.11298
2647	Q12788;J3KNP2;A0A087WYP7;A0JLS5	Transducin beta-like protein 3	TBL3	sp|Q12788|TBL3_HUMAN Transducin beta-like protein 3 OS=Homo sapiens OX=9606 GN=TBL3 PE=1 SV=2;tr|J3KNP2|J3KNP2_HUMAN Transducin beta-like protein 3 (Fragment) OS=Homo sapiens OX=9606 GN=TBL3 PE=1 SV=1;tr|A0A087WYP7|A0A087WYP7_HUMAN Transducin beta-like pro	16.7726	0.60206
213	A0A024R3R5;Q14739;C9JXK0	Lamin-B receptor	LBR	tr|A0A024R3R5|A0A024R3R5_HUMAN Lamin B receptor, isoform CRA_a OS=Homo sapiens OX=9606 GN=LBR PE=4 SV=1;sp|Q14739|LBR_HUMAN Lamin-B receptor OS=Homo sapiens OX=9606 GN=LBR PE=1 SV=2	-2.32085	1.16729
2500	P52948-6;P52948-2;P52948-5;P52948;H7C3P6;H0YDF4;H0YCT1;H0YEN4;A0A1D8GZ64;B4DWF8;A0A142I7X2;A8KA17;A0A024RCC4;A0A1D8GZ56;P52948-4;P52948-3	Nuclear pore complex protein Nup98-Nup96;Nuclear pore complex protein Nup98;Nuclear pore complex protein Nup96	NUP98	sp|P52948-6|NUP98_HUMAN Isoform 6 of Nuclear pore complex protein Nup98-Nup96 OS=Homo sapiens OX=9606 GN=NUP98;sp|P52948-2|NUP98_HUMAN Isoform 2 of Nuclear pore complex protein Nup98-Nup96 OS=Homo sapiens OX=9606 GN=NUP98;sp|P52948-5|NUP98_HUMAN Isoform 5	-1.83906	0.904423
2064	K7EKI8;O60437;K7EQ71	Periplakin	PPL	tr|K7EKI8|K7EKI8_HUMAN Periplakin OS=Homo sapiens OX=9606 GN=PPL PE=1 SV=1;sp|O60437|PEPL_HUMAN Periplakin OS=Homo sapiens OX=9606 GN=PPL PE=1 SV=4;tr|K7EQ71|K7EQ71_HUMAN Periplakin (Fragment) OS=Homo sapiens OX=9606 GN=PPL PE=1 SV=1	22.9878	0.610348
1421	B2RDX5;D6RCA5;D6R9F8;D6RDJ6;D6RBR8;B7ZLP8;A2RTX5-2;A2RTX5			tr|B2RDX5|B2RDX5_HUMAN cDNA, FLJ96812, highly similar to Homo sapiens threonyl-tRNA synthetase (TARS), mRNA OS=Homo sapiens OX=9606 PE=1 SV=1	16.9027	0.60206
2497	P52735-3;P52735-2;P52735	Guanine nucleotide exchange factor VAV2	VAV2	sp|P52735-3|VAV2_HUMAN Isoform 3 of Guanine nucleotide exchange factor VAV2 OS=Homo sapiens OX=9606 GN=VAV2;sp|P52735-2|VAV2_HUMAN Isoform 2 of Guanine nucleotide exchange factor VAV2 OS=Homo sapiens OX=9606 GN=VAV2;sp|P52735|VAV2_HUMAN Guanine nucleotide	16.9052	0.60206
2950	Q71SV8;Q9HCS7;Q68CN2	Pre-mRNA-splicing factor SYF1	XAB2;DKFZp762C1015	tr|Q71SV8|Q71SV8_HUMAN Crn-related protein kim1 OS=Homo sapiens OX=9606 PE=2 SV=1;sp|Q9HCS7|SYF1_HUMAN Pre-mRNA-splicing factor SYF1 OS=Homo sapiens OX=9606 GN=XAB2 PE=1 SV=2;tr|Q68CN2|Q68CN2_HUMAN Uncharacterized protein DKFZp762C1015 (Fragment) OS=Homo s	1.2729	0.991021
1649	D3DQV9;Q59G42;B4DZF2;P78344;H0Y3P2;P78344-2;Q2TU89;H0YCH5;H0YD77;E9PKF8;Q3LIE0;H0YE22;H0YEC5;H0YE44;H0YCF8	Eukaryotic translation initiation factor 4 gamma 2	EIF4G2;AAG1	tr|D3DQV9|D3DQV9_HUMAN Eukaryotic translation initiation factor 4 gamma 2 (Fragment) OS=Homo sapiens OX=9606 GN=EIF4G2 PE=1 SV=1;tr|Q59G42|Q59G42_HUMAN Eukaryotic translation initiation factor 4 gamma, 2 variant (Fragment) OS=Homo sapiens OX=9606 PE=2 SV=1	-4.1133	1.21064
616	B4DVN5;A0A068F7M9;Q9Y613	FH1/FH2 domain-containing protein 1	FHOD1	tr|B4DVN5|B4DVN5_HUMAN cDNA FLJ55372, highly similar to FH1/FH2 domain-containing protein OS=Homo sapiens OX=9606 PE=2 SV=1;tr|A0A068F7M9|A0A068F7M9_HUMAN FH1/FH2 domain-containing protein 1 variant OS=Homo sapiens OX=9606 GN=FHOD1 PE=2 SV=1;sp|Q9Y613|FHOD	16.9528	0.60206
3075	Q8TEM1;Q8TEM1-2	Nuclear pore membrane glycoprotein 210	NUP210	sp|Q8TEM1|PO210_HUMAN Nuclear pore membrane glycoprotein 210 OS=Homo sapiens OX=9606 GN=NUP210 PE=1 SV=3;sp|Q8TEM1-2|PO210_HUMAN Isoform 2 of Nuclear pore membrane glycoprotein 210 OS=Homo sapiens OX=9606 GN=NUP210	-5.12783	0.620613
1813	D3DT96;Q9NVH2-3;Q9NVH2-2;Q9NVH2;Q9NVH2-4;A0A087WYC2	Integrator complex subunit 7	INTS7	tr|D3DT96|D3DT96_HUMAN Integrator complex subunit 7, isoform CRA_a OS=Homo sapiens OX=9606 GN=INTS7 PE=4 SV=1;sp|Q9NVH2-3|INT7_HUMAN Isoform 3 of Integrator complex subunit 7 OS=Homo sapiens OX=9606 GN=INTS7;sp|Q9NVH2-2|INT7_HUMAN Isoform 2 of Integrator c	-0.39269	0.60206
1572	B4DLN1;Q15693;P52815			tr|B4DLN1|B4DLN1_HUMAN cDNA FLJ60124, highly similar to Mitochondrial dicarboxylate carrier OS=Homo sapiens OX=9606 PE=2 SV=1	17.0412	0.60206
1825	D3DWB6;Q93008-1;Q93008;Q6P468;Q59EZ5;O00507;O00507-2;Q86X58;B4DGX9	Ubiquitin carboxyl-terminal hydrolase;Probable ubiquitin carboxyl-terminal hydrolase FAF-X	USP9X	tr|D3DWB6|D3DWB6_HUMAN Ubiquitin specific peptidase 9, X-linked, isoform CRA_b OS=Homo sapiens OX=9606 GN=USP9X PE=3 SV=1;sp|Q93008-1|USP9X_HUMAN Isoform 2 of Probable ubiquitin carboxyl-terminal hydrolase FAF-X OS=Homo sapiens OX=9606 GN=USP9X;sp|Q93008|U	-0.700359	0.699278
2878	Q5VW36;S4R400;B3KNV9;S4R3S9;S4R450;S4R3N8	Focadhesin	FOCAD	sp|Q5VW36|FOCAD_HUMAN Focadhesin OS=Homo sapiens OX=9606 GN=FOCAD PE=1 SV=1;tr|S4R400|S4R400_HUMAN Focadhesin OS=Homo sapiens OX=9606 GN=FOCAD PE=1 SV=2;tr|B3KNV9|B3KNV9_HUMAN cDNA FLJ30554 fis, clone BRAWH2003693 OS=Homo sapiens OX=9606 PE=2 SV=1	-3.6911	2.29638
614	A0A024RE06;P49917;A8K8Q4;A0A0C4DGV9;B2RBW4	DNA ligase;DNA ligase 4	LIG4	tr|A0A024RE06|A0A024RE06_HUMAN DNA ligase OS=Homo sapiens OX=9606 GN=LIG4 PE=3 SV=1;sp|P49917|DNLI4_HUMAN DNA ligase 4 OS=Homo sapiens OX=9606 GN=LIG4 PE=1 SV=2;tr|A8K8Q4|A8K8Q4_HUMAN DNA ligase OS=Homo sapiens OX=9606 PE=2 SV=1;tr|A0A0C4DGV9|A0A0C4DGV9_HU	18.8471	0.902599
1729	B7ZLW0;Q93052;B7Z871;A0A087WZF1;C9JUT4;B7Z8W0;A2NHJ0;C9JXK9;C9JE51;C9J2R5;C9JIY7;C9JT42;C9J3U9;C9J1K7;C9J5C8;C9J4E3	Lipoma-preferred partner	LPP	tr|B7ZLW0|B7ZLW0_HUMAN LPP protein OS=Homo sapiens OX=9606 GN=LPP PE=2 SV=1;sp|Q93052|LPP_HUMAN Lipoma-preferred partner OS=Homo sapiens OX=9606 GN=LPP PE=1 SV=1;tr|B7Z871|B7Z871_HUMAN cDNA FLJ50930, highly similar to Lipoma-preferred partner OS=Homo sapie	-4.39113	2.28121
1527	B4DG55;L7RRS0;O00443;B4DRX6	Phosphatidylinositol 4-phosphate 3-kinase C2 domain-containing subunit alpha	PIK3C2A	tr|B4DG55|B4DG55_HUMAN cDNA FLJ53905, highly similar to Phosphatidylinositol-4-phosphate 3-kinase C2domain-containing alpha polypeptide OS=Homo sapiens OX=9606 PE=2 SV=1;tr|L7RRS0|L7RRS0_HUMAN Phosphatidylinositol-4-phosphate 3-kinase, catalytic subunit ty	17.075	0.60206
1010	E7EVM7;A0A2H4UKA7;Q9H5I5-2;Q9H5I5;Q9H5I5-4;J3KRQ5;Q9H5I5-3;V9GZ18;J3QLJ9	Piezo-type mechanosensitive ion channel component;Piezo-type mechanosensitive ion channel component 2	PIEZO2	tr|E7EVM7|E7EVM7_HUMAN Piezo-type mechanosensitive ion channel component OS=Homo sapiens OX=9606 GN=PIEZO2 PE=1 SV=2;tr|A0A2H4UKA7|A0A2H4UKA7_HUMAN Piezo-type mechanosensitive ion channel component OS=Homo sapiens OX=9606 GN=PIEZO2 PE=2 SV=1;sp|Q9H5I5-2|PI	2.22441	0.927598
2140	Q59H05;O15438;O15438-4;Q96QA9;D3DTY0;O15438-2;H0Y8Q6;Q2M3C9;Q86VN9;O15438-5	Canalicular multispecific organic anion transporter 2	ABCC3;MRP3	tr|Q59H05|Q59H05_HUMAN ATP-binding cassette, sub-family C, member 3 isoform MRP3 variant (Fragment) OS=Homo sapiens OX=9606 PE=2 SV=1;sp|O15438|MRP3_HUMAN Canalicular multispecific organic anion transporter 2 OS=Homo sapiens OX=9606 GN=ABCC3 PE=1 SV=3;sp|O	-0.810442	1.739
682	A0A087X0K9;G5E9E7;Q07157-2;Q6MZU1;A9CQZ8;G3V1L9;Q07157;Q68DX9;H0YKB1;H0YLT6	Tight junction protein ZO-1	TJP1;DKFZp686A1195;DKFZp686M05161	tr|A0A087X0K9|A0A087X0K9_HUMAN Tight junction protein ZO-1 OS=Homo sapiens OX=9606 GN=TJP1 PE=1 SV=1;tr|G5E9E7|G5E9E7_HUMAN Tight junction protein 1 (Zona occludens 1), isoform CRA_e OS=Homo sapiens OX=9606 GN=TJP1 PE=1 SV=1;sp|Q07157-2|ZO1_HUMAN Isoform S	2.62746	0.634924
987	A0A1W2PNV4;Q75MY0;E9PF58;V9HVZ6;Q92747;F8WFD3;Q53GB6;A0A0K0K1L3;Q59GQ0;Q92747-2			tr|A0A1W2PNV4|A0A1W2PNV4_HUMAN Uncharacterized protein OS=Homo sapiens OX=9606 PE=4 SV=1	17.1419	0.60206
2711	Q14690;B4DH82;B4DES7	Protein RRP5 homolog	PDCD11	sp|Q14690|RRP5_HUMAN Protein RRP5 homolog OS=Homo sapiens OX=9606 GN=PDCD11 PE=1 SV=3;tr|B4DH82|B4DH82_HUMAN cDNA FLJ54437, highly similar to RRP5 protein homolog (Fragment) OS=Homo sapiens OX=9606 PE=2 SV=1;tr|B4DES7|B4DES7_HUMAN cDNA FLJ61218, highly sim	-0.615287	0.392367
1374	B2R8Y6;Q6MZM4;Q6MZM3;Q8N3U4;Q8N3U4-2;Q6AI02;Q6MZP3;B4DQ46;B1AMT4;B1AMT1;B1AMT2;B1AMT3;Q68DW7;B4DYS8;B2RU25;A8K8M9;D6W5U7;Q4LE48;Q9UJ98-2;Q9UJ98-3;Q8WVM7-2;Q9UJ98;Q8WVM7	Cohesin subunit SA-2	DKFZp686P16143;DKFZp686C21148;STAG2;DKFZp686P168;DKFZp686I05169	tr|B2R8Y6|B2R8Y6_HUMAN cDNA, FLJ94121, highly similar to Homo sapiens stromal antigen 2 (STAG2), mRNA OS=Homo sapiens OX=9606 PE=2 SV=1;tr|Q6MZM4|Q6MZM4_HUMAN Uncharacterized protein DKFZp686P16143 OS=Homo sapiens OX=9606 GN=DKFZp686P16143 PE=2 SV=1;tr|Q6M	0.346135	1.1187
1034	A0A2P9ASU2			tr|A0A2P9ASU2|A0A2P9ASU2_HUMAN DNA-directed RNA polymerase subunit OS=Homo sapiens OX=9606 GN=rpoC PE=3 SV=1	17.2199	0.60206
1669	B4E2S4;Q9HC62-2;Q9HC62;B4DKY9;B4DKW6;C9IYB7;H7C1A0	Sentrin-specific protease 2	SENP2	tr|B4E2S4|B4E2S4_HUMAN cDNA FLJ54905, highly similar to Sentrin-specific protease 2 OS=Homo sapiens OX=9606 PE=2 SV=1;sp|Q9HC62-2|SENP2_HUMAN Isoform 2 of Sentrin-specific protease 2 OS=Homo sapiens OX=9606 GN=SENP2;sp|Q9HC62|SENP2_HUMAN Sentrin-specific p	-2.08357	0.438552
100	A0A024R0Q4;Q8IV08;B4DEL6;M0R3G9	Phospholipase D3	PLD3	tr|A0A024R0Q4|A0A024R0Q4_HUMAN Phospholipase D family, member 3, isoform CRA_b OS=Homo sapiens OX=9606 GN=PLD3 PE=4 SV=1;sp|Q8IV08|PLD3_HUMAN Phospholipase D3 OS=Homo sapiens OX=9606 GN=PLD3 PE=1 SV=1;tr|B4DEL6|B4DEL6_HUMAN cDNA FLJ59669, highly similar to	0.00862597	0.33887
1453	B3KNJ2;O94806;A0A1S5UZ27;O94806-2;M0R2Z8;A0JLT6;B4E125;Q8N2H2;Q1KKQ2;F8WBA3;Q9BZL6-2;Q9BZL6;Q9BZL6-3;Q15139	Protein kinase C;Serine/threonine-protein kinase D3	PRKD3	tr|B3KNJ2|B3KNJ2_HUMAN cDNA FLJ14679 fis, clone NT2RP2004232, highly similar to Serine/threonine-protein kinase D3 OS=Homo sapiens OX=9606 PE=2 SV=1;sp|O94806|KPCD3_HUMAN Serine/threonine-protein kinase D3 OS=Homo sapiens OX=9606 GN=PRKD3 PE=1 SV=1;tr|A0A1	-2.89494	0.535032
975	Q6PI51;A0A1S5UZH6;Q13214-2;Q13214;A0A0C4DGV8;B4DEK9;Q9HBR1;Q59FY7	Semaphorin-3B	SEMA3B	tr|Q6PI51|Q6PI51_HUMAN SEMA3B protein (Fragment) OS=Homo sapiens OX=9606 GN=SEMA3B PE=2 SV=1;tr|A0A1S5UZH6|A0A1S5UZH6_HUMAN Semaphorin-3B OS=Homo sapiens OX=9606 GN=SEMA3B PE=2 SV=1;sp|Q13214-2|SEM3B_HUMAN Isoform 2 of Semaphorin-3B OS=Homo sapiens OX=9606	-3.4507	0.947598
3006	Q8IX18-4;Q8IX18-3;Q8IX18;J3KSW6;B4DR88;Q8IX18-2;J3KTK0;J3KS08;J3KSX9;F5H625;B3KRC7	Probable ATP-dependent RNA helicase DHX40	DHX40	sp|Q8IX18-4|DHX40_HUMAN Isoform 4 of Probable ATP-dependent RNA helicase DHX40 OS=Homo sapiens OX=9606 GN=DHX40;sp|Q8IX18-3|DHX40_HUMAN Isoform 3 of Probable ATP-dependent RNA helicase DHX40 OS=Homo sapiens OX=9606 GN=DHX40;sp|Q8IX18|DHX40_HUMAN Probable A	17.261	0.385975
2840	Q5JWT2;Q9ULK4-4;Q9ULK4-5;Q9ULK4-3;Q9ULK4;B4E3G4;Q9ULK4-2;Q9ULK4-6;B9TX51;B9TX49	Mediator of RNA polymerase II transcription subunit 23	MED23	tr|Q5JWT2|Q5JWT2_HUMAN Mediator of RNA polymerase II transcription subunit 23 OS=Homo sapiens OX=9606 GN=MED23 PE=1 SV=1;sp|Q9ULK4-4|MED23_HUMAN Isoform 4 of Mediator of RNA polymerase II transcription subunit 23 OS=Homo sapiens OX=9606 GN=MED23;sp|Q9ULK4-	0.139759	0.525068
2919	Q6P9B9	Integrator complex subunit 5	INTS5	sp|Q6P9B9|INT5_HUMAN Integrator complex subunit 5 OS=Homo sapiens OX=9606 GN=INTS5 PE=1 SV=1	-0.688613	0.505902
2340	P17655;B2RCM3;Q59EF6;P17655-2;B4E1R7;B4DN77;B3KUH9;Q6ZVC6	Calpain-2 catalytic subunit	CAPN2	sp|P17655|CAN2_HUMAN Calpain-2 catalytic subunit OS=Homo sapiens OX=9606 GN=CAPN2 PE=1 SV=6;tr|B2RCM3|B2RCM3_HUMAN cDNA, FLJ96158, highly similar to Homo sapiens calpain 2, (m/II) large subunit (CAPN2), mRNA OS=Homo sapiens OX=9606 PE=2 SV=1;tr|Q59EF6|Q59E	-3.48377	0.796335
3047	Q8NCK5;Q9BQ67;Q8TCJ8;B2RDP6;M0QX71;B4DTI1	Glutamate-rich WD repeat-containing protein 1	GRWD1;DKFZp564C172	tr|Q8NCK5|Q8NCK5_HUMAN cDNA FLJ90195 fis, clone MAMMA1001310 OS=Homo sapiens OX=9606 PE=2 SV=1;sp|Q9BQ67|GRWD1_HUMAN Glutamate-rich WD repeat-containing protein 1 OS=Homo sapiens OX=9606 GN=GRWD1 PE=1 SV=1;tr|Q8TCJ8|Q8TCJ8_HUMAN Uncharacterized protein DKF	-3.15406	0.907292
433	A8K4A8;A0A024R8Z9;Q6PI48;Q9NVT8;Q9H9J7;Q9H9M6	Aspartate--tRNA ligase, mitochondrial	DARS2	tr|A8K4A8|A8K4A8_HUMAN cDNA FLJ76156, highly similar to Homo sapiens aspartyl-tRNA synthetase 2 (DARS2), mRNA OS=Homo sapiens OX=9606 PE=2 SV=1;tr|A0A024R8Z9|A0A024R8Z9_HUMAN Aspartyl-tRNA synthetase 2 (Mitochondrial), isoform CRA_b OS=Homo sapiens OX=9606	17.3873	0.60206
274	A0A024R534;O94776;O94776-2;Q86TR6;Q53RX8;E9PCS8;E7EQY4;D6W5A2;E7EV10;Q13330-2;Q9BTC8-2;Q9BTC8	Metastasis-associated protein MTA2	MTA2	tr|A0A024R534|A0A024R534_HUMAN Metastasis associated 1 family, member 2, isoform CRA_a OS=Homo sapiens OX=9606 GN=MTA2 PE=4 SV=1;sp|O94776|MTA2_HUMAN Metastasis-associated protein MTA2 OS=Homo sapiens OX=9606 GN=MTA2 PE=1 SV=1;sp|O94776-2|MTA2_HUMAN Isofor	-0.607681	1.33781
3211	Q9BYN8	28S ribosomal protein S26, mitochondrial	MRPS26	sp|Q9BYN8|RT26_HUMAN 28S ribosomal protein S26, mitochondrial OS=Homo sapiens OX=9606 GN=MRPS26 PE=1 SV=1	17.4017	0.60206
94	A8K3W4;A0A024R0J9;A0A0A0MRA5;B7Z4B8;A8K6U7;Q9BUJ2-4;Q9BUJ2-2;Q9BUJ2;Q9BUJ2-3;M0R3F1;A8K5K0;M0QYZ0;B3KM60;M0R203;M0QZV6;M0R0K8;M0QYM5;M0QYI8;Q9BUJ2-5	Heterogeneous nuclear ribonucleoprotein U-like protein 1	HNRPUL1;HNRNPUL1	tr|A8K3W4|A8K3W4_HUMAN cDNA FLJ75163, highly similar to Homo sapiens heterogeneous nuclear ribonucleoprotein U-like 1 (HNRPUL1), transcript variant 4, mRNA OS=Homo sapiens OX=9606 PE=2 SV=1;tr|A0A024R0J9|A0A024R0J9_HUMAN Heterogeneous nuclear ribonucleopro	-4.85565	1.9963
955	L7RSM7;A0A169TED2;P17252;Q59FI5;Q2TSD3;J3KRN5;Q7Z727	Protein kinase C;Protein kinase C alpha type	PRKCA	tr|L7RSM7|L7RSM7_HUMAN Protein kinase C OS=Homo sapiens OX=9606 GN=PRKCA PE=3 SV=1;tr|A0A169TED2|A0A169TED2_HUMAN Protein kinase C OS=Homo sapiens OX=9606 GN=PRKCA PE=2 SV=1;sp|P17252|KPCA_HUMAN Protein kinase C alpha type OS=Homo sapiens OX=9606 GN=PRKCA	-0.479396	0.481876
1624	B4DV28;Q96KP4;A0A024R382;J3QQN6;J3QR27;J3QLU1;J3QKQ0;J3QRD0;J3QL02;J3KSV5;A0A087WYZ1;J3QKT2;Q96KP4-2;J3KRD5;A0A087WVS2;Q9NW02;B4DPF1;J3KSS4;J3QRP4;J3QRA8;Q9NUV1;Q9H7K8	Cytosolic non-specific dipeptidase	CNDP2	tr|B4DV28|B4DV28_HUMAN cDNA FLJ54170, highly similar to Cytosolic nonspecific dipeptidase OS=Homo sapiens OX=9606 PE=2 SV=1;sp|Q96KP4|CNDP2_HUMAN Cytosolic non-specific dipeptidase OS=Homo sapiens OX=9606 GN=CNDP2 PE=1 SV=2;tr|A0A024R382|A0A024R382_HUMAN C	0.409821	0.90337
1053	B7ZKY2;A0A2R8Y6F8;A0A2U3TZM1;A0A2R8YE77;O14936-3;O14936;A0A2R8Y3B3;A0A2U3TZN6;A0A2U3TZM4;A0A2R8YFN5;A0A2R8YEK3;O14936-4;O14936-6;O14936-2;Q5JS74;Q5JS72;O14936-5;A0A2R8YEJ7;A0A2R8Y6D8;Q5JS79;A0A0B6XJY0	Peripheral plasma membrane protein CASK	CASK	tr|B7ZKY2|B7ZKY2_HUMAN Calcium/calmodulin-dependent serine protein kinase (MAGUK family) OS=Homo sapiens OX=9606 GN=CASK PE=2 SV=1;tr|A0A2R8Y6F8|A0A2R8Y6F8_HUMAN Peripheral plasma membrane protein CASK OS=Homo sapiens OX=9606 GN=CASK PE=1 SV=1;tr|A0A2U3TZM	18.4253	0.541369
2041	J3KNZ9;B3KTZ7;A0A024QZC5;Q9HAH7;Q9HAH7-1	Probable fibrosin-1	FBRS;FBS1	tr|J3KNZ9|J3KNZ9_HUMAN Probable fibrosin-1 OS=Homo sapiens OX=9606 GN=FBRS PE=1 SV=1;tr|B3KTZ7|B3KTZ7_HUMAN cDNA FLJ39003 fis, clone NT2RI2024313, highly similar to Probable fibrosin-1 long transcript protein OS=Homo sapiens OX=9606 PE=2 SV=1;tr|A0A024QZC5	-4.79249	1.19288
2915	Q6P2E9-2;Q6P2E9;I3L2F4;I3L0V0;I3L3M2	Enhancer of mRNA-decapping protein 4	EDC4	sp|Q6P2E9-2|EDC4_HUMAN Isoform 2 of Enhancer of mRNA-decapping protein 4 OS=Homo sapiens OX=9606 GN=EDC4;sp|Q6P2E9|EDC4_HUMAN Enhancer of mRNA-decapping protein 4 OS=Homo sapiens OX=9606 GN=EDC4 PE=1 SV=1;tr|I3L2F4|I3L2F4_HUMAN Enhancer of mRNA-decapping p	17.4314	0.60206
1688	B7WP74;Q9HCG8	Pre-mRNA-splicing factor CWC22 homolog	CWC22	tr|B7WP74|B7WP74_HUMAN Pre-mRNA-splicing factor CWC22 homolog (Fragment) OS=Homo sapiens OX=9606 GN=CWC22 PE=1 SV=1;sp|Q9HCG8|CWC22_HUMAN Pre-mRNA-splicing factor CWC22 homolog OS=Homo sapiens OX=9606 GN=CWC22 PE=1 SV=3	17.4496	0.60206
2893	Q6FIF5;Q9Y6I8;B4DWH1;Q9Y6I8-2;B4DLI8	Peroxisomal membrane protein 4	PXMP4	tr|Q6FIF5|Q6FIF5_HUMAN Peroxisomal membrane protein 4 OS=Homo sapiens OX=9606 GN=PXMP4 PE=2 SV=1;sp|Q9Y6I8|PXMP4_HUMAN Peroxisomal membrane protein 4 OS=Homo sapiens OX=9606 GN=PXMP4 PE=1 SV=3;tr|B4DWH1|B4DWH1_HUMAN cDNA FLJ53748, moderately similar to Per	17.4549	0.60206
3081	Q8WU76-2;Q8WU76;A0A087WUD7	Sec1 family domain-containing protein 2	SCFD2	sp|Q8WU76-2|SCFD2_HUMAN Isoform 2 of Sec1 family domain-containing protein 2 OS=Homo sapiens OX=9606 GN=SCFD2;sp|Q8WU76|SCFD2_HUMAN Sec1 family domain-containing protein 2 OS=Homo sapiens OX=9606 GN=SCFD2 PE=1 SV=2	18.5038	0.973253
983	A0A1U9X9A9;A0A1U9X993;A0A1U9X985;A0A1U9X982;A0A1U9X972;A0A1U9X998;A0A1U9X996;A0A1U9X988;A0A1U9X975;A0A1U9X9A5;A0A1U9X987;A0A1U9X999;A0A1U9X977;A0A1U9X974;P48634;P48634-3;P48634-2;P48634-4;B4DLY2;B4DZ56;B4DQ12	Protein PRRC2A	PRRC2A	tr|A0A1U9X9A9|A0A1U9X9A9_HUMAN PRRC2A OS=Homo sapiens OX=9606 PE=4 SV=1;tr|A0A1U9X993|A0A1U9X993_HUMAN PRRC2A OS=Homo sapiens OX=9606 PE=4 SV=1;tr|A0A1U9X985|A0A1U9X985_HUMAN PRRC2A OS=Homo sapiens OX=9606 PE=4 SV=1;tr|A0A1U9X982|A0A1U9X982_HUMAN PRRC2A OS	-7.77908	1.11413
2927	Q6R327;Q6R327-3;D6R9S6;Q8N6M7;Q6R327-4	Rapamycin-insensitive companion of mTOR	RICTOR	sp|Q6R327|RICTR_HUMAN Rapamycin-insensitive companion of mTOR OS=Homo sapiens OX=9606 GN=RICTOR PE=1 SV=1;sp|Q6R327-3|RICTR_HUMAN Isoform 3 of Rapamycin-insensitive companion of mTOR OS=Homo sapiens OX=9606 GN=RICTOR	0.610188	0.578247
3174	Q99988;A0A0A0MTT8	Growth/differentiation factor 15	GDF15	sp|Q99988|GDF15_HUMAN Growth/differentiation factor 15 OS=Homo sapiens OX=9606 GN=GDF15 PE=1 SV=3	17.4776	0.60206
1539	C9J2Y9;B4DHJ3;P30876;C9J4M6;B4DR40;B4DH29;A0A1W2PPT5;B2WTN6	DNA-directed RNA polymerase;DNA-directed RNA polymerase II subunit RPB2	POLR2B	tr|C9J2Y9|C9J2Y9_HUMAN DNA-directed RNA polymerase subunit beta OS=Homo sapiens OX=9606 GN=POLR2B PE=1 SV=2;tr|B4DHJ3|B4DHJ3_HUMAN DNA-directed RNA polymerase subunit beta OS=Homo sapiens OX=9606 PE=2 SV=1;sp|P30876|RPB2_HUMAN DNA-directed RNA polymerase I	-2.06672	0.61938
2088	M0QXA7;O95785-3;B3KR89;B9EGQ5;A0A2R8YFV2;O95785-2;O95785-4;O95785	Protein Wiz	WIZ	tr|M0QXA7|M0QXA7_HUMAN Protein Wiz OS=Homo sapiens OX=9606 GN=WIZ PE=1 SV=1;sp|O95785-3|WIZ_HUMAN Isoform 3 of Protein Wiz OS=Homo sapiens OX=9606 GN=WIZ;tr|B3KR89|B3KR89_HUMAN cDNA FLJ33864 fis, clone CTONG2006412, highly similar to Mus musculus widely-in	-2.32549	0.90423
2415	P35251-2;P35251;H0Y8U4;Q14756	Replication factor C subunit 1	RFC1	sp|P35251-2|RFC1_HUMAN Isoform 2 of Replication factor C subunit 1 OS=Homo sapiens OX=9606 GN=RFC1;sp|P35251|RFC1_HUMAN Replication factor C subunit 1 OS=Homo sapiens OX=9606 GN=RFC1 PE=1 SV=4	-0.878873	1.02179
3082	Q8WUA4;Q53QN0;A0A087WZD8;Q8WUA4-2;Q53SY8;H0Y4Q6;H7C318;H7C3X9	General transcription factor 3C polypeptide 2	GTF3C2	sp|Q8WUA4|TF3C2_HUMAN General transcription factor 3C polypeptide 2 OS=Homo sapiens OX=9606 GN=GTF3C2 PE=1 SV=2;tr|Q53QN0|Q53QN0_HUMAN Uncharacterized protein GTF3C2 (Fragment) OS=Homo sapiens OX=9606 GN=GTF3C2 PE=4 SV=1;tr|A0A087WZD8|A0A087WZD8_HUMAN Gene	17.5012	0.60206
2384	P26232-2;P26232-5;P26232;P26232-3;C9J144;C9IZ88	Catenin alpha-2	CTNNA2	sp|P26232-2|CTNA2_HUMAN Isoform 2 of Catenin alpha-2 OS=Homo sapiens OX=9606 GN=CTNNA2;sp|P26232-5|CTNA2_HUMAN Isoform 5 of Catenin alpha-2 OS=Homo sapiens OX=9606 GN=CTNNA2;sp|P26232|CTNA2_HUMAN Catenin alpha-2 OS=Homo sapiens OX=9606 GN=CTNNA2 PE=1 SV=5;	17.5194	0.60206
1662	B4E206;Q8WUM0;A0A024R3R6;B4E3T7	Nuclear pore complex protein Nup133	NUP133	tr|B4E206|B4E206_HUMAN cDNA FLJ55441, highly similar to Nuclear pore complex protein Nup133 OS=Homo sapiens OX=9606 PE=2 SV=1;sp|Q8WUM0|NU133_HUMAN Nuclear pore complex protein Nup133 OS=Homo sapiens OX=9606 GN=NUP133 PE=1 SV=2;tr|A0A024R3R6|A0A024R3R6_HUM	-2.71684	1.07979
381	A0A024R843;Q13049;Q5JVY0	E3 ubiquitin-protein ligase TRIM32	TRIM32	tr|A0A024R843|A0A024R843_HUMAN Tripartite motif-containing 32, isoform CRA_a OS=Homo sapiens OX=9606 GN=TRIM32 PE=4 SV=1;sp|Q13049|TRI32_HUMAN E3 ubiquitin-protein ligase TRIM32 OS=Homo sapiens OX=9606 GN=TRIM32 PE=1 SV=2	-2.82666	0.862727
567	A0A024RCM3;Q13838;Q13838-2;Q5STU3;F6WLT2;A0A0G2JJZ9;F6S4E6;A0A0A0MT12;F6TRA5;Q59G92;A0A140T9X3;B4DP52;A0A140T9X9;F6QYI9;A0A0G2JJL7;A0A140T996;F6R6M7;F6UJC5;A0A140TA18;A0A140T9L4;A0A140T973;A0A140T9K1;H0Y400;B4DIJ6;B4DIZ8;A0A140T9K2;A0A140T9N3;H0YCC6	Spliceosome RNA helicase DDX39B	hCG_2005638;DDX39B	tr|A0A024RCM3|A0A024RCM3_HUMAN DDX39B OS=Homo sapiens OX=9606 GN=hCG_2005638 PE=4 SV=1;sp|Q13838|DX39B_HUMAN Spliceosome RNA helicase DDX39B OS=Homo sapiens OX=9606 GN=DDX39B PE=1 SV=1;sp|Q13838-2|DX39B_HUMAN Isoform 2 of Spliceosome RNA helicase DDX39B OS	18.5464	2.45488
1156	J3KNE0;A6NKT7;Q7Z3J3;F8VYC4;B4DYH0;A0A286YES2;A0A1W2PNU4;P0DJD0;P0DJD1;V9HWE4;Q99666;O14715;F8W705;B4DZH4;J3KQ37;Q99666-2;B4DTT2;H0YBN8;Q7Z3J3-2;C9J1W9;C9JF75;C9J6W1;B4DTM4;B4E0M7	RanBP2-like and GRIP domain-containing protein 3;RanBP2-like and GRIP domain-containing protein 4;RANBP2-like and GRIP domain-containing protein 1;RANBP2-like and GRIP domain-containing protein 2;RANBP2-like and GRIP domain-containing protein 5/6;RANBP2-like and GRIP domain-containing protein 8	RGPD3;RGPD4;RGPD1;RGPD2;HEL161;RGPD5;RGPD8	tr|J3KNE0|J3KNE0_HUMAN RanBP2-like and GRIP domain-containing protein 3 OS=Homo sapiens OX=9606 GN=RGPD3 PE=4 SV=2;sp|A6NKT7|RGPD3_HUMAN RanBP2-like and GRIP domain-containing protein 3 OS=Homo sapiens OX=9606 GN=RGPD3 PE=3 SV=2;sp|Q7Z3J3|RGPD4_HUMAN RanBP	18.4113	1.43659
502	F5GZP6;A0A024RB02;Q86W92-3;Q86W92-4;Q86W92-2;Q86W92;B4DFU8;B3KM46;H0YFE4;B7Z2C0;Q68DV6;E9PP16;B7Z7G3;Q8ND30-3;Q8ND30-2;Q8ND30	Liprin-beta-1	PPFIBP1	tr|F5GZP6|F5GZP6_HUMAN Liprin-beta-1 (Fragment) OS=Homo sapiens OX=9606 GN=PPFIBP1 PE=1 SV=1;tr|A0A024RB02|A0A024RB02_HUMAN PTPRF interacting protein, binding protein 1 (Liprin beta 1), isoform CRA_a OS=Homo sapiens OX=9606 GN=PPFIBP1 PE=4 SV=1;sp|Q86W92-3	17.6015	0.60206
1241	V9HW72;A8K690;P31948-3;P31948;P31948-2;F5GXD8;F5H783	Stress-induced-phosphoprotein 1	HEL-S-94n;STIP1	tr|V9HW72|V9HW72_HUMAN Epididymis secretory sperm binding protein Li 94n OS=Homo sapiens OX=9606 GN=HEL-S-94n PE=2 SV=1;tr|A8K690|A8K690_HUMAN cDNA FLJ76863, highly similar to Homo sapiens stress-induced-phosphoprotein 1 (Hsp70/Hsp90-organizing protein) (S	0.771495	1.0809
2847	Q5QP82-2;Q5QP82;A0A0A0MQT4	DDB1- and CUL4-associated factor 10	DCAF10	sp|Q5QP82-2|DCA10_HUMAN Isoform 2 of DDB1- and CUL4-associated factor 10 OS=Homo sapiens OX=9606 GN=DCAF10;sp|Q5QP82|DCA10_HUMAN DDB1- and CUL4-associated factor 10 OS=Homo sapiens OX=9606 GN=DCAF10 PE=1 SV=1;tr|A0A0A0MQT4|A0A0A0MQT4_HUMAN DDB1- and CUL4-a	-2.90011	0.60206
3376	Q9UPT8;M0QY97	Zinc finger CCCH domain-containing protein 4	ZC3H4	sp|Q9UPT8|ZC3H4_HUMAN Zinc finger CCCH domain-containing protein 4 OS=Homo sapiens OX=9606 GN=ZC3H4 PE=1 SV=3;tr|M0QY97|M0QY97_HUMAN Zinc finger CCCH domain-containing protein 4 (Fragment) OS=Homo sapiens OX=9606 GN=ZC3H4 PE=1 SV=1	-5.40553	2.2895
2668	Q13310-2;Q13310-3;B1ANR0;Q6IQ30;Q13310;H0Y5F5;Q59GZ7;Q53GL4;Q15164;H0YEU6;Q147Y3;Q3B867;B1ANR1;H0YCC8;H0YEQ8;H0Y6X6;H0YER0	Polyadenylate-binding protein 4;Polyadenylate-binding protein	PABPC4	sp|Q13310-2|PABP4_HUMAN Isoform 2 of Polyadenylate-binding protein 4 OS=Homo sapiens OX=9606 GN=PABPC4;sp|Q13310-3|PABP4_HUMAN Isoform 3 of Polyadenylate-binding protein 4 OS=Homo sapiens OX=9606 GN=PABPC4;tr|B1ANR0|B1ANR0_HUMAN Polyadenylate-binding prote	-4.40057	0.907796
299	A0A024R5M9;Q4LE64;Q14980-2;Q14980;A0A087WY61;Q14980-4;Q14980-3;Q59HB8;A0A024R5G4;Q7Z757;Q96HN5;H0YFY6;Q14980-5;F5H4J1;A8K394;Q3SYK8;F5H6Y5;K4DIE0;F5H763;Q86XH4;Q9UNL7;F5H0Z7;G1UI36;F5H2F3;F5H3L6;F5GWK2;F5H073;F5H068;F8W6T3;F5H1L0;F5GZW1;Q9UPG3;F5H7R5;F5H4Y4;F5GWA2	Nuclear mitotic apparatus protein 1	NUMA1;NUMA1 variant protein	tr|A0A024R5M9|A0A024R5M9_HUMAN Nuclear mitotic apparatus protein 1, isoform CRA_a OS=Homo sapiens OX=9606 GN=NUMA1 PE=4 SV=1;tr|Q4LE64|Q4LE64_HUMAN NUMA1 variant protein (Fragment) OS=Homo sapiens OX=9606 GN=NUMA1 variant protein PE=2 SV=1;sp|Q14980-2|NUMA	-3.49725	1.51853
2730	Q15172;Q15172-2	Serine/threonine-protein phosphatase 2A 56 kDa regulatory subunit alpha isoform	PPP2R5A	sp|Q15172|2A5A_HUMAN Serine/threonine-protein phosphatase 2A 56 kDa regulatory subunit alpha isoform OS=Homo sapiens OX=9606 GN=PPP2R5A PE=1 SV=1;sp|Q15172-2|2A5A_HUMAN Isoform 2 of Serine/threonine-protein phosphatase 2A 56 kDa regulatory subunit alpha is	17.7027	0.60206
1428	E7EX73;E9PGM1;E7EUU4;B4DGF1;B2RU10;B2RU06;Q4LE58;Q04637-6;Q04637-7;Q04637-5;Q04637-4;Q04637-3;Q04637;Q04637-8;Q04637-9;B4DSI9;C9J6B6;C9JF13;C9J2Z7;C9K073;H7C044;Q96I65;B4DZE1;B4DH17;A0A0A0MSA7;A0A0U1RQK7;Q59GJ0;O43432-4;O43432;O43432-3	Eukaryotic translation initiation factor 4 gamma 1	EIF4G1;EIF4G1 variant protein	tr|E7EX73|E7EX73_HUMAN Eukaryotic translation initiation factor 4 gamma 1 OS=Homo sapiens OX=9606 GN=EIF4G1 PE=1 SV=1;tr|E9PGM1|E9PGM1_HUMAN Eukaryotic translation initiation factor 4 gamma 1 OS=Homo sapiens OX=9606 GN=EIF4G1 PE=1 SV=1;tr|E7EUU4|E7EUU4_HUM	-2.50627	1.20323
2034	J3KN16;Q5VYK3;B3KXF2;B3KV72;R4GMY1;F6XAQ5	Proteasome-associated protein ECM29 homolog	KIAA0368;ECM29	tr|J3KN16|J3KN16_HUMAN Proteasome adapter and scaffold protein ECM29 OS=Homo sapiens OX=9606 GN=ECPAS PE=1 SV=1;sp|Q5VYK3|ECM29_HUMAN Proteasome adapter and scaffold protein ECM29 OS=Homo sapiens OX=9606 GN=ECPAS PE=1 SV=2;tr|B3KXF2|B3KXF2_HUMAN cDNA FLJ45	-0.770185	5.14964
2922	Q6PGP7;D6RCE2;D6RDA0	Tetratricopeptide repeat protein 37	TTC37	sp|Q6PGP7|TTC37_HUMAN Tetratricopeptide repeat protein 37 OS=Homo sapiens OX=9606 GN=TTC37 PE=1 SV=1	-1.34979	2.57757
2357	Q9HBB2;V9HWB7;P21399;Q59FI0	Aconitate hydratase;Cytoplasmic aconitate hydratase	IRP1;HEL60;ACO1	tr|Q9HBB2|Q9HBB2_HUMAN Iron regulatory protein 1 OS=Homo sapiens OX=9606 GN=IRP1 PE=2 SV=1;tr|V9HWB7|V9HWB7_HUMAN Epididymis luminal protein 60 OS=Homo sapiens OX=9606 GN=HEL60 PE=2 SV=1;sp|P21399|ACOC_HUMAN Cytoplasmic aconitate hydratase OS=Homo sapiens	17.7311	0.60206
1532	B4DH39;Q8TAF6;O60488-2;O60488;D6RF95;H0Y9A0;D6RFW9;D6RDA8;D6RD96	Long-chain-fatty-acid--CoA ligase 4	FACL4;ACSL4	tr|B4DH39|B4DH39_HUMAN cDNA FLJ57028, highly similar to Long-chain-fatty-acid--CoA ligase 4 OS=Homo sapiens OX=9606 PE=2 SV=1;tr|Q8TAF6|Q8TAF6_HUMAN Acyl-CoA synthetase 4 OS=Homo sapiens OX=9606 GN=FACL4 PE=2 SV=1;sp|O60488-2|ACSL4_HUMAN Isoform Short of L	-0.598151	0.351568
2307	P10114	Ras-related protein Rap-2a	RAP2A	sp|P10114|RAP2A_HUMAN Ras-related protein Rap-2a OS=Homo sapiens OX=9606 GN=RAP2A PE=1 SV=1	17.7413	0.60206
1745	C9IZY8;Q6ZN96;Q96PY5;Q96PY5-3;B3KT32;Q8N4Y7;Q9NSL0;B3KXD8;F8W1F5;Q8IVF7-2;Q8IVF7-3;Q8IVF7	Formin-like protein 2;Formin-like protein 3	FMNL2;FMNL3;DKFZp762B245	tr|C9IZY8|C9IZY8_HUMAN Formin-like protein 2 OS=Homo sapiens OX=9606 GN=FMNL2 PE=1 SV=1;tr|Q6ZN96|Q6ZN96_HUMAN cDNA FLJ16308 fis, clone PUAEN2006335 OS=Homo sapiens OX=9606 PE=1 SV=1;sp|Q96PY5|FMNL2_HUMAN Formin-like protein 2 OS=Homo sapiens OX=9606 GN=FM	17.7418	0.60206
1311	B0AZQ4;Q9UQE7;Q86VX4	Structural maintenance of chromosomes protein;Structural maintenance of chromosomes protein 3	SMC3	tr|B0AZQ4|B0AZQ4_HUMAN Structural maintenance of chromosomes protein OS=Homo sapiens OX=9606 PE=2 SV=1;sp|Q9UQE7|SMC3_HUMAN Structural maintenance of chromosomes protein 3 OS=Homo sapiens OX=9606 GN=SMC3 PE=1 SV=2;tr|Q86VX4|Q86VX4_HUMAN Structural maintena	-0.542883	0.584978
3281	Q9NTJ5;E9PGZ4;B4DVV3;Q9NTJ5-2;F8WDN7;B3KX17;C9J3E3;C9JV50	Phosphatidylinositide phosphatase SAC1	SACM1L	sp|Q9NTJ5|SAC1_HUMAN Phosphatidylinositide phosphatase SAC1 OS=Homo sapiens OX=9606 GN=SACM1L PE=1 SV=2;tr|E9PGZ4|E9PGZ4_HUMAN Phosphatidylinositide phosphatase SAC1 OS=Homo sapiens OX=9606 GN=SACM1L PE=1 SV=1;tr|B4DVV3|B4DVV3_HUMAN cDNA FLJ53218, highly s	-0.405208	0.40304
2414	P35249;C9JZI1;P35249-2;C9J8M3;C9JTT7;H7C1P0;C9JXZ7;C9JGY5;F8WE44	Replication factor C subunit 4	RFC4	sp|P35249|RFC4_HUMAN Replication factor C subunit 4 OS=Homo sapiens OX=9606 GN=RFC4 PE=1 SV=2;tr|C9JZI1|C9JZI1_HUMAN Replication factor C subunit 4 OS=Homo sapiens OX=9606 GN=RFC4 PE=1 SV=1;sp|P35249-2|RFC4_HUMAN Isoform 2 of Replication factor C subunit 4	1.13696	0.37497
1237	A8K607;Q9UIA9;E7ESC6;D3DSQ7;B4DSP8;E5RIW1;H0YBE1;Q96M10;Q546R4;Q9H2T7	Exportin-7	XPO7	tr|A8K607|A8K607_HUMAN cDNA FLJ76855, highly similar to Homo sapiens exportin 7 (XPO7), mRNA OS=Homo sapiens OX=9606 PE=2 SV=1;sp|Q9UIA9|XPO7_HUMAN Exportin-7 OS=Homo sapiens OX=9606 GN=XPO7 PE=1 SV=3;tr|E7ESC6|E7ESC6_HUMAN Exportin-7 OS=Homo sapiens OX=96	-1.08624	1.01746
2773	Q2NKY5;K7EK43		TUBB6	tr|Q2NKY5|Q2NKY5_HUMAN Tubulin beta chain OS=Homo sapiens OX=9606 GN=TUBB6 PE=2 SV=1	-0.13314	0.669608
980	Q96BC0;A0A1U9X8I7;Q9NPK3;O76046;A0A1U9X8J6;A0A1U9X8J2;A0A1U9X8J1;A0A1U9X8J0;A0A1U9X8I9;Q15477;B4DSY1;B4E0N1;B4DM01;A0A024RCU1;Q59F56;H7C5N0;H7C4L3;B4DF09;B4E0B4	Helicase SKI2W	SKIV2L;SKI2W	tr|Q96BC0|Q96BC0_HUMAN SKIV2L OS=Homo sapiens OX=9606 GN=SKIV2L PE=2 SV=1;tr|A0A1U9X8I7|A0A1U9X8I7_HUMAN SKIV2L OS=Homo sapiens OX=9606 PE=4 SV=1;tr|Q9NPK3|Q9NPK3_HUMAN DJ34F7.7 (Superkiller viralicidic activity 2 (S. cerevisiae homolog)-like (SKI2W)) OS=H	-0.645189	0.636655
121	A0A024R179;Q09161;X6R941	Nuclear cap-binding protein subunit 1	NCBP1	tr|A0A024R179|A0A024R179_HUMAN Nuclear cap binding protein subunit 1, 80kDa, isoform CRA_a OS=Homo sapiens OX=9606 GN=NCBP1 PE=4 SV=1;sp|Q09161|NCBP1_HUMAN Nuclear cap-binding protein subunit 1 OS=Homo sapiens OX=9606 GN=NCBP1 PE=1 SV=1	-0.43824	0.483378
2148	O43159;E9PPP6;E9PPY3	Ribosomal RNA-processing protein 8	RRP8	sp|O43159|RRP8_HUMAN Ribosomal RNA-processing protein 8 OS=Homo sapiens OX=9606 GN=RRP8 PE=1 SV=2;tr|E9PPP6|E9PPP6_HUMAN Ribosomal RNA-processing protein 8 OS=Homo sapiens OX=9606 GN=RRP8 PE=1 SV=1;tr|E9PPY3|E9PPY3_HUMAN Ribosomal RNA-processing protein 8	0.956368	0.76856
1113	B3KT81;A3KMH1-2;A3KMH1-3;A3KMH1	von Willebrand factor A domain-containing protein 8	VWA8	tr|B3KT81|B3KT81_HUMAN cDNA FLJ37836 fis, clone BRSSN2010587, weakly similar to Homo sapiens MDN1, midasin homolog (yeast) (MDN1), mRNA OS=Homo sapiens OX=9606 PE=2 SV=1;sp|A3KMH1-2|VWA8_HUMAN Isoform 2 of von Willebrand factor A domain-containing protein	17.8018	0.536023
3143	Q96GM8;B4DP23;Q96GM8-2;B3KSC7	Target of EGR1 protein 1	TOE1	sp|Q96GM8|TOE1_HUMAN Target of EGR1 protein 1 OS=Homo sapiens OX=9606 GN=TOE1 PE=1 SV=1;tr|B4DP23|B4DP23_HUMAN cDNA FLJ57546, highly similar to Homo sapiens target of EGR1, member 1 (nuclear) (TOE1), mRNA OS=Homo sapiens OX=9606 PE=2 SV=1;sp|Q96GM8-2|TOE1_	-1.3259	0.414903
2048	J3KR97;Q9BTW9;Q9BTW9-4;A0A0J9YVR1;B4DE53;I3L120;I6L959;Q9BTW9-5;A0A0J9YVU1;I3L439	Tubulin-specific chaperone D	TBCD	tr|J3KR97|J3KR97_HUMAN Tubulin-specific chaperone D OS=Homo sapiens OX=9606 GN=TBCD PE=1 SV=1;sp|Q9BTW9|TBCD_HUMAN Tubulin-specific chaperone D OS=Homo sapiens OX=9606 GN=TBCD PE=1 SV=2;sp|Q9BTW9-4|TBCD_HUMAN Isoform 4 of Tubulin-specific chaperone D OS=Ho	1.11044	0.431645
1526	B4DS79;B4DG47;B4DKH5			tr|B4DS79|B4DS79_HUMAN cDNA FLJ56828, highly similar to Adapter-relatedprotein complex 1 beta-1 subunit OS=Homo sapiens OX=9606 PE=2 SV=1;tr|B4DG47|B4DG47_HUMAN cDNA FLJ56967, highly similar to Adapter-relatedprotein complex 1 beta-1 subunit OS=Homo sapien	17.8879	0.60206
2471	Q5U045;P49674;Q53EZ1;B0QY35;B0QY34;B3KRV2;H0Y645;H0Y682;H0Y5S9	Casein kinase I isoform epsilon	CSNK1E	tr|Q5U045|Q5U045_HUMAN Casein kinase 1 epsilon OS=Homo sapiens OX=9606 GN=CSNK1E PE=2 SV=1;sp|P49674|KC1E_HUMAN Casein kinase I isoform epsilon OS=Homo sapiens OX=9606 GN=CSNK1E PE=1 SV=1;tr|Q53EZ1|Q53EZ1_HUMAN Casein kinase 1 epsilon variant (Fragment) OS	-1.72502	0.396358
1097	Q9NXG9;A1L3Z9;Q2TAL8;Q9H9Z1	Glutamine-rich protein 1	QRICH1	tr|Q9NXG9|Q9NXG9_HUMAN cDNA FLJ20259 fis, clone COLF7443 OS=Homo sapiens OX=9606 PE=2 SV=1;tr|A1L3Z9|A1L3Z9_HUMAN Glutamine-rich 1 OS=Homo sapiens OX=9606 GN=QRICH1 PE=2 SV=1;sp|Q2TAL8|QRIC1_HUMAN Glutamine-rich protein 1 OS=Homo sapiens OX=9606 GN=QRICH1	19.9207	1.21785
2489	P51617-4;P51617-2;P51617;D3YTB5;P51617-3;H7C1F0;F8WAB6;H7C224;H7C2I6	Interleukin-1 receptor-associated kinase 1	IRAK1	sp|P51617-4|IRAK1_HUMAN Isoform 4 of Interleukin-1 receptor-associated kinase 1 OS=Homo sapiens OX=9606 GN=IRAK1;sp|P51617-2|IRAK1_HUMAN Isoform 2 of Interleukin-1 receptor-associated kinase 1 OS=Homo sapiens OX=9606 GN=IRAK1;sp|P51617|IRAK1_HUMAN Interleu	17.9237	0.60206
675	A0A087X2E5;A0A087WZN1;O43837-2;O43837;O43837-3;A0A0D9SG66;Q9UIC5;L0R875	Isocitrate dehydrogenase [NAD] subunit, mitochondrial;Isocitrate dehydrogenase [NAD] subunit beta, mitochondrial	IDH3B	tr|A0A087X2E5|A0A087X2E5_HUMAN Isocitrate dehydrogenase [NAD] subunit, mitochondrial OS=Homo sapiens OX=9606 GN=IDH3B PE=1 SV=1;tr|A0A087WZN1|A0A087WZN1_HUMAN Isocitrate dehydrogenase [NAD] subunit, mitochondrial OS=Homo sapiens OX=9606 GN=IDH3B PE=1 SV=1;	17.9419	0.60206
2726	Q15120;Q15120-2	[Pyruvate dehydrogenase (acetyl-transferring)] kinase isozyme 3, mitochondrial	PDK3	sp|Q15120|PDK3_HUMAN [Pyruvate dehydrogenase (acetyl-transferring)] kinase isozyme 3, mitochondrial OS=Homo sapiens OX=9606 GN=PDK3 PE=1 SV=1;sp|Q15120-2|PDK3_HUMAN Isoform 2 of [Pyruvate dehydrogenase (acetyl-transferring)] kinase isozyme 3, mitochondrial	17.9448	0.60206
1214	A8K4P8;Q14146;Q6PCC8	Unhealthy ribosome biogenesis protein 2 homolog	URB2	tr|A8K4P8|A8K4P8_HUMAN cDNA FLJ75337 OS=Homo sapiens OX=9606 PE=2 SV=1;sp|Q14146|URB2_HUMAN Unhealthy ribosome biogenesis protein 2 homolog OS=Homo sapiens OX=9606 GN=URB2 PE=2 SV=2	18.4538	0.911208
49	A0A024QZJ6;A0A024QZJ4;B1PS43;P35749-4;P35749-3;P35749;P35749-2;Q7Z7R0;O14729;O14794;Q66K75;Q68D89	Myosin-11	MYH11	tr|A0A024QZJ6|A0A024QZJ6_HUMAN Myosin, heavy polypeptide 11, smooth muscle, isoform CRA_b OS=Homo sapiens OX=9606 GN=MYH11 PE=3 SV=1;tr|A0A024QZJ4|A0A024QZJ4_HUMAN Myosin, heavy polypeptide 11, smooth muscle, isoform CRA_a OS=Homo sapiens OX=9606 GN=MYH11	3.27011	0.634906
3153	Q96J84;Q96J84-2;B4DN67;Q96J84-3	Kin of IRRE-like protein 1	KIRREL	sp|Q96J84|KIRR1_HUMAN Kin of IRRE-like protein 1 OS=Homo sapiens OX=9606 GN=KIRREL1 PE=1 SV=2;sp|Q96J84-2|KIRR1_HUMAN Isoform 2 of Kin of IRRE-like protein 1 OS=Homo sapiens OX=9606 GN=KIRREL1;tr|B4DN67|B4DN67_HUMAN cDNA FLJ56360, highly similar to Kin of	1.49029	0.686242
869	A0A0S2Z5B2;O00257;A0A0S2Z4Q9;O00257-3;F8WCW6;I3L4F1	E3 SUMO-protein ligase CBX4	CBX4	tr|A0A0S2Z5B2|A0A0S2Z5B2_HUMAN Chromobox homolog 4 (Pc class homolog, Drosophila), isoform CRA_a (Fragment) OS=Homo sapiens OX=9606 GN=CBX4 PE=2 SV=1;sp|O00257|CBX4_HUMAN E3 SUMO-protein ligase CBX4 OS=Homo sapiens OX=9606 GN=CBX4 PE=1 SV=3;tr|A0A0S2Z4Q9|A	-3.79651	1.56497
2988	Q86W42-3;Q86W42;Q86W42-2	THO complex subunit 6 homolog	THOC6	sp|Q86W42-3|THOC6_HUMAN Isoform 3 of THO complex subunit 6 homolog OS=Homo sapiens OX=9606 GN=THOC6;sp|Q86W42|THOC6_HUMAN THO complex subunit 6 homolog OS=Homo sapiens OX=9606 GN=THOC6 PE=1 SV=1;sp|Q86W42-2|THOC6_HUMAN Isoform 2 of THO complex subunit 6 ho	19.005	2.01875
2721	Q15046;Q15046-2;H3BVA8;Q6ZTI3;J3KRL2;H3BPV7	Lysine--tRNA ligase	KARS	sp|Q15046|SYK_HUMAN Lysine--tRNA ligase OS=Homo sapiens OX=9606 GN=KARS PE=1 SV=3;sp|Q15046-2|SYK_HUMAN Isoform Mitochondrial of Lysine--tRNA ligase OS=Homo sapiens OX=9606 GN=KARS	-1.85784	0.872954
349	F4ZW64;A8K590;F4ZW65;A0A024R7C7;F4ZW66;Q12906-5;Q12906-4;Q12906-2;Q12906-6;Q12906-3;Q12906;Q12906-7;B4DFG4;B4DDF3;Q59GP7;K7EQR9;K7EKJ9;K7EPG3;K7EKY0	Interleukin enhancer-binding factor 3	ILF3	tr|F4ZW64|F4ZW64_HUMAN NF90a OS=Homo sapiens OX=9606 PE=2 SV=1;tr|A8K590|A8K590_HUMAN cDNA FLJ77456, highly similar to Homo sapiens interleukin enhancer binding factor 3, 90kDa (ILF3), transcript variant 2, mRNA OS=Homo sapiens OX=9606 PE=2 SV=1;tr|F4ZW65|	-0.561501	1.40645
925	F5GZ78;B3KVL0;A0A140VJQ8;A0A1B0GTU4;P49023-4;P49023-2;P49023;P49023-3;B4DRY6;Q6ZQU7;Q9BTK0;A0A1B0GV30;A0A1B0GU60;Q59GS5	Paxillin	PXN	tr|F5GZ78|F5GZ78_HUMAN Paxillin OS=Homo sapiens OX=9606 GN=PXN PE=1 SV=1;tr|B3KVL0|B3KVL0_HUMAN cDNA FLJ16691 fis, clone TRACH3000692, highly similar to Paxillin OS=Homo sapiens OX=9606 PE=2 SV=1;tr|A0A140VJQ8|A0A140VJQ8_HUMAN Paxillin, isoform CRA_e OS=Ho	1.66496	0.778414
2458	P48426-2;P48426;H7BXS3;B4DH09;S4R320	Phosphatidylinositol 5-phosphate 4-kinase type-2 alpha	PIP4K2A	sp|P48426-2|PI42A_HUMAN Isoform 2 of Phosphatidylinositol 5-phosphate 4-kinase type-2 alpha OS=Homo sapiens OX=9606 GN=PIP4K2A;sp|P48426|PI42A_HUMAN Phosphatidylinositol 5-phosphate 4-kinase type-2 alpha OS=Homo sapiens OX=9606 GN=PIP4K2A PE=1 SV=2;tr|H7BX	17.9928	0.60206
1094	A1JUI8		CCT6A	tr|A1JUI8|A1JUI8_HUMAN Chaperonin subunit 6A (Fragment) OS=Homo sapiens OX=9606 GN=CCT6A PE=2 SV=1	17.9999	0.60206
2801	Q53GS7;B3KMG0;A8K3B8;Q53GS7-2	Nucleoporin GLE1	GLE1	sp|Q53GS7|GLE1_HUMAN Nucleoporin GLE1 OS=Homo sapiens OX=9606 GN=GLE1 PE=1 SV=2;tr|B3KMG0|B3KMG0_HUMAN cDNA FLJ10905 fis, clone OVARC1000014, highly similar to Nucleoporin GLE1 OS=Homo sapiens OX=9606 PE=2 SV=1;tr|A8K3B8|A8K3B8_HUMAN cDNA FLJ77684 OS=Homo	18.6603	1.08115
2158	O43464;A0A0C4DG44;A8K7G2;O43464-3;O43464-4;O43464-2;B2BKJ3;P83110-2;P83110	Serine protease HTRA2, mitochondrial	HTRA2	sp|O43464|HTRA2_HUMAN Serine protease HTRA2, mitochondrial OS=Homo sapiens OX=9606 GN=HTRA2 PE=1 SV=2;tr|A0A0C4DG44|A0A0C4DG44_HUMAN Serine protease HTRA2, mitochondrial (Fragment) OS=Homo sapiens OX=9606 GN=HTRA2 PE=1 SV=1;tr|A8K7G2|A8K7G2_HUMAN cDNA FLJ7	-1.41794	2.059
484	A0A024RAJ8;E7EWC2;F5H7S7;Q13576;Q59HA3;B7Z7U6;B7Z881;Q13576-3;Q13576-2;D6R939;B7Z7X2;E9PDT6	Ras GTPase-activating-like protein IQGAP2	IQGAP2	tr|A0A024RAJ8|A0A024RAJ8_HUMAN IQ motif containing GTPase activating protein 2, isoform CRA_b OS=Homo sapiens OX=9606 GN=IQGAP2 PE=4 SV=1;tr|E7EWC2|E7EWC2_HUMAN Ras GTPase-activating-like protein IQGAP2 (Fragment) OS=Homo sapiens OX=9606 GN=IQGAP2 PE=1 SV=	0.771618	0.48003
3385	Q9Y2A7;Q9Y2A7-2;B3KMK7;B3KM75	Nck-associated protein 1	NCKAP1	sp|Q9Y2A7|NCKP1_HUMAN Nck-associated protein 1 OS=Homo sapiens OX=9606 GN=NCKAP1 PE=1 SV=1;sp|Q9Y2A7-2|NCKP1_HUMAN Isoform 2 of Nck-associated protein 1 OS=Homo sapiens OX=9606 GN=NCKAP1;tr|B3KMK7|B3KMK7_HUMAN cDNA FLJ11291 fis, clone PLACE1009659, highly	0.368394	0.425288
1426	B2RNR6;Q96KR1;A8K849;H0Y8W1;B3KP82;B3KVS4;Q05D65	Zinc finger RNA-binding protein	ZFR	tr|B2RNR6|B2RNR6_HUMAN Zinc finger RNA binding protein OS=Homo sapiens OX=9606 GN=ZFR PE=2 SV=1;sp|Q96KR1|ZFR_HUMAN Zinc finger RNA-binding protein OS=Homo sapiens OX=9606 GN=ZFR PE=1 SV=2	-2.32935	0.865198
3277	Q9NRL6			tr|Q9NRL6|Q9NRL6_HUMAN CLK4 OS=Homo sapiens OX=9606 PE=2 SV=1	0.352399	1.55946
2505	Q59FW4;Q86V38;P54259	Atrophin-1	ATN1	tr|Q59FW4|Q59FW4_HUMAN Atrophin-1 variant (Fragment) OS=Homo sapiens OX=9606 PE=2 SV=1;tr|Q86V38|Q86V38_HUMAN Atrophin 1 OS=Homo sapiens OX=9606 GN=ATN1 PE=1 SV=1;sp|P54259|ATN1_HUMAN Atrophin-1 OS=Homo sapiens OX=9606 GN=ATN1 PE=1 SV=3	-2.49129	0.526024
3362	Q9UKV3-5	Apoptotic chromatin condensation inducer in the nucleus	ACIN1	sp|Q9UKV3-5|ACINU_HUMAN Isoform 4 of Apoptotic chromatin condensation inducer in the nucleus OS=Homo sapiens OX=9606 GN=ACIN1	19.5552	1.01864
383	A0A024R857;Q96ME1-4;B3KTC9;H0Y6I6;Q96ME1-2;Q96ME1;B4DH63;Q96ME1-3	F-box/LRR-repeat protein 18	FBXL18	tr|A0A024R857|A0A024R857_HUMAN F-box and leucine-rich repeat protein 18, isoform CRA_b OS=Homo sapiens OX=9606 GN=FBXL18 PE=4 SV=1;sp|Q96ME1-4|FXL18_HUMAN Isoform 4 of F-box/LRR-repeat protein 18 OS=Homo sapiens OX=9606 GN=FBXL18;tr|B3KTC9|B3KTC9_HUMAN cDN	1.67306	1.45098
117	A0A024R157;Q16739	Ceramide glucosyltransferase	UGCG	tr|A0A024R157|A0A024R157_HUMAN UDP-glucose ceramide glucosyltransferase, isoform CRA_a OS=Homo sapiens OX=9606 GN=UGCG PE=4 SV=1;sp|Q16739|CEGT_HUMAN Ceramide glucosyltransferase OS=Homo sapiens OX=9606 GN=UGCG PE=1 SV=1	19.1808	1.69394
2103	O00186	Syntaxin-binding protein 3	STXBP3	sp|O00186|STXB3_HUMAN Syntaxin-binding protein 3 OS=Homo sapiens OX=9606 GN=STXBP3 PE=1 SV=2	0.855452	0.712557
877	B4DRU9;A0A0S2Z5L1;Q9NUQ8-2;Q9NUQ8;A0A0S2Z645	ATP-binding cassette sub-family F member 3	ABCF3	tr|B4DRU9|B4DRU9_HUMAN cDNA FLJ57179, highly similar to Homo sapiens ATP-binding cassette, sub-family F (GCN20), member 3 (ABCF3), mRNA OS=Homo sapiens OX=9606 PE=2 SV=1;tr|A0A0S2Z5L1|A0A0S2Z5L1_HUMAN ATP-binding cassette sub-family F member 3 isoform 1 (F	-1.01353	2.85743
1681	Q6FI27;B5BUC0;P49841;P49841-2;Q86TM2	Glycogen synthase kinase-3 beta	GSK3B	tr|Q6FI27|Q6FI27_HUMAN GSK3B protein OS=Homo sapiens OX=9606 GN=GSK3B PE=2 SV=1;tr|B5BUC0|B5BUC0_HUMAN Glycogen synthase kinase-3 beta (Fragment) OS=Homo sapiens OX=9606 GN=GSK3B PE=2 SV=1;sp|P49841|GSK3B_HUMAN Glycogen synthase kinase-3 beta OS=Homo sapie	-2.6725	2.21986
1280	C9JVN9;A8K9B2;Q9H9P8-2;Q9H9P8;G3V5S1;G3V272	L-2-hydroxyglutarate dehydrogenase, mitochondrial	L2HGDH	tr|C9JVN9|C9JVN9_HUMAN L-2-hydroxyglutarate dehydrogenase, mitochondrial OS=Homo sapiens OX=9606 GN=L2HGDH PE=1 SV=1;tr|A8K9B2|A8K9B2_HUMAN cDNA FLJ76725, highly similar to Homo sapiens L-2-hydroxyglutarate dehydrogenase (L2HGDH), mRNA OS=Homo sapiens OX=9	18.827	0.340093
2709	Q14683;G8JLG1;A8K7A6;Q6P2R1;Q6MZR8;Q68EN4;H0Y7K8;Q5H934;Q7Z4C6;B7Z709;V9GY57;V9GYN9	Structural maintenance of chromosomes protein 1A;Structural maintenance of chromosomes protein	SMC1A;DKFZp686L19178	sp|Q14683|SMC1A_HUMAN Structural maintenance of chromosomes protein 1A OS=Homo sapiens OX=9606 GN=SMC1A PE=1 SV=2;tr|G8JLG1|G8JLG1_HUMAN Structural maintenance of chromosomes protein OS=Homo sapiens OX=9606 GN=SMC1A PE=1 SV=2;tr|A8K7A6|A8K7A6_HUMAN cDNA FL	0.263026	0.698917
801	A0A1E1ERW3;H9KV28;A0A2R8Y5N1;A0RZB8;A0A140T8Z0;Q6URC4;A0A0G2JH68;O60610-2;O60610-3;O60610;B4E2I7;A0A2R8YEF8;A0RZB7;B4DVR3	Protein diaphanous homolog 1	DIAPH1	tr|A0A1E1ERW3|A0A1E1ERW3_HUMAN Diaphanous homolog 1 OS=Homo sapiens OX=9606 GN=DIAPH1 PE=2 SV=1;tr|H9KV28|H9KV28_HUMAN Protein diaphanous homolog 1 OS=Homo sapiens OX=9606 GN=DIAPH1 PE=1 SV=2;tr|A0A2R8Y5N1|A0A2R8Y5N1_HUMAN Protein diaphanous homolog 1 OS=H	18.1255	0.407258
1056	V9H023;V9H068;A0A2R8Y7S8;Q53RU4;V9H019;Q53GS1;Q53FK0;A0A2R8YFH0;E9PHA6;A0A2R8Y6P0;A0A2R8YG02;P43246;V9H0D5;B4DN49;P43246-2;V9H062;V9H015;V9H0B2;B4DL39;B4DSB9;C9J809;Q0ZAJ2	DNA mismatch repair protein Msh2	MSH2	tr|V9H023|V9H023_HUMAN MSH2 protein OS=Homo sapiens OX=9606 GN=MSH2 PE=2 SV=1;tr|V9H068|V9H068_HUMAN MSH2 protein OS=Homo sapiens OX=9606 GN=MSH2 PE=2 SV=1;tr|A0A2R8Y7S8|A0A2R8Y7S8_HUMAN DNA mismatch repair protein Msh2 OS=Homo sapiens OX=9606 GN=MSH2 PE=1	-1.53685	0.743643
242	Q9H8N9;A0A024R488;Q8IWB7	WD repeat and FYVE domain-containing protein 1	WDFY1	tr|Q9H8N9|Q9H8N9_HUMAN cDNA FLJ13353 fis, clone OVARC1002182, weakly similar to BETA-TRCP (BETA-TRANSDUCIN REPEAT-CONTAINING PROTEIN) OS=Homo sapiens OX=9606 PE=2 SV=1;tr|A0A024R488|A0A024R488_HUMAN WD repeat and FYVE domain containing 1, isoform CRA_a OS=	0.00959449	0.60206
1255	A8K7A1;Q9Y6V7;Q69YV6;Q9NVY6;Q9Y6V7-2;M0R1S3;M0QZC0;M0R0K1	Probable ATP-dependent RNA helicase DDX49	DDX49;DKFZp564G1016	tr|A8K7A1|A8K7A1_HUMAN cDNA FLJ77346, highly similar to Homo sapiens DEAD (Asp-Glu-Ala-Asp) box polypeptide 49 (DDX49), mRNA OS=Homo sapiens OX=9606 PE=2 SV=1;sp|Q9Y6V7|DDX49_HUMAN Probable ATP-dependent RNA helicase DDX49 OS=Homo sapiens OX=9606 GN=DDX49	-1.86354	0.630115
3361	Q9UKN8;Q05CN7;F2Z356;B3KNH2	General transcription factor 3C polypeptide 4	GTF3C4	sp|Q9UKN8|TF3C4_HUMAN General transcription factor 3C polypeptide 4 OS=Homo sapiens OX=9606 GN=GTF3C4 PE=1 SV=2;tr|Q05CN7|Q05CN7_HUMAN GTF3C4 protein (Fragment) OS=Homo sapiens OX=9606 GN=GTF3C4 PE=2 SV=1	0.707213	0.420689
152	A0A024R1U0;P46060;B4DY16;B4E0U0;Q9BSK3;H0Y4Q3;Q8WUS7;B0QYT5;B0QYT4	Ran GTPase-activating protein 1	RANGAP1	tr|A0A024R1U0|A0A024R1U0_HUMAN Ran GTPase activating protein 1, isoform CRA_d OS=Homo sapiens OX=9606 GN=RANGAP1 PE=4 SV=1;sp|P46060|RAGP1_HUMAN Ran GTPase-activating protein 1 OS=Homo sapiens OX=9606 GN=RANGAP1 PE=1 SV=1;tr|B4DY16|B4DY16_HUMAN cDNA FLJ513	-2.96479	2.29326
933	A0A140VJZ1;P45974-2;P45974;H7C5J3;A0A0A6YZ17;Q92995-2;Q92995	Ubiquitin carboxyl-terminal hydrolase 5	USP5	tr|A0A140VJZ1|A0A140VJZ1_HUMAN Ubiquitin carboxyl-terminal hydrolase OS=Homo sapiens OX=9606 PE=2 SV=1;sp|P45974-2|UBP5_HUMAN Isoform Short of Ubiquitin carboxyl-terminal hydrolase 5 OS=Homo sapiens OX=9606 GN=USP5;sp|P45974|UBP5_HUMAN Ubiquitin carboxyl-t	1.87066	1.29191
3004	Q8IWV8-4;Q8IWV8;B4E215;Q8IWV8-3;Q8IWV8-2;B3KXG6	E3 ubiquitin-protein ligase UBR2	UBR2	sp|Q8IWV8-4|UBR2_HUMAN Isoform 4 of E3 ubiquitin-protein ligase UBR2 OS=Homo sapiens OX=9606 GN=UBR2;sp|Q8IWV8|UBR2_HUMAN E3 ubiquitin-protein ligase UBR2 OS=Homo sapiens OX=9606 GN=UBR2 PE=1 SV=1;tr|B4E215|B4E215_HUMAN cDNA FLJ55442, highly similar to Ubi	-0.457493	0.524495
2871	Q5UIP0-2;Q5UIP0;B4DRJ4;H7BZN3;B4DS49;H7C2B5	Telomere-associated protein RIF1	RIF1	sp|Q5UIP0-2|RIF1_HUMAN Isoform 2 of Telomere-associated protein RIF1 OS=Homo sapiens OX=9606 GN=RIF1;sp|Q5UIP0|RIF1_HUMAN Telomere-associated protein RIF1 OS=Homo sapiens OX=9606 GN=RIF1 PE=1 SV=2;tr|B4DRJ4|B4DRJ4_HUMAN cDNA FLJ55392, highly similar to Tel	1.5861	1.40797
951	A0A142CHG9;G3V1P7;B7Z581			tr|A0A142CHG9|A0A142CHG9_HUMAN GO2-q chimeric G-protein OS=Homo sapiens OX=9606 PE=2 SV=1	18.1899	0.60206
3410	Q9Y4R8;H3BRS3;B4DXS2;B4DFV7;B3KMG2;H3BU45	Telomere length regulation protein TEL2 homolog	TELO2	sp|Q9Y4R8|TELO2_HUMAN Telomere length regulation protein TEL2 homolog OS=Homo sapiens OX=9606 GN=TELO2 PE=1 SV=2;tr|H3BRS3|H3BRS3_HUMAN Telomere length regulation protein TEL2 homolog OS=Homo sapiens OX=9606 GN=TELO2 PE=1 SV=1;tr|B4DXS2|B4DXS2_HUMAN cDNA F	-1.03049	0.873644
3024	Q8N3C0;B4DR60;Q8N3C0-4	Activating signal cointegrator 1 complex subunit 3	ASCC3	sp|Q8N3C0|ASCC3_HUMAN Activating signal cointegrator 1 complex subunit 3 OS=Homo sapiens OX=9606 GN=ASCC3 PE=1 SV=3;tr|B4DR60|B4DR60_HUMAN cDNA FLJ56882, highly similar to Activating signal cointegrator 1 complex subunit 3 (Fragment) OS=Homo sapiens OX=960	0.302087	1.05628
3414	Q9Y512	Sorting and assembly machinery component 50 homolog	SAMM50	sp|Q9Y512|SAM50_HUMAN Sorting and assembly machinery component 50 homolog OS=Homo sapiens OX=9606 GN=SAMM50 PE=1 SV=3	18.9732	1.28266
1057	A0A2R8Y793;G5E9R0;C9JUM1;C9JZR7;C9JTX5;K4EQ44;K4EP00;K4ENJ5;Q562N0;Q562L5;F8WCH0;Q562U2;Q562N6;Q562N4;A0A173GMX0;Q562P0;Q562N2;Q562P9;Q562X1;Q562U0;Q562T8;Q562R0;Q562Q6;Q562P8			tr|A0A2R8Y793|A0A2R8Y793_HUMAN Actin, cytoplasmic 1 (Fragment) OS=Homo sapiens OX=9606 GN=ACTB PE=1 SV=1	18.1967	0.60206
1221	A8K4Z6;Q9BRD0;Q9BRD0-2;H7C462	BUD13 homolog	BUD13	tr|A8K4Z6|A8K4Z6_HUMAN cDNA FLJ76180 OS=Homo sapiens OX=9606 PE=2 SV=1;sp|Q9BRD0|BUD13_HUMAN BUD13 homolog OS=Homo sapiens OX=9606 GN=BUD13 PE=1 SV=1;sp|Q9BRD0-2|BUD13_HUMAN Isoform 2 of BUD13 homolog OS=Homo sapiens OX=9606 GN=BUD13	-0.0369114	0.350536
2923	Q6PJG6;Q6PJG6-3;Q9H7L8;Q6ZNL1;Q6PJG6-2	BRCA1-associated ATM activator 1	BRAT1	sp|Q6PJG6|BRAT1_HUMAN BRCA1-associated ATM activator 1 OS=Homo sapiens OX=9606 GN=BRAT1 PE=1 SV=2	-2.24516	2.00562
2849	Q5SNT2-2;Q5SNT2;H0Y4R5	Transmembrane protein 201	TMEM201	sp|Q5SNT2-2|TM201_HUMAN Isoform 2 of Transmembrane protein 201 OS=Homo sapiens OX=9606 GN=TMEM201;sp|Q5SNT2|TM201_HUMAN Transmembrane protein 201 OS=Homo sapiens OX=9606 GN=TMEM201 PE=1 SV=1;tr|H0Y4R5|H0Y4R5_HUMAN Transmembrane protein 201 (Fragment) OS=Ho	0.295717	0.702173
2321	P12036-2;P12036	Neurofilament heavy polypeptide	NEFH	sp|P12036-2|NFH_HUMAN Isoform 2 of Neurofilament heavy polypeptide OS=Homo sapiens OX=9606 GN=NEFH;sp|P12036|NFH_HUMAN Neurofilament heavy polypeptide OS=Homo sapiens OX=9606 GN=NEFH PE=1 SV=4	18.2326	0.60206
1330	B4DG22;B1AXG1;B7ZB17;P51812;B4DKZ2;A0A2R8Y7S9;A0A2R8Y603;B7Z3B5;F2Z2J1;Q15349;Q15349-3;Q9UK32-2;Q9UK32;Q15349-2;D6R910;D6RHW7;D6RA62;Q5SVM6;D6RE03	Ribosomal protein S6 kinase alpha-3	RPS6KA3	tr|B4DG22|B4DG22_HUMAN Non-specific serine/threonine protein kinase OS=Homo sapiens OX=9606 GN=RPS6KA3 PE=1 SV=1;tr|B1AXG1|B1AXG1_HUMAN Non-specific serine/threonine protein kinase OS=Homo sapiens OX=9606 GN=RPS6KA3 PE=1 SV=2;tr|B7ZB17|B7ZB17_HUMAN Non-spe	-0.183075	0.337219
3205	Q9BXP5-4;Q9BXP5-2;Q9BXP5-3;Q9BXP5;Q9BXP5-5;H7C3A1;Q7Z4Y3;H7C1K0;A0A286YEP7;H7C0U8;A0A0A0MSP6	Serrate RNA effector molecule homolog	SRRT	sp|Q9BXP5-4|SRRT_HUMAN Isoform 4 of Serrate RNA effector molecule homolog OS=Homo sapiens OX=9606 GN=SRRT;sp|Q9BXP5-2|SRRT_HUMAN Isoform 2 of Serrate RNA effector molecule homolog OS=Homo sapiens OX=9606 GN=SRRT;sp|Q9BXP5-3|SRRT_HUMAN Isoform 3 of Serrate	-5.05703	2.05692
1672	B4E343;Q9BVJ6;Q9BVJ6-3;O60531;X6RJY0;Q08E77;A0A024RDV0;Q9BVJ6-2;Q5TAP6	U3 small nucleolar RNA-associated protein 14 homolog A	UTP14A	tr|B4E343|B4E343_HUMAN cDNA FLJ54249, highly similar to U3 small nucleolar RNA-associated protein 14 homolog A OS=Homo sapiens OX=9606 PE=2 SV=1;sp|Q9BVJ6|UT14A_HUMAN U3 small nucleolar RNA-associated protein 14 homolog A OS=Homo sapiens OX=9606 GN=UTP14A	1.29061	0.63378
2956	Q7L0Y3;C9JVB6	Mitochondrial ribonuclease P protein 1	TRMT10C	sp|Q7L0Y3|TM10C_HUMAN tRNA methyltransferase 10 homolog C OS=Homo sapiens OX=9606 GN=TRMT10C PE=1 SV=2;tr|C9JVB6|C9JVB6_HUMAN tRNA methyltransferase 10 homolog C (Fragment) OS=Homo sapiens OX=9606 GN=TRMT10C PE=1 SV=1	2.79862	0.556462
106	A0A024R0Y2;B2ZZ90;Q13085-3;Q13085-2;Q13085;Q13085-4;Q59FY4;Q7Z5W8;B4DIG6;B4DIW1;B4DWK9;B4DIR2;A0A087X0W4;S4R3S7;B4DK31	Acetyl-CoA carboxylase 1;Biotin carboxylase	hCG_30204;ACACA	tr|A0A024R0Y2|A0A024R0Y2_HUMAN HCG30204, isoform CRA_a OS=Homo sapiens OX=9606 GN=hCG_30204 PE=4 SV=1;tr|B2ZZ90|B2ZZ90_HUMAN Acetyl-Coenzyme A carboxylase alpha OS=Homo sapiens OX=9606 GN=ACACA PE=2 SV=1;sp|Q13085-3|ACACA_HUMAN Isoform 3 of Acetyl-CoA carb	-0.971418	0.694822
2860	Q5T4S7-3;Q5T4S7-4;Q5T4S7;Q5T4S7-2;Q5T4S7-5;A0A0A0MSW0;A0A024RAC9;X6R960;B3KMT2;B4DYV5;B4DPF6;X6RE05;B3KM62;Q96HY5	E3 ubiquitin-protein ligase UBR4	UBR4	sp|Q5T4S7-3|UBR4_HUMAN Isoform 3 of E3 ubiquitin-protein ligase UBR4 OS=Homo sapiens OX=9606 GN=UBR4;sp|Q5T4S7-4|UBR4_HUMAN Isoform 4 of E3 ubiquitin-protein ligase UBR4 OS=Homo sapiens OX=9606 GN=UBR4;sp|Q5T4S7|UBR4_HUMAN E3 ubiquitin-protein ligase UBR4	-1.96347	1.24083
3059	Q8NI27;A0A0C4DG98;B4DKZ6;Q6P441;H0Y815;F2Z2V2	THO complex subunit 2	THOC2	sp|Q8NI27|THOC2_HUMAN THO complex subunit 2 OS=Homo sapiens OX=9606 GN=THOC2 PE=1 SV=2;tr|A0A0C4DG98|A0A0C4DG98_HUMAN THO complex subunit 2 OS=Homo sapiens OX=9606 GN=THOC2 PE=1 SV=1;tr|B4DKZ6|B4DKZ6_HUMAN cDNA FLJ61096, highly similar to THO complex subun	1.34473	0.60981
310	Q6NUM7;A0A024R640;Q9NUQ2;E5RH21;H0YC22	1-acyl-sn-glycerol-3-phosphate acyltransferase epsilon	AGPAT5	tr|Q6NUM7|Q6NUM7_HUMAN AGPAT5 protein (Fragment) OS=Homo sapiens OX=9606 GN=AGPAT5 PE=2 SV=1;tr|A0A024R640|A0A024R640_HUMAN 1-acylglycerol-3-phosphate O-acyltransferase 5 (Lysophosphatidic acid acyltransferase, epsilon), isoform CRA_a OS=Homo sapiens OX=96	18.625	0.767322
527	A0A024RBC7;P20020-5;P20020-2;P20020-6;P20020;P20020-4;P20020-1;Q59H63;E7ERY9;A8K8U3;A7E2D8;Q68DH9;A0A024R968;P23634-5;P23634-4;P23634-3;P23634-2;P23634-7;P23634-6;P23634-8;P23634;Q16720-8;Q16720-7;Q16720-6;Q16720-3;Q16720-5;Q16720-2;Q16720-4;Q16720;A0A0U1RQU3;Q58F24;A1X4P8;A1L3B5;A0A2R8Y4R4;Q4J697;H0Y7S3;A0A2U3U055;A0A2U3TZI3;A0A024R2E4;Q4LE63;A0A024R2K6;Q01814-4;Q01814-7;Q01814-3;Q01814-6;Q01814…	Calcium-transporting ATPase;Plasma membrane calcium-transporting ATPase 1;Plasma membrane calcium-transporting ATPase 4	ATP2B1;ATP2B4;DKFZp686M088	tr|A0A024RBC7|A0A024RBC7_HUMAN Calcium-transporting ATPase OS=Homo sapiens OX=9606 GN=ATP2B1 PE=3 SV=1;sp|P20020-5|AT2B1_HUMAN Isoform E of Plasma membrane calcium-transporting ATPase 1 OS=Homo sapiens OX=9606 GN=ATP2B1;sp|P20020-2|AT2B1_HUMAN Isoform A of	0.826306	1.96573
2218	O94913;E9PKN0;E9PNY7	Pre-mRNA cleavage complex 2 protein Pcf11	PCF11	sp|O94913|PCF11_HUMAN Pre-mRNA cleavage complex 2 protein Pcf11 OS=Homo sapiens OX=9606 GN=PCF11 PE=1 SV=3;tr|E9PKN0|E9PKN0_HUMAN Pre-mRNA cleavage complex 2 protein Pcf11 (Fragment) OS=Homo sapiens OX=9606 GN=PCF11 PE=1 SV=1	-4.30984	1.68193
190	A0A2R8Y804;B4DSW9;A0A2R8Y543;A0A2R8Y5C3;B4DL06;A0A2R8Y750;A0A2R8Y5Z1;B4DGU4;A0A2R8YCH5;A0A2R8Y7Z0;B5BU28;A0A024R2Q3;A0A2R8Y5A3;P35222;A0A2R8Y6G0;A0A2R8Y815	Catenin beta-1	CTNNB1	tr|A0A2R8Y804|A0A2R8Y804_HUMAN Catenin beta-1 OS=Homo sapiens OX=9606 GN=CTNNB1 PE=1 SV=1;tr|B4DSW9|B4DSW9_HUMAN cDNA FLJ59415, highly similar to Beta-catenin OS=Homo sapiens OX=9606 PE=2 SV=1;tr|A0A2R8Y543|A0A2R8Y543_HUMAN Catenin beta-1 OS=Homo sapiens O	18.331	0.388816
1677	Q6IT96;B5BU61;Q13547;B4DRG0;Q5TEE2;B4DSK9;E5RK19;E5RFI6;E5RJ04;E5RGV4;E5RHE7;E5RH52;E5RG37;E5RFP9;H3BM24;B7Z3S4;Q5HYD4	Histone deacetylase;Histone deacetylase 1	HDAC1	tr|Q6IT96|Q6IT96_HUMAN Histone deacetylase OS=Homo sapiens OX=9606 GN=HDAC1 PE=2 SV=1;tr|B5BU61|B5BU61_HUMAN Histone deacetylase OS=Homo sapiens OX=9606 GN=HDAC1 PE=2 SV=1;sp|Q13547|HDAC1_HUMAN Histone deacetylase 1 OS=Homo sapiens OX=9606 GN=HDAC1 PE=1 SV	-1.33725	0.702035
300	B4DUC6;A8K8N5;A0A024R5S4;P40818-2;P40818;B3KRK3	Ubiquitin carboxyl-terminal hydrolase;Ubiquitin carboxyl-terminal hydrolase 8	USP8	tr|B4DUC6|B4DUC6_HUMAN cDNA FLJ53203, highly similar to Ubiquitin carboxyl-terminal hydrolase 8 OS=Homo sapiens OX=9606 PE=2 SV=1;tr|A8K8N5|A8K8N5_HUMAN cDNA FLJ76940, highly similar to Homo sapiens ubiquitin specific peptidase 8 (USP8), mRNA OS=Homo sapie	19.1606	1.38392
3180	Q9BSJ2;Q9BSJ2-4;F2Z2B9;B3KRS1;B4DS45;Q53EQ3;Q9BSJ2-3;B3KTU7	Gamma-tubulin complex component 2	TUBGCP2	sp|Q9BSJ2|GCP2_HUMAN Gamma-tubulin complex component 2 OS=Homo sapiens OX=9606 GN=TUBGCP2 PE=1 SV=2;sp|Q9BSJ2-4|GCP2_HUMAN Isoform 3 of Gamma-tubulin complex component 2 OS=Homo sapiens OX=9606 GN=TUBGCP2;tr|F2Z2B9|F2Z2B9_HUMAN Gamma-tubulin complex compon	0.152639	0.522609
2251	Q53FS0;O96019-2;O96019;Q6FI97;H7C5S0;C9JQT2	Actin-like protein 6A	ACTL6A;BAF53A	tr|Q53FS0|Q53FS0_HUMAN Actin-like 6A isoform 1 variant (Fragment) OS=Homo sapiens OX=9606 PE=2 SV=1;sp|O96019-2|ACL6A_HUMAN Isoform 2 of Actin-like protein 6A OS=Homo sapiens OX=9606 GN=ACTL6A;sp|O96019|ACL6A_HUMAN Actin-like protein 6A OS=Homo sapiens OX=	-2.75047	1.11721
1147	A6NDU8;A0A0C4DGW6	UPF0600 protein C5orf51	C5orf51	sp|A6NDU8|CE051_HUMAN UPF0600 protein C5orf51 OS=Homo sapiens OX=9606 GN=C5orf51 PE=1 SV=1;tr|A0A0C4DGW6|A0A0C4DGW6_HUMAN UPF0600 protein C5orf51 OS=Homo sapiens OX=9606 GN=C5orf51 PE=1 SV=1	1.22077	0.935576
2666	Q13242;H0YIB4;A8K3M9;S4R3G0;B4DFT9	Serine/arginine-rich splicing factor 9	SRSF9	sp|Q13242|SRSF9_HUMAN Serine/arginine-rich splicing factor 9 OS=Homo sapiens OX=9606 GN=SRSF9 PE=1 SV=1;tr|H0YIB4|H0YIB4_HUMAN Serine/arginine-rich-splicing factor 9 (Fragment) OS=Homo sapiens OX=9606 GN=SRSF9 PE=1 SV=8;tr|A8K3M9|A8K3M9_HUMAN cDNA FLJ76387	19.4643	1.73906
3069	Q8TDD1;Q8TDD1-2;F8VRX4;H0YHH7	ATP-dependent RNA helicase DDX54	DDX54	sp|Q8TDD1|DDX54_HUMAN ATP-dependent RNA helicase DDX54 OS=Homo sapiens OX=9606 GN=DDX54 PE=1 SV=2;sp|Q8TDD1-2|DDX54_HUMAN Isoform 2 of ATP-dependent RNA helicase DDX54 OS=Homo sapiens OX=9606 GN=DDX54;tr|F8VRX4|F8VRX4_HUMAN ATP-dependent RNA helicase DDX54	0.626707	0.510378
389	B5BU53;A0A024R880;P50750;P50750-2;B2R9L6;X6RE90	Cyclin-dependent kinase 9	CDK9	tr|B5BU53|B5BU53_HUMAN Cyclin-dependent kinase 9 OS=Homo sapiens OX=9606 GN=CDK9 PE=2 SV=1;tr|A0A024R880|A0A024R880_HUMAN Cyclin-dependent kinase 9 (CDC2-related kinase), isoform CRA_a OS=Homo sapiens OX=9606 GN=CDK9 PE=3 SV=1;sp|P50750|CDK9_HUMAN Cyclin-d	-3.28126	1.10176
33	A0A024QZ70;Q7L7X3-3;Q7L7X3	Serine/threonine-protein kinase TAO1	TAOK1	tr|A0A024QZ70|A0A024QZ70_HUMAN TAO kinase 1, isoform CRA_a OS=Homo sapiens OX=9606 GN=TAOK1 PE=4 SV=1;sp|Q7L7X3-3|TAOK1_HUMAN Isoform 3 of Serine/threonine-protein kinase TAO1 OS=Homo sapiens OX=9606 GN=TAOK1;sp|Q7L7X3|TAOK1_HUMAN Serine/threonine-protein	20.5359	0.795792
521	A0A024RBA9;Q9UL25;Q96GX3	Ras-related protein Rab-21	RAB21	tr|A0A024RBA9|A0A024RBA9_HUMAN RAB21, member RAS oncogene family, isoform CRA_a OS=Homo sapiens OX=9606 GN=RAB21 PE=4 SV=1;sp|Q9UL25|RAB21_HUMAN Ras-related protein Rab-21 OS=Homo sapiens OX=9606 GN=RAB21 PE=1 SV=3;tr|Q96GX3|Q96GX3_HUMAN KIAA0118 protein (	-1.8558	0.60206
247	B4E185;B3KRS6;A0A0S2Z4Y2;B4DVS7;Q96BA2;A0A024R4B2;O00506-3;O00506-2;O00506;C9JDH9;C9J6L2;C9JCC0;C9J232;H7C279;Q5CZ67;B4DMA5;Q9NWX4;B4DMR0;H0Y630;B4DR80;Q6P0Y1;Q5U0E6;B4DT57;Q9Y6E0-2;Q9Y6E0;Q96SR7;Q6FG81;C9JJV0;Q5JV98	Serine/threonine-protein kinase 25;Serine/threonine-protein kinase 24;Serine/threonine-protein kinase 24 36 kDa subunit;Serine/threonine-protein kinase 24 12 kDa subunit	STK25;DKFZp686J1430;STK24;HEL-S-95	tr|B4E185|B4E185_HUMAN cDNA FLJ61527, highly similar to Serine/threonine-protein kinase 25 OS=Homo sapiens OX=9606 PE=2 SV=1;tr|B3KRS6|B3KRS6_HUMAN cDNA FLJ34842 fis, clone NT2NE2011033, highly similar to Serine/threonine-protein kinase 25 OS=Homo sapiens	-0.94948	0.698754
1408	B5MCF9;B2RDF2;O00541-2;O00541;B3KXD6;B3KTZ6;Q6ZUE0	Pescadillo homolog	PES1	tr|B5MCF9|B5MCF9_HUMAN Pescadillo homolog OS=Homo sapiens OX=9606 GN=PES1 PE=1 SV=1;tr|B2RDF2|B2RDF2_HUMAN Pescadillo homolog OS=Homo sapiens OX=9606 GN=PES1 PE=2 SV=1;sp|O00541-2|PESC_HUMAN Isoform 2 of Pescadillo homolog OS=Homo sapiens OX=9606 GN=PES1;s	0.52792	1.01137
728	A0A0A0MS99;I3L4X2;P33527;P33527-9;Q68CP7;P33527-4;P33527-2;P33527-3;P33527-6;P33527-7;Q9UQ98;P33527-5;P33527-8;Q9BV39;G0ZCM6;G0ZCM4;G0ZCM5;G0ZCM3	Multidrug resistance-associated protein 1	ABCC1;DKFZp781G125;MRP	tr|A0A0A0MS99|A0A0A0MS99_HUMAN Multidrug resistance-associated protein 1 OS=Homo sapiens OX=9606 GN=ABCC1 PE=1 SV=1;tr|I3L4X2|I3L4X2_HUMAN Multidrug resistance-associated protein 1 (Fragment) OS=Homo sapiens OX=9606 GN=ABCC1 PE=1 SV=1;sp|P33527|MRP1_HUMAN	-1.36998	0.903762
259	B4DGN8;B2R5M9;A0A024R4H0;Q02809;Q02809-2;B4DHT1;Q5JXB8;Q5JXB7	Procollagen-lysine,2-oxoglutarate 5-dioxygenase 1	PLOD1	tr|B4DGN8|B4DGN8_HUMAN cDNA FLJ53377, highly similar to Procollagen-lysine, 2-oxoglutarate 5-dioxygenase 1 OS=Homo sapiens OX=9606 PE=2 SV=1;tr|B2R5M9|B2R5M9_HUMAN cDNA, FLJ92537, highly similar to Homo sapiens procollagen-lysine, 2-oxoglutarate 5-dioxygen	-0.264929	0.524943
3194	Q9BVA1;B2R6L0;Q13885;A0A024QZU2;O43209;Q9UGA2;A1L195;A5D907;A5D906;A1L196	Tubulin beta-2B chain;Tubulin beta-2A chain	TUBB2B;TUBB2A;DKFZp566F223	sp|Q9BVA1|TBB2B_HUMAN Tubulin beta-2B chain OS=Homo sapiens OX=9606 GN=TUBB2B PE=1 SV=1;tr|B2R6L0|B2R6L0_HUMAN Tubulin beta chain OS=Homo sapiens OX=9606 PE=2 SV=1;sp|Q13885|TBB2A_HUMAN Tubulin beta-2A chain OS=Homo sapiens OX=9606 GN=TUBB2A PE=1 SV=1;tr|A	-2.87575	1.5159
2457	P48059-2;P48059;P48059-4;P48059-5;P48059-3;A0A0J9YXC7;C9JF46;A0A0M3HER1;P0CW19-2;B4DUX2;Q7Z4I3;Q7Z4I4;Q7Z4I7-4;D3DX71;A0PJ44;H0Y592;Q9NWG2	LIM and senescent cell antigen-like-containing domain protein 1	LIMS1	sp|P48059-2|LIMS1_HUMAN Isoform 2 of LIM and senescent cell antigen-like-containing domain protein 1 OS=Homo sapiens OX=9606 GN=LIMS1;sp|P48059|LIMS1_HUMAN LIM and senescent cell antigen-like-containing domain protein 1 OS=Homo sapiens OX=9606 GN=LIMS1 PE=	-1.19697	1.40015
1714	B7Z855;B7ZAX6;Q93009-3;Q93009;B7Z7T5;H3BND8;Q6U8A4;F5H2X1;B7Z842	Ubiquitin carboxyl-terminal hydrolase;Ubiquitin carboxyl-terminal hydrolase 7	USP7	tr|B7Z855|B7Z855_HUMAN cDNA FLJ50427, highly similar to Ubiquitin carboxyl-terminal hydrolase 7 (EC3.1.2.15) OS=Homo sapiens OX=9606 PE=2 SV=1;tr|B7ZAX6|B7ZAX6_HUMAN cDNA, FLJ79340, highly similar to Ubiquitin carboxyl-terminal hydrolase 7 OS=Homo sapiens	-0.83723	1.17576
3278	Q9NRR4;A0A024RE13;Q9NRR4-2;Q9NRR4-4;Q9NRR4-3;Q59FF9;H7C5U6;H0YB67	Ribonuclease 3	DROSHA;RNASEN	sp|Q9NRR4|RNC_HUMAN Ribonuclease 3 OS=Homo sapiens OX=9606 GN=DROSHA PE=1 SV=2;tr|A0A024RE13|A0A024RE13_HUMAN Ribonuclease III, nuclear, isoform CRA_a OS=Homo sapiens OX=9606 GN=RNASEN PE=3 SV=1;sp|Q9NRR4-2|RNC_HUMAN Isoform 2 of Ribonuclease 3 OS=Homo sap	-5.58969	1.17665
3293	Q9NWH9;A0A024R5X3;A0A024R5U7;H7C3F4;Q9NWH9-3;H7BXE3;H0YMM0;H0YL55;H0YMW8;H0YNF3;H0YMR6;H0YLE6;H0YKH2;H0YKU6;H0YLW7	SAFB-like transcription modulator	SLTM	sp|Q9NWH9|SLTM_HUMAN SAFB-like transcription modulator OS=Homo sapiens OX=9606 GN=SLTM PE=1 SV=2;tr|A0A024R5X3|A0A024R5X3_HUMAN SAFB-like, transcription modulator, isoform CRA_b OS=Homo sapiens OX=9606 GN=SLTM PE=4 SV=1;tr|A0A024R5U7|A0A024R5U7_HUMAN SAFB-	-6.72786	0.94342
1095	A1KY36;P27658	Collagen alpha-1(VIII) chain;Vastatin	COL8A1	tr|A1KY36|A1KY36_HUMAN Cell proliferation-inducing protein 41 OS=Homo sapiens OX=9606 PE=2 SV=1;sp|P27658|CO8A1_HUMAN Collagen alpha-1(VIII) chain OS=Homo sapiens OX=9606 GN=COL8A1 PE=1 SV=2	0.0154415	0.54449
3048	Q8ND56-2;Q8ND56;Q8ND56-3;A0A140TA76;K7EMZ9;I3L4Q1;A0A0G2JQ95;A0A096LP11;A0A140TA66;A0A0C4DFV2;Q5TBQ1;Q5TBQ0;Q9BX40-2;Q9BX40	Protein LSM14 homolog A	LSM14A	sp|Q8ND56-2|LS14A_HUMAN Isoform 2 of Protein LSM14 homolog A OS=Homo sapiens OX=9606 GN=LSM14A;sp|Q8ND56|LS14A_HUMAN Protein LSM14 homolog A OS=Homo sapiens OX=9606 GN=LSM14A PE=1 SV=3;sp|Q8ND56-3|LS14A_HUMAN Isoform 3 of Protein LSM14 homolog A OS=Homo sa	-10.0443	2.99815
2422	P36383;Q5H9P2;K7ENT9;K7EQ14;K7EM78;K7ERH3	Gap junction gamma-1 protein	GJC1;DKFZp686P0738	sp|P36383|CXG1_HUMAN Gap junction gamma-1 protein OS=Homo sapiens OX=9606 GN=GJC1 PE=1 SV=2;tr|Q5H9P2|Q5H9P2_HUMAN Gap junction protein (Fragment) OS=Homo sapiens OX=9606 GN=GJC1 PE=1 SV=1	2.88176	0.690857
2750	Q53XR6;Q15796-2;Q15796;H3BVD1;Q59F45;A0A024R5Z3;A0A024RDR3;B7Z5N5;P84022-3;P84022-2;P84022;O15198-2;O15198;H0YMP2;H0YNV1;H0YL71;H0YKE2;H3BP09;H0YAK7;B7Z725;K7EJX0;Q6I9T1;Q68DB7;P84022-4;Q99717;Q15797	Mothers against decapentaplegic homolog;Mothers against decapentaplegic homolog 2;Mothers against decapentaplegic homolog 3;Mothers against decapentaplegic homolog 9	SMAD2;SMAD3;SMAD9	tr|Q53XR6|Q53XR6_HUMAN Mothers against decapentaplegic homolog OS=Homo sapiens OX=9606 GN=SMAD2 PE=2 SV=1;sp|Q15796-2|SMAD2_HUMAN Isoform Short of Mothers against decapentaplegic homolog 2 OS=Homo sapiens OX=9606 GN=SMAD2;sp|Q15796|SMAD2_HUMAN Mothers agai	-2.95182	0.768943
2443	P42224-2;P42224;J3KPM9;E7ENM1;E7EPD2;D2KFR9;Q67C41;E9PH66	Signal transducer and activator of transcription 1-alpha/beta;Signal transducer and activator of transcription	STAT1	sp|P42224-2|STAT1_HUMAN Isoform Beta of Signal transducer and activator of transcription 1-alpha/beta OS=Homo sapiens OX=9606 GN=STAT1;sp|P42224|STAT1_HUMAN Signal transducer and activator of transcription 1-alpha/beta OS=Homo sapiens OX=9606 GN=STAT1 PE=1	-1.08339	0.613175
995	A0A1W2PQ90;Q92878-3;Q92878;Q92878-2;E7EN38;Q32P42;A8K3I2;E7ESD9;H7C0V2;H7C0P8	DNA repair protein RAD50	RAD50	tr|A0A1W2PQ90|A0A1W2PQ90_HUMAN Uncharacterized protein OS=Homo sapiens OX=9606 PE=4 SV=2;sp|Q92878-3|RAD50_HUMAN Isoform 3 of DNA repair protein RAD50 OS=Homo sapiens OX=9606 GN=RAD50;sp|Q92878|RAD50_HUMAN DNA repair protein RAD50 OS=Homo sapiens OX=9606 G	-0.728469	0.750231
2070	K7EMK9;O43688;O43688-2;Q59EW5;A0A0J9YXA3;O43688-3;K7ENH4	Lipid phosphate phosphohydrolase 2	PPAP2C	tr|K7EMK9|K7EMK9_HUMAN Phospholipid phosphatase 2 (Fragment) OS=Homo sapiens OX=9606 GN=PLPP2 PE=1 SV=2;sp|O43688|PLPP2_HUMAN Phospholipid phosphatase 2 OS=Homo sapiens OX=9606 GN=PLPP2 PE=1 SV=1;sp|O43688-2|PLPP2_HUMAN Isoform 2 of Phospholipid phosphatas	19.5771	1.89389
3253	Q9HA77;B7Z7E6;H0YFF0;Q6AW83;F5H579;A0A087WWV1;H0YFV1;F5H623	Probable cysteine--tRNA ligase, mitochondrial	CARS2	sp|Q9HA77|SYCM_HUMAN Probable cysteine--tRNA ligase, mitochondrial OS=Homo sapiens OX=9606 GN=CARS2 PE=1 SV=1;tr|B7Z7E6|B7Z7E6_HUMAN cDNA FLJ58704, weakly similar to Cysteinyl-tRNA synthetase OS=Homo sapiens OX=9606 PE=2 SV=1	2.82832	0.696204
733	I0CE67;Q6I9R8;Q2TSB7;Q2XQU9;J3KNW4;A0A0A0MSG2;Q14192;Q53QP3;Q53T40;F8WDA8;U3KQT4;Q14192-2	Four and a half LIM domains protein 2	FHL2;AAG11	tr|I0CE67|I0CE67_HUMAN Four-and-a-half LIM domains 2 OS=Homo sapiens OX=9606 GN=FHL2 PE=2 SV=1;tr|Q6I9R8|Q6I9R8_HUMAN FHL2 protein OS=Homo sapiens OX=9606 GN=FHL2 PE=2 SV=1;tr|Q2TSB7|Q2TSB7_HUMAN Aging-associated gene 11 OS=Homo sapiens OX=9606 GN=AAG11 PE	-1.99922	0.743436
897	A0A0U4BW16			tr|A0A0U4BW16|A0A0U4BW16_HUMAN Non-muscle myosin heavy chain 9 OS=Homo sapiens OX=9606 GN=MYH9 PE=2 SV=1	0.0902039	0.311028
447	B3KWP3;A0A024R9D0;Q9H2D1;B4DUQ5;E5RGK5;E5RFL3;E5RGT9	Mitochondrial folate transporter/carrier	SLC25A32	tr|B3KWP3|B3KWP3_HUMAN cDNA FLJ43503 fis, clone PEBLM2006215, highly similar to Mitochondrial folate transporter/carrier OS=Homo sapiens OX=9606 PE=2 SV=1;tr|A0A024R9D0|A0A024R9D0_HUMAN Solute carrier family 25, member 32, isoform CRA_a OS=Homo sapiens OX=	18.5396	0.60206
1007	B5MDE0;A0A291FGD9;Q96AA3;C9JP01	Protein RFT1 homolog	RFT1	tr|B5MDE0|B5MDE0_HUMAN Protein RFT1 homolog OS=Homo sapiens OX=9606 GN=RFT1 PE=1 SV=1;tr|A0A291FGD9|A0A291FGD9_HUMAN Protein RFT1 homolog OS=Homo sapiens OX=9606 GN=RFT1 PE=2 SV=1;sp|Q96AA3|RFT1_HUMAN Protein RFT1 homolog OS=Homo sapiens OX=9606 GN=RFT1 PE	19.2219	0.439349
2177	O60518;B4DTX6;A0A096LPA6;A0A096LNS2;B4E340	Ran-binding protein 6	RANBP6	sp|O60518|RNBP6_HUMAN Ran-binding protein 6 OS=Homo sapiens OX=9606 GN=RANBP6 PE=1 SV=2;tr|B4DTX6|B4DTX6_HUMAN cDNA FLJ54311, highly similar to Ran-binding protein 6 OS=Homo sapiens OX=9606 PE=2 SV=1	-1.01796	1.00888
695	Q6IAW3;A0A090N7W4;Q00535;A0A0S2Z355;Q00535-2	Cyclin-dependent-like kinase 5	CDK5	tr|Q6IAW3|Q6IAW3_HUMAN CDK5 protein OS=Homo sapiens OX=9606 GN=CDK5 PE=2 SV=1;tr|A0A090N7W4|A0A090N7W4_HUMAN Cyclin-dependent kinase 5 OS=Homo sapiens OX=9606 GN=CDK5 PE=2 SV=1;sp|Q00535|CDK5_HUMAN Cyclin-dependent-like kinase 5 OS=Homo sapiens OX=9606 GN=	-0.88417	0.541119
698	A0A090N8Z2;A0A090N8H1;Q9BWE0;Q9BWE0-4;A8K9F5;C9JZE3;C9JYJ8;E7EVL6	Replication initiator 1	REPIN1	tr|A0A090N8Z2|A0A090N8Z2_HUMAN Replication initiator 1 OS=Homo sapiens OX=9606 GN=REPIN1 PE=4 SV=1;tr|A0A090N8H1|A0A090N8H1_HUMAN HCG1990708, isoform CRA_c OS=Homo sapiens OX=9606 GN=REPIN1 PE=4 SV=1;sp|Q9BWE0|REPI1_HUMAN Replication initiator 1 OS=Homo sa	-1.6702	0.749785
278	A0A024R566;Q15637-6;A0A024R5D9;Q15637-2;B4DJU4;A0A024R572;Q15637-3;Q15637;Q15637-7;Q14820;F8WEV5;C9J792	Splicing factor 1	SF1	tr|A0A024R566|A0A024R566_HUMAN Splicing factor 1, isoform CRA_a OS=Homo sapiens OX=9606 GN=SF1 PE=4 SV=1;sp|Q15637-6|SF01_HUMAN Isoform 6 of Splicing factor 1 OS=Homo sapiens OX=9606 GN=SF1;tr|A0A024R5D9|A0A024R5D9_HUMAN Splicing factor 1, isoform CRA_c OS	-5.85189	1.83697
1178	Q7Z3Z9;A8K139;P32004-3;P32004-2;P32004;Q86SE4;Q7Z2J8;Q7Z2I3;E9PHJ4;E7EMY4;E7EVM4;E7EPI4;H0Y5C3	Neural cell adhesion molecule L1	L1CAM	tr|Q7Z3Z9|Q7Z3Z9_HUMAN L1 cell adhesion molecule (Fragment) OS=Homo sapiens OX=9606 GN=L1CAM PE=2 SV=1;tr|A8K139|A8K139_HUMAN cDNA FLJ76744, highly similar to Homo sapiens L1 cell adhesion molecule (L1CAM), transcript variant 1, mRNA OS=Homo sapiens OX=960	19.7019	1.5814
3073	Q8TED0-3;Q8TED0;H0Y8P4;Q8TED0-2;D6RF65	U3 small nucleolar RNA-associated protein 15 homolog	UTP15	sp|Q8TED0-3|UTP15_HUMAN Isoform 3 of U3 small nucleolar RNA-associated protein 15 homolog OS=Homo sapiens OX=9606 GN=UTP15;sp|Q8TED0|UTP15_HUMAN U3 small nucleolar RNA-associated protein 15 homolog OS=Homo sapiens OX=9606 GN=UTP15 PE=1 SV=3;tr|H0Y8P4|H0Y8P	-0.110993	0.807664
1013	A0A2K4XGN4;U5TRL0;S5DTZ5;S5DN61;S5DN56;S5DN50;S5DLE7;S5DLE2;S5DI24;S5DI19;S5DI14;S5DHP3;S5DHP0;R4S840;N1NT51;G4V594;E1Y7F9;E1Y6M5;E0WN40;D9UC06;A0A2Z4LG72;A0A1C9ZYR6;A0A0G3EM65;Q29866;O19657;D9UAZ6;A0A1T4J2S9;Q9MY41;A0A1W2PR11;E0Z0E2;A0A060VHE3;V5NSW3;V5NSW0;V5NRD7;V5NRD2;V5NQX2;V5NQU7;V5NQU3;V5NQC9;F6IQM2;F6IQJ5;F6IQJ4;F6IQJ3;F6IQJ2;F6IQJ1;F6IQJ0;F6IQI8;F6IQI6;F6IQI4;F6IQI3;F6IQI1;F6IQI0;F6IQH9;…	HLA class I histocompatibility antigen, Cw-6 alpha chain;HLA class I histocompatibility antigen, Cw-18 alpha chain;HLA class I histocompatibility antigen, Cw-15 alpha chain;HLA class I histocompatibility antigen, Cw-1 alpha chain;Putative HLA class I histocompatibility antigen, alpha chain H	HLA-C;HLA-Cw;Cw;MHC;HLA-Cw*07;HLA;HLA-H	tr|A0A2K4XGN4|A0A2K4XGN4_HUMAN MHC class I antigen OS=Homo sapiens OX=9606 GN=HLA-C PE=3 SV=1;tr|U5TRL0|U5TRL0_HUMAN MHC class I antigen (Fragment) OS=Homo sapiens OX=9606 GN=HLA-C PE=3 SV=1;tr|S5DTZ5|S5DTZ5_HUMAN MHC class I antigen (Fragment) OS=Homo sap	18.5844	0.60206
451	A0A024R9G7;Q6PL18;A0A0B4J211;Q6PL18-2;Q9ULI0-2;Q9ULI0	ATPase family AAA domain-containing protein 2	ATAD2	tr|A0A024R9G7|A0A024R9G7_HUMAN ATPase family, AAA domain containing 2, isoform CRA_c OS=Homo sapiens OX=9606 GN=ATAD2 PE=4 SV=1;sp|Q6PL18|ATAD2_HUMAN ATPase family AAA domain-containing protein 2 OS=Homo sapiens OX=9606 GN=ATAD2 PE=1 SV=1	18.9279	0.7728
2717	Q15007;A8K489;A0A087X1R4;Q15007-2;Q9BZS4;Q6AHX7	Pre-mRNA-splicing regulator WTAP	WTAP	sp|Q15007|FL2D_HUMAN Pre-mRNA-splicing regulator WTAP OS=Homo sapiens OX=9606 GN=WTAP PE=1 SV=2;tr|A8K489|A8K489_HUMAN cDNA FLJ76151, highly similar to Homo sapiens Wilms tumor 1 associated protein (WTAP), transcript variant 1, mRNA OS=Homo sapiens OX=9606	-6.40498	1.23205
2360	Q3B7A7;Q59HH3;P22102;P22102-2;C9JBJ1;C9JTV6;F8WD69;Q15374;B4DJ93;O14660;Q71VH3;C9JZG2;C9JKQ7;H7C366;A0A140TA71	Trifunctional purine biosynthetic protein adenosine-3;Phosphoribosylamine--glycine ligase;Phosphoribosylformylglycinamidine cyclo-ligase;Phosphoribosylglycinamide formyltransferase	GART	tr|Q3B7A7|Q3B7A7_HUMAN Trifunctional purine biosynthetic protein adenosine-3 OS=Homo sapiens OX=9606 GN=GART PE=2 SV=1;tr|Q59HH3|Q59HH3_HUMAN Trifunctional purine biosynthetic protein adenosine-3 (Fragment) OS=Homo sapiens OX=9606 PE=2 SV=1;sp|P22102|PUR2_	0.491574	0.375816
2741	Q15554-4;Q15554;J3KSJ9;H3BTA7;U3KQ35;H3BR06;H3BR37	Telomeric repeat-binding factor 2	TERF2	sp|Q15554-4|TERF2_HUMAN Isoform 2 of Telomeric repeat-binding factor 2 OS=Homo sapiens OX=9606 GN=TERF2;sp|Q15554|TERF2_HUMAN Telomeric repeat-binding factor 2 OS=Homo sapiens OX=9606 GN=TERF2 PE=1 SV=3;tr|J3KSJ9|J3KSJ9_HUMAN Telomeric repeat-binding facto	19.504	1.66339
916	A0A140VJI5;Q9BVJ7	Dual specificity protein phosphatase 23	DUSP23	tr|A0A140VJI5|A0A140VJI5_HUMAN Dual specificity phosphatase 23 OS=Homo sapiens OX=9606 GN=DUSP23 PE=2 SV=1;sp|Q9BVJ7|DUS23_HUMAN Dual specificity protein phosphatase 23 OS=Homo sapiens OX=9606 GN=DUSP23 PE=1 SV=1	-0.299081	0.408883
874	A0A0S2Z5J4;O00203-3;O00203;A8K586;Q3MNE1;A0A0S2Z4Z4;B4E0B2;H0YBD0;F5GWU4;A0A2R8Y2A8;Q68CN5;Q13367-3;Q13367;Q13367-4	AP-3 complex subunit beta-1;AP-3 complex subunit beta	AP3B1	tr|A0A0S2Z5J4|A0A0S2Z5J4_HUMAN Adaptor-related protein complex 3 beta 1 subunit isoform 1 (Fragment) OS=Homo sapiens OX=9606 GN=AP3B1 PE=2 SV=1;sp|O00203-3|AP3B1_HUMAN Isoform 2 of AP-3 complex subunit beta-1 OS=Homo sapiens OX=9606 GN=AP3B1;sp|O00203|AP3B	-2.72705	1.76116
2636	Q08AF3;B4E0B1;B4E128;Q08AF3-2	Schlafen family member 5	SLFN5	sp|Q08AF3|SLFN5_HUMAN Schlafen family member 5 OS=Homo sapiens OX=9606 GN=SLFN5 PE=1 SV=1;tr|B4E0B1|B4E0B1_HUMAN cDNA FLJ52100 OS=Homo sapiens OX=9606 PE=2 SV=1	1.75389	0.443309
763	A0A0B4J1W3;Q9BXJ9;B2RBE5;Q58F05;B4E2T6;Q9BXJ9-4;A4FU51;Q6N069;Q9H6N3;Q8N352;Q6N069-5;Q6N069-4;Q6N069-3;Q6N069-2	N-alpha-acetyltransferase 15, NatA auxiliary subunit	NAA15;NARG1	tr|A0A0B4J1W3|A0A0B4J1W3_HUMAN N-alpha-acetyltransferase 15, NatA auxiliary subunit OS=Homo sapiens OX=9606 GN=NAA15 PE=1 SV=1;sp|Q9BXJ9|NAA15_HUMAN N-alpha-acetyltransferase 15, NatA auxiliary subunit OS=Homo sapiens OX=9606 GN=NAA15 PE=1 SV=1;tr|B2RBE5|B	19.7776	0.60979
2153	O43292;B2R6X8;O43292-2;E9PLV6;E9PPZ9;E9PM11;E9PLG8;E9PM94;E9PQ31;D3DWL1	Glycosylphosphatidylinositol anchor attachment 1 protein	GPAA1	sp|O43292|GPAA1_HUMAN Glycosylphosphatidylinositol anchor attachment 1 protein OS=Homo sapiens OX=9606 GN=GPAA1 PE=1 SV=3;tr|B2R6X8|B2R6X8_HUMAN cDNA, FLJ93169, highly similar to Homo sapiens GPAA1P anchor attachment protein 1 homolog (yeast) (GPAA1), mRNA	-1.30646	0.886129
86	A0A024R0E3;Q8TAA9-2;Q8TAA9	Vang-like protein 1	VANGL1	tr|A0A024R0E3|A0A024R0E3_HUMAN Vang-like protein OS=Homo sapiens OX=9606 GN=VANGL1 PE=3 SV=1;sp|Q8TAA9-2|VANG1_HUMAN Isoform 2 of Vang-like protein 1 OS=Homo sapiens OX=9606 GN=VANGL1;sp|Q8TAA9|VANG1_HUMAN Vang-like protein 1 OS=Homo sapiens OX=9606 GN=VAN	4.01727	0.710728
1429	B2RWN5;A0A024R3R7;Q9H583;Q5T3Q7;A2VDI1;B4E263;B3KWS1;B7ZAU8;Q8N7L7;Q96ES5;Q6P664	HEAT repeat-containing protein 1;HEAT repeat-containing protein 1, N-terminally processed	HEATR1	tr|B2RWN5|B2RWN5_HUMAN HEAT repeat containing 1 OS=Homo sapiens OX=9606 GN=HEATR1 PE=2 SV=1;tr|A0A024R3R7|A0A024R3R7_HUMAN HEAT repeat containing 1, isoform CRA_b OS=Homo sapiens OX=9606 GN=HEATR1 PE=4 SV=1;sp|Q9H583|HEAT1_HUMAN HEAT repeat-containing prot	0.396499	0.305067
1072	A0A2X0SFH4;A1L390;A0A0U1RR71;A1L390-3;G3V3I3;G3V278	Pleckstrin homology domain-containing family G member 3	PLEKHG3	tr|A0A2X0SFH4|A0A2X0SFH4_HUMAN PLEKHG3 (Fragment) OS=Homo sapiens OX=9606 GN=PLEKHG3 PE=4 SV=1;sp|A1L390|PKHG3_HUMAN Pleckstrin homology domain-containing family G member 3 OS=Homo sapiens OX=9606 GN=PLEKHG3 PE=1 SV=1;tr|A0A0U1RR71|A0A0U1RR71_HUMAN Pleckst	19.3669	1.18431
551	A0A024RC00;Q9NRF8	CTP synthase;CTP synthase 2	CTPS2	tr|A0A024RC00|A0A024RC00_HUMAN CTP synthase OS=Homo sapiens OX=9606 GN=CTPS2 PE=3 SV=1;sp|Q9NRF8|PYRG2_HUMAN CTP synthase 2 OS=Homo sapiens OX=9606 GN=CTPS2 PE=1 SV=1	0.534428	0.60206
888	A0A0S2Z6V5;Q8IYU8;A0A0S2Z6B0;A0A0A0MTD5	Calcium uptake protein 2, mitochondrial	MICU2	tr|A0A0S2Z6V5|A0A0S2Z6V5_HUMAN EF-hand domain family member A1 isoform 1 (Fragment) OS=Homo sapiens OX=9606 GN=EFHA1 PE=2 SV=1;sp|Q8IYU8|MICU2_HUMAN Calcium uptake protein 2, mitochondrial OS=Homo sapiens OX=9606 GN=MICU2 PE=1 SV=2	19.5148	1.52561
1236	A8K5Y7;Q9HAV4;B3KPQ5;B3KNC6;Q9H8N6;H0Y3W3;H0Y3Q8;E2QRM3;H0Y9I3	Exportin-5	XPO5	tr|A8K5Y7|A8K5Y7_HUMAN cDNA FLJ78655, highly similar to Homo sapiens exportin 5 (XPO5), mRNA OS=Homo sapiens OX=9606 PE=2 SV=1;sp|Q9HAV4|XPO5_HUMAN Exportin-5 OS=Homo sapiens OX=9606 GN=XPO5 PE=1 SV=1;tr|B3KPQ5|B3KPQ5_HUMAN cDNA FLJ32057 fis, clone NTONG20	0.822898	0.322403
1871	E7EVQ6;Q9UNR6;Q14534;B4DHX0;B4DX34;Q5HYI4;H0YBN7;E5RJH9	Squalene monooxygenase	SQLE;ERG1;DKFZp686B0215	tr|E7EVQ6|E7EVQ6_HUMAN Squalene monooxygenase OS=Homo sapiens OX=9606 GN=SQLE PE=1 SV=1;tr|Q9UNR6|Q9UNR6_HUMAN Squalene epoxidase OS=Homo sapiens OX=9606 GN=ERG1 PE=2 SV=1;sp|Q14534|ERG1_HUMAN Squalene monooxygenase OS=Homo sapiens OX=9606 GN=SQLE PE=1 SV=	1.40278	0.542694
921	A0A140VJN3;Q9H9A6	Leucine-rich repeat-containing protein 40	LRRC40	tr|A0A140VJN3|A0A140VJN3_HUMAN Leucine rich repeat containing 40 OS=Homo sapiens OX=9606 GN=LRRC40 PE=2 SV=1;sp|Q9H9A6|LRC40_HUMAN Leucine-rich repeat-containing protein 40 OS=Homo sapiens OX=9606 GN=LRRC40 PE=1 SV=1	-0.507763	0.593474
968	A0A1C3PH90;A0A1L2BM19			tr|A0A1C3PH90|A0A1C3PH90_HUMAN MHC class I antigen OS=Homo sapiens OX=9606 GN=HLA-A PE=3 SV=1	0.367685	0.558836
1358	B2R7C2;O43264;B4E1J7;O43264-2;B4DUQ3;F5H3C1	Centromere/kinetochore protein zw10 homolog	ZW10	tr|B2R7C2|B2R7C2_HUMAN cDNA, FLJ93375, highly similar to Homo sapiens ZW10, kinetochore associated, homolog (Drosophila) (ZW10), mRNA OS=Homo sapiens OX=9606 PE=2 SV=1;sp|O43264|ZW10_HUMAN Centromere/kinetochore protein zw10 homolog OS=Homo sapiens OX=9606	-0.906071	0.938845
3364	Q9UL63;F8WEY7;C9J7E8;B4DG30;Q9UL63-2;Q7Z3T0	Muskelin	MKLN1	sp|Q9UL63|MKLN1_HUMAN Muskelin OS=Homo sapiens OX=9606 GN=MKLN1 PE=1 SV=2;tr|F8WEY7|F8WEY7_HUMAN Muskelin OS=Homo sapiens OX=9606 GN=MKLN1 PE=1 SV=1;tr|C9J7E8|C9J7E8_HUMAN Muskelin OS=Homo sapiens OX=9606 GN=MKLN1 PE=1 SV=1;tr|B4DG30|B4DG30_HUMAN cDNA FLJ5	-0.643581	0.767468
1616	B4DTQ6;Q70J99;Q70J99-3;K7EMK8;K7EQ37;Q70J99-2;K7EIH3;K7EN81	Protein unc-13 homolog D	UNC13D	tr|B4DTQ6|B4DTQ6_HUMAN cDNA FLJ54883, highly similar to Unc-13 homolog D OS=Homo sapiens OX=9606 PE=2 SV=1;sp|Q70J99|UN13D_HUMAN Protein unc-13 homolog D OS=Homo sapiens OX=9606 GN=UNC13D PE=1 SV=1;sp|Q70J99-3|UN13D_HUMAN Isoform 3 of Protein unc-13 homolo	0.0415926	0.368631
1189	E9PB90;A8K2U2;P52789;Q68E10;Q53SG7;Q53QX9;Q09LL6	Hexokinase;Hexokinase-2	HK2;DKFZp686M1669	tr|E9PB90|E9PB90_HUMAN Hexokinase-2 OS=Homo sapiens OX=9606 GN=HK2 PE=1 SV=1;tr|A8K2U2|A8K2U2_HUMAN cDNA FLJ75392, highly similar to Homo sapiens hexokinase II (HKII) mRNA OS=Homo sapiens OX=9606 PE=2 SV=1;sp|P52789|HXK2_HUMAN Hexokinase-2 OS=Homo sapiens	19.4788	1.28666
3425	Q9Y6G9;Q6MZE7;B3KM42;E9PHI6;C9JGM7;C9JLW1;B4DDM4;Q63HJ8;B4E2E0;B4DHD8;A0A024R6Z0;O43237	Cytoplasmic dynein 1 light intermediate chain 1	DYNC1LI1;DKFZp686A1525	sp|Q9Y6G9|DC1L1_HUMAN Cytoplasmic dynein 1 light intermediate chain 1 OS=Homo sapiens OX=9606 GN=DYNC1LI1 PE=1 SV=3;tr|Q6MZE7|Q6MZE7_HUMAN Uncharacterized protein DKFZp686A1525 (Fragment) OS=Homo sapiens OX=9606 GN=DKFZp686A1525 PE=2 SV=1;tr|B3KM42|B3KM42_	-1.33745	0.689089
64	Q6IBN4;Q53HG3;Q53GC8;A0A0C4DGA2;A0A024QZU5;O75521-2;O75521;F8WAW4;F8W6J1;Q9NYD2;B4DLL3;F1LLU7;C9JB63;Q59E94	Enoyl-CoA delta isomerase 2, mitochondrial	PECI;ECI2;HCA64	tr|Q6IBN4|Q6IBN4_HUMAN PECI protein OS=Homo sapiens OX=9606 GN=PECI PE=2 SV=1;tr|Q53HG3|Q53HG3_HUMAN Peroxisomal D3,D2-enoyl-CoA isomerase isoform 1 variant (Fragment) OS=Homo sapiens OX=9606 PE=2 SV=1;tr|Q53GC8|Q53GC8_HUMAN Peroxisomal D3,D2-enoyl-CoA iso	19.7059	2.81118
1730	B7ZM10;Q96QU8;H3BRV5;H3BMW9;H3BPG8;I3L2K0	Exportin-6	XPO6	tr|B7ZM10|B7ZM10_HUMAN XPO6 protein OS=Homo sapiens OX=9606 GN=XPO6 PE=2 SV=1;sp|Q96QU8|XPO6_HUMAN Exportin-6 OS=Homo sapiens OX=9606 GN=XPO6 PE=1 SV=1	-0.105858	0.366155
3255	Q9HAV0;A8K3F6;B4DLV5	Guanine nucleotide-binding protein subunit beta-4	GNB4	sp|Q9HAV0|GBB4_HUMAN Guanine nucleotide-binding protein subunit beta-4 OS=Homo sapiens OX=9606 GN=GNB4 PE=1 SV=3;tr|A8K3F6|A8K3F6_HUMAN cDNA FLJ77654, highly similar to Homo sapiens guanine nucleotide binding protein (G protein), beta polypeptide 4 (GNB4),	18.7069	0.60206
3263	Q9NNW5;A0A087X295;E9PDU5;B4E256;E9PBK6;B4DLP3;Q8NDH0;B3KRR8;Q9NW86;C9K020;B4DK45;Q6AZD6;Q9H9M3;Q6PKC6;E5RFX3;F8WE36;V9GZ65;C9JFP6;V9GYU1	WD repeat-containing protein 6	WDR6;DKFZp434F1720	sp|Q9NNW5|WDR6_HUMAN WD repeat-containing protein 6 OS=Homo sapiens OX=9606 GN=WDR6 PE=1 SV=1;tr|A0A087X295|A0A087X295_HUMAN WD repeat-containing protein 6 OS=Homo sapiens OX=9606 GN=WDR6 PE=1 SV=1;tr|E9PDU5|E9PDU5_HUMAN WD repeat-containing protein 6 OS=H	0.0629333	1.08466
2707	Q14643-4;Q14643-3;Q14643-8;Q14643-7;Q14643-5;Q14643-6;Q14643-2;Q14643;A0A024R2E1;A0A024R2I2;B4DER3;Q59H91;B7ZMI3;Q14571;B4DGH1	Inositol 1,4,5-trisphosphate receptor type 1	ITPR1	sp|Q14643-4|ITPR1_HUMAN Isoform 4 of Inositol 1,4,5-trisphosphate receptor type 1 OS=Homo sapiens OX=9606 GN=ITPR1;sp|Q14643-3|ITPR1_HUMAN Isoform 3 of Inositol 1,4,5-trisphosphate receptor type 1 OS=Homo sapiens OX=9606 GN=ITPR1;sp|Q14643-8|ITPR1_HUMAN Is	-2.50286	0.620473
879	B3KNE7;B3KQF0;A0A0S2Z5M1;Q9UGP8;B3KWU4	Translocation protein SEC63 homolog	SEC63	tr|B3KNE7|B3KNE7_HUMAN cDNA FLJ14468 fis, clone MAMMA1000734, highly similar to Translocation protein SEC63 homolog OS=Homo sapiens OX=9606 PE=2 SV=1;tr|B3KQF0|B3KQF0_HUMAN cDNA FLJ90354 fis, clone NT2RP2003390, highly similar to Translocation protein SEC6	20.0046	1.2708
2819	Q58EY4;Q92922;B4DYQ1;Q05BW5;Q05CR1;B4DYF9;F8WE13	SWI/SNF complex subunit SMARCC1	SMARCC1	tr|Q58EY4|Q58EY4_HUMAN SWI/SNF related, matrix associated, actin dependent regulator of chromatin, subfamily c, member 1 OS=Homo sapiens OX=9606 GN=SMARCC1 PE=2 SV=1;sp|Q92922|SMRC1_HUMAN SWI/SNF complex subunit SMARCC1 OS=Homo sapiens OX=9606 GN=SMARCC1 P	-1.30263	1.10015
3318	Q9P0K7-3;Q9P0K7;Q9P0K7-2;Q9P0K7-4;B4DNL3;B3KMZ9;D6RE17;D6REL2;D6R9G6;D6RF74;D6RB25;D6RBW6;D6RB27;D6R9G4;D6RBY4	Ankycorbin	RAI14	sp|Q9P0K7-3|RAI14_HUMAN Isoform 3 of Ankycorbin OS=Homo sapiens OX=9606 GN=RAI14;sp|Q9P0K7|RAI14_HUMAN Ankycorbin OS=Homo sapiens OX=9606 GN=RAI14 PE=1 SV=2;sp|Q9P0K7-2|RAI14_HUMAN Isoform 2 of Ankycorbin OS=Homo sapiens OX=9606 GN=RAI14;sp|Q9P0K7-4|RAI14_	-3.91837	1.58373
2716	Q14966;Q14966-3;A8K583;D6W5H1;Q14966-4;Q14966-5;Q14966-2;Q14966-6;B4DF54;B4E187;Q57Z90;Q6ZQV0;C9JWN0;A0A096LPK8;A0A096LNS4;A0A096LPI0;A0A096LNR2;A0A096LNX0;A0A096LNQ0;A0A096LPB4	Zinc finger protein 638	ZNF638	sp|Q14966|ZN638_HUMAN Zinc finger protein 638 OS=Homo sapiens OX=9606 GN=ZNF638 PE=1 SV=2;sp|Q14966-3|ZN638_HUMAN Isoform 3 of Zinc finger protein 638 OS=Homo sapiens OX=9606 GN=ZNF638;tr|A8K583|A8K583_HUMAN cDNA FLJ77126, highly similar to Homo sapiens zi	-5.09023	1.53003
272	A0A024R4Z6;Q08945;E9PMD4;A0A2P9AU67;Q59GH7	FACT complex subunit SSRP1	SSRP1	tr|A0A024R4Z6|A0A024R4Z6_HUMAN FACT complex subunit SSRP1 OS=Homo sapiens OX=9606 GN=SSRP1 PE=3 SV=1;sp|Q08945|SSRP1_HUMAN FACT complex subunit SSRP1 OS=Homo sapiens OX=9606 GN=SSRP1 PE=1 SV=1	1.95953	0.782411
2470	P49643;A8K7A0;A0A024RD63;I0CMJ8;A0A024RD43;P49643-2	DNA primase large subunit	PRIM2;PRIM2A	sp|P49643|PRI2_HUMAN DNA primase large subunit OS=Homo sapiens OX=9606 GN=PRIM2 PE=1 SV=2;tr|A8K7A0|A8K7A0_HUMAN DNA primase large subunit OS=Homo sapiens OX=9606 PE=2 SV=1;tr|A0A024RD63|A0A024RD63_HUMAN Primase, polypeptide 2A, 58kDa, isoform CRA_a (Fragm	2.10877	0.678294
1077	A0A2X0TVY0;C9JME2;Q9Y4F1;Q9Y4F1-2;A0A1B0GV68;M0QYB0;H0Y783;M0QXT1;Q9Y4F1-3;M0R262	FERM, RhoGEF and pleckstrin domain-containing protein 1	FARP1	tr|A0A2X0TVY0|A0A2X0TVY0_HUMAN FARP1 (Fragment) OS=Homo sapiens OX=9606 GN=FARP1 PE=4 SV=1;tr|C9JME2|C9JME2_HUMAN FERM, ARHGEF and pleckstrin domain-containing protein 1 OS=Homo sapiens OX=9606 GN=FARP1 PE=1 SV=2;sp|Q9Y4F1|FARP1_HUMAN FERM, ARHGEF and plec	0.183668	0.589063
2139	O15397;O15397-2;Q59F59;F5H244;F5H2I3;A0A087WXH2;F5GXT5;H0YH64	Importin-8	IPO8	sp|O15397|IPO8_HUMAN Importin-8 OS=Homo sapiens OX=9606 GN=IPO8 PE=1 SV=2;sp|O15397-2|IPO8_HUMAN Isoform 2 of Importin-8 OS=Homo sapiens OX=9606 GN=IPO8	-1.02736	0.957997
2685	Q13637;B2R5I8;Q6FGU7;Q53EX5;B2R7I9;A0A024R191;Q7Z4W7;O14966;P57729	Ras-related protein Rab-32	RAB32	sp|Q13637|RAB32_HUMAN Ras-related protein Rab-32 OS=Homo sapiens OX=9606 GN=RAB32 PE=1 SV=3;tr|B2R5I8|B2R5I8_HUMAN cDNA, FLJ92490, highly similar to Homo sapiens RAB32, member RAS oncogene family (RAB32), mRNA OS=Homo sapiens OX=9606 PE=2 SV=1	20.651	0.378022
2167	O60287	Nucleolar pre-ribosomal-associated protein 1	URB1	sp|O60287|NPA1P_HUMAN Nucleolar pre-ribosomal-associated protein 1 OS=Homo sapiens OX=9606 GN=URB1 PE=1 SV=4	5.21273	0.780832
2205	O75691;B4DN27	Small subunit processome component 20 homolog	UTP20	sp|O75691|UTP20_HUMAN Small subunit processome component 20 homolog OS=Homo sapiens OX=9606 GN=UTP20 PE=1 SV=3	3.00797	0.580258
1177	E5RFQ1;B4E2U8;A8K0Z7;I6MBV4;Q9UH73;B4E172;Q658Y5;Q9H4W6-2;Q9UH73-2;Q9H4W6;A0A087WTE5;Q9HAK2-2	Receptor protein-tyrosine kinase;Transcription factor COE1;Transcription factor COE3	EBF1;DKFZp667I0324;EBF3	tr|E5RFQ1|E5RFQ1_HUMAN Transcription factor COE1 OS=Homo sapiens OX=9606 GN=EBF1 PE=1 SV=1;tr|B4E2U8|B4E2U8_HUMAN cDNA FLJ54478, highly similar to Transcription factor COE1 OS=Homo sapiens OX=9606 PE=2 SV=1;tr|A8K0Z7|A8K0Z7_HUMAN cDNA FLJ75048, highly simi	20.7167	0.84988
1951	G3V1A9;P42695;E9PKK4;E9PLE0;Q96FA6	Condensin-2 complex subunit D3	NCAPD3	tr|G3V1A9|G3V1A9_HUMAN Condensin-2 complex subunit D3 OS=Homo sapiens OX=9606 GN=NCAPD3 PE=1 SV=1;sp|P42695|CNDD3_HUMAN Condensin-2 complex subunit D3 OS=Homo sapiens OX=9606 GN=NCAPD3 PE=1 SV=2;tr|E9PKK4|E9PKK4_HUMAN Condensin-2 complex subunit D3 OS=Homo	1.43438	1.39319
1091	A0PJW6	Transmembrane protein 223	TMEM223	sp|A0PJW6|TM223_HUMAN Transmembrane protein 223 OS=Homo sapiens OX=9606 GN=TMEM223 PE=1 SV=1	18.7919	0.60206
847	A0A2R8YD50;B2R659;A0A0S2Z4J1;P51659;E7ER27;B4DDM5;E7EWE5;B4DSD0;P51659-3;P51659-2;A0A2R8YDT8;A0A2R8YF45;A0A2R8Y7L2;G5E9S2;B3KSP2;E7ET17;B4DI68;A0A0S2Z4Q6;Q59H27;A0A2R8YEG2;A0A2R8Y7W2;A0A0S2Z460;E7EPL9	Peroxisomal multifunctional enzyme type 2;(3R)-hydroxyacyl-CoA dehydrogenase;Enoyl-CoA hydratase 2	HSD17B4	tr|A0A2R8YD50|A0A2R8YD50_HUMAN Peroxisomal multifunctional enzyme type 2 OS=Homo sapiens OX=9606 GN=HSD17B4 PE=1 SV=1;tr|B2R659|B2R659_HUMAN cDNA, FLJ92803, highly similar to Homo sapiens hydroxysteroid (17-beta) dehydrogenase 4 (HSD17B4), mRNA OS=Homo sap	19.0393	0.718619
1503	B3KY51;Q8NC60	Nitric oxide-associated protein 1	NOA1	tr|B3KY51|B3KY51_HUMAN cDNA FLJ46863 fis, clone UTERU3011558 OS=Homo sapiens OX=9606 PE=2 SV=1;sp|Q8NC60|NOA1_HUMAN Nitric oxide-associated protein 1 OS=Homo sapiens OX=9606 GN=NOA1 PE=1 SV=2	18.7954	0.60206
2183	O60832;O60832-2;H7C0M1;C9IYT0;U5UA77;U5U7S7;H7C2Q9;H7BZF2;H7C2Q2	H/ACA ribonucleoprotein complex subunit 4	DKC1	sp|O60832|DKC1_HUMAN H/ACA ribonucleoprotein complex subunit DKC1 OS=Homo sapiens OX=9606 GN=DKC1 PE=1 SV=3;sp|O60832-2|DKC1_HUMAN Isoform 3 of H/ACA ribonucleoprotein complex subunit DKC1 OS=Homo sapiens OX=9606 GN=DKC1;tr|H7C0M1|H7C0M1_HUMAN H/ACA ribonu	-1.50862	0.949162
2884	Q68E01-2;Q68E01;Q68E01-3;Q68E01-4;A0A096LNW8	Integrator complex subunit 3	INTS3	sp|Q68E01-2|INT3_HUMAN Isoform 2 of Integrator complex subunit 3 OS=Homo sapiens OX=9606 GN=INTS3;sp|Q68E01|INT3_HUMAN Integrator complex subunit 3 OS=Homo sapiens OX=9606 GN=INTS3 PE=1 SV=1;sp|Q68E01-3|INT3_HUMAN Isoform 3 of Integrator complex subunit 3	0.0470964	0.5204
1983	H3BMF4;Q9H2V7-3;Q9H2V7-2;Q9H2V7;A0A024QZ93;Q9H2V7-4;H3BPT8;Q59FQ8;H3BR82;H3BT44;H3BPQ9;Q9H2V7-5	Protein spinster homolog 1	SPNS1;SPIN1	tr|H3BMF4|H3BMF4_HUMAN Protein spinster homolog 1 OS=Homo sapiens OX=9606 GN=SPNS1 PE=1 SV=1;sp|Q9H2V7-3|SPNS1_HUMAN Isoform 3 of Protein spinster homolog 1 OS=Homo sapiens OX=9606 GN=SPNS1;sp|Q9H2V7-2|SPNS1_HUMAN Isoform 2 of Protein spinster homolog 1 OS	18.8041	0.33449
1643	B4DYP7;Q96CW5-2;Q96CW5;A0A087WU06;Q96CW5-3	Gamma-tubulin complex component 3	TUBGCP3	tr|B4DYP7|B4DYP7_HUMAN Gamma-tubulin complex component OS=Homo sapiens OX=9606 PE=2 SV=1;sp|Q96CW5-2|GCP3_HUMAN Isoform 2 of Gamma-tubulin complex component 3 OS=Homo sapiens OX=9606 GN=TUBGCP3;sp|Q96CW5|GCP3_HUMAN Gamma-tubulin complex component 3 OS=Homo	1.48707	1.07762
1854	E5KTM5;Q8WVM0;A8K0B9	Dimethyladenosine transferase 1, mitochondrial	TFB1M	tr|E5KTM5|E5KTM5_HUMAN rRNA adenine N(6)-methyltransferase OS=Homo sapiens OX=9606 GN=TFB1M PE=3 SV=1;sp|Q8WVM0|TFB1M_HUMAN Dimethyladenosine transferase 1, mitochondrial OS=Homo sapiens OX=9606 GN=TFB1M PE=1 SV=1;tr|A8K0B9|A8K0B9_HUMAN rRNA adenine N(6)-m	20.73	0.943868
2708	Q14669-4;Q14669;Q14669-2;Q14669-3;H7C2Y1	E3 ubiquitin-protein ligase TRIP12	TRIP12	sp|Q14669-4|TRIPC_HUMAN Isoform 4 of E3 ubiquitin-protein ligase TRIP12 OS=Homo sapiens OX=9606 GN=TRIP12;sp|Q14669|TRIPC_HUMAN E3 ubiquitin-protein ligase TRIP12 OS=Homo sapiens OX=9606 GN=TRIP12 PE=1 SV=1;sp|Q14669-2|TRIPC_HUMAN Isoform 2 of E3 ubiquitin	1.20196	1.14835
2349	P18583-6	Protein SON	SON	sp|P18583-6|SON_HUMAN Isoform E of Protein SON OS=Homo sapiens OX=9606 GN=SON	19.6971	1.52001
1597	B4DPY2;H7C2N3;F8VU11;Q6NWY9-2;Q6NWY9-3;Q6NWY9			tr|B4DPY2|B4DPY2_HUMAN cDNA FLJ59286, highly similar to Pre-mRNA-processing factor 40 homolog A (Fragment) OS=Homo sapiens OX=9606 PE=2 SV=1	19.5513	1.17339
455	A8K9B9;A0A024R9N6;Q9H223	EH domain-containing protein 4	EHD4	tr|A8K9B9|A8K9B9_HUMAN cDNA FLJ77391, highly similar to Homo sapiens EH-domain containing 4 (EHD4), mRNA OS=Homo sapiens OX=9606 PE=2 SV=1;tr|A0A024R9N6|A0A024R9N6_HUMAN EH-domain containing 4, isoform CRA_a OS=Homo sapiens OX=9606 GN=EHD4 PE=3 SV=1;sp|Q9H	-0.488526	0.41783
2867	Q5TDH0;Q5TDH0-3;H0YII4;H0YI90;Q5TDH0-2	Protein DDI1 homolog 2	DDI2	sp|Q5TDH0|DDI2_HUMAN Protein DDI1 homolog 2 OS=Homo sapiens OX=9606 GN=DDI2 PE=1 SV=1;sp|Q5TDH0-3|DDI2_HUMAN Isoform 3 of Protein DDI1 homolog 2 OS=Homo sapiens OX=9606 GN=DDI2;tr|H0YII4|H0YII4_HUMAN Protein DDI1 homolog 2 (Fragment) OS=Homo sapiens OX=960	0.710495	0.538505
1419	B2RDV7;Q96G46;Q96G46-3;D6W636;O95323;Q96G46-2;K7EM42;K7EMI3;K7ER20;K7EQU9	tRNA-dihydrouridine(47) synthase [NAD(P)(+)];tRNA-dihydrouridine(47) synthase [NAD(P)(+)]-like	DUS3L	tr|B2RDV7|B2RDV7_HUMAN tRNA-dihydrouridine(47) synthase [NAD(P)(+)] OS=Homo sapiens OX=9606 PE=2 SV=1;sp|Q96G46|DUS3L_HUMAN tRNA-dihydrouridine(47) synthase [NAD(P)(+)]-like OS=Homo sapiens OX=9606 GN=DUS3L PE=1 SV=2;sp|Q96G46-3|DUS3L_HUMAN Isoform 3 of tR	19.1938	0.778339
974	A0A1S5UZ07;Q9Y490;H0YMT1;A0A1B0GVU7;G1UI21;Q9Y4G6	Talin-1	TLN1	tr|A0A1S5UZ07|A0A1S5UZ07_HUMAN Talin-1 OS=Homo sapiens OX=9606 GN=TLN1 PE=2 SV=1;sp|Q9Y490|TLN1_HUMAN Talin-1 OS=Homo sapiens OX=9606 GN=TLN1 PE=1 SV=3	0.570051	1.1313
27	D6RFM5;A0A024QZ30;P31040-2;P31040;B3KT34;A0A087X1I3;Q0QF12;B4DYN5;P31040-3;H0Y8X1;B3KYA5;B7Z6J5	Succinate dehydrogenase [ubiquinone] flavoprotein subunit, mitochondrial	SDHA	tr|D6RFM5|D6RFM5_HUMAN Succinate dehydrogenase [ubiquinone] flavoprotein subunit, mitochondrial OS=Homo sapiens OX=9606 GN=SDHA PE=1 SV=1;tr|A0A024QZ30|A0A024QZ30_HUMAN Succinate dehydrogenase [ubiquinone] flavoprotein subunit, mitochondrial OS=Homo sapien	19.6756	0.896956
1309	A8QI98;Q9Y2L1;Q49AG4;G3V1J5;Q9Y2L1-2;F2Z2C0;A0A024R643;B3KM83	Exosome complex exonuclease RRP44	DIS3;KIAA1008	tr|A8QI98|A8QI98_HUMAN DIS3 OS=Homo sapiens OX=9606 PE=2 SV=1;sp|Q9Y2L1|RRP44_HUMAN Exosome complex exonuclease RRP44 OS=Homo sapiens OX=9606 GN=DIS3 PE=1 SV=2;tr|Q49AG4|Q49AG4_HUMAN DIS3 protein OS=Homo sapiens OX=9606 GN=DIS3 PE=2 SV=1;tr|G3V1J5|G3V1J5_H	-1.39717	1.1457
453	A8K6F0;A0A024R9L1;O60306;B0AZM4;H0YH15;H0YLN9	Intron-binding protein aquarius	AQR	tr|A8K6F0|A8K6F0_HUMAN RNA helicase aquarius OS=Homo sapiens OX=9606 PE=2 SV=1;tr|A0A024R9L1|A0A024R9L1_HUMAN RNA helicase aquarius OS=Homo sapiens OX=9606 GN=AQR PE=3 SV=1;sp|O60306|AQR_HUMAN RNA helicase aquarius OS=Homo sapiens OX=9606 GN=AQR PE=1 SV=4;	1.43631	0.411613
3244	Q9H7D7-2;Q9H7D7;B4DRF0;C9JCS7;H0Y9R3	WD repeat-containing protein 26	WDR26	sp|Q9H7D7-2|WDR26_HUMAN Isoform 2 of WD repeat-containing protein 26 OS=Homo sapiens OX=9606 GN=WDR26;sp|Q9H7D7|WDR26_HUMAN WD repeat-containing protein 26 OS=Homo sapiens OX=9606 GN=WDR26 PE=1 SV=3;tr|B4DRF0|B4DRF0_HUMAN cDNA FLJ56418, highly similar to W	0.928904	0.548386
1802	D2JYH4;P62736;P63267;B3KW67;B4DUI8;Q13707;C9JFL5;F6UVQ4;F6QUT6;B7Z6I1;Q562S2	Actin, aortic smooth muscle;Actin, gamma-enteric smooth muscle	ACTA2;ACTG2	tr|D2JYH4|D2JYH4_HUMAN Actin, alpha 2, smooth muscle, aorta OS=Homo sapiens OX=9606 GN=ACTA2 PE=3 SV=1;sp|P62736|ACTA_HUMAN Actin, aortic smooth muscle OS=Homo sapiens OX=9606 GN=ACTA2 PE=1 SV=1;sp|P63267|ACTH_HUMAN Actin, gamma-enteric smooth muscle OS=Ho	20.3657	0.67631
2844	Q5LJA5;Q5LJA9;Q9Y5K5-2;Q9Y5K5-4;Q9Y5K5-3;Q9Y5K5;Q5LJB0;B2RB07;B4DW59;B7Z9U9;H0Y6Y4;H0Y4E0;H0Y4K0;B4DKB3;H0Y636	Ubiquitin carboxyl-terminal hydrolase;Ubiquitin carboxyl-terminal hydrolase isozyme L5	UCHL5	tr|Q5LJA5|Q5LJA5_HUMAN Ubiquitin carboxyl-terminal hydrolase OS=Homo sapiens OX=9606 GN=UCHL5 PE=1 SV=1;tr|Q5LJA9|Q5LJA9_HUMAN Ubiquitin carboxyl-terminal hydrolase (Fragment) OS=Homo sapiens OX=9606 GN=UCHL5 PE=1 SV=1;sp|Q9Y5K5-2|UCHL5_HUMAN Isoform 2 of	0.675201	0.336094
427	Q9H9C5;E9PEW0;A0A075B784;A0A024R8V6;Q9P275;K7EMM6;K7ELR5;Q8IXW9;B3KMW2	Ubiquitin carboxyl-terminal hydrolase;Ubiquitin carboxyl-terminal hydrolase 36	DUB1;USP36	tr|Q9H9C5|Q9H9C5_HUMAN Deubiquitinating enzyme 1 OS=Homo sapiens OX=9606 GN=DUB1 PE=2 SV=1;tr|E9PEW0|E9PEW0_HUMAN Ubiquitin carboxyl-terminal hydrolase 36 OS=Homo sapiens OX=9606 GN=USP36 PE=1 SV=2;tr|A0A075B784|A0A075B784_HUMAN Ubiquitin carboxyl-terminal	18.8779	0.60206
2291	P08243-2;P08243;B4DY32;P08243-3;F8WEJ5;C9JT45;C9J057;C9JLN6;C9JM09	Asparagine synthetase [glutamine-hydrolyzing]	ASNS	sp|P08243-2|ASNS_HUMAN Isoform 2 of Asparagine synthetase [glutamine-hydrolyzing] OS=Homo sapiens OX=9606 GN=ASNS;sp|P08243|ASNS_HUMAN Asparagine synthetase [glutamine-hydrolyzing] OS=Homo sapiens OX=9606 GN=ASNS PE=1 SV=4;tr|B4DY32|B4DY32_HUMAN cDNA FLJ51	0.284766	1.04378
1550	B4DIT7;V9HWG3;P21980;B4DTN7;Q6DKH2;P21980-2	Protein-glutamine gamma-glutamyltransferase 2	HEL-S-45;TGM2	tr|B4DIT7|B4DIT7_HUMAN cDNA FLJ58187, highly similar to Protein-glutamine gamma-glutamyltransferase 2 OS=Homo sapiens OX=9606 PE=2 SV=1;tr|V9HWG3|V9HWG3_HUMAN Epididymis secretory protein Li 45 OS=Homo sapiens OX=9606 GN=HEL-S-45 PE=2 SV=1;sp|P21980|TGM2_H	19.8973	5.78787
1917	F5GZS6;J3KPF3;P08195-3;P08195;P08195-4;H0YFS2;F5GZI0;H0YFX4	4F2 cell-surface antigen heavy chain	SLC3A2	tr|F5GZS6|F5GZS6_HUMAN 4F2 cell-surface antigen heavy chain OS=Homo sapiens OX=9606 GN=SLC3A2 PE=1 SV=1;tr|J3KPF3|J3KPF3_HUMAN 4F2 cell-surface antigen heavy chain OS=Homo sapiens OX=9606 GN=SLC3A2 PE=1 SV=1;sp|P08195-3|4F2_HUMAN Isoform 3 of 4F2 cell-surf	-0.889042	0.852977
805	A0A0G2JNW7;Q9Y666;A0A0U1RR18;A0A0G2JQE3;H0YB78;B4DZD0;Q9Y666-2	Solute carrier family 12 member 7	SLC12A7	tr|A0A0G2JNW7|A0A0G2JNW7_HUMAN Solute carrier family 12 member 7 OS=Homo sapiens OX=9606 GN=SLC12A7 PE=1 SV=1;sp|Q9Y666|S12A7_HUMAN Solute carrier family 12 member 7 OS=Homo sapiens OX=9606 GN=SLC12A7 PE=1 SV=3;tr|A0A0U1RR18|A0A0U1RR18_HUMAN Solute carrier	-0.589159	0.444274
2389	P27348;B4DMT8;B4DY04;Q53S41;E9PG15;Q53RR5	14-3-3 protein theta	YWHAQ	sp|P27348|1433T_HUMAN 14-3-3 protein theta OS=Homo sapiens OX=9606 GN=YWHAQ PE=1 SV=1;tr|B4DMT8|B4DMT8_HUMAN cDNA FLJ52118, highly similar to 14-3-3 protein theta OS=Homo sapiens OX=9606 PE=2 SV=1;tr|B4DY04|B4DY04_HUMAN cDNA FLJ51144, highly similar to 14-	2.83454	0.742817
611	A0A024RDY9;B1ALK7;B7Z6G2;A0A2R8YG42;Q14155-1;Q14155-5;E9PDQ5;A0A2X0SF98;Q14155-6;Q14155-2;Q14155-3;Q14155;B7Z344;F6SJA5;Q8N4Q3;E7EUY6;B7Z3C7;Q5W9H1;A0A2X0SSH0;Q15052-2;Q15052	Rho guanine nucleotide exchange factor 7	ARHGEF7	tr|A0A024RDY9|A0A024RDY9_HUMAN Rho guanine nucleotide exchange factor (GEF) 7, isoform CRA_b OS=Homo sapiens OX=9606 GN=ARHGEF7 PE=4 SV=1;tr|B1ALK7|B1ALK7_HUMAN Rho guanine nucleotide exchange factor 7 OS=Homo sapiens OX=9606 GN=ARHGEF7 PE=1 SV=1;tr|B7Z6G2	2.17034	0.702444
3199	Q9BW92;U3KQG0;Q9BW92-2;Q6ST48;F6S7Q7;Q9H045;Q5T5E9;U3KQ50;B4DQF3	Threonine--tRNA ligase, mitochondrial	TARS2	sp|Q9BW92|SYTM_HUMAN Threonine--tRNA ligase, mitochondrial OS=Homo sapiens OX=9606 GN=TARS2 PE=1 SV=1;tr|U3KQG0|U3KQG0_HUMAN Threonine--tRNA ligase, mitochondrial OS=Homo sapiens OX=9606 GN=TARS2 PE=1 SV=1;sp|Q9BW92-2|SYTM_HUMAN Isoform 2 of Threonine--tRN	18.9161	0.60206
1459	B3KPA6;B4DEA8;P49748-2;P49748;P49748-3;Q53HR2;K7EQP4;B3KPX1;J3QKU9;B4DYY0;G3V1M7;A0A077H1I5;K7EJW8;J3KSR4	Very long-chain specific acyl-CoA dehydrogenase, mitochondrial	ACADVL	tr|B3KPA6|B3KPA6_HUMAN Acyl-Coenzyme A dehydrogenase, very long chain, isoform CRA_e OS=Homo sapiens OX=9606 GN=ACADVL PE=2 SV=1;tr|B4DEA8|B4DEA8_HUMAN cDNA FLJ56425, highly similar to Very-long-chain specific acyl-CoAdehydrogenase, mitochondrial OS=Homo s	19.5228	1.00936
372	B4DIS0;A0A024R7V7;Q9P2D1;C9JFU2;H7C294;Q5JB41;A0A087WU44;H0YJG4;Q461N2;A0A2R8Y840;B7ZML1;Q8TD26-3;Q9P2D1-4;Q9P2D1-3;Q9HCK8-2;Q9HCK8;Q3L8U1-2;Q3L8U1-3;Q3L8U1	Chromodomain-helicase-DNA-binding protein 7	CHD7	tr|B4DIS0|B4DIS0_HUMAN cDNA FLJ57840, highly similar to Chromodomain-helicase-DNA-binding protein 7 OS=Homo sapiens OX=9606 PE=2 SV=1;tr|A0A024R7V7|A0A024R7V7_HUMAN Chromodomain helicase DNA binding protein 7, isoform CRA_a OS=Homo sapiens OX=9606 GN=CHD7	-1.70605	0.60206
1493	X5D2F4;B3KWV6;Q7L576;E7EW33;B7Z217;H7C229;B7Z3H2;Q7L576-2;B3KWT5;Q9NSN1;Q7L576-3;H0YL50;A0A0G2JQH3;A0A087WVZ5;A0A087WZL7;Q14650	Cytoplasmic FMR1-interacting protein 1	CYFIP1;CYFIP2	tr|X5D2F4|X5D2F4_HUMAN Cytoplasmic FMR1 interacting protein 1 isoform A (Fragment) OS=Homo sapiens OX=9606 GN=CYFIP1 PE=2 SV=1;tr|B3KWV6|B3KWV6_HUMAN Cytoplasmic FMR1-interacting protein OS=Homo sapiens OX=9606 PE=2 SV=1;sp|Q7L576|CYFP1_HUMAN Cytoplasmic F	5.62795	0.603367
952	H0Y6N5;H0Y742;A7MCZ7;E9PHI4;A0A146IHP0;A4D2Q0;O94901-6;O94901-5;O94901-8;O94901;O94901-9;B4E278;H7C2K3;Q5S4N2	SUN domain-containing protein 1	SUN1;UNC84A	tr|H0Y6N5|H0Y6N5_HUMAN SUN domain-containing protein 1 (Fragment) OS=Homo sapiens OX=9606 GN=SUN1 PE=1 SV=1;tr|H0Y742|H0Y742_HUMAN SUN domain-containing protein 1 (Fragment) OS=Homo sapiens OX=9606 GN=SUN1 PE=1 SV=1;tr|A7MCZ7|A7MCZ7_HUMAN UNC84A protein OS	18.9228	0.60206
918	B7Z601;Q53T76;A8K1Z2;A0A140VJK2;P43304-2;P43304;A0A0S2Z3S0;Q8WUQ0;F5GYK7	Glycerol-3-phosphate dehydrogenase;Glycerol-3-phosphate dehydrogenase, mitochondrial	GPD2	tr|B7Z601|B7Z601_HUMAN cDNA FLJ57187, highly similar to Glycerol-3-phosphate dehydrogenase, mitochondrial OS=Homo sapiens OX=9606 PE=2 SV=1;tr|Q53T76|Q53T76_HUMAN Glycerol-3-phosphate dehydrogenase (Fragment) OS=Homo sapiens OX=9606 GN=GPD2 PE=3 SV=1;tr|A8	18.9249	0.60206
353	A0A0S2Z4D8;A0A0S2Z4W7;A0A024R7F1;K7ELL7;B4DJQ5;P14314-2;P14314;A0A0S2Z4A0;A2VCQ4;A0A0C4DGP4	Glucosidase 2 subunit beta	PRKCSH	tr|A0A0S2Z4D8|A0A0S2Z4D8_HUMAN Protein kinase C substrate 80K-H isoform 1 (Fragment) OS=Homo sapiens OX=9606 GN=PRKCSH PE=2 SV=1;tr|A0A0S2Z4W7|A0A0S2Z4W7_HUMAN Protein kinase C substrate 80K-H isoform 2 (Fragment) OS=Homo sapiens OX=9606 GN=PRKCSH PE=2 SV=	18.9296	0.60206
555	A0A024RC48;Q10472;A8KAJ7;Q05BM8;Q68VJ7;K7EJV8;A0A1L4BJC0;A0A1L4BJA6;B3KY85;Q8IUC8;A0A1L4BJB0;Q8IUC8-2;Q8IUC8-3;H7C2I5;A0A1L4BJ91;A0A1L4BJA9;A0A1L4BJA8;Q10472-2	Polypeptide N-acetylgalactosaminyltransferase;Polypeptide N-acetylgalactosaminyltransferase 1;Polypeptide N-acetylgalactosaminyltransferase 1 soluble form	GALNT1	tr|A0A024RC48|A0A024RC48_HUMAN Polypeptide N-acetylgalactosaminyltransferase OS=Homo sapiens OX=9606 GN=GALNT1 PE=3 SV=1;sp|Q10472|GALT1_HUMAN Polypeptide N-acetylgalactosaminyltransferase 1 OS=Homo sapiens OX=9606 GN=GALNT1 PE=1 SV=1;tr|A8KAJ7|A8KAJ7_HUMA	1.51137	0.656434
940	A0A140VK39;Q9Y570;Q9Y570-4;Q9Y570-2;Q9Y570-3	Protein phosphatase methylesterase 1	PPME1	tr|A0A140VK39|A0A140VK39_HUMAN Protein phosphatase methylesterase 1 OS=Homo sapiens OX=9606 PE=2 SV=1;sp|Q9Y570|PPME1_HUMAN Protein phosphatase methylesterase 1 OS=Homo sapiens OX=9606 GN=PPME1 PE=1 SV=3;sp|Q9Y570-4|PPME1_HUMAN Isoform 4 of Protein phospha	18.9562	0.60206
359	A0A024R7I3;P61006;P61006-2;H0YMN7;Q59EP4;H0YNE9;B4DMS1;Q92930;Q53SX4;A0A2R8YDI9;H0YLJ8;H0YL94;B3KTE3;G5ELZ6;M0R257;G5ELZ5;G5EMR8;B2R8W8;A8K6I8;A0A0A1HAV6;A0A024R7G2;A0A024R7I7;G3V196;A0A2R8YFB8;B4DE50;P62820-3;P59190-2;P59190;P20337;O95716;P20336;Q96E17	Ras-related protein Rab-8A;Ras-related protein Rab-8B	RAB8A;RAB8B	tr|A0A024R7I3|A0A024R7I3_HUMAN RAB8A, member RAS oncogene family, isoform CRA_a OS=Homo sapiens OX=9606 GN=RAB8A PE=4 SV=1;sp|P61006|RAB8A_HUMAN Ras-related protein Rab-8A OS=Homo sapiens OX=9606 GN=RAB8A PE=1 SV=1;sp|P61006-2|RAB8A_HUMAN Isoform 2 of Ras-	18.9649	0.60206
839	A0A0S2Z430;Q16822;Q6IB91;H0YML5;Q16822-3;A0A0A0MS74;A0A0S2Z451;H0YM31;Q16822-2;A0A0S2Z4C0;H0YMA5;H0YMU6;H0YNG4;B4E1E8;P35558	Phosphoenolpyruvate carboxykinase [GTP], mitochondrial	PCK2	tr|A0A0S2Z430|A0A0S2Z430_HUMAN Phosphoenolpyruvate carboxykinase 2 isoform 1 (Fragment) OS=Homo sapiens OX=9606 GN=PCK2 PE=2 SV=1;sp|Q16822|PCKGM_HUMAN Phosphoenolpyruvate carboxykinase [GTP], mitochondrial OS=Homo sapiens OX=9606 GN=PCK2 PE=1 SV=4;tr|Q6IB	1.02332	0.549943
1244	A8K6I4;P42285;B4E3M6	Superkiller viralicidic activity 2-like 2	SKIV2L2	tr|A8K6I4|A8K6I4_HUMAN cDNA FLJ76877, highly similar to Homo sapiens superkiller viralicidic activity 2-like 2 (SKIV2L2), mRNA OS=Homo sapiens OX=9606 PE=2 SV=1;sp|P42285|MTREX_HUMAN Exosome RNA helicase MTR4 OS=Homo sapiens OX=9606 GN=MTREX PE=1 SV=3;tr|B	-0.795561	0.609823
2789	Q53EY9;Q8NEZ5;B4DFX7;Q8NEZ5-3;H3BTR7;H3BRE0;H3BVA4;H3BUC1;H3BTH6;Q8NEZ5-2	F-box only protein 22	FBXO22	tr|Q53EY9|Q53EY9_HUMAN F-box only protein 22 isoform a variant (Fragment) OS=Homo sapiens OX=9606 PE=2 SV=1;sp|Q8NEZ5|FBX22_HUMAN F-box only protein 22 OS=Homo sapiens OX=9606 GN=FBXO22 PE=1 SV=1;tr|B4DFX7|B4DFX7_HUMAN cDNA FLJ50132, highly similar to F-bo	20.3434	0.401782
2026	I3VM54;I3VM53;Q9Y2K7-4;Q9Y2K7-5;Q9Y2K7-2;Q9Y2K7	Lysine-specific demethylase 2A	KDM2A	tr|I3VM54|I3VM54_HUMAN Lysine-specific demethylase 2A OS=Homo sapiens OX=9606 GN=KDM2A PE=1 SV=1;tr|I3VM53|I3VM53_HUMAN F-box and leucine-rich repeat protein 11, isoform CRA_a OS=Homo sapiens OX=9606 GN=KDM2A PE=2 SV=1;sp|Q9Y2K7-4|KDM2A_HUMAN Isoform 4 of	19.86	1.49922
3002	Q8IWP6			tr|Q8IWP6|Q8IWP6_HUMAN Tubulin beta chain OS=Homo sapiens OX=9606 PE=2 SV=1	-0.653291	0.78312
540	Q9UPN1;F8VYE8;A0A024RBP2;P36873;P36873-2;F8W0W8;F8VR82;A0A087WYY5;B4DNE3	Serine/threonine-protein phosphatase;Serine/threonine-protein phosphatase PP1-gamma catalytic subunit	PPP1CC	tr|Q9UPN1|Q9UPN1_HUMAN Serine/threonine-protein phosphatase (Fragment) OS=Homo sapiens OX=9606 GN=PPP1CC PE=3 SV=1;tr|F8VYE8|F8VYE8_HUMAN Serine/threonine-protein phosphatase OS=Homo sapiens OX=9606 GN=PPP1CC PE=1 SV=1;tr|A0A024RBP2|A0A024RBP2_HUMAN Serine	-3.44571	1.12065
1454	B3KNM6;O75844	CAAX prenyl protease 1 homolog	ZMPSTE24	tr|B3KNM6|B3KNM6_HUMAN cDNA FLJ14968 fis, clone THYRO1000288, highly similar to CAAX prenyl protease 1 homolog OS=Homo sapiens OX=9606 PE=2 SV=1;sp|O75844|FACE1_HUMAN CAAX prenyl protease 1 homolog OS=Homo sapiens OX=9606 GN=ZMPSTE24 PE=1 SV=2	20.7241	1.54045
3413	V9GZ56;Q9Y4Z0;M0QXB0;U3KQK1	U6 snRNA-associated Sm-like protein LSm4	LSM4	tr|V9GZ56|V9GZ56_HUMAN U6 snRNA-associated Sm-like protein LSm4 (Fragment) OS=Homo sapiens OX=9606 GN=LSM4 PE=1 SV=1;sp|Q9Y4Z0|LSM4_HUMAN U6 snRNA-associated Sm-like protein LSm4 OS=Homo sapiens OX=9606 GN=LSM4 PE=1 SV=1;tr|M0QXB0|M0QXB0_HUMAN U6 snRNA-ass	-4.26017	2.01918
2109	O00560-2;G5EA09	Syntenin-1	SDCBP	sp|O00560-2|SDCB1_HUMAN Isoform 2 of Syntenin-1 OS=Homo sapiens OX=9606 GN=SDCBP;tr|G5EA09|G5EA09_HUMAN Syndecan binding protein (Syntenin), isoform CRA_a OS=Homo sapiens OX=9606 GN=SDCBP PE=1 SV=1	20.1962	1.42277
3105	X6RAB3;Q92738;Q92738-2	USP6 N-terminal-like protein	USP6NL	tr|X6RAB3|X6RAB3_HUMAN USP6 N-terminal-like protein OS=Homo sapiens OX=9606 GN=USP6NL PE=1 SV=1;sp|Q92738|US6NL_HUMAN USP6 N-terminal-like protein OS=Homo sapiens OX=9606 GN=USP6NL PE=1 SV=3;sp|Q92738-2|US6NL_HUMAN Isoform 2 of USP6 N-terminal-like protein	-3.77981	0.760467
599	B4DF68;A0A024RDQ0;A0A024RDS1;Q92598-2;Q92598;Q92598-4;B4DZB4;Q92598-3;B4DY72;A0A0A0MSM0;B4DZP3	Heat shock protein 105 kDa	HSPH1	tr|B4DF68|B4DF68_HUMAN cDNA FLJ55325, highly similar to Heat-shock protein 105 kDa OS=Homo sapiens OX=9606 PE=2 SV=1;tr|A0A024RDQ0|A0A024RDQ0_HUMAN Heat shock 105kDa/110kDa protein 1, isoform CRA_a OS=Homo sapiens OX=9606 GN=HSPH1 PE=3 SV=1;tr|A0A024RDS1|A	0.771179	1.18129
506	B3KY56;B3KMV5;A0A024RB17;A0A024RB16;Q9BSJ8;Q9BSJ8-2;F8VZB1	Extended synaptotagmin-1	FAM62A;ESYT1	tr|B3KY56|B3KY56_HUMAN cDNA FLJ46898 fis, clone UTERU3022168, highly similar to Protein FAM62A OS=Homo sapiens OX=9606 PE=2 SV=1;tr|B3KMV5|B3KMV5_HUMAN cDNA FLJ12728 fis, clone NT2RP2000040, highly similar to Protein FAM62A OS=Homo sapiens OX=9606 PE=2 SV=	-0.49929	0.361117
501	F8W6I7;Q6IPF2;A0A024RB53;A0A024RAZ7;P09651-3;P09651-2;P09651;Q9BSM5;H0YH80;B4E0B5;Q0VAC0;B4DP35;F8VZ49;A0A2R8Y4L2;A0A024RC46;A0A024QZ98;Q32P51;F8VTQ5;Q3MI39;F8VYN5;F8W646	Heterogeneous nuclear ribonucleoprotein A1;Heterogeneous nuclear ribonucleoprotein A1, N-terminally processed;Heterogeneous nuclear ribonucleoprotein A1-like 2	HNRNPA1;HNRPA1;hCG_2020860;RP11-78J21.1;HNRNPA1L2	tr|F8W6I7|F8W6I7_HUMAN Heterogeneous nuclear ribonucleoprotein A1 OS=Homo sapiens OX=9606 GN=HNRNPA1 PE=1 SV=2;tr|Q6IPF2|Q6IPF2_HUMAN Heterogeneous nuclear ribonucleoprotein A1 OS=Homo sapiens OX=9606 GN=HNRPA1 PE=2 SV=1;tr|A0A024RB53|A0A024RB53_HUMAN Hete	-2.33202	1.43694
1842	D6RFI3;Q9HAM0;E7EQR8;Q9GZM5;D6RGY8;Q5JTD5;H0Y9A1;D6RBQ1;D6RA04;D6RAY4	Protein YIPF;Protein YIPF3;Protein YIPF3, 36 kDa form III	YIPF3	tr|D6RFI3|D6RFI3_HUMAN Protein YIPF3 (Fragment) OS=Homo sapiens OX=9606 GN=YIPF3 PE=1 SV=1;tr|Q9HAM0|Q9HAM0_HUMAN Protein YIPF OS=Homo sapiens OX=9606 PE=2 SV=1;tr|E7EQR8|E7EQR8_HUMAN Protein YIPF3 OS=Homo sapiens OX=9606 GN=YIPF3 PE=1 SV=1;sp|Q9GZM5|YIPF3	19.7677	1.20992
2477	P49792;D3DX73;Q13073	E3 SUMO-protein ligase RanBP2	RANBP2;hCG_1994636	sp|P49792|RBP2_HUMAN E3 SUMO-protein ligase RanBP2 OS=Homo sapiens OX=9606 GN=RANBP2 PE=1 SV=2;tr|D3DX73|D3DX73_HUMAN HCG1994636, isoform CRA_b OS=Homo sapiens OX=9606 GN=hCG_1994636 PE=4 SV=1	0.122064	1.17988
45	M0QXN5;A0A024QZF1;P37198;M0QX10;M0QYY0;M0QX13;M0QZL5;M0R1S1;M0QX64;M0R302;Q8WYU3	Nuclear pore glycoprotein p62	NUP62;hCG_19665	tr|M0QXN5|M0QXN5_HUMAN Nuclear pore glycoprotein p62 OS=Homo sapiens OX=9606 GN=NUP62 PE=1 SV=1;tr|A0A024QZF1|A0A024QZF1_HUMAN HCG19665, isoform CRA_a OS=Homo sapiens OX=9606 GN=hCG_19665 PE=4 SV=1;sp|P37198|NUP62_HUMAN Nuclear pore glycoprotein p62 OS=Hom	19.0379	0.530264
1666	B4E2E1;O95487-2;O95487;O95487-3;B4DTM6	Protein transport protein Sec24B	SEC24B	tr|B4E2E1|B4E2E1_HUMAN cDNA FLJ54322, highly similar to Protein transport protein Sec24B OS=Homo sapiens OX=9606 PE=2 SV=1;sp|O95487-2|SC24B_HUMAN Isoform 2 of Protein transport protein Sec24B OS=Homo sapiens OX=9606 GN=SEC24B;sp|O95487|SC24B_HUMAN Protein	19.3304	0.583364
3265	Q9NPQ8-2;Q9NPQ8-4;Q9NPQ8;Q9NPQ8-3;E9PSI0;H0YEN0;H0YE35;A0A024RBG9;B7WPL0;Q9NVN3-4;Q9NVN3-3;Q9NVN3;Q9NVN3-1	Synembryn-A	RIC8A	sp|Q9NPQ8-2|RIC8A_HUMAN Isoform 2 of Synembryn-A OS=Homo sapiens OX=9606 GN=RIC8A;sp|Q9NPQ8-4|RIC8A_HUMAN Isoform 4 of Synembryn-A OS=Homo sapiens OX=9606 GN=RIC8A;sp|Q9NPQ8|RIC8A_HUMAN Synembryn-A OS=Homo sapiens OX=9606 GN=RIC8A PE=1 SV=3;sp|Q9NPQ8-3|RIC	1.25517	0.67799
2444	P42345;B4E2H2;B4DZD5;Q96QW8;B3KX59;B1AKP8	Serine/threonine-protein kinase mTOR	MTOR	sp|P42345|MTOR_HUMAN Serine/threonine-protein kinase mTOR OS=Homo sapiens OX=9606 GN=MTOR PE=1 SV=1;tr|B4E2H2|B4E2H2_HUMAN Serine/threonine-protein kinase mTOR OS=Homo sapiens OX=9606 PE=2 SV=1;tr|B4DZD5|B4DZD5_HUMAN Serine/threonine-protein kinase mTOR OS	0.155039	0.328786
2642	Q10567-4;Q10567-3;Q10567-2;Q10567;C9J1E7	AP-1 complex subunit beta-1	AP1B1	sp|Q10567-4|AP1B1_HUMAN Isoform 4 of AP-1 complex subunit beta-1 OS=Homo sapiens OX=9606 GN=AP1B1;sp|Q10567-3|AP1B1_HUMAN Isoform C of AP-1 complex subunit beta-1 OS=Homo sapiens OX=9606 GN=AP1B1;sp|Q10567-2|AP1B1_HUMAN Isoform B of AP-1 complex subunit be	-0.297446	0.463814
3243	Q9H7B4;Q9H7B4-3;Q3B7A0;B0QZ88;B3KN46;Q9H7B4-2;B0QZA0;A8MXR1	Histone-lysine N-methyltransferase SMYD3	SMYD3	sp|Q9H7B4|SMYD3_HUMAN Histone-lysine N-methyltransferase SMYD3 OS=Homo sapiens OX=9606 GN=SMYD3 PE=1 SV=4;sp|Q9H7B4-3|SMYD3_HUMAN Isoform 3 of Histone-lysine N-methyltransferase SMYD3 OS=Homo sapiens OX=9606 GN=SMYD3;tr|Q3B7A0|Q3B7A0_HUMAN SMYD3 protein OS	-1.52261	0.618863
612	A8K2S7;A0A024RE02;Q8NBM4;X6R5E5;B7Z6T7;Q8NBM4-3;Q8NBM4-2;Q8NBM4-4;B3KW74;Q8NBM4-5;Q5JUH4	Ubiquitin-associated domain-containing protein 2	PHGDHL1;UBAC2	tr|A8K2S7|A8K2S7_HUMAN cDNA FLJ77865 OS=Homo sapiens OX=9606 PE=2 SV=1;tr|A0A024RE02|A0A024RE02_HUMAN Phosphoglycerate dehydrogenase like 1, isoform CRA_c OS=Homo sapiens OX=9606 GN=PHGDHL1 PE=4 SV=1;sp|Q8NBM4|UBAC2_HUMAN Ubiquitin-associated domain-contai	-0.956549	1.39746
1501	B3KXZ4;H0Y8E6;B7Z8Z6;P49736;B4DSV5;Q9BWF4	DNA helicase;DNA replication licensing factor MCM2	MCM2	tr|B3KXZ4|B3KXZ4_HUMAN DNA helicase OS=Homo sapiens OX=9606 PE=2 SV=1;tr|H0Y8E6|H0Y8E6_HUMAN DNA helicase (Fragment) OS=Homo sapiens OX=9606 GN=MCM2 PE=1 SV=1;tr|B7Z8Z6|B7Z8Z6_HUMAN DNA helicase OS=Homo sapiens OX=9606 PE=2 SV=1;sp|P49736|MCM2_HUMAN DNA re	19.504	0.416886
1514	B4DED6;B4DW97;Q9BQ39;A0A087WVC1;K0J110;Q9NTA9;Q53FI9	ATP-dependent RNA helicase DDX50	DDX50;mcdrh;DKFZp761E0323	tr|B4DED6|B4DED6_HUMAN cDNA FLJ56545, highly similar to ATP-dependent RNA helicase DDX50 OS=Homo sapiens OX=9606 PE=2 SV=1;tr|B4DW97|B4DW97_HUMAN cDNA FLJ61430, highly similar to ATP-dependent RNA helicase DDX50 OS=Homo sapiens OX=9606 PE=2 SV=1;sp|Q9BQ39|	19.842	0.629585
917	A0A140VJK1;O76003	Glutaredoxin-3	GLRX3	tr|A0A140VJK1|A0A140VJK1_HUMAN Testicular tissue protein Li 75 OS=Homo sapiens OX=9606 PE=2 SV=1;sp|O76003|GLRX3_HUMAN Glutaredoxin-3 OS=Homo sapiens OX=9606 GN=GLRX3 PE=1 SV=2	0.996985	0.356626
481	Q4ZG72;A0A024RAH8;Q9NVP1;Q8N254;H7C452;Q59FR7	ATP-dependent RNA helicase DDX18	DDX18	tr|Q4ZG72|Q4ZG72_HUMAN RNA helicase (Fragment) OS=Homo sapiens OX=9606 GN=DDX18 PE=3 SV=1;tr|A0A024RAH8|A0A024RAH8_HUMAN RNA helicase OS=Homo sapiens OX=9606 GN=DDX18 PE=3 SV=1;sp|Q9NVP1|DDX18_HUMAN ATP-dependent RNA helicase DDX18 OS=Homo sapiens OX=9606	0.915211	0.68571
2677	Q13470-2;Q13470;G9BXQ3;U3KPR9;I3L334	Non-receptor tyrosine-protein kinase TNK1	TNK1	sp|Q13470-2|TNK1_HUMAN Isoform 2 of Non-receptor tyrosine-protein kinase TNK1 OS=Homo sapiens OX=9606 GN=TNK1;sp|Q13470|TNK1_HUMAN Non-receptor tyrosine-protein kinase TNK1 OS=Homo sapiens OX=9606 GN=TNK1 PE=1 SV=3;tr|G9BXQ3|G9BXQ3_HUMAN Tnk(C17Orf61) fusi	-4.22947	1.0509
3248	Q9H845;Q59FN3;Q9BUX5;H0Y8Z9;Q9H9W4;B4DGH4;D6RCD8	Acyl-CoA dehydrogenase family member 9, mitochondrial	ACAD9	sp|Q9H845|ACAD9_HUMAN Acyl-CoA dehydrogenase family member 9, mitochondrial OS=Homo sapiens OX=9606 GN=ACAD9 PE=1 SV=1;tr|Q59FN3|Q59FN3_HUMAN Acyl-Coenzyme A dehydrogenase family, member 9 variant (Fragment) OS=Homo sapiens OX=9606 PE=2 SV=1;tr|Q9BUX5|Q9BU	0.912837	0.974831
19	B2R7R5;A0A024QYY3;O60256-4;O60256-2;O60256;I3L0S1;E7EPA1;O60256-3;C9JJS3;C9K0K7;C9JDU5;I3L4G9;C9JDH0;Q6ZTP6;E7EW35	Phosphoribosyl pyrophosphate synthase-associated protein 2	PRPSAP2	tr|B2R7R5|B2R7R5_HUMAN cDNA, FLJ93570, highly similar to Homo sapiens phosphoribosyl pyrophosphate synthetase-associated protein 2 (PRPSAP2), mRNA OS=Homo sapiens OX=9606 PE=2 SV=1;tr|A0A024QYY3|A0A024QYY3_HUMAN Phosphoribosyl pyrophosphate synthetase-asso	19.4474	0.770485
123	A0A024R184;Q9H553;Q9H553-2;B3KNL8;A0A0A0MTE0	Alpha-1,3/1,6-mannosyltransferase ALG2	ALG2	tr|A0A024R184|A0A024R184_HUMAN Asparagine-linked glycosylation 2 homolog (Yeast, alpha-1,3-mannosyltransferase), isoform CRA_a OS=Homo sapiens OX=9606 GN=ALG2 PE=4 SV=1;sp|Q9H553|ALG2_HUMAN Alpha-1,3/1,6-mannosyltransferase ALG2 OS=Homo sapiens OX=9606 GN=	19.7576	1.05469
786	A0A0C4DGX8;B4DWM8;Q8NF19;B3KR70;Q15904;A6NLC6	V-type proton ATPase subunit S1	ATP6AP1;FLJ00383	tr|A0A0C4DGX8|A0A0C4DGX8_HUMAN ATPase, H+ transporting, lysosomal accessory protein 1, isoform CRA_c OS=Homo sapiens OX=9606 GN=ATP6AP1 PE=1 SV=1;tr|B4DWM8|B4DWM8_HUMAN cDNA FLJ56259, highly similar to Vacuolar ATP synthase subunit S1 OS=Homo sapiens OX=96	1.5015	0.501476
2899	Q6IBS0;B4E0A1;H0Y858;D6RG15	Twinfilin-2	TWF2	sp|Q6IBS0|TWF2_HUMAN Twinfilin-2 OS=Homo sapiens OX=9606 GN=TWF2 PE=1 SV=2;tr|B4E0A1|B4E0A1_HUMAN cDNA FLJ56277, highly similar to Toll-like receptor 9 OS=Homo sapiens OX=9606 PE=2 SV=1;tr|H0Y858|H0Y858_HUMAN Uncharacterized protein (Fragment) OS=Homo sapi	20.1415	0.366351
1519	B4DF30;Q9UP95-5;Q9UP95-2;Q9UP95-6;Q9UP95;I3L4N6;Q9UP95-3;Q9UP95-7;Q9UP95-4;Q6XSF4	Solute carrier family 12 member 4	SLC12A4	tr|B4DF30|B4DF30_HUMAN cDNA FLJ60065, highly similar to Solute carrier family 12 member 4 OS=Homo sapiens OX=9606 PE=2 SV=1;sp|Q9UP95-5|S12A4_HUMAN Isoform 5 of Solute carrier family 12 member 4 OS=Homo sapiens OX=9606 GN=SLC12A4;sp|Q9UP95-2|S12A4_HUMAN Is	0.129392	0.769827
2436	Q6FH49;P40261	Nicotinamide N-methyltransferase	NNMT	tr|Q6FH49|Q6FH49_HUMAN NNMT protein OS=Homo sapiens OX=9606 GN=NNMT PE=2 SV=1;sp|P40261|NNMT_HUMAN Nicotinamide N-methyltransferase OS=Homo sapiens OX=9606 GN=NNMT PE=1 SV=1	1.22901	0.557082
3067	Q8TCJ2	Dolichyl-diphosphooligosaccharide--protein glycosyltransferase subunit STT3B	STT3B	sp|Q8TCJ2|STT3B_HUMAN Dolichyl-diphosphooligosaccharide--protein glycosyltransferase subunit STT3B OS=Homo sapiens OX=9606 GN=STT3B PE=1 SV=1	20.3779	0.394909
587	A0A1S5UZ19;A0A024RDH6;A0A024RDD3;D6REX3;O94979-6;O94979-3;O94979-10;O94979-4;O94979-9;O94979-2;O94979;O94979-8;H7BXG7;O94979-7;D6RHZ5;O94979-5;H0Y8W8;H0YAF5;H0Y9T9;H0Y9K1;H0Y8V7;H0YAB3	Protein transport protein Sec31A	SEC31L1;SEC31A	tr|A0A1S5UZ19|A0A1S5UZ19_HUMAN Protein transport protein Sec31A OS=Homo sapiens OX=9606 GN=SEC31A PE=2 SV=1;tr|A0A024RDH6|A0A024RDH6_HUMAN SEC31-like 1 (S. cerevisiae), isoform CRA_b OS=Homo sapiens OX=9606 GN=SEC31L1 PE=4 SV=1;tr|A0A024RDD3|A0A024RDD3_HUM	-0.67373	0.412775
3416	Q9Y597-2;Q9Y597;H0Y566;B4DJX2;H0Y5P8;M0QYB1;M0R0E3;B3KP80;B4DUV2;B3KVX8;B7ZAF7;B4DLI0;M0R0S1;M0R2P6;B2R6W9;Q8TBC3;M0R204;M0R0K4;M0R0S2;M0QZF4;B4DUW2	BTB/POZ domain-containing protein KCTD3	KCTD3	sp|Q9Y597-2|KCTD3_HUMAN Isoform 2 of BTB/POZ domain-containing protein KCTD3 OS=Homo sapiens OX=9606 GN=KCTD3;sp|Q9Y597|KCTD3_HUMAN BTB/POZ domain-containing protein KCTD3 OS=Homo sapiens OX=9606 GN=KCTD3 PE=1 SV=2;tr|H0Y566|H0Y566_HUMAN BTB/POZ domain-con	20.226	1.09522
2128	O15031;Q3LIB1;Q2TBE4;A6QRG9;A0A087WU36;Q16293;E2PU09;A0PK02;A6QRH1;H0Y6J7;Q86YC4;H0YAM9;B4DRU3;Q9Y4D7	Plexin-B2	PLXNB2;Nbla00445	sp|O15031|PLXB2_HUMAN Plexin-B2 OS=Homo sapiens OX=9606 GN=PLXNB2 PE=1 SV=3;tr|Q3LIB1|Q3LIB1_HUMAN Uncharacterized protein Nbla00445 (Fragment) OS=Homo sapiens OX=9606 GN=Nbla00445 PE=2 SV=1	4.90813	1.14063
936	Q6DEN2;A0A140VK07;Q14195-2;Q14195;Q8IXW6;B4DLZ4;H0YBT4;Q96I11;B3KT07;B3KV96;E9PD68;B3KXQ5;X5DQV1;X5DNI1;Q14194;Q14194-2;H0YB87;D6RF19;Q8NAN9;Q53ET2;Q86U75;Q59GB4;A0A1C7CYX9;Q14117;Q16555-2;Q16555	Dihydropyrimidinase-related protein 3	DPYSL3	tr|Q6DEN2|Q6DEN2_HUMAN DPYSL3 protein OS=Homo sapiens OX=9606 GN=DPYSL3 PE=2 SV=1;tr|A0A140VK07|A0A140VK07_HUMAN Testicular secretory protein Li 7 OS=Homo sapiens OX=9606 PE=2 SV=1;sp|Q14195-2|DPYL3_HUMAN Isoform LCRMP-4 of Dihydropyrimidinase-related prot	-0.247895	0.335937
3213	Q9BZE1;S4R369;Q6TGK8;A6NHR2;H0Y4J2	39S ribosomal protein L37, mitochondrial	MRPL37	sp|Q9BZE1|RM37_HUMAN 39S ribosomal protein L37, mitochondrial OS=Homo sapiens OX=9606 GN=MRPL37 PE=1 SV=2;tr|S4R369|S4R369_HUMAN 39S ribosomal protein L37, mitochondrial OS=Homo sapiens OX=9606 GN=MRPL37 PE=1 SV=1;tr|Q6TGK8|Q6TGK8_HUMAN Mitochondrial ribos	2.25528	0.991411
364	A0A024R7L5;A0A024R7L8;Q92900-2;Q92900;B3KY55;A0A059XG67;A0A059XBJ1;A0A059XAL2;A0A059XAJ5;A0A059X4U2	Regulator of nonsense transcripts 1	UPF1	tr|A0A024R7L5|A0A024R7L5_HUMAN UPF1 regulator of nonsense transcripts homolog (Yeast), isoform CRA_b OS=Homo sapiens OX=9606 GN=UPF1 PE=4 SV=1;tr|A0A024R7L8|A0A024R7L8_HUMAN UPF1 regulator of nonsense transcripts homolog (Yeast), isoform CRA_a OS=Homo sapi	0.0214087	0.508891
1706	B7Z5S9;O94973;A0A0G2JS82;O94973-2;O94973-3;A0A0G2JQM1;Q8N2F8;B7Z1Q4;B3KMI7;E9PR62;A0A0G2JRF9;A0A0G2JQA4;E9PNC4;A0A0G2JRS3;Q59FN8;M0R2D9;A0A0G2JS17;A0A0G2JQT9;H0YDE9;H0YEG0	AP-2 complex subunit alpha-2	AP2A2	tr|B7Z5S9|B7Z5S9_HUMAN AP-2 complex subunit alpha OS=Homo sapiens OX=9606 PE=2 SV=1;sp|O94973|AP2A2_HUMAN AP-2 complex subunit alpha-2 OS=Homo sapiens OX=9606 GN=AP2A2 PE=1 SV=2;tr|A0A0G2JS82|A0A0G2JS82_HUMAN AP-2 complex subunit alpha-2 (Fragment) OS=Homo	3.0486	0.902626
959	A2VDI4;A0A1B0GUZ7;Q14156-2;Q14156;Q14156-3;B4DG97;B4DZ89;A0PJL1	Protein EFR3 homolog A	EFR3A	tr|A2VDI4|A2VDI4_HUMAN EFR3A protein (Fragment) OS=Homo sapiens OX=9606 GN=EFR3A PE=2 SV=1;tr|A0A1B0GUZ7|A0A1B0GUZ7_HUMAN Protein EFR3 homolog A OS=Homo sapiens OX=9606 GN=EFR3A PE=1 SV=1;sp|Q14156-2|EFR3A_HUMAN Isoform 2 of Protein EFR3 homolog A OS=Homo	19.4453	0.395564
985	A0A1W2PQY1;B7ZAP3;B7Z1N3;A0A1W2PQN1;F6W983;B7Z3L1;B7Z1F1;A0A1W2PP53;A0A1W2PP57;A0A1W2PPC3;A0A1W2PPS0;A0A1W2PPR6;A0A1W2PNP0;Q969N2-2;Q969N2-4;Q969N2-5;Q969N2;A0A1W2PPK4;B7Z4T7;A0A1W2PSC5;A0A1W2PR73;A0A1W2PQ52;A0A1W2PPQ7;A0A1W2PRZ8;A0A1W2PR92;Q969N2-3;Q969N2-6;A0A1W2PR34;A0A1W2PQA4;H7C2Y2;A0A1W2PP13	GPI transamidase component PIG-T	PIGT	tr|A0A1W2PQY1|A0A1W2PQY1_HUMAN GPI transamidase component PIG-T (Fragment) OS=Homo sapiens OX=9606 GN=PIGT PE=1 SV=1;tr|B7ZAP3|B7ZAP3_HUMAN cDNA, FLJ79257, highly similar to GPI transamidase component PIG-T OS=Homo sapiens OX=9606 PE=2 SV=1;tr|B7Z1N3|B7Z1N	1.14039	0.499181
679	A0A087X054;B7Z2N4;Q9Y4L1;E9PJ21;Q05D91;A0A087WWI4;Q6IN67;K7EQK2;B7Z766;B3KXH0;Q9Y4L1-2;A0A024R3G0;J3KTF1;J3QL06;B7Z602;A0A087X214;A0A087WW13;Q68D25;Q9BST8;J3QQH7;J3QLE9;B7Z4E6	Hypoxia up-regulated protein 1	HYOU1	tr|A0A087X054|A0A087X054_HUMAN Hypoxia up-regulated protein 1 OS=Homo sapiens OX=9606 GN=HYOU1 PE=1 SV=1;tr|B7Z2N4|B7Z2N4_HUMAN cDNA FLJ56074, highly similar to 150 kDa oxygen-regulated protein (Orp150) OS=Homo sapiens OX=9606 PE=2 SV=1;sp|Q9Y4L1|HYOU1_HUM	19.2234	0.562226
1478	B3KT25;Q96S55-3;Q96S55-2;Q96S55;Q96S55-4	ATPase WRNIP1	WRNIP1	tr|B3KT25|B3KT25_HUMAN cDNA FLJ37504 fis, clone BRAWH2017103, highly similar to ATPase WRNIP1 OS=Homo sapiens OX=9606 PE=2 SV=1;sp|Q96S55-3|WRIP1_HUMAN Isoform 3 of ATPase WRNIP1 OS=Homo sapiens OX=9606 GN=WRNIP1;sp|Q96S55-2|WRIP1_HUMAN Isoform 2 of ATPase	1.64989	1.26432
769	A0A0C4DFV0;Q9H469;X6RJB2;X6RGT4;X6RHD7;X6RCZ8	F-box/LRR-repeat protein 15	FBXL15	tr|A0A0C4DFV0|A0A0C4DFV0_HUMAN F-box/LRR-repeat protein 15 OS=Homo sapiens OX=9606 GN=FBXL15 PE=1 SV=1;sp|Q9H469|FXL15_HUMAN F-box/LRR-repeat protein 15 OS=Homo sapiens OX=9606 GN=FBXL15 PE=1 SV=2;tr|X6RJB2|X6RJB2_HUMAN F-box/LRR-repeat protein 15 (Fragmen	21.1823	0.304653
136	A0A024R1K5;Q9UG56-2;Q9UG56;H0Y7P7;B4DPS3;B1AKM8;B1AKM6	Phosphatidylserine decarboxylase proenzyme;Phosphatidylserine decarboxylase alpha chain;Phosphatidylserine decarboxylase beta chain	PISD	tr|A0A024R1K5|A0A024R1K5_HUMAN Phosphatidylserine decarboxylase proenzyme, mitochondrial OS=Homo sapiens OX=9606 GN=PISD PE=3 SV=1;sp|Q9UG56-2|PISD_HUMAN Isoform 2 of Phosphatidylserine decarboxylase proenzyme, mitochondrial OS=Homo sapiens OX=9606 GN=PISD	-0.105466	0.60206
1630	B4DW52;Q6PJ43;B7ZAP6;B3KWQ3;Q96FU6;A5GZ75;A4UCT3;Q96DE1;F1BXA6;A0A2R8YFE2;A0AUL6;Q562Z7;Q562Y6;Q562X9;Q562N8;Q562R8;Q562L6;Q562Z4;Q562Y8;Q562M5;Q562M3;Q562S0;Q562Z6		ACTG1	tr|B4DW52|B4DW52_HUMAN cDNA FLJ55253, highly similar to Actin, cytoplasmic 1 OS=Homo sapiens OX=9606 PE=2 SV=1;tr|Q6PJ43|Q6PJ43_HUMAN ACTG1 protein (Fragment) OS=Homo sapiens OX=9606 GN=ACTG1 PE=2 SV=1;tr|B7ZAP6|B7ZAP6_HUMAN cDNA, FLJ79260, highly similar	19.2755	0.60206
2856	Q5T200;Q5T200-2;Q6PJ96;Q32Q34;A0PJJ2;B3KQG8;B3KMG8;Q5T9K0;A0A087WX14	Zinc finger CCCH domain-containing protein 13	ZC3H13	sp|Q5T200|ZC3HD_HUMAN Zinc finger CCCH domain-containing protein 13 OS=Homo sapiens OX=9606 GN=ZC3H13 PE=1 SV=1;sp|Q5T200-2|ZC3HD_HUMAN Isoform 2 of Zinc finger CCCH domain-containing protein 13 OS=Homo sapiens OX=9606 GN=ZC3H13	0.0527421	0.681862
1721	B7ZAT6;P35610-3;P35610-2;P35610;B1APM4;B4DFD8	O-acyltransferase;Sterol O-acyltransferase 1	SOAT1	tr|B7ZAT6|B7ZAT6_HUMAN O-acyltransferase OS=Homo sapiens OX=9606 PE=2 SV=1;sp|P35610-3|SOAT1_HUMAN Isoform 3 of Sterol O-acyltransferase 1 OS=Homo sapiens OX=9606 GN=SOAT1;sp|P35610-2|SOAT1_HUMAN Isoform 2 of Sterol O-acyltransferase 1 OS=Homo sapiens OX=9	19.7466	0.870994
2061	K4DI93;Q13620-3;Q13620-1;Q13620;A6NE76	Cullin-4B	CUL4B	tr|K4DI93|K4DI93_HUMAN Cullin 4B, isoform CRA_e OS=Homo sapiens OX=9606 GN=CUL4B PE=1 SV=1;sp|Q13620-3|CUL4B_HUMAN Isoform 3 of Cullin-4B OS=Homo sapiens OX=9606 GN=CUL4B;sp|Q13620-1|CUL4B_HUMAN Isoform 2 of Cullin-4B OS=Homo sapiens OX=9606 GN=CUL4B;sp|Q1	1.79264	0.62766
3340	Q9UGI8-2;B2RDR4;A4D0U5;Q9UGI8;Q53GU1;E0X098;B7Z5L5;F8W7T0;Q9Y423;B7Z6L5;H7BYK1	Testin	TES	sp|Q9UGI8-2|TES_HUMAN Isoform 2 of Testin OS=Homo sapiens OX=9606 GN=TES;tr|B2RDR4|B2RDR4_HUMAN cDNA, FLJ96732, highly similar to Homo sapiens testis derived transcript (3 LIM domains) (TES), transcript variant 1, mRNA OS=Homo sapiens OX=9606 PE=2 SV=1;tr|	0.949898	0.717454
30	A0A0D9SFK2;A0A024QZ63;Q92614-2;Q92614-3;Q92614-4;Q92614;B4E0T8;B4DYM1;Q92614-5;B4DZ32;H0YEV9;A0A1B0GWJ6	Unconventional myosin-XVIIIa	MYO18A;hCG_27198	tr|A0A0D9SFK2|A0A0D9SFK2_HUMAN Unconventional myosin-XVIIIa OS=Homo sapiens OX=9606 GN=MYO18A PE=1 SV=1;tr|A0A024QZ63|A0A024QZ63_HUMAN HCG27198, isoform CRA_c OS=Homo sapiens OX=9606 GN=hCG_27198 PE=3 SV=1;sp|Q92614-2|MY18A_HUMAN Isoform 2 of Unconventiona	2.18739	0.436781
2042	J3KPS0;Q9NXW2;Q9NXW2-2;V9GYN7;Q659G2;V9GY70	DnaJ homolog subfamily B member 12	DNAJB12	tr|J3KPS0|J3KPS0_HUMAN DnaJ (Hsp40) homolog, subfamily B, member 12, isoform CRA_c OS=Homo sapiens OX=9606 GN=DNAJB12 PE=1 SV=1;sp|Q9NXW2|DJB12_HUMAN DnaJ homolog subfamily B member 12 OS=Homo sapiens OX=9606 GN=DNAJB12 PE=1 SV=5;sp|Q9NXW2-2|DJB12_HUMAN Is	20.6107	0.463096
218	A0A024R3U8;Q8WWC4;H7C0V0	Uncharacterized protein C2orf47, mitochondrial	FLJ22555;C2orf47	tr|A0A024R3U8|A0A024R3U8_HUMAN Uncharacterized protein OS=Homo sapiens OX=9606 GN=FLJ22555 PE=4 SV=1;sp|Q8WWC4|MAIP1_HUMAN m-AAA protease-interacting protein 1, mitochondrial OS=Homo sapiens OX=9606 GN=MAIP1 PE=1 SV=1;tr|H7C0V0|H7C0V0_HUMAN m-AAA protease-	1.52174	0.731883
1707	Q86XZ2;Q58EX4;B7Z5X1;Q562F2;Q16537-2;Q16537;B5BTZ7;Q59EK0;B7Z7C0;Q16537-3;A0A024R593;Q15173-2;Q15173	Serine/threonine-protein phosphatase 2A 56 kDa regulatory subunit epsilon isoform	PPP2R5E	tr|Q86XZ2|Q86XZ2_HUMAN PPP2R5E protein (Fragment) OS=Homo sapiens OX=9606 GN=PPP2R5E PE=2 SV=1;tr|Q58EX4|Q58EX4_HUMAN PPP2R5E protein (Fragment) OS=Homo sapiens OX=9606 GN=PPP2R5E PE=2 SV=1;tr|B7Z5X1|B7Z5X1_HUMAN Serine/threonine-protein phosphatase 2A 56	20.7064	1.121
251	Q53GL1;A0A024R4E1;Q9HAN9;B1AN62	Nicotinamide-nucleotide adenylyltransferase;Nicotinamide/nicotinic acid mononucleotide adenylyltransferase 1	NMNAT1	tr|Q53GL1|Q53GL1_HUMAN Nicotinamide-nucleotide adenylyltransferase (Fragment) OS=Homo sapiens OX=9606 PE=2 SV=1;tr|A0A024R4E1|A0A024R4E1_HUMAN Nicotinamide-nucleotide adenylyltransferase OS=Homo sapiens OX=9606 GN=NMNAT1 PE=3 SV=1;sp|Q9HAN9|NMNA1_HUMAN Nic	19.9877	1.08359
3384	Q9Y295;Q9UFA5	Developmentally-regulated GTP-binding protein 1	DRG1	sp|Q9Y295|DRG1_HUMAN Developmentally-regulated GTP-binding protein 1 OS=Homo sapiens OX=9606 GN=DRG1 PE=1 SV=1	0.410901	0.468686
1500	E9PD53;B3KXX5;Q9NTJ3;Q9NTJ3-2;B3KVJ5;Q6NSG3;Q58F29;Q6P169;C9JR83;C9J578;C9JVD8;C9J9E4;C9JWF0;C9IYK2;C9JJ64	Structural maintenance of chromosomes protein;Structural maintenance of chromosomes protein 4	SMC4	tr|E9PD53|E9PD53_HUMAN Structural maintenance of chromosomes protein OS=Homo sapiens OX=9606 GN=SMC4 PE=1 SV=1;tr|B3KXX5|B3KXX5_HUMAN Structural maintenance of chromosomes protein OS=Homo sapiens OX=9606 PE=2 SV=1;sp|Q9NTJ3|SMC4_HUMAN Structural maintenanc	-0.658204	0.788338
637	A0AR27;B7Z5E4;A0A087WU65;B7Z360;A0A2R8YE10;Q9NRW7;B7Z1J7;A0A2R8YF01;A0A1B0GXI6;B7Z5D4;A0A2R8YD95;Q9NRW7-2;B7Z7G7;Q5T4Q0	Vacuolar protein sorting-associated protein 45	VPS45	tr|A0AR27|A0AR27_HUMAN Vacuolar protein sorting 45A isoform OS=Homo sapiens OX=9606 PE=2 SV=1;tr|B7Z5E4|B7Z5E4_HUMAN cDNA FLJ54614, highly similar to Vacuolar protein sorting-associated protein 45 OS=Homo sapiens OX=9606 PE=2 SV=1;tr|A0A087WU65|A0A087WU65_	19.808	0.873058
2631	Q07960;B4DPZ4;H0YE29;E9PNR6;O15376	Rho GTPase-activating protein 1	ARHGAP1	sp|Q07960|RHG01_HUMAN Rho GTPase-activating protein 1 OS=Homo sapiens OX=9606 GN=ARHGAP1 PE=1 SV=1;tr|B4DPZ4|B4DPZ4_HUMAN cDNA FLJ60782, highly similar to Rho-GTPase-activating protein 1 OS=Homo sapiens OX=9606 PE=2 SV=1;tr|H0YE29|H0YE29_HUMAN Rho GTPase-a	19.9191	0.981003
3187	Q9BTU6;E9PAM4;B4DEP8	Phosphatidylinositol 4-kinase type 2-alpha	PI4K2A	sp|Q9BTU6|P4K2A_HUMAN Phosphatidylinositol 4-kinase type 2-alpha OS=Homo sapiens OX=9606 GN=PI4K2A PE=1 SV=1;tr|E9PAM4|E9PAM4_HUMAN Uncharacterized protein OS=Homo sapiens OX=9606 PE=4 SV=1;tr|B4DEP8|B4DEP8_HUMAN cDNA FLJ56960, highly similar to Homo sapie	2.92984	0.723464
1230	A8K5H7;Q96TA2-3;Q96TA2-2;Q96TA2;Q9Y2Q2;Q9NQ51;Q96I63;R4GNA5	ATP-dependent zinc metalloprotease YME1L1	YME1L1;FTSH	tr|A8K5H7|A8K5H7_HUMAN cDNA FLJ77542, highly similar to Homo sapiens YME1-like 1 (S. cerevisiae) (YME1L1), transcript variant 3, mRNA OS=Homo sapiens OX=9606 PE=2 SV=1;sp|Q96TA2-3|YMEL1_HUMAN Isoform 3 of ATP-dependent zinc metalloprotease YME1L1 OS=Homo s	-0.43412	0.468572
1150	A6NHL2-2;A6NHL2	Tubulin alpha chain-like 3	TUBAL3	sp|A6NHL2-2|TBAL3_HUMAN Isoform 2 of Tubulin alpha chain-like 3 OS=Homo sapiens OX=9606 GN=TUBAL3;sp|A6NHL2|TBAL3_HUMAN Tubulin alpha chain-like 3 OS=Homo sapiens OX=9606 GN=TUBAL3 PE=1 SV=2	0.899741	0.548785
873	Q53FV3;B3KM48;A0A0S2Z5H7;D6RAX7;D6RFN0;Q9BT78;Q9BT78-2;D6RD63	COP9 signalosome complex subunit 4	COPS4	tr|Q53FV3|Q53FV3_HUMAN COP9 signalosome subunit 4 variant (Fragment) OS=Homo sapiens OX=9606 PE=2 SV=1;tr|B3KM48|B3KM48_HUMAN cDNA FLJ10286 fis, clone HEMBB1001384, highly similar to COP9 signalosome complex subunit 4 OS=Homo sapiens OX=9606 PE=2 SV=1;tr|A	1.42808	1.54191
1119	A4D0Z3;B4DLJ3;P84085;C9J1Z8	ADP-ribosylation factor 5	ARF5	tr|A4D0Z3|A4D0Z3_HUMAN ADP-ribosylation factor 5 OS=Homo sapiens OX=9606 GN=ARF5 PE=2 SV=1;tr|B4DLJ3|B4DLJ3_HUMAN cDNA FLJ51495, highly similar to ADP-ribosylation factor 5 OS=Homo sapiens OX=9606 PE=2 SV=1;sp|P84085|ARF5_HUMAN ADP-ribosylation factor 5 OS	0.0786858	0.562061
780	J3QRU8;A0A0C4DGN6;Q59FC3;Q9Y2X7;Q9Y2X7-3;Q7Z2E5;B4DMF7;Q9Y2X7-2;K7EN79;J3QLH1	ARF GTPase-activating protein GIT1	GIT1	tr|J3QRU8|J3QRU8_HUMAN ARF GTPase-activating protein GIT1 OS=Homo sapiens OX=9606 GN=GIT1 PE=1 SV=1;tr|A0A0C4DGN6|A0A0C4DGN6_HUMAN ARF GTPase-activating protein GIT1 OS=Homo sapiens OX=9606 GN=GIT1 PE=1 SV=1;tr|Q59FC3|Q59FC3_HUMAN G protein-coupled recepto	20.155	1.29681
1958	G5E9W7;G5E9V5;P82650;Q8NBL6;H7C5F2;Q59GX8;H7C5H3;A8K9Y7;P82650-2;H7C5L9;C9J5D8	28S ribosomal protein S22, mitochondrial	MRPS22	tr|G5E9W7|G5E9W7_HUMAN 28S ribosomal protein S22, mitochondrial OS=Homo sapiens OX=9606 GN=MRPS22 PE=1 SV=1;tr|G5E9V5|G5E9V5_HUMAN 28S ribosomal protein S22, mitochondrial OS=Homo sapiens OX=9606 GN=MRPS22 PE=1 SV=1;sp|P82650|RT22_HUMAN 28S ribosomal prote	20.2544	1.54607
2975	X6R3U4;Q7Z736-4;Q7Z736-3;Q7Z736-2;Q7Z736;K7EK04	Pleckstrin homology domain-containing family H member 3	PLEKHH3	tr|X6R3U4|X6R3U4_HUMAN Pleckstrin homology domain-containing family H member 3 OS=Homo sapiens OX=9606 GN=PLEKHH3 PE=1 SV=1;sp|Q7Z736-4|PKHH3_HUMAN Isoform 4 of Pleckstrin homology domain-containing family H member 3 OS=Homo sapiens OX=9606 GN=PLEKHH3;sp|Q	19.3786	0.60206
3341	Q9UGJ1-2;Q9UGJ1;Q9BVR6;H3BPU4;H3BNL9;H3BN56;H3BS59	Gamma-tubulin complex component 4	TUBGCP4	sp|Q9UGJ1-2|GCP4_HUMAN Isoform 2 of Gamma-tubulin complex component 4 OS=Homo sapiens OX=9606 GN=TUBGCP4;sp|Q9UGJ1|GCP4_HUMAN Gamma-tubulin complex component 4 OS=Homo sapiens OX=9606 GN=TUBGCP4 PE=1 SV=1;tr|Q9BVR6|Q9BVR6_HUMAN Gamma-tubulin complex compon	-0.248855	0.733569
622	A0A087WSW7;F6XU50;Q6I7N8;Q9NRZ9-4;Q9NRZ9-3;Q9NRZ9-2;Q9NRZ9;A0A0B4J1V9;Q9NRZ9-6;Q9NRZ9-5;Q9NW36;Q9NRZ9-8;Q9NRZ9-7;B1ALG6	Lymphoid-specific helicase	HELLS	tr|A0A087WSW7|A0A087WSW7_HUMAN Helicase, lymphoid-specific, isoform CRA_d OS=Homo sapiens OX=9606 GN=HELLS PE=1 SV=1;tr|F6XU50|F6XU50_HUMAN Helicase, lymphoid-specific, isoform CRA_l OS=Homo sapiens OX=9606 GN=HELLS PE=1 SV=1;tr|Q6I7N8|Q6I7N8_HUMAN Lymphoi	0.0577155	0.600517
1012	A0A2K4XGA8			tr|A0A2K4XGA8|A0A2K4XGA8_HUMAN MHC class I antigen OS=Homo sapiens OX=9606 GN=HLA-B PE=3 SV=1	19.3814	0.60206
2603	Q86WV4;P82933	28S ribosomal protein S9, mitochondrial	MRPS9	tr|Q86WV4|Q86WV4_HUMAN MRPS9 protein (Fragment) OS=Homo sapiens OX=9606 GN=MRPS9 PE=2 SV=1;sp|P82933|RT09_HUMAN 28S ribosomal protein S9, mitochondrial OS=Homo sapiens OX=9606 GN=MRPS9 PE=1 SV=2	1.41325	1.45861
10	Q8WUB5;Q96JZ5;A0A024QYS2;Q9HD45;Q5TB53;Q8NCC4;Q96K55;B4DN13	Transmembrane 9 superfamily member 3	TM9SF3;SMBP	tr|Q8WUB5|Q8WUB5_HUMAN Transmembrane 9 superfamily member (Fragment) OS=Homo sapiens OX=9606 GN=TM9SF3 PE=2 SV=2;tr|Q96JZ5|Q96JZ5_HUMAN Transmembrane 9 superfamily member OS=Homo sapiens OX=9606 GN=SMBP PE=2 SV=1;tr|A0A024QYS2|A0A024QYS2_HUMAN Transmembran	19.3939	0.390696
1471	B3KRQ2;Q86XI2;Q86XI2-2;Q9NXD3;H0Y6U5;F8WE06;B4DHE5;B4DXB7	Condensin-2 complex subunit G2	NCAPG2	tr|B3KRQ2|B3KRQ2_HUMAN cDNA FLJ34689 fis, clone MESAN2000815, highly similar to Homo sapiens leucine zipper protein 5 (LUZP5), mRNA OS=Homo sapiens OX=9606 PE=2 SV=1;sp|Q86XI2|CNDG2_HUMAN Condensin-2 complex subunit G2 OS=Homo sapiens OX=9606 GN=NCAPG2 PE=	0.0218498	0.62022
2171	O60476;H0Y543;H0Y7H1;Q5T9E3;B3KMI5	Mannosyl-oligosaccharide 1,2-alpha-mannosidase IB	MAN1A2	sp|O60476|MA1A2_HUMAN Mannosyl-oligosaccharide 1,2-alpha-mannosidase IB OS=Homo sapiens OX=9606 GN=MAN1A2 PE=1 SV=1	20.3554	1.92293
2682	Q549U1;Q13595-2;Q13595-4;Q13595-3;Q13595	Transformer-2 protein homolog alpha	HSU53209;TRA2A	tr|Q549U1|Q549U1_HUMAN Putative MAPK activating protein OS=Homo sapiens OX=9606 GN=HSU53209 PE=2 SV=1;sp|Q13595-2|TRA2A_HUMAN Isoform Short of Transformer-2 protein homolog alpha OS=Homo sapiens OX=9606 GN=TRA2A;sp|Q13595-4|TRA2A_HUMAN Isoform 4 of Transfo	22.132	0.735618
554	A0A024RC42;P19022-2;P19022;Q8ND09;C9J8J8;A0A0G2JRA4;A0A087WX99;Q8NB64;B2RCN5;P55283-2;P55283	Cadherin-2	CDH2	tr|A0A024RC42|A0A024RC42_HUMAN Cadherin 2, type 1, N-cadherin (Neuronal), isoform CRA_b OS=Homo sapiens OX=9606 GN=CDH2 PE=4 SV=1;sp|P19022-2|CADH2_HUMAN Isoform 2 of Cadherin-2 OS=Homo sapiens OX=9606 GN=CDH2;sp|P19022|CADH2_HUMAN Cadherin-2 OS=Homo sapie	19.4341	0.60206
229	B3KMB8;A0A024R419;Q9NYY8-2;Q9NYY8	FAST kinase domain-containing protein 2	KIAA0971;FASTKD2	tr|B3KMB8|B3KMB8_HUMAN cDNA FLJ10654 fis, clone NT2RP2005901, highly similar to FAST kinase domains-containing protein 2 OS=Homo sapiens OX=9606 PE=2 SV=1;tr|A0A024R419|A0A024R419_HUMAN KIAA0971, isoform CRA_b OS=Homo sapiens OX=9606 GN=KIAA0971 PE=4 SV=1;	0.537666	0.484813
2913	Q6P1J9;A0A0S2Z5M9;A0A1B0GUB2;A0A0S2Z5N1;B4DV47;A0A2R8YHB3;A0A2R8Y640	Parafibromin	CDC73	sp|Q6P1J9|CDC73_HUMAN Parafibromin OS=Homo sapiens OX=9606 GN=CDC73 PE=1 SV=1;tr|A0A0S2Z5M9|A0A0S2Z5M9_HUMAN Cell division cycle 73 Paf1/RNA polymerase II complex component-like protein isoform 1 (Fragment) OS=Homo sapiens OX=9606 GN=CDC73 PE=2 SV=1;tr|A0A	-0.658535	0.59736
3120	Q96AE4;E9PEB5;A0A1Z1G4M2;Q6PJY1	Far upstream element-binding protein 1	FUBP1	sp|Q96AE4|FUBP1_HUMAN Far upstream element-binding protein 1 OS=Homo sapiens OX=9606 GN=FUBP1 PE=1 SV=3;tr|E9PEB5|E9PEB5_HUMAN Far upstream element-binding protein 1 OS=Homo sapiens OX=9606 GN=FUBP1 PE=1 SV=1;tr|A0A1Z1G4M2|A0A1Z1G4M2_HUMAN FUBP1 OS=Homo sa	20.335	1.61705
1347	B4DSJ8;B4DIQ0;B2R623;O60942-4;O60942-2;O60942;O60942-3	mRNA-capping enzyme;Polynucleotide 5-triphosphatase;mRNA guanylyltransferase	RNGTT	tr|B4DSJ8|B4DSJ8_HUMAN mRNA-capping enzyme OS=Homo sapiens OX=9606 PE=2 SV=1;tr|B4DIQ0|B4DIQ0_HUMAN mRNA-capping enzyme OS=Homo sapiens OX=9606 PE=2 SV=1;tr|B2R623|B2R623_HUMAN mRNA-capping enzyme OS=Homo sapiens OX=9606 PE=2 SV=1;sp|O60942-4|MCE1_HUMAN Is	20.3041	1.02714
2833	Q5HYM2;Q96QK1;Q53FR4	Vacuolar protein sorting-associated protein 35	DKFZp686O2462;VPS35	tr|Q5HYM2|Q5HYM2_HUMAN Uncharacterized protein DKFZp686O2462 (Fragment) OS=Homo sapiens OX=9606 GN=DKFZp686O2462 PE=4 SV=1;sp|Q96QK1|VPS35_HUMAN Vacuolar protein sorting-associated protein 35 OS=Homo sapiens OX=9606 GN=VPS35 PE=1 SV=2;tr|Q53FR4|Q53FR4_HUMA	0.288312	1.10798
2690	Q13813-3;A0A0D9SF54;A0A024R889;B4DTV8;Q9UG16	Spectrin alpha chain, non-erythrocytic 1	SPTAN1	sp|Q13813-3|SPTN1_HUMAN Isoform 3 of Spectrin alpha chain, non-erythrocytic 1 OS=Homo sapiens OX=9606 GN=SPTAN1;tr|A0A0D9SF54|A0A0D9SF54_HUMAN Spectrin alpha chain, non-erythrocytic 1 OS=Homo sapiens OX=9606 GN=SPTAN1 PE=1 SV=1;tr|A0A024R889|A0A024R889_HUM	19.7615	0.753698
588	A0A024RDE5;Q9UN86	Ras GTPase-activating protein-binding protein 2	G3BP2	tr|A0A024RDE5|A0A024RDE5_HUMAN Ras-GTPase activating protein SH3 domain-binding protein 2, isoform CRA_a OS=Homo sapiens OX=9606 GN=G3BP2 PE=4 SV=1;sp|Q9UN86|G3BP2_HUMAN Ras GTPase-activating protein-binding protein 2 OS=Homo sapiens OX=9606 GN=G3BP2 PE=1	-9.09583	1.46644
1251	A8K6X9;Q6PD62;H0YCE8	RNA polymerase-associated protein CTR9 homolog	CTR9	tr|A8K6X9|A8K6X9_HUMAN cDNA FLJ76427, highly similar to Homo sapiens SH2 domain binding protein 1 (tetratricopeptide repeat containing) (SH2BP1), mRNA OS=Homo sapiens OX=9606 PE=2 SV=1;sp|Q6PD62|CTR9_HUMAN RNA polymerase-associated protein CTR9 homolog OS=	0.882079	0.703201
1810	D3DRP5;Q9H4G4;Q5VZR0;B4DQC5;A0A087WUM5	Golgi-associated plant pathogenesis-related protein 1	C9orf19;GLIPR2	tr|D3DRP5|D3DRP5_HUMAN Chromosome 9 open reading frame 19, isoform CRA_a (Fragment) OS=Homo sapiens OX=9606 GN=C9orf19 PE=4 SV=1;sp|Q9H4G4|GAPR1_HUMAN Golgi-associated plant pathogenesis-related protein 1 OS=Homo sapiens OX=9606 GN=GLIPR2 PE=1 SV=3;tr|Q5VZ	0.260637	1.05665
3135	Q96D53;M0R001;A0A024R0Q9;Q96D53-2;M0R011	AarF domain-containing protein kinase 4	ADCK4	sp|Q96D53|COQ8B_HUMAN Atypical kinase COQ8B, mitochondrial OS=Homo sapiens OX=9606 GN=COQ8B PE=1 SV=2;tr|M0R001|M0R001_HUMAN Atypical kinase COQ8B, mitochondrial (Fragment) OS=Homo sapiens OX=9606 GN=COQ8B PE=1 SV=1;tr|A0A024R0Q9|A0A024R0Q9_HUMAN AarF doma	0.791084	1.51665
66	A0A024QZW3;Q96S59;Q96S59-2;Q96S59-3;A0A024R014;O60738	Ran-binding protein 9	RANBP9	tr|A0A024QZW3|A0A024QZW3_HUMAN RAN binding protein 9, isoform CRA_a OS=Homo sapiens OX=9606 GN=RANBP9 PE=4 SV=1;sp|Q96S59|RANB9_HUMAN Ran-binding protein 9 OS=Homo sapiens OX=9606 GN=RANBP9 PE=1 SV=1;sp|Q96S59-2|RANB9_HUMAN Isoform 2 of Ran-binding protein	-0.707516	1.35043
2873	Q8IWQ7;Q5VT25-3;Q5VT25-5;Q5VT25-6;H0Y7V8;B9EGA7;A0A0A0MRJ0;Q5VT25-4;Q5VT25;Q5VT25-2;H0Y6V3;Q5HYB0;A0A0A0MRJ1;H0Y5V1;H0Y6R0;Q9H5K7	Non-specific serine/threonine protein kinase;Serine/threonine-protein kinase MRCK alpha	CDC42BPA;DKFZp686P1738	tr|Q8IWQ7|Q8IWQ7_HUMAN Non-specific serine/threonine protein kinase OS=Homo sapiens OX=9606 PE=2 SV=1;sp|Q5VT25-3|MRCKA_HUMAN Isoform 3 of Serine/threonine-protein kinase MRCK alpha OS=Homo sapiens OX=9606 GN=CDC42BPA;sp|Q5VT25-5|MRCKA_HUMAN Isoform 5 of S	19.4807	0.60206
279	A0A024R570;A0A024R5E3;A0A024R5D2;O00255-3;O00255-2;O00255;Q9UE24;E7EN32;E7ET29;G9G6R5;E7EPR4	Menin	MEN1	tr|A0A024R570|A0A024R570_HUMAN Multiple endocrine neoplasia I, isoform CRA_c OS=Homo sapiens OX=9606 GN=MEN1 PE=4 SV=1;tr|A0A024R5E3|A0A024R5E3_HUMAN Multiple endocrine neoplasia I, isoform CRA_b OS=Homo sapiens OX=9606 GN=MEN1 PE=4 SV=1;tr|A0A024R5D2|A0A0	1.11361	0.842889
2792	Q53FX5;Q9NUP9;G3V1D4;H0YIA8;O14910;H0YI92;J3KN23;Q9HAP6	Protein lin-7 homolog C;Protein lin-7 homolog A	LIN7C;LIN7A	tr|Q53FX5|Q53FX5_HUMAN Lin-7 homolog C variant (Fragment) OS=Homo sapiens OX=9606 PE=2 SV=1;sp|Q9NUP9|LIN7C_HUMAN Protein lin-7 homolog C OS=Homo sapiens OX=9606 GN=LIN7C PE=1 SV=1;tr|G3V1D4|G3V1D4_HUMAN Lin-7 homolog C (C. elegans), isoform CRA_b OS=Homo	19.4896	0.60206
2537	Q5JQ44;P61225	Ras-related protein Rap-2b	DKFZp547A0616;RAP2B	tr|Q5JQ44|Q5JQ44_HUMAN Uncharacterized protein DKFZp547A0616 (Fragment) OS=Homo sapiens OX=9606 GN=DKFZp547A0616 PE=2 SV=1;sp|P61225|RAP2B_HUMAN Ras-related protein Rap-2b OS=Homo sapiens OX=9606 GN=RAP2B PE=1 SV=1	20.1505	1.06759
3214	Q9C0E8-2;Q9C0E8;Q9C0E8-4;B7Z7F5;B7Z829;B7ZLA9;Q9C0E8-3;C9JM95;C9JL94	Protein lunapark	LNP;KIAA1715	sp|Q9C0E8-2|LNP_HUMAN Isoform 2 of Endoplasmic reticulum junction formation protein lunapark OS=Homo sapiens OX=9606 GN=LNPK;sp|Q9C0E8|LNP_HUMAN Endoplasmic reticulum junction formation protein lunapark OS=Homo sapiens OX=9606 GN=LNPK PE=1 SV=2;sp|Q9C0E8-4	19.7766	0.733172
2290	Q6IAX9;P08240-2;P08240;A0A024R3M0	Signal recognition particle receptor subunit alpha	SRPR	tr|Q6IAX9|Q6IAX9_HUMAN SRPR protein OS=Homo sapiens OX=9606 GN=SRPR PE=2 SV=1;sp|P08240-2|SRPRA_HUMAN Isoform 2 of Signal recognition particle receptor subunit alpha OS=Homo sapiens OX=9606 GN=SRPRA;sp|P08240|SRPRA_HUMAN Signal recognition particle recepto	-0.452877	0.415375
3393	Q9Y316-2;Q9Y316;A8K3Y8;Q9Y316-3;A0A1S5UZ25;Q2VIM3;B5MCI6	Protein MEMO1	MEMO1	sp|Q9Y316-2|MEMO1_HUMAN Isoform 2 of Protein MEMO1 OS=Homo sapiens OX=9606 GN=MEMO1;sp|Q9Y316|MEMO1_HUMAN Protein MEMO1 OS=Homo sapiens OX=9606 GN=MEMO1 PE=1 SV=1;tr|A8K3Y8|A8K3Y8_HUMAN cDNA FLJ76141 OS=Homo sapiens OX=9606 PE=2 SV=1;sp|Q9Y316-3|MEMO1_HUMA	2.44396	0.858884
1404	B2RCM6;Q96S44;Q5JZ02	TP53-regulating kinase	TP53RK	tr|B2RCM6|B2RCM6_HUMAN cDNA, FLJ96161 OS=Homo sapiens OX=9606 PE=2 SV=1;sp|Q96S44|PRPK_HUMAN EKC/KEOPS complex subunit TP53RK OS=Homo sapiens OX=9606 GN=TP53RK PE=1 SV=2	-1.85033	1.03621
3406	Q9Y446;Q9Y446-2;H0YEY5	Plakophilin-3	PKP3	sp|Q9Y446|PKP3_HUMAN Plakophilin-3 OS=Homo sapiens OX=9606 GN=PKP3 PE=1 SV=1;sp|Q9Y446-2|PKP3_HUMAN Isoform PKP3b of Plakophilin-3 OS=Homo sapiens OX=9606 GN=PKP3	20.5614	1.99802
2131	O15091-4;O15091-2;O15091;O15091-3;A0A0A0MTQ0	Mitochondrial ribonuclease P protein 3	KIAA0391	sp|O15091-4|MRPP3_HUMAN Isoform 4 of Mitochondrial ribonuclease P catalytic subunit OS=Homo sapiens OX=9606 GN=KIAA0391;sp|O15091-2|MRPP3_HUMAN Isoform 2 of Mitochondrial ribonuclease P catalytic subunit OS=Homo sapiens OX=9606 GN=KIAA0391;sp|O15091|MRPP3_	0.450308	0.336345
1540	B4DHJ9;Q15386;Q15386-3;Q15386-2	Ubiquitin-protein ligase E3C	UBE3C	tr|B4DHJ9|B4DHJ9_HUMAN cDNA FLJ61262, highly similar to Ubiquitin-protein ligase E3C OS=Homo sapiens OX=9606 PE=2 SV=1;sp|Q15386|UBE3C_HUMAN Ubiquitin-protein ligase E3C OS=Homo sapiens OX=9606 GN=UBE3C PE=1 SV=3;sp|Q15386-3|UBE3C_HUMAN Isoform 3 of Ubiqui	1.16918	0.865166
1025	A0A2P9AK13			tr|A0A2P9AK13|A0A2P9AK13_HUMAN Transcription termination factor OS=Homo sapiens OX=9606 GN=rho PE=3 SV=1	19.5218	0.60206
167	A0A024R277;O15269;Q6NUL7;A0A2R8Y4S0;A0A2R8Y6A2;B4DR90;Q59EQ4;O15269-2	Serine palmitoyltransferase 1	SPTLC1	tr|A0A024R277|A0A024R277_HUMAN Serine palmitoyltransferase, long chain base subunit 1, isoform CRA_a OS=Homo sapiens OX=9606 GN=SPTLC1 PE=4 SV=1;sp|O15269|SPTC1_HUMAN Serine palmitoyltransferase 1 OS=Homo sapiens OX=9606 GN=SPTLC1 PE=1 SV=1;tr|Q6NUL7|Q6NUL	20.1893	0.366935
2810	Q541A5;Q92890;Q92890-1;B4E3I3;Q92890-3;B7Z9N3;C9J6N9;C9IZG3;C9JNP9	Ubiquitin fusion degradation protein 1 homolog	ufd1;UFD1L	tr|Q541A5|Q541A5_HUMAN Ubiquitin fusion degradation 1 like (Yeast), isoform CRA_b OS=Homo sapiens OX=9606 GN=UFD1L PE=2 SV=1;sp|Q92890|UFD1_HUMAN Ubiquitin recognition factor in ER-associated degradation protein 1 OS=Homo sapiens OX=9606 GN=UFD1 PE=1 SV=3;	-0.185455	0.33969
2507	P54709;D3DNF9;C9JXZ1;C9JA36;P54709-2;H7C547;F8WBY4;Q58I18	Sodium/potassium-transporting ATPase subunit beta-3	ATP1B3	sp|P54709|AT1B3_HUMAN Sodium/potassium-transporting ATPase subunit beta-3 OS=Homo sapiens OX=9606 GN=ATP1B3 PE=1 SV=1;tr|D3DNF9|D3DNF9_HUMAN Sodium/potassium-transporting ATPase subunit beta OS=Homo sapiens OX=9606 GN=ATP1B3 PE=3 SV=1;tr|C9JXZ1|C9JXZ1_HUMA	0.178728	0.314717
1289	A8KA19;O43592;A0A024RB67;F8WDU6;F5GYW6;F5GZM3	Exportin-T	XPOT	tr|A8KA19|A8KA19_HUMAN cDNA FLJ75831, highly similar to Homo sapiens exportin, tRNA (nuclear export receptor for tRNAs) (XPOT), mRNA OS=Homo sapiens OX=9606 PE=2 SV=1;sp|O43592|XPOT_HUMAN Exportin-T OS=Homo sapiens OX=9606 GN=XPOT PE=1 SV=2;tr|A0A024RB67|A	-1.2604	0.660414
1538	E7ETU9;B4DHG3;O00469;O00469-2;Q96AR9;O00469-3;C9JXZ0	Procollagen-lysine,2-oxoglutarate 5-dioxygenase 2	PLOD2	tr|E7ETU9|E7ETU9_HUMAN Procollagen-lysine,2-oxoglutarate 5-dioxygenase 2 OS=Homo sapiens OX=9606 GN=PLOD2 PE=1 SV=1;tr|B4DHG3|B4DHG3_HUMAN cDNA FLJ55329, highly similar to Procollagen-lysine,2-oxoglutarate5-dioxygenase 2 OS=Homo sapiens OX=9606 PE=2 SV=1;s	19.986	0.766546
3087	Q8WUY1;B4DWJ7;H0YAR9	Protein THEM6	THEM6	sp|Q8WUY1|THEM6_HUMAN Protein THEM6 OS=Homo sapiens OX=9606 GN=THEM6 PE=1 SV=2;tr|B4DWJ7|B4DWJ7_HUMAN cDNA FLJ54968 OS=Homo sapiens OX=9606 PE=2 SV=1	20.3117	1.22078
1646	B7ZAX9;B4DZC0;O60264;Q4W5H1;Q4W5G3	SWI/SNF-related matrix-associated actin-dependent regulator of chromatin subfamily A member 5	SMARCA5	tr|B7ZAX9|B7ZAX9_HUMAN cDNA, FLJ79343, highly similar to SWI/SNF-related matrix-associated actin-dependent regulator of chromatin subfamily A member 5 OS=Homo sapiens OX=9606 PE=2 SV=1;tr|B4DZC0|B4DZC0_HUMAN cDNA FLJ51771, highly similar to SWI/SNF-related	3.04234	0.54505
1491	B3KWI6;Q96E22	Dehydrodolichyl diphosphate syntase complex subunit NUS1	NUS1	tr|B3KWI6|B3KWI6_HUMAN cDNA FLJ43129 fis, clone CTONG3005648 OS=Homo sapiens OX=9606 PE=2 SV=1;sp|Q96E22|NGBR_HUMAN Dehydrodolichyl diphosphate synthase complex subunit NUS1 OS=Homo sapiens OX=9606 GN=NUS1 PE=1 SV=1	2.94221	1.52754
1170	A8CG34;A8CG34-2;Q96HA1-2;Q96HA1-3;B4DET5;A6NF01;C9JER0;C9J370;A0A0J9YWR1;B4DDR5;Q6PJE2-5;Q6PJE2;A8MY32;L0R526;C9JFL1	Nuclear envelope pore membrane protein POM 121C	POM121C	sp|A8CG34|P121C_HUMAN Nuclear envelope pore membrane protein POM 121C OS=Homo sapiens OX=9606 GN=POM121C PE=1 SV=3;sp|A8CG34-2|P121C_HUMAN Isoform 2 of Nuclear envelope pore membrane protein POM 121C OS=Homo sapiens OX=9606 GN=POM121C	-0.931988	0.326429
385	F8W9S7;A0A024R875;A0A024R862;A0A024R8A2;Q14C86-3;Q14C86-4;Q14C86-5;Q14C86-2;Q14C86;Q14C86-6;B3KTX2;B3KN67;B0QZ65;B4DGD8;C9IZ08;B4DK42;A0A0A0MQV8;H0Y7I9;H0Y4E7;B3KMM3;C9IZX9	GTPase-activating protein and VPS9 domain-containing protein 1	GAPVD1	tr|F8W9S7|F8W9S7_HUMAN GTPase-activating protein and VPS9 domain-containing protein 1 OS=Homo sapiens OX=9606 GN=GAPVD1 PE=1 SV=1;tr|A0A024R875|A0A024R875_HUMAN GTPase activating protein and VPS9 domains 1, isoform CRA_a OS=Homo sapiens OX=9606 GN=GAPVD1 P	-0.46866	0.377027
2160	O43491;Q6R5J7;E9PMV8;E9PK52;E9PHY5;O43491-4;Q6ZSX4;E9PMG5;B4DJ76;H0Y5B0;Q59FD8;E9PII3;O43491-2;O43491-3;E9PPC9;E9PQN0;O60642;E9PRG1;E9PIG0;Q9UG62;E9PQD2;Q9H1C6;E9PN54;I6L9B1;A0A2R8Y5B3	Band 4.1-like protein 2	EPB41L2	sp|O43491|E41L2_HUMAN Band 4.1-like protein 2 OS=Homo sapiens OX=9606 GN=EPB41L2 PE=1 SV=1;tr|Q6R5J7|Q6R5J7_HUMAN 4.1G isoform OS=Homo sapiens OX=9606 GN=EPB41L2 PE=1 SV=1;tr|E9PMV8|E9PMV8_HUMAN Band 4.1-like protein 2 (Fragment) OS=Homo sapiens OX=9606 GN	20.7731	1.43218
3171	Q99650;Q99650-2;B4E1W9;H0Y8W9;H0YAD1	Oncostatin-M-specific receptor subunit beta	OSMR	sp|Q99650|OSMR_HUMAN Oncostatin-M-specific receptor subunit beta OS=Homo sapiens OX=9606 GN=OSMR PE=1 SV=1	1.95275	0.949854
2768	Q27J81-2;Q27J81;A0A0A0MQU1;Q27J81-3	Inverted formin-2	INF2	sp|Q27J81-2|INF2_HUMAN Isoform 2 of Inverted formin-2 OS=Homo sapiens OX=9606 GN=INF2;sp|Q27J81|INF2_HUMAN Inverted formin-2 OS=Homo sapiens OX=9606 GN=INF2 PE=1 SV=2;tr|A0A0A0MQU1|A0A0A0MQU1_HUMAN Inverted formin-2 (Fragment) OS=Homo sapiens OX=9606 GN=IN	19.598	0.586498
617	B4DSV7;A0A0S2Z3B5;A0A0S2Z3J7;Q14205;E7EQR9;F5GZY3;E7EQS5;A1L0U9;F8VX32;E7ESB2;A7E212;H0Y304;Q59HC3;A0A087WV90;E9PDN5;A0A087WTU7;A0A075B6G3;P11532-10;P11532-9;P11532-8;P11532-7;P11532-5;P11532-6;P11532-3;P11532-2;P11532-4;P11532;A0A0S2Z3B2;H0Y3E8	Dystrophin	dystrophin;DMD	tr|B4DSV7|B4DSV7_HUMAN Dystrophin isoform 4 OS=Homo sapiens OX=9606 GN=DMD PE=2 SV=1;tr|A0A0S2Z3B5|A0A0S2Z3B5_HUMAN Dystrophin isoform 2 OS=Homo sapiens OX=9606 GN=DMD PE=2 SV=1;tr|A0A0S2Z3J7|A0A0S2Z3J7_HUMAN Dystrophin isoform 1 (Fragment) OS=Homo sapiens	20.3778	1.28075
2627	Q06787-8;Q59GC1;R9WQY1;A8MQB8;G3V0J0;X5D907;Q06787-6;Q06787-2;Q06787-5;Q06787-9;R9WPL0;A0A087WXI3;X5DQX7;Q06787-11;Q06787-4;Q06787-7;Q06787-3;Q06787;Q06787-10;R9WNI0;W5ZQ92;B4DFH8;B4DZ17;A0A0K0MJ24;Q8IXW7;A0A087WWR6;A0A087WY29	Fragile X mental retardation protein 1	FMR1	sp|Q06787-8|FMR1_HUMAN Isoform 8 of Synaptic functional regulator FMR1 OS=Homo sapiens OX=9606 GN=FMR1;tr|Q59GC1|Q59GC1_HUMAN Fragile X mental retardation 1 variant (Fragment) OS=Homo sapiens OX=9606 PE=2 SV=1;tr|R9WQY1|R9WQY1_HUMAN Fragile X mental retard	-0.973129	1.13271
3249	Q9H857-3;Q9H857-2;Q9H857-4;Q9H857;H7C519;H7C4G8;C9J036	5-nucleotidase domain-containing protein 2	NT5DC2	sp|Q9H857-3|NT5D2_HUMAN Isoform 3 of 5-nucleotidase domain-containing protein 2 OS=Homo sapiens OX=9606 GN=NT5DC2;sp|Q9H857-2|NT5D2_HUMAN Isoform 2 of 5-nucleotidase domain-containing protein 2 OS=Homo sapiens OX=9606 GN=NT5DC2;sp|Q9H857-4|NT5D2_HUMAN Is	0.908303	0.537289
1193	A8K379;Q6NUK7;P07948-2;P07948;B4DQ79;E5RJ37	Non-specific protein-tyrosine kinase;Tyrosine-protein kinase Lyn	LYN	tr|A8K379|A8K379_HUMAN Tyrosine-protein kinase OS=Homo sapiens OX=9606 PE=2 SV=1;tr|Q6NUK7|Q6NUK7_HUMAN Tyrosine-protein kinase (Fragment) OS=Homo sapiens OX=9606 GN=LYN PE=2 SV=1;sp|P07948-2|LYN_HUMAN Isoform 2 of Tyrosine-protein kinase Lyn OS=Homo sapie	19.61	0.60206
2156	O43390-2;Q6MZS5;O43390-4	Heterogeneous nuclear ribonucleoprotein R	HNRNPR;DKFZp686A13234	sp|O43390-2|HNRPR_HUMAN Isoform 2 of Heterogeneous nuclear ribonucleoprotein R OS=Homo sapiens OX=9606 GN=HNRNPR;tr|Q6MZS5|Q6MZS5_HUMAN Uncharacterized protein DKFZp686A13234 (Fragment) OS=Homo sapiens OX=9606 GN=DKFZp686A13234 PE=2 SV=1;sp|O43390-4|HNRPR_	-0.777159	1.14985
74	A0A024R040;P55809;Q6IAV5;E9PDW2;B7Z609;A1E286;Q9H7N8;B3KS89;P55809-2;Q9BYC2	Succinyl-CoA:3-ketoacid-coenzyme A transferase;Succinyl-CoA:3-ketoacid coenzyme A transferase 1, mitochondrial	OXCT1;OXCT	tr|A0A024R040|A0A024R040_HUMAN Succinyl-CoA:3-ketoacid-coenzyme A transferase OS=Homo sapiens OX=9606 GN=OXCT1 PE=3 SV=1;sp|P55809|SCOT1_HUMAN Succinyl-CoA:3-ketoacid coenzyme A transferase 1, mitochondrial OS=Homo sapiens OX=9606 GN=OXCT1 PE=1 SV=1;tr|Q6I	19.6122	0.60206
852	A0A0S2Z4R1;P54577;A0A0C4DGZ5	Tyrosine--tRNA ligase, cytoplasmic;Tyrosine--tRNA ligase, cytoplasmic, N-terminally processed;Tyrosine--tRNA ligase	YARS	tr|A0A0S2Z4R1|A0A0S2Z4R1_HUMAN Tyrosine--tRNA ligase (Fragment) OS=Homo sapiens OX=9606 GN=YARS PE=2 SV=1;sp|P54577|SYYC_HUMAN Tyrosine--tRNA ligase, cytoplasmic OS=Homo sapiens OX=9606 GN=YARS PE=1 SV=4;tr|A0A0C4DGZ5|A0A0C4DGZ5_HUMAN Tyrosine--tRNA ligase	20.5524	0.500628
2700	Q14257;Q14257-2;A8MXP8;H0YL43	Reticulocalbin-2	RCN2	sp|Q14257|RCN2_HUMAN Reticulocalbin-2 OS=Homo sapiens OX=9606 GN=RCN2 PE=1 SV=1;sp|Q14257-2|RCN2_HUMAN Isoform 2 of Reticulocalbin-2 OS=Homo sapiens OX=9606 GN=RCN2;tr|A8MXP8|A8MXP8_HUMAN Reticulocalbin-2 OS=Homo sapiens OX=9606 GN=RCN2 PE=1 SV=1	-1.6843	0.814549
2671	X5D8Y5;Q13363-2;Q13363;E9PGB1;E7ESU7;D6RAX2;E7EPF8;X5D7T7;Q4KMQ8;Q9NSY3;E7EUB3;H0Y8U5;H0Y8W7;Q5SQP8;P56545;P56545-3;P56545-2	C-terminal-binding protein 1	CTBP1	tr|X5D8Y5|X5D8Y5_HUMAN C-terminal binding protein 1 isoform C (Fragment) OS=Homo sapiens OX=9606 GN=CTBP1 PE=2 SV=1;sp|Q13363-2|CTBP1_HUMAN Isoform 2 of C-terminal-binding protein 1 OS=Homo sapiens OX=9606 GN=CTBP1;sp|Q13363|CTBP1_HUMAN C-terminal-binding	20.363	1.19423
2019	I3L1H5;Q9BZG8;B2RA29;Q9BZG8-3;Q9BZG8-2;B3KQW7;B4DNK0;I3L3X9;U3KQN3;A0A0A0MTR4	Diphthamide biosynthesis protein 1	DPH1	tr|I3L1H5|I3L1H5_HUMAN 2-(3-amino-3-carboxypropyl)histidine synthase subunit 1 (Fragment) OS=Homo sapiens OX=9606 GN=DPH1 PE=1 SV=1;sp|Q9BZG8|DPH1_HUMAN 2-(3-amino-3-carboxypropyl)histidine synthase subunit 1 OS=Homo sapiens OX=9606 GN=DPH1 PE=1 SV=2;tr|B2	19.7774	0.659902
2706	Q14573;Q59ES2;A6H8K3;Q14571-2	Inositol 1,4,5-trisphosphate receptor type 3	ITPR3	sp|Q14573|ITPR3_HUMAN Inositol 1,4,5-trisphosphate receptor type 3 OS=Homo sapiens OX=9606 GN=ITPR3 PE=1 SV=2;tr|Q59ES2|Q59ES2_HUMAN Inositol 1,4,5-trisphosphate receptor type 3 variant (Fragment) OS=Homo sapiens OX=9606 PE=2 SV=1;tr|A6H8K3|A6H8K3_HUMAN IT	0.836443	0.359603
222	A0A024R3W5;Q9ULF5;Q9ULF5-2;E7ENT5;E7EV45	Zinc transporter ZIP10	SLC39A10	tr|A0A024R3W5|A0A024R3W5_HUMAN Solute carrier family 39 (Zinc transporter), member 10, isoform CRA_a OS=Homo sapiens OX=9606 GN=SLC39A10 PE=4 SV=1;sp|Q9ULF5|S39AA_HUMAN Zinc transporter ZIP10 OS=Homo sapiens OX=9606 GN=SLC39A10 PE=1 SV=2	3.88422	0.767235
1675	B5BTZ6;P40763-3;P40763-2;P40763;G8JLH9;B7ZA24;B4DVR6;B4DNP0;K7EP08	Signal transducer and activator of transcription;Signal transducer and activator of transcription 3	STAT3	tr|B5BTZ6|B5BTZ6_HUMAN Signal transducer and activator of transcription OS=Homo sapiens OX=9606 GN=STAT3 PE=2 SV=1;sp|P40763-3|STAT3_HUMAN Isoform 3 of Signal transducer and activator of transcription 3 OS=Homo sapiens OX=9606 GN=STAT3;sp|P40763-2|STAT3_HU	-0.682434	0.316099
1926	F6RFD5;V9HWA6;P60981;B7Z9M9;P60981-2	Destrin	DSTN;HEL32	tr|F6RFD5|F6RFD5_HUMAN Destrin OS=Homo sapiens OX=9606 GN=DSTN PE=1 SV=1;tr|V9HWA6|V9HWA6_HUMAN Epididymis luminal protein 32 OS=Homo sapiens OX=9606 GN=HEL32 PE=2 SV=1;sp|P60981|DEST_HUMAN Destrin OS=Homo sapiens OX=9606 GN=DSTN PE=1 SV=3;tr|B7Z9M9|B7Z9M9	23.0927	0.924219
1636	B4DXU3;Q15785;Q6ZPD0	Mitochondrial import receptor subunit TOM34	TOMM34	tr|B4DXU3|B4DXU3_HUMAN cDNA FLJ54989, highly similar to Mitochondrial import receptor subunit TOM34 OS=Homo sapiens OX=9606 PE=2 SV=1;sp|Q15785|TOM34_HUMAN Mitochondrial import receptor subunit TOM34 OS=Homo sapiens OX=9606 GN=TOMM34 PE=1 SV=2	20.3065	1.04055
2609	Q01082-3	Spectrin beta chain, non-erythrocytic 1	SPTBN1	sp|Q01082-3|SPTB2_HUMAN Isoform 2 of Spectrin beta chain, non-erythrocytic 1 OS=Homo sapiens OX=9606 GN=SPTBN1	1.8312	2.38367
1442	B3KMV8;O75746;O75746-2;F8W9J0;H0YFB2;B4DGK6	Calcium-binding mitochondrial carrier protein Aralar1	SLC25A12	tr|B3KMV8|B3KMV8_HUMAN cDNA FLJ12766 fis, clone NT2RP2001520, highly similar to Calcium-binding mitochondrial carrier protein Aralar1 OS=Homo sapiens OX=9606 PE=2 SV=1;sp|O75746|CMC1_HUMAN Calcium-binding mitochondrial carrier protein Aralar1 OS=Homo sapie	-0.0853754	0.727954
931	Q59EK6;A0A140VJY2;Q12931-2;Q12931;Q9BV61;Q53G55;Q53FS6;Q5CAQ4;I3L0K7;K0A7K7;Q8N9Z3;I3L239;I3L253;I3L2D5	Heat shock protein 75 kDa, mitochondrial	TRAP1	tr|Q59EK6|Q59EK6_HUMAN TNF receptor-associated protein 1 variant (Fragment) OS=Homo sapiens OX=9606 PE=3 SV=1;tr|A0A140VJY2|A0A140VJY2_HUMAN Testicular tissue protein Li 209 OS=Homo sapiens OX=9606 PE=2 SV=1;sp|Q12931-2|TRAP1_HUMAN Isoform 2 of Heat shock	20.0501	0.782709
2679	Q13505-3;Q13505;A0A0C4DFQ1;Q13505-2	Metaxin-1	MTX1	sp|Q13505-3|MTX1_HUMAN Isoform 3 of Metaxin-1 OS=Homo sapiens OX=9606 GN=MTX1;sp|Q13505|MTX1_HUMAN Metaxin-1 OS=Homo sapiens OX=9606 GN=MTX1 PE=1 SV=3	20.4812	0.754603
1325	B1AL05;Q8N983-2;Q8N983;H0Y6Y8;Q8N983-3;Q8N983-6;Q8N983-7;H0YBU8;M0R051	39S ribosomal protein L43, mitochondrial	MRPL43	tr|B1AL05|B1AL05_HUMAN 39S ribosomal protein L43, mitochondrial OS=Homo sapiens OX=9606 GN=MRPL43 PE=1 SV=1;sp|Q8N983-2|RM43_HUMAN Isoform 2 of 39S ribosomal protein L43, mitochondrial OS=Homo sapiens OX=9606 GN=MRPL43;sp|Q8N983|RM43_HUMAN 39S ribosomal pr	19.704	0.60206
721	F5HRF8;A0A0A0MRW7;Q7Z2E3-9;Q7Z2E3-11;Q7Z2E3-8;Q7Z2E3-7;Q7Z2E3;F8W6G5;C9JZ40;Q7Z2E3-3;Q7Z2E3-5;Q7Z2E3-10;Q7Z2E3-13;Q7Z2E3-4;C9J8U3;Q7Z2E3-6;Q7Z2E3-2;F8WBD6;E7EUY4;F8WBM3;Q6JV79;E7EVB7;Q7Z2E3-12	Aprataxin	APTX	tr|F5HRF8|F5HRF8_HUMAN Aprataxin (Fragment) OS=Homo sapiens OX=9606 GN=APTX PE=2 SV=1;tr|A0A0A0MRW7|A0A0A0MRW7_HUMAN Aprataxin OS=Homo sapiens OX=9606 GN=APTX PE=1 SV=1;sp|Q7Z2E3-9|APTX_HUMAN Isoform 9 of Aprataxin OS=Homo sapiens OX=9606 GN=APTX;sp|Q7Z2E3	21.1516	1.62908
2413	P35221;P35221-2;G3XAM7;B4E2G8;B4DKT9;B4DU00;E5RG03;E5RIB1;P35221-3;E5RGY6;B3KSR8;E5RHV7;E5RJ41;E5RJL0;E5RIE0;F6KRI5;A0A0A0MRI5;Q49AD3;P26232-4;P26232-6;E5RFM3;E5RFM5;E5RJP7;E5RGD2;E5RGY7;B7Z259;A0A0A0MTJ6;A8K141;Q9UI47	Catenin alpha-1	CTNNA1	sp|P35221|CTNA1_HUMAN Catenin alpha-1 OS=Homo sapiens OX=9606 GN=CTNNA1 PE=1 SV=1;sp|P35221-2|CTNA1_HUMAN Isoform 2 of Catenin alpha-1 OS=Homo sapiens OX=9606 GN=CTNNA1;tr|G3XAM7|G3XAM7_HUMAN Catenin (Cadherin-associated protein), alpha 1, 102kDa, isoform	19.8898	0.6816
1573	Q6IAT1;B4DLV7;P50395;Q5SX87;P50395-2;V9GYF8;Q5SX90;Q5SX86;Q8TB95;B3KVE3;Q5SX91;B4DHX4;A0A0S2Z3X8;P31150	Rab GDP dissociation inhibitor beta	GDI2	tr|Q6IAT1|Q6IAT1_HUMAN Rab GDP dissociation inhibitor OS=Homo sapiens OX=9606 GN=GDI2 PE=2 SV=1;tr|B4DLV7|B4DLV7_HUMAN Rab GDP dissociation inhibitor OS=Homo sapiens OX=9606 PE=2 SV=1;sp|P50395|GDIB_HUMAN Rab GDP dissociation inhibitor beta OS=Homo sapiens	19.7309	0.60206
1043	A0A2R8Y4C1;A0A2R8Y7U5;A8MST6;A0A2U3TZI9;A0A2R8Y5W6;A0A2R8Y432;A0A2R8YCP0;A0A2R8Y7A4;Q5JTW2;Q5JTW2-3;Q5JTW2-5;Q5JTW2-2;A0A2R8Y589;A0A2R8YFB0;A0A2R8Y7M8;B7Z8H9	Centrosomal protein of 78 kDa	CEP78	tr|A0A2R8Y4C1|A0A2R8Y4C1_HUMAN Centrosomal protein of 78 kDa OS=Homo sapiens OX=9606 GN=CEP78 PE=1 SV=1;tr|A0A2R8Y7U5|A0A2R8Y7U5_HUMAN Centrosomal protein of 78 kDa OS=Homo sapiens OX=9606 GN=CEP78 PE=1 SV=1;tr|A8MST6|A8MST6_HUMAN Centrosomal protein of 78	21.3124	0.998239
3128	Q96BW9-3;Q96BW9;Q96BW9-2;A0A0G2JQ92;B4E101;G3V0F3	Phosphatidate cytidylyltransferase, mitochondrial	TAMM41	sp|Q96BW9-3|TAM41_HUMAN Isoform 3 of Phosphatidate cytidylyltransferase, mitochondrial OS=Homo sapiens OX=9606 GN=TAMM41;sp|Q96BW9|TAM41_HUMAN Phosphatidate cytidylyltransferase, mitochondrial OS=Homo sapiens OX=9606 GN=TAMM41 PE=1 SV=2;sp|Q96BW9-2|TAM41_H	21.4112	0.947367
3282	Q9NTX5-3;Q9NTX5-6;Q9NTX5-2;Q9NTX5;H0Y5L2	Ethylmalonyl-CoA decarboxylase	ECHDC1	sp|Q9NTX5-3|ECHD1_HUMAN Isoform 3 of Ethylmalonyl-CoA decarboxylase OS=Homo sapiens OX=9606 GN=ECHDC1;sp|Q9NTX5-6|ECHD1_HUMAN Isoform 6 of Ethylmalonyl-CoA decarboxylase OS=Homo sapiens OX=9606 GN=ECHDC1;sp|Q9NTX5-2|ECHD1_HUMAN Isoform 2 of Ethylmalonyl-Co	-0.270535	0.414403
3401	Q9Y3F4;Q9Y3F4-2;B0AZV0;H0YH33	Serine-threonine kinase receptor-associated protein	STRAP	sp|Q9Y3F4|STRAP_HUMAN Serine-threonine kinase receptor-associated protein OS=Homo sapiens OX=9606 GN=STRAP PE=1 SV=1;sp|Q9Y3F4-2|STRAP_HUMAN Isoform 2 of Serine-threonine kinase receptor-associated protein OS=Homo sapiens OX=9606 GN=STRAP;tr|B0AZV0|B0AZV0_	-0.762551	0.730448
2192	O75367-2;O75367-3;O75367;D6RCF2;B4DJC3;Q59FH0;Q9HA11;A0A024QZP6;Q9P0M6;Q5SQT3	Core histone macro-H2A.1;Histone H2A	H2AFY	sp|O75367-2|H2AY_HUMAN Isoform 1 of Core histone macro-H2A.1 OS=Homo sapiens OX=9606 GN=H2AFY;sp|O75367-3|H2AY_HUMAN Isoform 3 of Core histone macro-H2A.1 OS=Homo sapiens OX=9606 GN=H2AFY;sp|O75367|H2AY_HUMAN Core histone macro-H2A.1 OS=Homo sapiens OX=960	3.68519	0.614847
138	A0A024R1K8;Q15459;Q15459-2;B4E091;F8WB66;H7C1L2;F8WC79	Splicing factor 3A subunit 1	SF3A1	tr|A0A024R1K8|A0A024R1K8_HUMAN Splicing factor 3a, subunit 1, 120kDa, isoform CRA_a OS=Homo sapiens OX=9606 GN=SF3A1 PE=4 SV=1;sp|Q15459|SF3A1_HUMAN Splicing factor 3A subunit 1 OS=Homo sapiens OX=9606 GN=SF3A1 PE=1 SV=1;sp|Q15459-2|SF3A1_HUMAN Isoform 2 o	-2.58571	1.28812
523	A0A024RBB2;O60669;B4DWX9;F8W0N3;F8W0U4;F8VXG4;F8VYZ2;F8VVU7;F8VQS4;F8VS95;F8W1M4	Monocarboxylate transporter 2	SLC16A7	tr|A0A024RBB2|A0A024RBB2_HUMAN Solute carrier family 16 (Monocarboxylic acid transporters), member 7, isoform CRA_a OS=Homo sapiens OX=9606 GN=SLC16A7 PE=4 SV=1;sp|O60669|MOT2_HUMAN Monocarboxylate transporter 2 OS=Homo sapiens OX=9606 GN=SLC16A7 PE=1 SV=2	1.92016	1.55246
1544	B4DI61;Q6FI18;O00622;Q9UID7;Q53FA4	Protein CYR61	CYR61	tr|B4DI61|B4DI61_HUMAN cDNA FLJ58182, highly similar to Protein CYR61 OS=Homo sapiens OX=9606 PE=2 SV=1;tr|Q6FI18|Q6FI18_HUMAN CYR61 protein OS=Homo sapiens OX=9606 GN=CYR61 PE=1 SV=1;sp|O00622|CYR61_HUMAN Protein CYR61 OS=Homo sapiens OX=9606 GN=CYR61 PE=	2.63308	0.822141
1990	H3BPE7		FUS	tr|H3BPE7|H3BPE7_HUMAN RNA-binding protein FUS OS=Homo sapiens OX=9606 GN=FUS PE=1 SV=1	0.191013	0.394669
103	A0A024R0R6;Q92797;B7Z6F7;A0A087WUE9;Q4LE61;M0R3C7;Q92797-2;M0QXP5;M0R033;O75402;M0R180;M0R1C2	Symplekin	SYMPK;SYMPK variant protein	tr|A0A024R0R6|A0A024R0R6_HUMAN Symplekin, isoform CRA_a OS=Homo sapiens OX=9606 GN=SYMPK PE=4 SV=1;sp|Q92797|SYMPK_HUMAN Symplekin OS=Homo sapiens OX=9606 GN=SYMPK PE=1 SV=2;tr|B7Z6F7|B7Z6F7_HUMAN cDNA FLJ61705, highly similar to Symplekin OS=Homo sapiens	-2.71686	1.75202
1608	B4DSQ5;F5H365;Q15436;B4DF60;B4E0Q9;Q15436-2;G3V5X8;G3V4Q2;G3V4V1;G3V1W4;G3V3G5;G3V2R6;G3V5K1	Protein transport protein Sec23A	SEC23A	tr|B4DSQ5|B4DSQ5_HUMAN Protein transport protein SEC23 OS=Homo sapiens OX=9606 PE=2 SV=1;tr|F5H365|F5H365_HUMAN Protein transport protein SEC23 OS=Homo sapiens OX=9606 GN=SEC23A PE=1 SV=1;sp|Q15436|SC23A_HUMAN Protein transport protein Sec23A OS=Homo sapie	-0.337371	0.804417
1050	A0A2R8Y7M3;B0YJ88;A0A2R8Y5S7;P35241;P35241-5;Q6PKD3;Q05CU6;P35241-4;B7Z2S7;Q9UJZ6;Q9UK20;Q9UJU1;Q9UJZ2;Q9UJZ8;E9PQ82;E9PNV3;Q9UJZ7;A0A2R8Y5P0;P35241-3;P35241-2	Radixin	RDX	tr|A0A2R8Y7M3|A0A2R8Y7M3_HUMAN Radixin OS=Homo sapiens OX=9606 GN=RDX PE=1 SV=1;tr|B0YJ88|B0YJ88_HUMAN Radixin OS=Homo sapiens OX=9606 GN=RDX PE=2 SV=1;tr|A0A2R8Y5S7|A0A2R8Y5S7_HUMAN Radixin OS=Homo sapiens OX=9606 GN=RDX PE=1 SV=1;sp|P35241|RADI_HUMAN Rad	2.66379	0.881154
534	B3KMP2;A8KAQ7;A5D8X2;A0A024RBJ3;Q9UJX3-2;Q9UJX3;Q2M2R1;Q4KMX6;H0YIX7	Anaphase-promoting complex subunit 7	ANAPC7	tr|B3KMP2|B3KMP2_HUMAN cDNA FLJ11747 fis, clone HEMBA1005530, highly similar to Anaphase-promoting complex subunit 7 OS=Homo sapiens OX=9606 PE=2 SV=1;tr|A8KAQ7|A8KAQ7_HUMAN ANAPC7 protein OS=Homo sapiens OX=9606 GN=ANAPC7 PE=2 SV=1;tr|A5D8X2|A5D8X2_HUMAN	0.891602	0.835197
3125	Q96BH1	E3 ubiquitin-protein ligase RNF25	RNF25	sp|Q96BH1|RNF25_HUMAN E3 ubiquitin-protein ligase RNF25 OS=Homo sapiens OX=9606 GN=RNF25 PE=1 SV=1	-3.1797	2.04738
286	A0A024R5D8;P43353;A0A024R5K0;P43353-2;Q59F10;A0A087X2D4;A0A087X192;Q9BUJ8;A0A087WUF8;B4DSX1;P48448;A0A087WTE0	Aldehyde dehydrogenase;Aldehyde dehydrogenase family 3 member B1	ALDH3B1	tr|A0A024R5D8|A0A024R5D8_HUMAN Aldehyde dehydrogenase OS=Homo sapiens OX=9606 GN=ALDH3B1 PE=3 SV=1;sp|P43353|AL3B1_HUMAN Aldehyde dehydrogenase family 3 member B1 OS=Homo sapiens OX=9606 GN=ALDH3B1 PE=1 SV=1;tr|A0A024R5K0|A0A024R5K0_HUMAN Aldehyde dehydrog	-0.0883748	0.393243
1440	B3KMS0;B3KY03;Q15021;E7EN77;B4E0B7;Q6ZV00;A0PJ76;F5GZK7;F5H431	Condensin complex subunit 1	NCAPD2	tr|B3KMS0|B3KMS0_HUMAN Condensin complex subunit 1 OS=Homo sapiens OX=9606 PE=2 SV=1;tr|B3KY03|B3KY03_HUMAN Condensin complex subunit 1 OS=Homo sapiens OX=9606 PE=2 SV=1;sp|Q15021|CND1_HUMAN Condensin complex subunit 1 OS=Homo sapiens OX=9606 GN=NCAPD2 PE=	0.138113	0.582591
2639	Q09666;Q6ZQN2;B4DTV0;Q8N274;Q13727;E9PJZ0;E9PKR9;E9PJC6;E9PLK4;Q96EC4;Q9BVU3;Q09666-2;E9PQE3	Neuroblast differentiation-associated protein AHNAK	AHNAK	sp|Q09666|AHNK_HUMAN Neuroblast differentiation-associated protein AHNAK OS=Homo sapiens OX=9606 GN=AHNAK PE=1 SV=2	-2.6155	1.00489
1853	E5KTI5;P78549-3;P78549-2;P78549;H3BRL9;H3BPD5	Endonuclease III-like protein 1	NTHL1	tr|E5KTI5|E5KTI5_HUMAN Endonuclease III-like protein 1 OS=Homo sapiens OX=9606 GN=NTHL1 PE=3 SV=1;sp|P78549-3|NTH_HUMAN Isoform 3 of Endonuclease III-like protein 1 OS=Homo sapiens OX=9606 GN=NTHL1;sp|P78549-2|NTH_HUMAN Isoform 2 of Endonuclease III-like p	-1.96989	1.07749
2926	Q6QNY7;Q6QNY6;Q6QNY5;Q9Y223;Q9Y223-2;Q9Y223-4;Q9Y223-3;Q9Y223-5;B7Z5W2	Bifunctional UDP-N-acetylglucosamine 2-epimerase/N-acetylmannosamine kinase;UDP-N-acetylglucosamine 2-epimerase (hydrolyzing);N-acetylmannosamine kinase	GNE	tr|Q6QNY7|Q6QNY7_HUMAN UDP-N-acetylglucosamine-2-epimerase / N-acetylmannosamine kinase OS=Homo sapiens OX=9606 GN=GNE PE=2 SV=1;tr|Q6QNY6|Q6QNY6_HUMAN UDP-N-acetylglucosamine-2-epimerase / N-acetylmannosamine kinase OS=Homo sapiens OX=9606 GN=GNE PE=2 SV=	-0.474387	0.64384
1724	Q8IW76;B7ZKK7;P19525-2;P19525;Q05CP4	Interferon-induced, double-stranded RNA-activated protein kinase	EIF2AK2	tr|Q8IW76|Q8IW76_HUMAN eIF2AK2 protein (Fragment) OS=Homo sapiens OX=9606 GN=EIF2AK2 PE=2 SV=1;tr|B7ZKK7|B7ZKK7_HUMAN eIF2AK2 protein OS=Homo sapiens OX=9606 GN=EIF2AK2 PE=2 SV=1;sp|P19525-2|E2AK2_HUMAN Isoform 2 of Interferon-induced, double-stranded RNA-	-0.468081	0.532143
3106	Q92769-3;Q92769;B3KUJ5;Q59GB9	Histone deacetylase 2;Histone deacetylase	HDAC2	sp|Q92769-3|HDAC2_HUMAN Isoform 2 of Histone deacetylase 2 OS=Homo sapiens OX=9606 GN=HDAC2;sp|Q92769|HDAC2_HUMAN Histone deacetylase 2 OS=Homo sapiens OX=9606 GN=HDAC2 PE=1 SV=2;tr|B3KUJ5|B3KUJ5_HUMAN Histone deacetylase OS=Homo sapiens OX=9606 PE=2 SV=1	-0.612588	1.52656
3377	Q9UPT9-2;Q9UPT9;J3QS30;K7ESK0;K7ERX6;Q9NSJ7;A6NNY8	Ubiquitin carboxyl-terminal hydrolase 22	USP22	sp|Q9UPT9-2|UBP22_HUMAN Isoform 2 of Ubiquitin carboxyl-terminal hydrolase 22 OS=Homo sapiens OX=9606 GN=USP22;sp|Q9UPT9|UBP22_HUMAN Ubiquitin carboxyl-terminal hydrolase 22 OS=Homo sapiens OX=9606 GN=USP22 PE=1 SV=2	2.42297	0.855268
2012	H7C3T4;V9HW63;Q13162;A6NJJ0	Peroxiredoxin-4	PRDX4;HEL-S-97n	tr|H7C3T4|H7C3T4_HUMAN Peroxiredoxin-4 (Fragment) OS=Homo sapiens OX=9606 GN=PRDX4 PE=1 SV=1;tr|V9HW63|V9HW63_HUMAN Epididymis secretory sperm binding protein Li 97n OS=Homo sapiens OX=9606 GN=HEL-S-97n PE=2 SV=1;sp|Q13162|PRDX4_HUMAN Peroxiredoxin-4 OS=Ho	-0.130671	0.554092
404	A0A024R8D5;O14684	Prostaglandin E synthase	hCG_30600;PTGES	tr|A0A024R8D5|A0A024R8D5_HUMAN HCG30600, isoform CRA_a OS=Homo sapiens OX=9606 GN=hCG_30600 PE=4 SV=1;sp|O14684|PTGES_HUMAN Prostaglandin E synthase OS=Homo sapiens OX=9606 GN=PTGES PE=1 SV=2	21.5772	0.92257
360	A8K8B9;A0A024R7J0;P17612-2;P17612;K7ERP6;Q15136;B7Z708	cAMP-dependent protein kinase catalytic subunit alpha	PRKACA;KIN27	tr|A8K8B9|A8K8B9_HUMAN cDNA FLJ77368, highly similar to Homo sapiens protein kinase, cAMP-dependent, catalytic, alpha (PRKACA), transcript variant 2, mRNA OS=Homo sapiens OX=9606 PE=2 SV=1;tr|A0A024R7J0|A0A024R7J0_HUMAN Protein kinase, cAMP-dependent, cata	0.31481	0.566826
1895	E9PLK3;P55786;B7Z4B2;B7Z899;P55786-2;B3KU93;B3KTP2;B7Z1H4;A6NEC2;B7Z1V9;B7Z6T6;E9PP11;E9PJY4;E9PPD4;H0YDG0;A6NEC2-2;A6NEC2-3;H0YCQ5;E9PJF9;E9PJ74;B4DGH6;E9PRQ5;E9PPZ2	Puromycin-sensitive aminopeptidase	NPEPPS	tr|E9PLK3|E9PLK3_HUMAN Aminopeptidase OS=Homo sapiens OX=9606 GN=NPEPPS PE=1 SV=1;sp|P55786|PSA_HUMAN Puromycin-sensitive aminopeptidase OS=Homo sapiens OX=9606 GN=NPEPPS PE=1 SV=2;tr|B7Z4B2|B7Z4B2_HUMAN Aminopeptidase OS=Homo sapiens OX=9606 PE=2 SV=1;tr|	-2.98196	1.323
2495	P52272-2;P52272;A0A087X0X3;Q7KYM9;Q59ES8;M0QZM1;Q6P2D7;M0R019;B4DEG4;M0R2T0;M0R2I7;M0R0N3;M0QYQ7;M0QY96;M0R0Y6;M0QYL3;Q8TCM5	Heterogeneous nuclear ribonucleoprotein M	HNRNPM;ORF	sp|P52272-2|HNRPM_HUMAN Isoform 2 of Heterogeneous nuclear ribonucleoprotein M OS=Homo sapiens OX=9606 GN=HNRNPM;sp|P52272|HNRPM_HUMAN Heterogeneous nuclear ribonucleoprotein M OS=Homo sapiens OX=9606 GN=HNRNPM PE=1 SV=3;tr|A0A087X0X3|A0A087X0X3_HUMAN Hete	-3.35937	1.1452
2720	Q15031;E9PHM2;C9JYR8;Q9BQR0	Probable leucine--tRNA ligase, mitochondrial	LARS2	sp|Q15031|SYLM_HUMAN Probable leucine--tRNA ligase, mitochondrial OS=Homo sapiens OX=9606 GN=LARS2 PE=1 SV=2;tr|E9PHM2|E9PHM2_HUMAN Probable leucine--tRNA ligase, mitochondrial OS=Homo sapiens OX=9606 GN=LARS2 PE=1 SV=1	20.2097	0.771204
3170	Q99615;B7Z9W6;Q59EH7;A8K4T2;Q99615-2;B4DKK3;K7ESP1;K7ELJ8;K7EPP7;K7EIH8;K7EJE9;K7EK03;K7EJL5;K7EN19;K7EJV7;K7ER44	DnaJ homolog subfamily C member 7	DNAJC7	sp|Q99615|DNJC7_HUMAN DnaJ homolog subfamily C member 7 OS=Homo sapiens OX=9606 GN=DNAJC7 PE=1 SV=2;tr|B7Z9W6|B7Z9W6_HUMAN cDNA, FLJ78980, highly similar to DnaJ homolog subfamily C member 7 OS=Homo sapiens OX=9606 PE=2 SV=1;tr|Q59EH7|Q59EH7_HUMAN DnaJ (Hs	1.86553	1.87522
3084	Q9HBB9;Q8WUM5;I3L399;I3L4A4;I3L4M4;I3L1J7;E7EN12		GEMIN4	tr|Q9HBB9|Q9HBB9_HUMAN HC56 OS=Homo sapiens OX=9606 PE=4 SV=1;tr|Q8WUM5|Q8WUM5_HUMAN Gem (Nuclear organelle) associated protein 4 OS=Homo sapiens OX=9606 GN=GEMIN4 PE=2 SV=1	0.242838	0.851352
2354	P20700;E9PBF6;A0A0D9SFE5;Q6DC98;B4DZT3;A0A0D9SFY5	Lamin-B1	LMNB1	sp|P20700|LMNB1_HUMAN Lamin-B1 OS=Homo sapiens OX=9606 GN=LMNB1 PE=1 SV=2;tr|E9PBF6|E9PBF6_HUMAN Lamin-B1 OS=Homo sapiens OX=9606 GN=LMNB1 PE=1 SV=1;tr|A0A0D9SFE5|A0A0D9SFE5_HUMAN Lamin B1, isoform CRA_a OS=Homo sapiens OX=9606 GN=LMNB1 PE=1 SV=1;tr|Q6DC98	21.4849	1.09677
815	A0A0K0K1I0;P09493-10;P09493-4;A0A0S2Z4G6;D9YZV4;P09493;Q8TCG4;C9IZA2;H0YKX5;H0YKP3;P09493-6;H0YNC7;H0YL42;H0YK20;A0A087WTJ7;H0YL80;H0YKZ6;D6RGJ6;H0YLS7	Tropomyosin alpha-1 chain	TPM1	tr|A0A0K0K1I0|A0A0K0K1I0_HUMAN Epididymis secretory protein Li 265 OS=Homo sapiens OX=9606 GN=HEL-S-265 PE=2 SV=1;sp|P09493-10|TPM1_HUMAN Isoform 10 of Tropomyosin alpha-1 chain OS=Homo sapiens OX=9606 GN=TPM1;sp|P09493-4|TPM1_HUMAN Isoform 4 of Tropomyosi	20.3503	0.359215
3033	Q8N766-2;Q8N766;Q8N766-4;Q8N766-3;A0A286YEW0;H7C4E3	ER membrane protein complex subunit 1	EMC1	sp|Q8N766-2|EMC1_HUMAN Isoform 2 of ER membrane protein complex subunit 1 OS=Homo sapiens OX=9606 GN=EMC1;sp|Q8N766|EMC1_HUMAN ER membrane protein complex subunit 1 OS=Homo sapiens OX=9606 GN=EMC1 PE=1 SV=1;sp|Q8N766-4|EMC1_HUMAN Isoform 4 of ER membrane p	1.17459	0.759175
3210	Q9BYG3;B4DSM4;C9J6C5;C9J808;H7BZL0	MKI67 FHA domain-interacting nucleolar phosphoprotein	NIFK	sp|Q9BYG3|MK67I_HUMAN MKI67 FHA domain-interacting nucleolar phosphoprotein OS=Homo sapiens OX=9606 GN=NIFK PE=1 SV=1;tr|B4DSM4|B4DSM4_HUMAN cDNA FLJ57495, highly similar to MKI67 FHA domain-interacting nucleolar phosphoprotein OS=Homo sapiens OX=9606 PE=2	22.3851	0.793686
326	A0A024R6N2;Q9Y5S2;H0YLY0;Q86TR8;A0A0U1RRC3;Q86XZ8	Non-specific serine/threonine protein kinase;Serine/threonine-protein kinase MRCK beta	CDC42BPB	tr|A0A024R6N2|A0A024R6N2_HUMAN CDC42 binding protein kinase beta (DMPK-like), isoform CRA_a OS=Homo sapiens OX=9606 GN=CDC42BPB PE=3 SV=1;sp|Q9Y5S2|MRCKB_HUMAN Serine/threonine-protein kinase MRCK beta OS=Homo sapiens OX=9606 GN=CDC42BPB PE=1 SV=2;tr|H0YLY	4.72532	0.82381
1475	B3KSJ3;Q9BZI7-2;Q9BZI7;A0A087WYC8;Q0VAK7;I3XIE4;A0A1B0GVA2	Regulator of nonsense transcripts 3B	UPF3B	tr|B3KSJ3|B3KSJ3_HUMAN cDNA FLJ36409 fis, clone THYMU2010448, highly similar to Regulator of nonsense transcripts 3B OS=Homo sapiens OX=9606 PE=2 SV=1;sp|Q9BZI7-2|REN3B_HUMAN Isoform 2 of Regulator of nonsense transcripts 3B OS=Homo sapiens OX=9606 GN=UPF3	20.8022	1.62268
962	A0A1B0GWA2;A0A2R8YEL0;B7Z3Q4;O00116;B7ZAC5;Q53S12;Q53SN7;B8ZZ81;Q53SG6	Alkyldihydroxyacetonephosphate synthase, peroxisomal	AGPS	tr|A0A1B0GWA2|A0A1B0GWA2_HUMAN Alkylglycerone-phosphate synthase (Fragment) OS=Homo sapiens OX=9606 GN=AGPS PE=1 SV=1;tr|A0A2R8YEL0|A0A2R8YEL0_HUMAN Alkylglycerone-phosphate synthase (Fragment) OS=Homo sapiens OX=9606 GN=AGPS PE=1 SV=1;tr|B7Z3Q4|B7Z3Q4_HUM	1.70718	0.560504
568	A0A1U9X9D5;A0A1U9X9C8;A0A1U9X9C7;A0A1U9X9C4;A0A1U9X9C1;A0A1U9X9A3;A0A1U9X9A1;A0A024RCN6;P26640;A0A140T936;A0A140T954;A2ABF4;A0A0G2JJT9;B4DT32;A0A140T904;P26640-2	Valine--tRNA ligase	VARS	tr|A0A1U9X9D5|A0A1U9X9D5_HUMAN VARS OS=Homo sapiens OX=9606 PE=3 SV=2;tr|A0A1U9X9C8|A0A1U9X9C8_HUMAN VARS OS=Homo sapiens OX=9606 PE=1 SV=1;tr|A0A1U9X9C7|A0A1U9X9C7_HUMAN VARS OS=Homo sapiens OX=9606 PE=1 SV=1;tr|A0A1U9X9C4|A0A1U9X9C4_HUMAN VARS OS=Homo sa	3.90703	1.8718
797	B7Z2V7;A0A1B0GWF2;A0A1B0GVQ5;A0A2R8Y5D4;A0A0D9SG72;A0A1B0GTP9;P61764;P61764-2;A0A1B0GW76;B7Z1V5;A0A0D9SFQ7;A0A0D9SFW6;Q59GC9;B7Z3F4;A0A0D9SEP9;A0A0D9SEH5;A0A096LP33;A0A096LP52	Syntaxin-binding protein 1	STXBP1	tr|B7Z2V7|B7Z2V7_HUMAN cDNA FLJ54602, highly similar to Syntaxin-binding protein 1 OS=Homo sapiens OX=9606 PE=2 SV=1;tr|A0A1B0GWF2|A0A1B0GWF2_HUMAN Syntaxin-binding protein 1 OS=Homo sapiens OX=9606 GN=STXBP1 PE=1 SV=1;tr|A0A1B0GVQ5|A0A1B0GVQ5_HUMAN Syntax	0.928722	0.484328
553	A0A024RC37;Q96P16;A0A0C4DGQ6;Q96P16-3;E9PIQ9;K7EQR8;K7EP82;K7ER50;E9PQF3	Regulation of nuclear pre-mRNA domain-containing protein 1A	P15RS;RPRD1A	tr|A0A024RC37|A0A024RC37_HUMAN Uncharacterized protein OS=Homo sapiens OX=9606 GN=P15RS PE=4 SV=1;sp|Q96P16|RPR1A_HUMAN Regulation of nuclear pre-mRNA domain-containing protein 1A OS=Homo sapiens OX=9606 GN=RPRD1A PE=1 SV=1;tr|A0A0C4DGQ6|A0A0C4DGQ6_HUMAN R	0.13882	1.00542
1406	B2RD09;Q96P11-2;Q96P11;Q96P11-4;Q96P11-5;Q96P11-3;B4E119	Probable 28S rRNA (cytosine-C(5))-methyltransferase	NSUN5	tr|B2RD09|B2RD09_HUMAN cDNA, FLJ96406, highly similar to Homo sapiens NOL1/NOP2/Sun domain family, member 5 (NSUN5), transcript variant 1, mRNA OS=Homo sapiens OX=9606 PE=2 SV=1;sp|Q96P11-2|NSUN5_HUMAN Isoform 2 of Probable 28S rRNA (cytosine-C(5))-methylt	0.902712	0.898828
1820	D3DUJ0;Q8TA92;Q9Y4W6;K7EP56	AFG3-like protein 2	AFG3L2	tr|D3DUJ0|D3DUJ0_HUMAN AFG3 ATPase family gene 3-like 2 (Yeast), isoform CRA_a (Fragment) OS=Homo sapiens OX=9606 GN=AFG3L2 PE=3 SV=1;tr|Q8TA92|Q8TA92_HUMAN Similar to AFG3 ATPase family gene 3-like 2 (Yeast) (Fragment) OS=Homo sapiens OX=9606 PE=2 SV=1;sp	0.205842	0.690578
924	A0A140VJQ4;P04181;P04181-2;Q59HE2	Ornithine aminotransferase, mitochondrial;Ornithine aminotransferase, hepatic form;Ornithine aminotransferase, renal form	OAT	tr|A0A140VJQ4|A0A140VJQ4_HUMAN Ornithine aminotransferase OS=Homo sapiens OX=9606 PE=2 SV=1;sp|P04181|OAT_HUMAN Ornithine aminotransferase, mitochondrial OS=Homo sapiens OX=9606 GN=OAT PE=1 SV=1;sp|P04181-2|OAT_HUMAN Isoform 2 of Ornithine aminotransferase	1.20946	0.896155
2187	O75165;B3KN02;Q8N7A5;Q0D2M7;H0Y8Q2;H0YA63	DnaJ homolog subfamily C member 13	DNAJC13	sp|O75165|DJC13_HUMAN DnaJ homolog subfamily C member 13 OS=Homo sapiens OX=9606 GN=DNAJC13 PE=1 SV=5	0.175215	0.371454
1422	B4DNY3;B4DNW7;B4DI38;D3DPU2;B2RDY9;Q01518-2;Q01518;B4DUZ8;B4DNA3;Q5T0R7;Q5T0R6;Q5T0R5;Q5T0R4;Q5T0R3;Q5T0R2;Q5T0R1;Q5T0R9	Adenylyl cyclase-associated protein;Adenylyl cyclase-associated protein 1	CAP1	tr|B4DNY3|B4DNY3_HUMAN Adenylyl cyclase-associated protein OS=Homo sapiens OX=9606 PE=2 SV=1;tr|B4DNW7|B4DNW7_HUMAN Adenylyl cyclase-associated protein OS=Homo sapiens OX=9606 PE=2 SV=1;tr|B4DI38|B4DI38_HUMAN Adenylyl cyclase-associated protein OS=Homo sap	19.949	0.60206
3074	Q8TED1;J3KNB5	Probable glutathione peroxidase 8	GPX8	sp|Q8TED1|GPX8_HUMAN Probable glutathione peroxidase 8 OS=Homo sapiens OX=9606 GN=GPX8 PE=1 SV=2	20.8542	0.35624
3139	Q96F86;H3BPN4	Enhancer of mRNA-decapping protein 3	EDC3	sp|Q96F86|EDC3_HUMAN Enhancer of mRNA-decapping protein 3 OS=Homo sapiens OX=9606 GN=EDC3 PE=1 SV=1	0.64426	1.60122
2620	Q9H2G0;Q9BUI6;Q05086-2;Q05086-3;Q05086;A0A0D9SG77;A0A1B0GVL3;Q5W7F7;Q96GR7;A0A0D9SF91;S4R306;A0A0D9SGI3;Q9UBN9;A0A1B0GTB3;A0A0D9SG63;A0A0D9SES7	Ubiquitin-protein ligase E3A	UBE3A	tr|Q9H2G0|Q9H2G0_HUMAN CTCL tumor antigen se37-2 OS=Homo sapiens OX=9606 GN=UBE3A PE=2 SV=1;tr|Q9BUI6|Q9BUI6_HUMAN Ubiquitin protein ligase E3A OS=Homo sapiens OX=9606 GN=UBE3A PE=2 SV=2;sp|Q05086-2|UBE3A_HUMAN Isoform I of Ubiquitin-protein ligase E3A OS=	0.206433	0.477247
206	Q05D78;F8W7U8;A0A024R395;P49959-2;P49959;P49959-3;Q9BS79;F5GXT0;F5H742;A0A0S2Z438;F5H256	Double-strand break repair protein MRE11A	MRE11A	tr|Q05D78|Q05D78_HUMAN MRE11A protein (Fragment) OS=Homo sapiens OX=9606 GN=MRE11A PE=2 SV=1;tr|F8W7U8|F8W7U8_HUMAN Double-strand break repair protein OS=Homo sapiens OX=9606 GN=MRE11 PE=1 SV=1;tr|A0A024R395|A0A024R395_HUMAN Double-strand break repair prot	0.703099	1.6177
1876	E9KL44;H0YFD6;P40939;B4DRH6;A0A2R8Y4F5;B4DDZ5;A0A2R8YG21;A0A2R8Y688	Trifunctional enzyme subunit alpha, mitochondrial;Long-chain enoyl-CoA hydratase;Long chain 3-hydroxyacyl-CoA dehydrogenase	HADHA	tr|E9KL44|E9KL44_HUMAN Epididymis tissue sperm binding protein Li 14m OS=Homo sapiens OX=9606 PE=2 SV=1;tr|H0YFD6|H0YFD6_HUMAN Trifunctional enzyme subunit alpha, mitochondrial OS=Homo sapiens OX=9606 GN=HADHA PE=1 SV=2;sp|P40939|ECHA_HUMAN Trifunctional e	0.358025	0.41026
2615	Q02539	Histone H1.1	HIST1H1A	sp|Q02539|H11_HUMAN Histone H1.1 OS=Homo sapiens OX=9606 GN=HIST1H1A PE=1 SV=3	-4.07266	0.935442
696	A0A090N7X1;A0A090N7Y2;Q9UG63;Q9UG63-2;C9JHK9;C9JZV3	ATP-binding cassette sub-family F member 2	ABCF2	tr|A0A090N7X1|A0A090N7X1_HUMAN ATP-binding cassette, sub-family F (GCN20), member 2 OS=Homo sapiens OX=9606 GN=ABCF2 PE=4 SV=1;tr|A0A090N7Y2|A0A090N7Y2_HUMAN ATP-binding cassette, sub-family F (GCN20), member 2 OS=Homo sapiens OX=9606 GN=ABCF2 PE=4 SV=1;sp	-2.69084	1.35821
2496	P52701;P52701-2;P52701-3;A0A087WWJ1;Q1L838;P52701-4;F8WAX8;Q3SWU9;F8W7G9;A0A087WYT6	DNA mismatch repair protein Msh6	MSH6;GTBP	sp|P52701|MSH6_HUMAN DNA mismatch repair protein Msh6 OS=Homo sapiens OX=9606 GN=MSH6 PE=1 SV=2;sp|P52701-2|MSH6_HUMAN Isoform GTBP-alt of DNA mismatch repair protein Msh6 OS=Homo sapiens OX=9606 GN=MSH6;sp|P52701-3|MSH6_HUMAN Isoform 3 of DNA mismatch rep	2.1634	0.582903
384	A0A024R861;O00743;O00743-3;O00743-2;B7Z3E2;A0A0S2Z482;Q5T1S7	Serine/threonine-protein phosphatase;Serine/threonine-protein phosphatase 6 catalytic subunit;Serine/threonine-protein phosphatase 6 catalytic subunit, N-terminally processed	PPP6C	tr|A0A024R861|A0A024R861_HUMAN Serine/threonine-protein phosphatase OS=Homo sapiens OX=9606 GN=PPP6C PE=2 SV=1;sp|O00743|PPP6_HUMAN Serine/threonine-protein phosphatase 6 catalytic subunit OS=Homo sapiens OX=9606 GN=PPP6C PE=1 SV=1;sp|O00743-3|PPP6_HUMAN I	-0.745349	0.618907
184	H7C131;Q8NCW8;B4DEN6;C9JDE9;A0A024R2M6;P09110;H0Y4D4;A0A140VJX0;P09110-2	3-ketoacyl-CoA thiolase, peroxisomal	ACAA1	tr|H7C131|H7C131_HUMAN 3-ketoacyl-CoA thiolase, peroxisomal (Fragment) OS=Homo sapiens OX=9606 GN=ACAA1 PE=1 SV=1;tr|Q8NCW8|Q8NCW8_HUMAN 3-oxoacyl-CoA thiolase (Fragment) OS=Homo sapiens OX=9606 PE=2 SV=1;tr|B4DEN6|B4DEN6_HUMAN cDNA FLJ55549, highly simila	20.7498	1.24433
1064	A0A2R8YEA7			tr|A0A2R8YEA7|A0A2R8YEA7_HUMAN Actin, cytoplasmic 1 (Fragment) OS=Homo sapiens OX=9606 GN=ACTB PE=1 SV=1	20.6079	1.02239
880	B4DT15;A0A0S2Z5M8;Q9BQ52;G5E9D5;B3KT00;Q9BQ52-4;B3KSU9;B4E365;E7ES68;Q9BQ52-2;Q9BQ52-3;H7C2I4;V9GYS7;J3QRS2;V9GYU5;J3QL08;J3QLK4;V9GZ72	Zinc phosphodiesterase ELAC protein 2	ELAC2	tr|B4DT15|B4DT15_HUMAN cDNA FLJ56150, highly similar to Zinc phosphodiesterase ELAC protein 2 OS=Homo sapiens OX=9606 PE=2 SV=1;tr|A0A0S2Z5M8|A0A0S2Z5M8_HUMAN ElaC homolog 2 (E. coli), isoform CRA_b (Fragment) OS=Homo sapiens OX=9606 GN=ELAC2 PE=2 SV=1;sp|	1.65958	0.556274
2820	Q58F09;Q13724-2;Q13724;A8K9K4;C9J8D4;C9JDQ1	Mannosyl-oligosaccharide glucosidase	GCS1;MOGS	tr|Q58F09|Q58F09_HUMAN Glucosidase I OS=Homo sapiens OX=9606 GN=GCS1 PE=2 SV=1;sp|Q13724-2|MOGS_HUMAN Isoform 2 of Mannosyl-oligosaccharide glucosidase OS=Homo sapiens OX=9606 GN=MOGS;sp|Q13724|MOGS_HUMAN Mannosyl-oligosaccharide glucosidase OS=Homo sapien	1.46206	0.974565
142	B4DIU6;A0A024R1P7;B4E2A6;Q9UH99-3;Q9UH99;Q9UH99-2;Q6NT72;A8K129;A0A024R1S6;H0Y686;B0QY60;B0QY63;B0QY64	SUN domain-containing protein 2	UNC84B;SUN2	tr|B4DIU6|B4DIU6_HUMAN cDNA FLJ59542, highly similar to Sad1/unc-84-like protein 2 OS=Homo sapiens OX=9606 PE=2 SV=1;tr|A0A024R1P7|A0A024R1P7_HUMAN Unc-84 homolog B (C. elegans), isoform CRA_b OS=Homo sapiens OX=9606 GN=UNC84B PE=4 SV=1;tr|B4E2A6|B4E2A6_HU	1.82365	0.706915
3328	Q9P2R3;Q9P2R3-2;B3KPZ0;Q9P2R3-4;Q5H9P4;B4DZ21;I3L3P8;K7EPT2	Rabankyrin-5	ANKFY1;DKFZp686M19106	sp|Q9P2R3|ANFY1_HUMAN Rabankyrin-5 OS=Homo sapiens OX=9606 GN=ANKFY1 PE=1 SV=2;sp|Q9P2R3-2|ANFY1_HUMAN Isoform 2 of Rabankyrin-5 OS=Homo sapiens OX=9606 GN=ANKFY1;tr|B3KPZ0|B3KPZ0_HUMAN cDNA FLJ32485 fis, clone SKNMC2001596, highly similar to Ankyrin repea	2.53145	0.868068
2715	Q14807;B7Z9T5;A0A024R632;H3BRB3;Q14807-2;H3BTH5;H3BQB9;B4DNF2;Q7LE35;I3L306;Q14985;O60846	Kinesin-like protein KIF22;Kinesin-like protein	KIF22	sp|Q14807|KIF22_HUMAN Kinesin-like protein KIF22 OS=Homo sapiens OX=9606 GN=KIF22 PE=1 SV=5;tr|B7Z9T5|B7Z9T5_HUMAN Kinesin-like protein OS=Homo sapiens OX=9606 PE=2 SV=1;tr|A0A024R632|A0A024R632_HUMAN Kinesin-like protein OS=Homo sapiens OX=9606 GN=KIF22 P	2.86894	0.851176
2663	Q13131;Q13131-2;Q96E92;B2RA25;A0MZF5;A0A087WXX9;P54646	5-AMP-activated protein kinase catalytic subunit alpha-1	PRKAA1	sp|Q13131|AAPK1_HUMAN 5-AMP-activated protein kinase catalytic subunit alpha-1 OS=Homo sapiens OX=9606 GN=PRKAA1 PE=1 SV=4;sp|Q13131-2|AAPK1_HUMAN Isoform 2 of 5-AMP-activated protein kinase catalytic subunit alpha-1 OS=Homo sapiens OX=9606 GN=PRKAA1;tr|	0.278987	1.01544
1927	F6RTR7;O43808;B0QYW5;B4DP73;F8WE74;B4DU97;F2Z2I9;F8WCH6;F8WA85;F8WEC6	Peroxisomal membrane protein PMP34	SLC25A17	tr|F6RTR7|F6RTR7_HUMAN Peroxisomal membrane protein PMP34 OS=Homo sapiens OX=9606 GN=SLC25A17 PE=1 SV=1;sp|O43808|PM34_HUMAN Peroxisomal membrane protein PMP34 OS=Homo sapiens OX=9606 GN=SLC25A17 PE=1 SV=1;tr|B0QYW5|B0QYW5_HUMAN Peroxisomal membrane protei	21.0841	0.684652
2433	P38606-2;P38606;B7Z2V6;C9JA17;C9JVW8	V-type proton ATPase catalytic subunit A	ATP6V1A	sp|P38606-2|VATA_HUMAN Isoform 2 of V-type proton ATPase catalytic subunit A OS=Homo sapiens OX=9606 GN=ATP6V1A;sp|P38606|VATA_HUMAN V-type proton ATPase catalytic subunit A OS=Homo sapiens OX=9606 GN=ATP6V1A PE=1 SV=2;tr|B7Z2V6|B7Z2V6_HUMAN cDNA FLJ53889,	0.229703	0.332831
3179	Q9BSF4;K7ENF5	Uncharacterized protein C19orf52	C19orf52	sp|Q9BSF4|TIM29_HUMAN Mitochondrial import inner membrane translocase subunit Tim29 OS=Homo sapiens OX=9606 GN=TIMM29 PE=1 SV=2	20.0346	0.60206
1705	B7Z5S1;Q9NTI5-2;Q9NTI5;Q9NTI5-3;Q9NTI5-4	Sister chromatid cohesion protein PDS5 homolog B	PDS5B	tr|B7Z5S1|B7Z5S1_HUMAN cDNA FLJ61699, highly similar to Homo sapiens androgen-induced proliferation inhibitor (APRIN), transcript variant 1, mRNA OS=Homo sapiens OX=9606 PE=2 SV=1;sp|Q9NTI5-2|PDS5B_HUMAN Isoform 2 of Sister chromatid cohesion protein PDS5	1.53002	1.46496
60	B4DRN6;A0A024QZR5;Q9Y2T2;Q8NDP0;H0YBM0;E5RJ52;P53677	AP-3 complex subunit mu-1	AP3M1;DKFZp586G1518	tr|B4DRN6|B4DRN6_HUMAN cDNA FLJ51284, highly similar to Adapter-relatedprotein complex 3 mu-1 subunit OS=Homo sapiens OX=9606 PE=2 SV=1;tr|A0A024QZR5|A0A024QZR5_HUMAN Adaptor-related protein complex 3, mu 1 subunit, isoform CRA_a OS=Homo sapiens OX=9606 GN	-1.14739	1.40064
2725	Q53R49;Q15118;B7Z7N6;Q15118-2;C9JKT3;F8WEJ6;F8WC75;C9IYB4;B7Z207	[Pyruvate dehydrogenase (acetyl-transferring)] kinase isozyme 1, mitochondrial	PDK1	tr|Q53R49|Q53R49_HUMAN Uncharacterized protein PDK1 (Fragment) OS=Homo sapiens OX=9606 GN=PDK1 PE=4 SV=1;sp|Q15118|PDK1_HUMAN [Pyruvate dehydrogenase (acetyl-transferring)] kinase isozyme 1, mitochondrial OS=Homo sapiens OX=9606 GN=PDK1 PE=1 SV=1;tr|B7Z7N6	3.38389	0.814776
3308	Q9NZL4;Q9NZL4-3;K7EL16;A0A024R4R7;Q9NZL4-2;K7EN20;K7ERT9;K7EKM6;K7EMM7	Hsp70-binding protein 1	HSPBP1	sp|Q9NZL4|HPBP1_HUMAN Hsp70-binding protein 1 OS=Homo sapiens OX=9606 GN=HSPBP1 PE=1 SV=2;sp|Q9NZL4-3|HPBP1_HUMAN Isoform 3 of Hsp70-binding protein 1 OS=Homo sapiens OX=9606 GN=HSPBP1;tr|K7EL16|K7EL16_HUMAN Hsp70-binding protein 1 (Fragment) OS=Homo sapie	0.888216	0.928704
1849	G3V0I5;E5KNH5;P49821-2;P49821;Q96ID4;B4DE93;Q53G70;E9PLC6;E9PQP1;E9PMX3;E9PJL9;E9PPR0;E9PPD6;H0YE81;B4DUN7;E9PPS5;H0YD04	NADH dehydrogenase [ubiquinone] flavoprotein 1, mitochondrial	NDUFV1	tr|G3V0I5|G3V0I5_HUMAN NADH dehydrogenase [ubiquinone] flavoprotein 1, mitochondrial OS=Homo sapiens OX=9606 GN=NDUFV1 PE=1 SV=1;tr|E5KNH5|E5KNH5_HUMAN NADH dehydrogenase [ubiquinone] flavoprotein 1, mitochondrial OS=Homo sapiens OX=9606 GN=NDUFV1 PE=3 SV=	20.0415	0.60206
2622	Q05932-3;Q05932-2;Q05932-4;Q05932;Q5JU21;Q5JU20;Q5JU23;Q96G81;B2RDF7	Folylpolyglutamate synthase, mitochondrial	FPGS	sp|Q05932-3|FOLC_HUMAN Isoform 3 of Folylpolyglutamate synthase, mitochondrial OS=Homo sapiens OX=9606 GN=FPGS;sp|Q05932-2|FOLC_HUMAN Isoform 2 of Folylpolyglutamate synthase, mitochondrial OS=Homo sapiens OX=9606 GN=FPGS;sp|Q05932-4|FOLC_HUMAN Isoform 4 o	20.0468	0.60206
2596	P82663;E7EPW2;P82663-2;P82663-3	28S ribosomal protein S25, mitochondrial	MRPS25	sp|P82663|RT25_HUMAN 28S ribosomal protein S25, mitochondrial OS=Homo sapiens OX=9606 GN=MRPS25 PE=1 SV=1;tr|E7EPW2|E7EPW2_HUMAN 28S ribosomal protein S25, mitochondrial OS=Homo sapiens OX=9606 GN=MRPS25 PE=1 SV=1;sp|P82663-2|RT25_HUMAN Isoform 2 of 28S ri	21.3964	1.17593
640	D9ZGF5;A0A0A0MQV6;A0A087WUF6;P09038-2;P09038-3;P09038-1;P09038	Fibroblast growth factor;Fibroblast growth factor 2	FGF2	tr|D9ZGF5|D9ZGF5_HUMAN Fibroblast growth factor OS=Homo sapiens OX=9606 GN=FGF2 PE=3 SV=1;tr|A0A0A0MQV6|A0A0A0MQV6_HUMAN Fibroblast growth factor OS=Homo sapiens OX=9606 GN=FGF2 PE=1 SV=1;tr|A0A087WUF6|A0A087WUF6_HUMAN Fibroblast growth factor OS=Homo sapi	-3.78491	0.86972
1409	B2RDF5;Q9UBT2;B3KMZ6;K7EPL2;Q9UBT2-2;B7Z5X0;U3KQ55;K7ES38;K7ESK7;B3KNA3	SUMO-activating enzyme subunit 2	UBA2	tr|B2RDF5|B2RDF5_HUMAN cDNA, FLJ96587, highly similar to Homo sapiens SUMO-1 activating enzyme subunit 2 (UBA2), mRNA OS=Homo sapiens OX=9606 PE=2 SV=1;sp|Q9UBT2|SAE2_HUMAN SUMO-activating enzyme subunit 2 OS=Homo sapiens OX=9606 GN=UBA2 PE=1 SV=2;tr|B3KMZ	1.62613	0.452548
1233	K7EJC8;E9PCW1;A8K5R6;O95249;B4DQA8;Q96QI9;G5E9T8;O95249-2;Q9BZZ3;F6RU00	Golgi SNAP receptor complex member 1	GOSR1	tr|K7EJC8|K7EJC8_HUMAN Golgi SNAP receptor complex member 1 OS=Homo sapiens OX=9606 GN=GOSR1 PE=1 SV=1;tr|E9PCW1|E9PCW1_HUMAN Golgi SNAP receptor complex member 1 OS=Homo sapiens OX=9606 GN=GOSR1 PE=1 SV=1;tr|A8K5R6|A8K5R6_HUMAN Golgi SNAP receptor complex	-0.96228	0.553421
2303	Q53G61;Q53G21;P09661;H0YMA0;H0YKK0;Q6NVW9;H0YLR3;Q9UEN1;O95485	U2 small nuclear ribonucleoprotein A	SNRPA1	tr|Q53G61|Q53G61_HUMAN Small nuclear ribonucleoprotein polypeptide A variant (Fragment) OS=Homo sapiens OX=9606 PE=2 SV=1;tr|Q53G21|Q53G21_HUMAN Small nuclear ribonucleoprotein polypeptide A variant (Fragment) OS=Homo sapiens OX=9606 PE=2 SV=1;sp|P09661|	-1.62295	0.527887
1732	B7ZMF2;Q9NVI1;F8W7R3;B3KNW8;Q9NVI1-2;Q9NVI1-1;H3BP78;Q9NVI1-4;H3BT54;H3BMG4;H3BN35;H3BQE2;H3BS60	Fanconi anemia group I protein	FANCI	tr|B7ZMF2|B7ZMF2_HUMAN Fanconi anemia, complementation group I OS=Homo sapiens OX=9606 GN=FANCI PE=2 SV=1;sp|Q9NVI1|FANCI_HUMAN Fanconi anemia group I protein OS=Homo sapiens OX=9606 GN=FANCI PE=1 SV=4;tr|F8W7R3|F8W7R3_HUMAN Fanconi anemia group I protein	-0.518539	0.755921
1449	B3KNC3;Q9Y3T9;Q9H9J5;Q8NAK7;B4DY21;B4DM71	Nucleolar complex protein 2 homolog	NOC2L	tr|B3KNC3|B3KNC3_HUMAN cDNA FLJ14222 fis, clone NT2RP3003992, highly similar to Nucleolar complex protein 2 homolog OS=Homo sapiens OX=9606 PE=2 SV=1;sp|Q9Y3T9|NOC2L_HUMAN Nucleolar complex protein 2 homolog OS=Homo sapiens OX=9606 GN=NOC2L PE=1 SV=4;tr|Q9	1.45646	0.810331
2614	Q02040;X6RAJ1;Q02040-2;Q02040-3;Q05DA9	A-kinase anchor protein 17A	AKAP17A	sp|Q02040|AK17A_HUMAN A-kinase anchor protein 17A OS=Homo sapiens OX=9606 GN=AKAP17A PE=1 SV=2;tr|X6RAJ1|X6RAJ1_HUMAN A-kinase anchor protein 17A OS=Homo sapiens OX=9606 GN=AKAP17A PE=1 SV=1;sp|Q02040-2|AK17A_HUMAN Isoform 2 of A-kinase anchor protein 17A	20.9525	0.923633
3169	Q96T76;Q96T76-9;Q96T76-8;Q96T76-5;Q5T454;H0Y746;Q96T76-7;O43410;H7C1W5;B0QZ77;F8WCH8;H0Y7V3	MMS19 nucleotide excision repair protein homolog	MMS19	sp|Q96T76|MMS19_HUMAN MMS19 nucleotide excision repair protein homolog OS=Homo sapiens OX=9606 GN=MMS19 PE=1 SV=2;sp|Q96T76-9|MMS19_HUMAN Isoform 6 of MMS19 nucleotide excision repair protein homolog OS=Homo sapiens OX=9606 GN=MMS19;sp|Q96T76-8|MMS19_HUMAN	-0.559018	0.597172
12	B4DVU3;B4DDN4;B4DVQ5;A1KYQ7;A0A024QYU9;Q99613;B5ME19;B4DRU0;Q99613-2;A0A024QYX7;B3KNZ4;B4E2Z6;H3BPE4;Q3B7B9;H3BTY8;H3BPE3	Eukaryotic translation initiation factor 3 subunit C;Eukaryotic translation initiation factor 3 subunit C-like protein	EIF3C;EIF3CL	tr|B4DVU3|B4DVU3_HUMAN Eukaryotic translation initiation factor 3 subunit C OS=Homo sapiens OX=9606 GN=EIF3C PE=2 SV=1;tr|B4DDN4|B4DDN4_HUMAN Eukaryotic translation initiation factor 3 subunit C OS=Homo sapiens OX=9606 GN=EIF3C PE=2 SV=1;tr|B4DVQ5|B4DVQ5_H	0.298647	0.377035
2282	R4SBI6;Q6FGZ3;P07099;B1AQP9;B1AQP8;A0A0S2Z3T1	Epoxide hydrolase 1	EPHX1	tr|R4SBI6|R4SBI6_HUMAN Epoxide hydrolase OS=Homo sapiens OX=9606 GN=EPHX1 PE=2 SV=1;tr|Q6FGZ3|Q6FGZ3_HUMAN EPHX1 protein (Fragment) OS=Homo sapiens OX=9606 GN=EPHX1 PE=2 SV=1;sp|P07099|HYEP_HUMAN Epoxide hydrolase 1 OS=Homo sapiens OX=9606 GN=EPHX1 PE=1 SV	3.70378	1.21651
322	A0A024R6H0;Q9P2I0;B3KN45;B3KMI0;H0YJF4;G3V3T7;G3V5T3	Cleavage and polyadenylation specificity factor subunit 2	CPSF2	tr|A0A024R6H0|A0A024R6H0_HUMAN Cleavage and polyadenylation specificity factor subunit 2 OS=Homo sapiens OX=9606 GN=CPSF2 PE=3 SV=1;sp|Q9P2I0|CPSF2_HUMAN Cleavage and polyadenylation specificity factor subunit 2 OS=Homo sapiens OX=9606 GN=CPSF2 PE=1 SV=2;t	-3.96052	1.63044
1364	H3BN86;Q8TD49;B2R7Q6;Q9H1A3;H3BM54;H3BPE9;H3BQD2	Methyltransferase-like protein 9	METTL9;PAP1	tr|H3BN86|H3BN86_HUMAN Methyltransferase-like protein 9 (Fragment) OS=Homo sapiens OX=9606 GN=METTL9 PE=1 SV=1;tr|Q8TD49|Q8TD49_HUMAN Methyltransferase-like protein 9 OS=Homo sapiens OX=9606 GN=METTL9 PE=1 SV=1;tr|B2R7Q6|B2R7Q6_HUMAN cDNA, FLJ93558, Homo s	1.18352	0.521211
3296	Q9NX47;B4DGV8	E3 ubiquitin-protein ligase MARCH5	MARCH5	sp|Q9NX47|MARH5_HUMAN E3 ubiquitin-protein ligase MARCH5 OS=Homo sapiens OX=9606 GN=MARCH5 PE=1 SV=1;tr|B4DGV8|B4DGV8_HUMAN cDNA FLJ54286, highly similar to Mus musculus membrane-associated ring finger (C3HC4) 5 (March5), mRNA OS=Homo sapiens OX=9606 PE=2	21.6463	1.01585
419	A0A024R8Q0;A0A0S2Z5A5;A0A024R8V0;Q9UHD8-3;Q9UHD8-7;Q9UHD8-2;Q9UHD8-5;Q9UHD8;K7EK18;K7EL40;A0A0S2Z5W9;Q9UHD8-4;Q9UHD8-9;Q9UHD8-8;K7ER52;K7EIE4;K7EQD7;K7ELJ9;K7EJZ2;K7ER14;K7EIR4;K7EKN4;K7EN52;K7ENQ5;Q1WWK5;K7EJL9;K7ERG1;K7EQ08;K7EJ51	Septin-9	SEPT9	tr|A0A024R8Q0|A0A024R8Q0_HUMAN Septin 9, isoform CRA_b OS=Homo sapiens OX=9606 GN=SEPT9 PE=3 SV=1;tr|A0A0S2Z5A5|A0A0S2Z5A5_HUMAN Septin 9 isoform 1 (Fragment) OS=Homo sapiens OX=9606 GN=SEPT9 PE=2 SV=1;tr|A0A024R8V0|A0A024R8V0_HUMAN Septin 9, isoform CRA_a	-0.443121	0.658046
2296	V9HWE0;P08758;D6RBL5;E9PHT9;D6RBE9;B4DNG6	Annexin;Annexin A5	HEL-S-7;ANXA5	tr|V9HWE0|V9HWE0_HUMAN Annexin OS=Homo sapiens OX=9606 GN=HEL-S-7 PE=2 SV=1;sp|P08758|ANXA5_HUMAN Annexin A5 OS=Homo sapiens OX=9606 GN=ANXA5 PE=1 SV=2;tr|D6RBL5|D6RBL5_HUMAN Annexin OS=Homo sapiens OX=9606 GN=ANXA5 PE=1 SV=1;tr|E9PHT9|E9PHT9_HUMAN Annexin	20.5547	0.847751
1372	B2R894;Q96DV4;Q96DV4-2	39S ribosomal protein L38, mitochondrial	MRPL38	tr|B2R894|B2R894_HUMAN Mitochondrial ribosomal protein L38, isoform CRA_b OS=Homo sapiens OX=9606 GN=MRPL38 PE=1 SV=1;sp|Q96DV4|RM38_HUMAN 39S ribosomal protein L38, mitochondrial OS=Homo sapiens OX=9606 GN=MRPL38 PE=1 SV=2;sp|Q96DV4-2|RM38_HUMAN Isoform 2	2.64342	1.19458
1188	E7BSV0;Q2TTR7;A9CB80;A8K2T7;P00533;Q504U8;E9PFD7;F2YGG7;B7Z2I3;Q59FL8;Q68GS6;P00533-4;P00533-3;A0A2D3C337;A0A2D3C335;P00533-2;Q75MF2;C9JYS6;B6RC66;F1JTL6;B6RC65;A2VCQ7;Q147T7;A0A1W2PRR9;B4DTR1;J3QLU9;X5DNK3;P04626-3;P04626-2;P04626-5;P04626-4;P04626	Receptor protein-tyrosine kinase;Epidermal growth factor receptor	EGFR	tr|E7BSV0|E7BSV0_HUMAN Receptor protein-tyrosine kinase OS=Homo sapiens OX=9606 GN=EGFR PE=2 SV=1;tr|Q2TTR7|Q2TTR7_HUMAN Receptor protein-tyrosine kinase OS=Homo sapiens OX=9606 PE=2 SV=1;tr|A9CB80|A9CB80_HUMAN Receptor protein-tyrosine kinase OS=Homo sapi	2.13909	1.88438
3240	Q9H6K4;B4DK77;Q9H6K4-2	Optic atrophy 3 protein	OPA3	sp|Q9H6K4|OPA3_HUMAN Optic atrophy 3 protein OS=Homo sapiens OX=9606 GN=OPA3 PE=1 SV=1	20.8628	1.20945
2911	Q6NUR1;Q9BPX3;H0Y9Z8;D6RA93	Condensin complex subunit 3	NCAPG	tr|Q6NUR1|Q6NUR1_HUMAN Non-SMC condensin I complex, subunit G OS=Homo sapiens OX=9606 GN=NCAPG PE=2 SV=1;sp|Q9BPX3|CND3_HUMAN Condensin complex subunit 3 OS=Homo sapiens OX=9606 GN=NCAPG PE=1 SV=1	-0.566685	1.57009
1410	B2RDG1;Q8WVX9;E9PNW8;Q9H600;E9PPB8	Fatty acyl-CoA reductase 1	FAR1	tr|B2RDG1|B2RDG1_HUMAN Fatty acyl-CoA reductase OS=Homo sapiens OX=9606 PE=2 SV=1;sp|Q8WVX9|FACR1_HUMAN Fatty acyl-CoA reductase 1 OS=Homo sapiens OX=9606 GN=FAR1 PE=1 SV=1;tr|E9PNW8|E9PNW8_HUMAN Fatty acyl-CoA reductase (Fragment) OS=Homo sapiens OX=9606	-0.203125	0.374121
210	A0A024R3J7;P46977;P46977-2;A0A0C4DH80;E9PN73;E9PI32	Dolichyl-diphosphooligosaccharide--protein glycosyltransferase subunit STT3A	hCG_2032701;STT3A	tr|A0A024R3J7|A0A024R3J7_HUMAN HCG2032701, isoform CRA_a OS=Homo sapiens OX=9606 GN=hCG_2032701 PE=4 SV=1;sp|P46977|STT3A_HUMAN Dolichyl-diphosphooligosaccharide--protein glycosyltransferase subunit STT3A OS=Homo sapiens OX=9606 GN=STT3A PE=1 SV=2;sp|P4697	1.54288	0.820827
3407	Q9Y487;Q8TBM3;B4DQF7;F5H5F3;F5H847;F5GX48	V-type proton ATPase 116 kDa subunit a isoform 2	ATP6V0A2	sp|Q9Y487|VPP2_HUMAN V-type proton ATPase 116 kDa subunit a isoform 2 OS=Homo sapiens OX=9606 GN=ATP6V0A2 PE=1 SV=2	1.67106	1.16422
1922	F5H442;Q99816;L0L6B6;D3DQY6;Q99816-2;J3QRU6;J3QKS4	Tumor susceptibility gene 101 protein	TSG101	tr|F5H442|F5H442_HUMAN Tumor susceptibility gene 101 protein OS=Homo sapiens OX=9606 GN=TSG101 PE=1 SV=1;sp|Q99816|TS101_HUMAN Tumor susceptibility gene 101 protein OS=Homo sapiens OX=9606 GN=TSG101 PE=1 SV=2;tr|L0L6B6|L0L6B6_HUMAN Tumor susceptibility pro	-0.876544	0.581678
3015	Q8IYS2;Q8IYS2-2;B2RXJ9;A0A024R4J3	Uncharacterized protein KIAA2013	KIAA2013	sp|Q8IYS2|K2013_HUMAN Uncharacterized protein KIAA2013 OS=Homo sapiens OX=9606 GN=KIAA2013 PE=1 SV=1;sp|Q8IYS2-2|K2013_HUMAN Isoform 2 of Uncharacterized protein KIAA2013 OS=Homo sapiens OX=9606 GN=KIAA2013	2.71302	1.2244
3360	Q9UKM7;A0A291FGE6;H0YG20;B4DR05;B3KQC5;H0YGV7;B4DPS9;B3KXZ1;Q9UFZ8;Q68D80;Q8N2P4;Q59G33;H0YI64;H0YIU0	Endoplasmic reticulum mannosyl-oligosaccharide 1,2-alpha-mannosidase;alpha-1,2-Mannosidase	MAN1B1	sp|Q9UKM7|MA1B1_HUMAN Endoplasmic reticulum mannosyl-oligosaccharide 1,2-alpha-mannosidase OS=Homo sapiens OX=9606 GN=MAN1B1 PE=1 SV=2;tr|A0A291FGE6|A0A291FGE6_HUMAN alpha-1,2-Mannosidase OS=Homo sapiens OX=9606 GN=MAN1B1 PE=2 SV=1;tr|H0YG20|H0YG20_HUMAN a	2.18089	0.686408
2179	O60678;B4DWB1;Q8WUV3;O60678-2;B4DP44	Protein arginine N-methyltransferase 3	PRMT3	sp|O60678|ANM3_HUMAN Protein arginine N-methyltransferase 3 OS=Homo sapiens OX=9606 GN=PRMT3 PE=1 SV=4;tr|B4DWB1|B4DWB1_HUMAN cDNA FLJ61431, highly similar to Protein arginine N-methyltransferase 3 OS=Homo sapiens OX=9606 PE=2 SV=1;tr|Q8WUV3|Q8WUV3_HUMAN P	-3.72814	0.914968
2333	P15291-2;W6MEN3;P15291;B7ZAH9;B4DLB8;B4DMM8;W6MEN4;Q86XA6	Beta-1,4-galactosyltransferase 1;Lactose synthase A protein;N-acetyllactosamine synthase;Beta-N-acetylglucosaminylglycopeptide beta-1,4-galactosyltransferase;Beta-N-acetylglucosaminyl-glycolipid beta-1,4-galactosyltransferase;Processed beta-1,4-galactosyltransferase 1	B4GALT1	sp|P15291-2|B4GT1_HUMAN Isoform Short of Beta-1,4-galactosyltransferase 1 OS=Homo sapiens OX=9606 GN=B4GALT1;tr|W6MEN3|W6MEN3_HUMAN Beta-1,4-galactosyltransferase 1 OS=Homo sapiens OX=9606 GN=B4GALT1 PE=2 SV=1;sp|P15291|B4GT1_HUMAN Beta-1,4-galactosyltrans	21.9877	1.82718
1099	B3KQX7;B4DI53;B4DDS1;B4DJ65;Q86XR1;D4P3Q7;A2A2V1;Q6FGR8;Q6FGN5;Q53YK7;B2R5Q9;A1YVW6;Q6SES1;O75942;P04156-2;P04156;Q540C4;X6RKS3;B2NI05;B2NI04;Q5U0K3	Major prion protein	PRNP	tr|B3KQX7|B3KQX7_HUMAN cDNA FLJ33256 fis, clone ASTRO2005557, highly similar to MAJOR PRION PROTEIN OS=Homo sapiens OX=9606 PE=2 SV=1;tr|B4DI53|B4DI53_HUMAN cDNA FLJ52543, highly similar to Major prion protein OS=Homo sapiens OX=9606 PE=2 SV=1;tr|B4DDS1|B4	21.5986	1.07754
2424	P36507;Q7Z370;G5E9C7;B3KS97;M0R1B6	Dual specificity mitogen-activated protein kinase kinase 2	MAP2K2;DKFZp686L02273	sp|P36507|MP2K2_HUMAN Dual specificity mitogen-activated protein kinase kinase 2 OS=Homo sapiens OX=9606 GN=MAP2K2 PE=1 SV=1;tr|Q7Z370|Q7Z370_HUMAN Uncharacterized protein DKFZp686L02273 OS=Homo sapiens OX=9606 GN=DKFZp686L02273 PE=2 SV=1;tr|G5E9C7|G5E9C7_	3.30975	1.02552
2619	Q03169;B4DZH8;H0YLC0;A1A584;B7ZB31;B4E1C8;H0YKR7	Tumor necrosis factor alpha-induced protein 2	TNFAIP2	sp|Q03169|TNAP2_HUMAN Tumor necrosis factor alpha-induced protein 2 OS=Homo sapiens OX=9606 GN=TNFAIP2 PE=2 SV=2;tr|B4DZH8|B4DZH8_HUMAN cDNA FLJ50311, highly similar to Tumor necrosis factor, alpha-induced protein 2 OS=Homo sapiens OX=9606 PE=2 SV=1;tr|H0Y	0.531912	0.994022
2461	V9HW00;P48729-3;P48729;P48729-2;B4E1D9;Q05DL3;D6REM4;Q6PJ06;E7ETM0;B4DER9;H0Y9X2;U3KQK7;B4DFH4;Q8N752;U3KPX3;E5RG27;D6RGE5;U3KQ83	Casein kinase I isoform alpha	HEL-S-77p;CSNK1A1	tr|V9HW00|V9HW00_HUMAN Epididymis secretory sperm binding protein Li 77p (Fragment) OS=Homo sapiens OX=9606 GN=HEL-S-77p PE=2 SV=1;sp|P48729-3|KC1A_HUMAN Isoform 3 of Casein kinase I isoform alpha OS=Homo sapiens OX=9606 GN=CSNK1A1;sp|P48729|KC1A_HUMAN Cas	3.87604	0.801699
1947	F8WDV0;Q9UI26;Q9UI26-2;B3KN03;H0Y8M5	Importin-11	IPO11	tr|F8WDV0|F8WDV0_HUMAN Importin-11 OS=Homo sapiens OX=9606 GN=IPO11 PE=1 SV=1;sp|Q9UI26|IPO11_HUMAN Importin-11 OS=Homo sapiens OX=9606 GN=IPO11 PE=1 SV=1;sp|Q9UI26-2|IPO11_HUMAN Isoform 2 of Importin-11 OS=Homo sapiens OX=9606 GN=IPO11;tr|B3KN03|B3KN03_HU	-0.205286	0.560494
124	A0A024R1A3;P22314-2;P22314;B4DDE4;B4DL67;Q5JRR6;B3KUJ2;Q8WY81	Ubiquitin-like modifier-activating enzyme 1	UBE1;UBA1	tr|A0A024R1A3|A0A024R1A3_HUMAN Testicular secretory protein Li 63 OS=Homo sapiens OX=9606 GN=UBE1 PE=2 SV=1;sp|P22314-2|UBA1_HUMAN Isoform 2 of Ubiquitin-like modifier-activating enzyme 1 OS=Homo sapiens OX=9606 GN=UBA1;sp|P22314|UBA1_HUMAN Ubiquitin-like	1.55588	0.636565
3429	Q9Y6M7-6;Q9Y6M7-13;Q9Y6M7-8;Q9Y6M7-7;A0A0A0MST8;E9PFN4;B5M450;Q9Y6M7-2;Q9Y6M7-9;Q9Y6M7-12;Q9Y6M7;Q9Y6M7-4;Q9Y6M7-3;C9JRP1;H7C3C4;Q9Y6M7-5;Q9Y6M7-11;Q9Y6M7-14;Q9Y6M7-10;E7EW28;C9J240;Q6U841-2;Q6U841-3;Q6U841	Sodium bicarbonate cotransporter 3;Anion exchange protein	SLC4A7	sp|Q9Y6M7-6|S4A7_HUMAN Isoform 6 of Sodium bicarbonate cotransporter 3 OS=Homo sapiens OX=9606 GN=SLC4A7;sp|Q9Y6M7-13|S4A7_HUMAN Isoform 13 of Sodium bicarbonate cotransporter 3 OS=Homo sapiens OX=9606 GN=SLC4A7;sp|Q9Y6M7-8|S4A7_HUMAN Isoform 8 of Sodium b	0.344765	0.662095
3138	Q96EV2;A8MTF7;Q96EV2-2;A0A0C4DFS3;H0Y3K3	RNA-binding protein 33	RBM33	sp|Q96EV2|RBM33_HUMAN RNA-binding protein 33 OS=Homo sapiens OX=9606 GN=RBM33 PE=1 SV=3	-4.86854	1.73038
782	A0A0C4DGQ8;Q6IAN0;J3KRS1;J3QKT1;J3QLK1;J3QLJ8	Dehydrogenase/reductase SDR family member 7B	DHRS7B	tr|A0A0C4DGQ8|A0A0C4DGQ8_HUMAN Dehydrogenase/reductase SDR family member 7B OS=Homo sapiens OX=9606 GN=DHRS7B PE=1 SV=1;sp|Q6IAN0|DRS7B_HUMAN Dehydrogenase/reductase SDR family member 7B OS=Homo sapiens OX=9606 GN=DHRS7B PE=1 SV=2	2.30487	1.53996
3382	Q9Y263;E5RIM3;H0YBW4;H0YC16;H0YAU9	Phospholipase A-2-activating protein	PLAA	sp|Q9Y263|PLAP_HUMAN Phospholipase A-2-activating protein OS=Homo sapiens OX=9606 GN=PLAA PE=1 SV=2;tr|E5RIM3|E5RIM3_HUMAN Phospholipase A-2-activating protein OS=Homo sapiens OX=9606 GN=PLAA PE=1 SV=1	-2.99904	1.01417
646	A0A087WUX8;A0A087WYF7;Q6UXV4;Q68DW4	MICOS complex subunit MIC27	APOOL;DKFZp779P1227	tr|A0A087WUX8|A0A087WUX8_HUMAN MICOS complex subunit OS=Homo sapiens OX=9606 GN=APOOL PE=1 SV=1;tr|A0A087WYF7|A0A087WYF7_HUMAN MICOS complex subunit OS=Homo sapiens OX=9606 GN=APOOL PE=1 SV=1;sp|Q6UXV4|MIC27_HUMAN MICOS complex subunit MIC27 OS=Homo sapien	21.3807	0.401039
2931	Q6UXT9	Abhydrolase domain-containing protein 15	ABHD15	sp|Q6UXT9|ABH15_HUMAN Protein ABHD15 OS=Homo sapiens OX=9606 GN=ABHD15 PE=1 SV=2	1.91866	0.920897
2144	O15554;D1MQ09;D1MQ08;D1MQ10;M0R1J0;M0QZ70;M0R2F1;M0R2E8	Intermediate conductance calcium-activated potassium channel protein 4	KCNN4	sp|O15554|KCNN4_HUMAN Intermediate conductance calcium-activated potassium channel protein 4 OS=Homo sapiens OX=9606 GN=KCNN4 PE=1 SV=1;tr|D1MQ09|D1MQ09_HUMAN Small conductance potassium channel type4 transcript variant 3 OS=Homo sapiens OX=9606 GN=KCNN4 P	2.5637	0.827965
2917	Q6P2Q9;B4DK16;I3L0J9;Q6JH02;Q6JH03;Q53GM6;I3L3Z8	Pre-mRNA-processing-splicing factor 8	PRPF8	sp|Q6P2Q9|PRP8_HUMAN Pre-mRNA-processing-splicing factor 8 OS=Homo sapiens OX=9606 GN=PRPF8 PE=1 SV=2;tr|B4DK16|B4DK16_HUMAN cDNA FLJ57882, highly similar to Pre-mRNA-processing-splicing factor 8 OS=Homo sapiens OX=9606 PE=2 SV=1	-1.12478	1.07173
2343	P17858;P17858-2;Q7L2M7;Q9BSP4;B3KNQ7;B4E108;Q7Z3R9;Q6MZK4;Q59GI2	ATP-dependent 6-phosphofructokinase, liver type	PFKL	sp|P17858|PFKAL_HUMAN ATP-dependent 6-phosphofructokinase, liver type OS=Homo sapiens OX=9606 GN=PFKL PE=1 SV=6;sp|P17858-2|PFKAL_HUMAN Isoform 2 of ATP-dependent 6-phosphofructokinase, liver type OS=Homo sapiens OX=9606 GN=PFKL;tr|Q7L2M7|Q7L2M7_HUMAN PFKL	-0.459231	1.07967
1263	Q9BRG8;B1AVT0;A8K7I0;P49760-3;P49760;B7Z8N6;A4D151;A4D150	Dual specificity protein kinase CLK2	CLK2	tr|Q9BRG8|Q9BRG8_HUMAN CLK2 protein (Fragment) OS=Homo sapiens OX=9606 GN=CLK2 PE=2 SV=2;tr|B1AVT0|B1AVT0_HUMAN Dual-specificity protein kinase CLK2 OS=Homo sapiens OX=9606 GN=CLK2 PE=1 SV=1;tr|A8K7I0|A8K7I0_HUMAN CDC-like kinase 2, isoform CRA_a OS=Homo s	-0.829809	0.541168
212	A0A024R3P1;O15121	Sphingolipid delta(4)-desaturase DES1	DEGS1	tr|A0A024R3P1|A0A024R3P1_HUMAN Degenerative spermatocyte homolog 1, lipid desaturase (Drosophila), isoform CRA_a OS=Homo sapiens OX=9606 GN=DEGS1 PE=3 SV=1;sp|O15121|DEGS1_HUMAN Sphingolipid delta(4)-desaturase DES1 OS=Homo sapiens OX=9606 GN=DEGS1 PE=1 SV	21.2135	2.75273
3368	Q9UMS4;F5GY56;F5H2I0	Pre-mRNA-processing factor 19	PRPF19	sp|Q9UMS4|PRP19_HUMAN Pre-mRNA-processing factor 19 OS=Homo sapiens OX=9606 GN=PRPF19 PE=1 SV=1;tr|F5GY56|F5GY56_HUMAN Pre-mRNA-processing factor 19 (Fragment) OS=Homo sapiens OX=9606 GN=PRPF19 PE=1 SV=1	1.53795	0.381521
3303	Q9NYF8-2;Q9NYF8;Q9NYF8-4;H0YF14;B0AZU3	Bcl-2-associated transcription factor 1	BCLAF1	sp|Q9NYF8-2|BCLF1_HUMAN Isoform 2 of Bcl-2-associated transcription factor 1 OS=Homo sapiens OX=9606 GN=BCLAF1;sp|Q9NYF8|BCLF1_HUMAN Bcl-2-associated transcription factor 1 OS=Homo sapiens OX=9606 GN=BCLAF1 PE=1 SV=2;sp|Q9NYF8-4|BCLF1_HUMAN Isoform 4 of Bc	-8.35502	1.39749
934	D3DPE6;A0A140VJZ9;O43516-2;O43516;O43516-3;Q2YDC4;E9PB87;B4E2B2;O43516-4;B4DVX1	WAS/WASL-interacting protein family member 1	WASPIP;WIPF1	tr|D3DPE6|D3DPE6_HUMAN Wiskott-Aldrich syndrome protein interacting protein, isoform CRA_a OS=Homo sapiens OX=9606 GN=WASPIP PE=4 SV=1;tr|A0A140VJZ9|A0A140VJZ9_HUMAN Testicular tissue protein Li 226 OS=Homo sapiens OX=9606 PE=2 SV=1;sp|O43516-2|WIPF1_HUMAN	-0.518744	0.60206
402	A0A024R8D2;Q6P1M0;B3KNH1;B3KQE8;Q9BTA1;Q6P1M0-2;Q96DY3;B7Z3U1;Q6PCB7-2;Q6PCB7	Long-chain fatty acid transport protein 4	SLC27A4	tr|A0A024R8D2|A0A024R8D2_HUMAN Solute carrier family 27 (Fatty acid transporter), member 4, isoform CRA_a OS=Homo sapiens OX=9606 GN=SLC27A4 PE=4 SV=1;sp|Q6P1M0|S27A4_HUMAN Long-chain fatty acid transport protein 4 OS=Homo sapiens OX=9606 GN=SLC27A4 PE=1 S	2.23776	0.914873
28	A0A024QZ59;Q9BUZ4;A0A024QZ19;B4DUU9;F6SA91;Q2KJU3;Q2KJU6;A0A0C4DFM9;Q9BUZ4-2;J9JIG0;Q2KJU5	TNF receptor-associated factor 4	TRAF4	tr|A0A024QZ59|A0A024QZ59_HUMAN TNF receptor-associated factor 4, isoform CRA_a OS=Homo sapiens OX=9606 GN=TRAF4 PE=4 SV=1;sp|Q9BUZ4|TRAF4_HUMAN TNF receptor-associated factor 4 OS=Homo sapiens OX=9606 GN=TRAF4 PE=1 SV=1;tr|A0A024QZ19|A0A024QZ19_HUMAN TNF r	2.40015	0.767686
2223	O95071-2;O95071;E7EMW7;E7ET84;B3KML2;E5RFK7	E3 ubiquitin-protein ligase UBR5	UBR5	sp|O95071-2|UBR5_HUMAN Isoform 2 of E3 ubiquitin-protein ligase UBR5 OS=Homo sapiens OX=9606 GN=UBR5;sp|O95071|UBR5_HUMAN E3 ubiquitin-protein ligase UBR5 OS=Homo sapiens OX=9606 GN=UBR5 PE=1 SV=2;tr|E7EMW7|E7EMW7_HUMAN E3 ubiquitin-protein ligase UBR5 OS=	-0.756079	0.803498
2534	P61026;Q53T70	Ras-related protein Rab-10	RAB10	sp|P61026|RAB10_HUMAN Ras-related protein Rab-10 OS=Homo sapiens OX=9606 GN=RAB10 PE=1 SV=1;tr|Q53T70|Q53T70_HUMAN Uncharacterized protein RAB10 (Fragment) OS=Homo sapiens OX=9606 GN=RAB10 PE=4 SV=1	0.889913	0.78431
2858	Q5T280;Q9P041;R4GNG4;B4E0X4	Putative methyltransferase C9orf114	C9orf114	sp|Q5T280|CI114_HUMAN Putative methyltransferase C9orf114 OS=Homo sapiens OX=9606 GN=SPOUT1 PE=1 SV=3;tr|Q9P041|Q9P041_HUMAN HSPC109 OS=Homo sapiens OX=9606 PE=2 SV=1	21.6511	1.1165
2305	P0CG39;Q562Y4;Q562X7;Q562X6;Q562X4;Q562X2;Q562X0;Q562T6;Q562T5;Q562T4;Q562T3;Q562T0;Q562R6;Q562R5;Q562Q9;Q562Q8;Q562Q4;Q562Q2;Q562Q0;Q562L3;Q562Q1;A0A0G2JRD4;Q495V5;A0A0D9SFE8;A0A0G2JQ08;A0A087WXQ7;A6NC16;D7UEQ8;A0A0G2JQB7;A0A0C4DH93;A0A087X187;A0A087X092;A0A087X067;A0A087WTB9;A0A0A6YYL3;Q495V6;A0A0G2JMU2;Q6S8J3-3;A0JP26-2;Q6S8J3-2;Q6S8J7-2;Q6S5H5-2;Q6S8J7;Q6S5H5;A6NI47;B2RU33;H3BUK9;A0JP26-3;Q6S…	POTE ankyrin domain family member J	POTEJ	sp|P0CG39|POTEJ_HUMAN POTE ankyrin domain family member J OS=Homo sapiens OX=9606 GN=POTEJ PE=3 SV=1	20.2552	0.60206
2883	Q643R3;B7ZM32;A0A0C4DGT4;H3BMK4	Lysophospholipid acyltransferase LPCAT4	LPCAT4	sp|Q643R3|LPCT4_HUMAN Lysophospholipid acyltransferase LPCAT4 OS=Homo sapiens OX=9606 GN=LPCAT4 PE=1 SV=1;tr|B7ZM32|B7ZM32_HUMAN LPCAT4 protein (Fragment) OS=Homo sapiens OX=9606 GN=LPCAT4 PE=2 SV=1;tr|A0A0C4DGT4|A0A0C4DGT4_HUMAN Lysophospholipid acyltrans	21.0257	1.26354
2040	J3KNQ4;Q9NVD7;B7Z952;E9PS97;Q9NVD7-2	Alpha-parvin	PARVA	tr|J3KNQ4|J3KNQ4_HUMAN Alpha-parvin OS=Homo sapiens OX=9606 GN=PARVA PE=1 SV=1;sp|Q9NVD7|PARVA_HUMAN Alpha-parvin OS=Homo sapiens OX=9606 GN=PARVA PE=1 SV=1;tr|B7Z952|B7Z952_HUMAN cDNA FLJ54827, highly similar to Alpha-parvin OS=Homo sapiens OX=9606 PE=2 S	-0.715873	0.396738
1055	A0A2R8Y6J3;B3KTM6;A2RUM7;P46777;Q59GX9;Q5T7N0;Q9BUV4;A0A2R8Y4A2	60S ribosomal protein L5	RPL5	tr|A0A2R8Y6J3|A0A2R8Y6J3_HUMAN 60S ribosomal protein L5 (Fragment) OS=Homo sapiens OX=9606 GN=RPL5 PE=1 SV=1;tr|B3KTM6|B3KTM6_HUMAN Ribosomal protein L5, isoform CRA_b OS=Homo sapiens OX=9606 GN=RPL5 PE=2 SV=1;tr|A2RUM7|A2RUM7_HUMAN Ribosomal protein L5 OS	-1.28776	1.11813
50	B4DG62;A8K7J7;A0A024QZK7;Q59FD4;B3KXY9;P19367-4;P19367-2;P19367;P19367-3;B3KRA9;B1AR63;B3KT70;A8K4Q9;Q2TB90;B1AR62;B4E0J9;A0A024R7R1;Q59H08;P52790;Q2TB90-3;Q2TB90-2	Hexokinase;Hexokinase-1	HK1	tr|B4DG62|B4DG62_HUMAN cDNA FLJ56506, highly similar to Hexokinase-1 OS=Homo sapiens OX=9606 PE=2 SV=1;tr|A8K7J7|A8K7J7_HUMAN cDNA FLJ78173, highly similar to Homo sapiens hexokinase 1 (HK1) mRNA OS=Homo sapiens OX=9606 PE=2 SV=1;tr|A0A024QZK7|A0A024QZK7_H	0.58657	0.652498
1211	B4DQI7;A8K4I8;Q9BPW8;C9JDV8;H7C2U6	Protein NipSnap homolog 1	NIPSNAP1	tr|B4DQI7|B4DQI7_HUMAN cDNA FLJ58042, highly similar to Protein NipSnap1 OS=Homo sapiens OX=9606 PE=2 SV=1;tr|A8K4I8|A8K4I8_HUMAN cDNA FLJ78131, highly similar to Homo sapiens nipsnap homolog 1 (C. elegans) (NIPSNAP1), mRNA OS=Homo sapiens OX=9606 PE=2 SV=	21.9335	1.54106
666	A8CDT9;A0A087WY00;G3V394;F8WE88;F8W6H6;Q9Y4I1-2;Q9Y4I1;Q9Y4I1-3;B4E147;Q59FF5;H0YM96;H0YMK3;Q9NQX4-2;G3V3C9;B4DVH2;E7ERV5;B5LY56	Unconventional myosin-Va	MYO5A	tr|A8CDT9|A8CDT9_HUMAN MYO5A variant protein OS=Homo sapiens OX=9606 PE=2 SV=1;tr|A0A087WY00|A0A087WY00_HUMAN Unconventional myosin-Va OS=Homo sapiens OX=9606 GN=MYO5A PE=1 SV=1;tr|G3V394|G3V394_HUMAN Unconventional myosin-Va OS=Homo sapiens OX=9606 GN=MYO	4.39144	0.950786
1437	B3KX16;Q8NB01;B3KME2;O75718;B3KS71;C9JP16;B4DPA3;B3KUP0;B3KQR7;B4DVZ5;Q92791	Cartilage-associated protein	CRTAP	tr|B3KX16|B3KX16_HUMAN cDNA FLJ44469 fis, clone UTERU2026090, highly similar to Cartilage-associated protein OS=Homo sapiens OX=9606 PE=2 SV=1;tr|Q8NB01|Q8NB01_HUMAN cDNA FLJ34453 fis, clone HLUNG2002429, highly similar to Homo sapiens cartilage-associated	21.2668	0.9347
3391	Q9Y2Z4;H0YHS6	Tyrosine--tRNA ligase, mitochondrial;Tyrosine--tRNA ligase	YARS2	sp|Q9Y2Z4|SYYM_HUMAN Tyrosine--tRNA ligase, mitochondrial OS=Homo sapiens OX=9606 GN=YARS2 PE=1 SV=2;tr|H0YHS6|H0YHS6_HUMAN Tyrosine--tRNA ligase (Fragment) OS=Homo sapiens OX=9606 GN=YARS2 PE=1 SV=1	2.64486	1.59285
1274	A8K905;Q8WTT2;B4DXL4	Nucleolar complex protein 3 homolog	NOC3L	tr|A8K905|A8K905_HUMAN Nucleolar complex protein 3 homolog OS=Homo sapiens OX=9606 PE=2 SV=1;sp|Q8WTT2|NOC3L_HUMAN Nucleolar complex protein 3 homolog OS=Homo sapiens OX=9606 GN=NOC3L PE=1 SV=1;tr|B4DXL4|B4DXL4_HUMAN cDNA FLJ59781, highly similar to Nucleo	20.7632	0.751512
276	E9PS00;A0A024R564;Q9Y5Q0;B7Z345;Q59FV3;E9PKP8;E9PPZ4;E9PQC2;H0YED5;H0YCN1	Fatty acid desaturase 3	FADS3	tr|E9PS00|E9PS00_HUMAN Fatty acid desaturase 3 OS=Homo sapiens OX=9606 GN=FADS3 PE=1 SV=1;tr|A0A024R564|A0A024R564_HUMAN Fatty acid desaturase 3, isoform CRA_a OS=Homo sapiens OX=9606 GN=FADS3 PE=4 SV=1;sp|Q9Y5Q0|FADS3_HUMAN Fatty acid desaturase 3 OS=Homo	20.5077	0.684909
2055	J3QRG6;K7PML8;P42771;P42771-4;K7ES20;L8E941;K7ENC6;D1LYX3;P42771-2;K7PPU3;R9S252;P42772;Q2MJK0;Q208B5;P42771-3	Cyclin-dependent kinase inhibitor 2A;Cyclin-dependent kinase 4 inhibitor B	CDKN2A;CDKN2B;p16ink4a	tr|J3QRG6|J3QRG6_HUMAN Cyclin-dependent kinase inhibitor 2A OS=Homo sapiens OX=9606 GN=CDKN2A PE=1 SV=1;tr|K7PML8|K7PML8_HUMAN Cyclin-dependent kinase inhibitor 2A OS=Homo sapiens OX=9606 GN=CDKN2A PE=2 SV=1;sp|P42771|CDN2A_HUMAN Cyclin-dependent kinase in	21.4004	0.393569
441	A0A024R983;P10155-3;P10155-5;P10155-4;P10155;B3KN94;P10155-2;G5E9R9;H0Y9N5;D6RDN1;D6RE09	60 kDa SS-A/Ro ribonucleoprotein	TROVE2	tr|A0A024R983|A0A024R983_HUMAN TROVE domain family, member 2, isoform CRA_b OS=Homo sapiens OX=9606 GN=TROVE2 PE=4 SV=1;sp|P10155-3|RO60_HUMAN Isoform 3 of 60 kDa SS-A/Ro ribonucleoprotein OS=Homo sapiens OX=9606 GN=TROVE2;sp|P10155-5|RO60_HUMAN Isoform 5	0.40277	0.698844
3222	Q9H1C3;F8VZP2	Glycosyltransferase 8 domain-containing protein 2	GLT8D2	sp|Q9H1C3|GL8D2_HUMAN Glycosyltransferase 8 domain-containing protein 2 OS=Homo sapiens OX=9606 GN=GLT8D2 PE=2 SV=1	21.3636	2.22327
1411	Q05DQ7;B2RDG9;Q9NZ32;Q86TY2;V9GYX7;Q53HF6;Q53H79;G3V2Q5;G3V5Y4;F6S9Y6;Q86SY7;H0YJD9	Actin-related protein 10	ACTR10	tr|Q05DQ7|Q05DQ7_HUMAN ACTR10 protein (Fragment) OS=Homo sapiens OX=9606 GN=ACTR10 PE=2 SV=1;tr|B2RDG9|B2RDG9_HUMAN cDNA, FLJ96603, highly similar to Homo sapiens actin-related protein 10 homolog (S. cerevisiae) (ACTR10), mRNA OS=Homo sapiens OX=9606 PE=2	21.6849	1.98858
421	A0A024R8R4;Q8TAT6;Q8TAT6-2;B4DG89;A0A0D9SFI9;I3L4U9;I3L3I1	Nuclear protein localization protein 4 homolog	NPLOC4	tr|A0A024R8R4|A0A024R8R4_HUMAN Nuclear protein localization 4 homolog (S. cerevisiae), isoform CRA_a OS=Homo sapiens OX=9606 GN=NPLOC4 PE=4 SV=1;sp|Q8TAT6|NPL4_HUMAN Nuclear protein localization protein 4 homolog OS=Homo sapiens OX=9606 GN=NPLOC4 PE=1 SV=3	1.4663	0.813138
2209	Q1XBU8;O75925;O75925-2;A4ZVS8;A4ZVS7;O75925-3;H3BSI8;B4DGW0	E3 SUMO-protein ligase PIAS1	PIAS1	tr|Q1XBU8|Q1XBU8_HUMAN Cell proliferation-inducing protein 23 OS=Homo sapiens OX=9606 GN=PIAS1 PE=2 SV=1;sp|O75925|PIAS1_HUMAN E3 SUMO-protein ligase PIAS1 OS=Homo sapiens OX=9606 GN=PIAS1 PE=1 SV=2;sp|O75925-2|PIAS1_HUMAN Isoform 2 of E3 SUMO-protein liga	0.193667	0.528275
979	B3KQU6;A0A1U9X845;Q8IXM6;H0Y6T6;Q8IXM6-2;B4DP16	Nurim	NRM	tr|B3KQU6|B3KQU6_HUMAN cDNA PSEC0207 fis, clone HEMBA1002981, highly similar to Homo sapiens nurim (nuclear envelope membrane protein) (NRM), mRNA OS=Homo sapiens OX=9606 PE=2 SV=1;tr|A0A1U9X845|A0A1U9X845_HUMAN NRM OS=Homo sapiens OX=9606 PE=4 SV=1;sp|Q8I	22.4346	0.811839
1682	B5BUD2;P35250;Q75MT5;P35250-2;A0A087WVY3;H7C5P4;H7C5S7;H7C5P1;H7C5Q7;F8WC37;H7C5A0;H7C5G4;H7C596	Replication factor C subunit 2	RFC2	tr|B5BUD2|B5BUD2_HUMAN Replication factor C 2 isoform 1 (Fragment) OS=Homo sapiens OX=9606 GN=RFC2 PE=2 SV=1;sp|P35250|RFC2_HUMAN Replication factor C subunit 2 OS=Homo sapiens OX=9606 GN=RFC2 PE=1 SV=3;tr|Q75MT5|Q75MT5_HUMAN Replication factor C (Activato	0.00426088	0.527904
692	A0A087X2H1;Q9ULT8;G3V4V5;B3KWT6;H0YJD4;Q2KQ74;H0YJP0;Q5XJ19;Q9BRJ0;A0A087WVU6	E3 ubiquitin-protein ligase HECTD1	HECTD1	tr|A0A087X2H1|A0A087X2H1_HUMAN E3 ubiquitin-protein ligase HECTD1 OS=Homo sapiens OX=9606 GN=HECTD1 PE=1 SV=1;sp|Q9ULT8|HECD1_HUMAN E3 ubiquitin-protein ligase HECTD1 OS=Homo sapiens OX=9606 GN=HECTD1 PE=1 SV=3;tr|G3V4V5|G3V4V5_HUMAN E3 ubiquitin-protein l	2.42959	0.640764
912	J3QT28;A0A140VJF3;O43684-2;O43684;B4DDM6;J3QSX4	Mitotic checkpoint protein BUB3	BUB3	tr|J3QT28|J3QT28_HUMAN Mitotic checkpoint protein BUB3 (Fragment) OS=Homo sapiens OX=9606 GN=BUB3 PE=1 SV=1;tr|A0A140VJF3|A0A140VJF3_HUMAN Testicular tissue protein Li 27 OS=Homo sapiens OX=9606 PE=2 SV=1;sp|O43684-2|BUB3_HUMAN Isoform 2 of Mitotic checkpo	-1.92092	1.27149
318	Q6IBS5;A0A024R6C9;P36957;P36957-2;Q86TW7;Q86SW4;Q86TQ8;H0YJF9;G3V5M3;G3V3F0;B7Z6J1;YP_001654394.1	Dihydrolipoyllysine-residue succinyltransferase component of 2-oxoglutarate dehydrogenase complex, mitochondrial	DLST	tr|Q6IBS5|Q6IBS5_HUMAN DLST protein OS=Homo sapiens OX=9606 GN=DLST PE=2 SV=1;tr|A0A024R6C9|A0A024R6C9_HUMAN Dihydrolipoamide S-succinyltransferase (E2 component of 2-oxo-glutarate complex), isoform CRA_a OS=Homo sapiens OX=9606 GN=DLST PE=4 SV=1;sp|P36957	21.0737	0.810913
346	B2R6H7;A0A024R794;Q9Y5L0-3;Q9Y5L0;C9J7E5;Q9Y5L0-1;E9PFH4;Q9Y5L0-5;B3KMX1;B3KM69	Transportin-3	TNPO3	tr|B2R6H7|B2R6H7_HUMAN cDNA, FLJ92955, highly similar to Homo sapiens transportin-SR (TRN-SR), mRNA OS=Homo sapiens OX=9606 PE=2 SV=1;tr|A0A024R794|A0A024R794_HUMAN Transportin 3, isoform CRA_b OS=Homo sapiens OX=9606 GN=TNPO3 PE=4 SV=1;sp|Q9Y5L0-3|TNPO3_H	-1.22917	1.70288
471	A0A2R8Y7W5;A0A2R8Y4Z0;A0A024RA66;A0A024RA85;Q14004-2;Q14004;A0A087X209;A0A2R8YD28;A0A2R8YF61;A0A2R8Y644;Q9BVE2;A0A2R8YCQ1;A0A2R8YEB7;A0A2R8Y7Y0;A0A2R8YFE7	Cyclin-dependent kinase 13	CDC2L5;CDK13	tr|A0A2R8Y7W5|A0A2R8Y7W5_HUMAN Cyclin-dependent kinase 13 (Fragment) OS=Homo sapiens OX=9606 GN=CDK13 PE=1 SV=1;tr|A0A2R8Y4Z0|A0A2R8Y4Z0_HUMAN Cyclin-dependent kinase 13 (Fragment) OS=Homo sapiens OX=9606 GN=CDK13 PE=1 SV=1;tr|A0A024RA66|A0A024RA66_HUMAN C	2.50145	1.45642
1962	G8JLD5;O00429-4;O00429-5;O00429-3;O00429-2;O00429;O00429-8;O00429-6;D3DUW7;D3DUW6;B4DYR6;D3DUW5;Q32Q67;O00429-7;F8VZ52;B4DPZ9;F8W1W3;F8VUJ9;B4DDQ3;F8VR28;F8VYL3;H0YI79;H0YHY4	Dynamin-1-like protein	DNM1L	tr|G8JLD5|G8JLD5_HUMAN Dynamin-1-like protein OS=Homo sapiens OX=9606 GN=DNM1L PE=1 SV=1;sp|O00429-4|DNM1L_HUMAN Isoform 3 of Dynamin-1-like protein OS=Homo sapiens OX=9606 GN=DNM1L;sp|O00429-5|DNM1L_HUMAN Isoform 5 of Dynamin-1-like protein OS=Homo sapien	2.25951	1.90844
2660	Q13045;Q13045-2;Q13045-3;B4DIX0;Q59H95;J3KS54;J3QQQ2;J3QQU5;B4DNA8;J3QLR6;K7EP37;K7EP27;K7EQZ7;J3KT47;J3KS39	Protein flightless-1 homolog	FLII	sp|Q13045|FLII_HUMAN Protein flightless-1 homolog OS=Homo sapiens OX=9606 GN=FLII PE=1 SV=2;sp|Q13045-2|FLII_HUMAN Isoform 2 of Protein flightless-1 homolog OS=Homo sapiens OX=9606 GN=FLII;sp|Q13045-3|FLII_HUMAN Isoform 3 of Protein flightless-1 homolog OS	0.123768	0.513205
2747	Q15717;Q15717-2;M0QZR9;M0R055;B1AM48;B7Z5E0;B1APY9;B1APY8;A0A0A0MRX1;A0A0R4J2E6;Q12926-2;Q12926;P26378-4;P26378-2;P26378-5;P26378;P26378-3	ELAV-like protein 1	ELAVL1	sp|Q15717|ELAV1_HUMAN ELAV-like protein 1 OS=Homo sapiens OX=9606 GN=ELAVL1 PE=1 SV=2;sp|Q15717-2|ELAV1_HUMAN Isoform 2 of ELAV-like protein 1 OS=Homo sapiens OX=9606 GN=ELAVL1	0.754345	0.651639
2454	P47897;Q53HS0;A8K3A8;P47897-2;B4DNN3;A0A1B0GVU9;Q96AW5;Q9BUZ3;B4DDN1;Q9H3A5;H7C0R3;C9J165;A0A0U1RQT0;A0A0U1RRI9;A0A0U1RQE9;B7Z840;A0A0U1RQM8;A0A0U1RQL2;A0A0U1RQU2;A0A0U1RQQ5;A0A0U1RQX5;B4DTH6;A0A0U1RR66;A0A1B0GTT3;A0A0U1RQX9;A0A0U1RRC8;A0A0U1RRJ7;A0A0U1RQJ6;F2Z2V6;I3QNU8;A0A0U1RQC3;A0A0U1RR79	Glutamine--tRNA ligase	QARS	sp|P47897|SYQ_HUMAN Glutamine--tRNA ligase OS=Homo sapiens OX=9606 GN=QARS PE=1 SV=1;tr|Q53HS0|Q53HS0_HUMAN Glutaminyl-tRNA synthetase variant (Fragment) OS=Homo sapiens OX=9606 PE=2 SV=1;tr|A8K3A8|A8K3A8_HUMAN cDNA FLJ75085, highly similar to Homo sapiens	-2.29926	0.738024
1392	Q8NBL9;B2RBB2;Q96S52;Q96S52-2;Q96IR5;B4DLL0;Q9BVC1;A0A024QZ14;Q96NG1;Q6MZW5;B3KXD2;K7EN97	GPI transamidase component PIG-S	PIGS	tr|Q8NBL9|Q8NBL9_HUMAN cDNA PSEC0119 fis, clone PLACE1002376, highly similar to GPI transamidase component PIG-S OS=Homo sapiens OX=9606 PE=2 SV=1;tr|B2RBB2|B2RBB2_HUMAN cDNA, FLJ95416, highly similar to Homo sapiens phosphatidylinositol glycan, class S (P	0.571171	0.948111
2655	Q4KMR3;Q12965;H0YNQ8;H0YLE5;Q6ZNI9;O00160;Q14779;B4DVP3;H0YLJ4;Q92827;B0I1T1;Q4LE34	Unconventional myosin-Ie	MYO1E	tr|Q4KMR3|Q4KMR3_HUMAN MYO1E variant protein OS=Homo sapiens OX=9606 GN=MYO1E PE=2 SV=1;sp|Q12965|MYO1E_HUMAN Unconventional myosin-Ie OS=Homo sapiens OX=9606 GN=MYO1E PE=1 SV=2	-0.466426	0.352435
537	E9PIR7;B2R5P6;F8W809;B7Z2S5;A0A087WSW9;A0A182DWI3;A0A024RBK9;A0A140VKC9;A0A087WSY9;Q16881-5;Q16881-2;Q16881-4;Q16881-3;Q16881-6;Q16881;E2QRB9;Q6ZR44;Q16881-7;A0A0B4J225;E9PIZ5;E9PKD3;E9PLT3;E9PKI4;E9PQI3;Q6M1B7;A0A096LPD9;E7EWK1;A4FTY4;B3KUQ5;A0A096LPK7;Q17RE6;A0A182DWF2;D3YTF8;Q59ET7;A0A182DWF3;Q9NNW7-2;Q9NNW7	Thioredoxin reductase 1, cytoplasmic	TXNRD1	tr|E9PIR7|E9PIR7_HUMAN Thioredoxin reductase 1, cytoplasmic OS=Homo sapiens OX=9606 GN=TXNRD1 PE=1 SV=1;tr|B2R5P6|B2R5P6_HUMAN cDNA, FLJ92557, highly similar to Homo sapiens thioredoxin reductase 1 (TXNRD1), mRNA OS=Homo sapiens OX=9606 PE=2 SV=1;tr|F8W809	1.14957	0.90747
1879	E9PC52;Q6FHQ0;Q16576;Q16576-2;A8K6A2;Q5JP02;Q5JP01;C9J7L0;Q5JNZ6	Histone-binding protein RBBP7	RBBP7	tr|E9PC52|E9PC52_HUMAN Histone-binding protein RBBP7 OS=Homo sapiens OX=9606 GN=RBBP7 PE=1 SV=1;tr|Q6FHQ0|Q6FHQ0_HUMAN RBBP7 protein (Fragment) OS=Homo sapiens OX=9606 GN=RBBP7 PE=2 SV=1;sp|Q16576|RBBP7_HUMAN Histone-binding protein RBBP7 OS=Homo sapiens O	20.5451	0.454213
1116	A3RJH1;Q92499;F1T0B3;A0A087X2G1;Q92499-3;Q92499-2;B4DP70	ATP-dependent RNA helicase DDX1	DDX1	tr|A3RJH1|A3RJH1_HUMAN ATP-dependent RNA helicase DDX1 OS=Homo sapiens OX=9606 GN=DDX1 PE=2 SV=1;sp|Q92499|DDX1_HUMAN ATP-dependent RNA helicase DDX1 OS=Homo sapiens OX=9606 GN=DDX1 PE=1 SV=2;tr|F1T0B3|F1T0B3_HUMAN ATP-dependent RNA helicase DDX1 OS=Homo s	-7.73671	2.15636
972	A0A1L2BME7			tr|A0A1L2BME7|A0A1L2BME7_HUMAN MHC class I antigen (Fragment) OS=Homo sapiens OX=9606 GN=HLA-C PE=3 SV=1	21.5724	0.443594
835	B4DVE1;A0A0S2Z3Y1;Q08380;B4DI70;B4DWA8;B3KP88;B4DDG4;K7EJY8;K7ESM3;K7EKQ5;K7EP36	Galectin-3-binding protein	LGALS3BP	tr|B4DVE1|B4DVE1_HUMAN cDNA FLJ53478, highly similar to Galectin-3-binding protein OS=Homo sapiens OX=9606 PE=2 SV=1;tr|A0A0S2Z3Y1|A0A0S2Z3Y1_HUMAN Lectin galactoside-binding soluble 3 binding protein isoform 1 (Fragment) OS=Homo sapiens OX=9606 GN=LGALS3B	0.0493937	1.66481
2334	P15531;P15531-2;E5RHP0;C9K028	Nucleoside diphosphate kinase A	NME1	sp|P15531|NDKA_HUMAN Nucleoside diphosphate kinase A OS=Homo sapiens OX=9606 GN=NME1 PE=1 SV=1;sp|P15531-2|NDKA_HUMAN Isoform 2 of Nucleoside diphosphate kinase A OS=Homo sapiens OX=9606 GN=NME1	21.7007	1.27581
3212	Q9BYX2-3;Q9BYX2;Q9BYX2-4;Q9BYX2-2;A0A024R166;B3KY99;Q9BYX2-6;Q9BYX2-5	TBC1 domain family member 2A	TBC1D2	sp|Q9BYX2-3|TBD2A_HUMAN Isoform 3 of TBC1 domain family member 2A OS=Homo sapiens OX=9606 GN=TBC1D2;sp|Q9BYX2|TBD2A_HUMAN TBC1 domain family member 2A OS=Homo sapiens OX=9606 GN=TBC1D2 PE=1 SV=3;sp|Q9BYX2-4|TBD2A_HUMAN Isoform 4 of TBC1 domain family membe	3.39108	1.07618
3080	Q8TF74;A0A024R1X2;Q8TF74-2;A8MWR2;J3KSA3	WAS/WASL-interacting protein family member 2	WIPF2;WIRE	sp|Q8TF74|WIPF2_HUMAN WAS/WASL-interacting protein family member 2 OS=Homo sapiens OX=9606 GN=WIPF2 PE=1 SV=1;tr|A0A024R1X2|A0A024R1X2_HUMAN WIRE protein, isoform CRA_a OS=Homo sapiens OX=9606 GN=WIRE PE=4 SV=1;sp|Q8TF74-2|WIPF2_HUMAN Isoform 2 of WAS/WASL	0.0980785	0.567771
2225	Q6FI36;O95147	Dual specificity protein phosphatase 14	DUSP14	tr|Q6FI36|Q6FI36_HUMAN DUSP14 protein OS=Homo sapiens OX=9606 GN=DUSP14 PE=1 SV=1;sp|O95147|DUS14_HUMAN Dual specificity protein phosphatase 14 OS=Homo sapiens OX=9606 GN=DUSP14 PE=1 SV=1	2.30379	0.734696
2769	Q29947;Q29945		HLA-A	tr|Q29947|Q29947_HUMAN HLA-A protein (Fragment) OS=Homo sapiens OX=9606 GN=HLA-A PE=2 SV=1;tr|Q29945|Q29945_HUMAN MHC class I HLA-A cell surface antigen (Fragment) OS=Homo sapiens OX=9606 PE=2 SV=1	0.169857	0.742257
730	A0A0A0MSB8;Q9UPT5-2;Q9UPT5-5;Q9UPT5-1;Q9UPT5-6;Q9UPT5;Q5G0E1;A0A0A0MRE1;B4DJ07;B5MCY9;K7ERQ5;Q63HP7;Q9UPT5-4;C9JME6;C9JKC2	Exocyst complex component 7	EXOC7;DKFZp686P1551	tr|A0A0A0MSB8|A0A0A0MSB8_HUMAN Exocyst complex component 7 OS=Homo sapiens OX=9606 GN=EXOC7 PE=1 SV=1;sp|Q9UPT5-2|EXOC7_HUMAN Isoform 2 of Exocyst complex component 7 OS=Homo sapiens OX=9606 GN=EXOC7;sp|Q9UPT5-5|EXOC7_HUMAN Isoform 5 of Exocyst complex com	3.36996	0.586117
3217	Q9H061;E9PI90;Q9H061-2;E9PIH8	Transmembrane protein 126A	TMEM126A	sp|Q9H061|T126A_HUMAN Transmembrane protein 126A OS=Homo sapiens OX=9606 GN=TMEM126A PE=1 SV=1;tr|E9PI90|E9PI90_HUMAN Transmembrane protein 126A OS=Homo sapiens OX=9606 GN=TMEM126A PE=1 SV=1;sp|Q9H061-2|T126A_HUMAN Isoform 2 of Transmembrane protein 126A O	21.2632	0.449843
1752	C9J4Z3;P61513;M0R0A1;Q6P4E4;E9PEL3;M0R2L6;G5E9R3;A6NKH3	60S ribosomal protein L37a	RPL37A	tr|C9J4Z3|C9J4Z3_HUMAN 60S ribosomal protein L37a OS=Homo sapiens OX=9606 GN=RPL37A PE=1 SV=1;sp|P61513|RL37A_HUMAN 60S ribosomal protein L37a OS=Homo sapiens OX=9606 GN=RPL37A PE=1 SV=2;tr|M0R0A1|M0R0A1_HUMAN 60S ribosomal protein L37a OS=Homo sapiens OX=	-1.0437	1.08632
2673	Q13427;Q32LZ0;Q2NKQ6;E9PG73;Q13427-2;C9JN15;Q6P432;C9JM79;C9JT64;C9J679	Peptidyl-prolyl cis-trans isomerase G;Peptidyl-prolyl cis-trans isomerase	PPIG	sp|Q13427|PPIG_HUMAN Peptidyl-prolyl cis-trans isomerase G OS=Homo sapiens OX=9606 GN=PPIG PE=1 SV=2;tr|Q32LZ0|Q32LZ0_HUMAN PPIG protein (Fragment) OS=Homo sapiens OX=9606 GN=PPIG PE=2 SV=1;tr|Q2NKQ6|Q2NKQ6_HUMAN PPIG protein OS=Homo sapiens OX=9606 GN=PPI	-0.993812	0.335223
2008	H7C0X4;Q92685;B4DS50;C9J7S5;Q92685-2;F8WF93;H7BZZ2;F8WE30	Dol-P-Man:Man(5)GlcNAc(2)-PP-Dol alpha-1,3-mannosyltransferase	ALG3	tr|H7C0X4|H7C0X4_HUMAN Dol-P-Man:Man(5)GlcNAc(2)-PP-Dol alpha-1,3-mannosyltransferase (Fragment) OS=Homo sapiens OX=9606 GN=ALG3 PE=1 SV=1;sp|Q92685|ALG3_HUMAN Dol-P-Man:Man(5)GlcNAc(2)-PP-Dol alpha-1,3-mannosyltransferase OS=Homo sapiens OX=9606 GN=ALG3 P	20.7927	0.594312
2485	P51398-2;P51398-3;P51398;V9GYL9;V9GZ03;V9GYJ9;V9GZ61;V9GYW1;V9GYA7;E2JL21;V9GYF7;V9GYC9;V9GYJ3;V9GY11	28S ribosomal protein S29, mitochondrial	DAP3	sp|P51398-2|RT29_HUMAN Isoform 2 of 28S ribosomal protein S29, mitochondrial OS=Homo sapiens OX=9606 GN=DAP3;sp|P51398-3|RT29_HUMAN Isoform 3 of 28S ribosomal protein S29, mitochondrial OS=Homo sapiens OX=9606 GN=DAP3;sp|P51398|RT29_HUMAN 28S ribosomal pro	20.4768	0.60206
497	B4DMD3;B4DY34;A0A024RAW9;Q9Y2W2;F5H5G4;F5GXS9	WW domain-binding protein 11	WBP11	tr|B4DMD3|B4DMD3_HUMAN cDNA FLJ58174, highly similar to WW domain-binding protein 11 OS=Homo sapiens OX=9606 PE=2 SV=1;tr|B4DY34|B4DY34_HUMAN cDNA FLJ60194, highly similar to WW domain-binding protein 11 OS=Homo sapiens OX=9606 PE=2 SV=1;tr|A0A024RAW9|A0A0	-3.48499	0.858063
3126	Q96BN8	Ubiquitin thioesterase otulin	OTULIN	sp|Q96BN8|OTUL_HUMAN Ubiquitin thioesterase otulin OS=Homo sapiens OX=9606 GN=OTULIN PE=1 SV=3	-0.0326983	0.354603
3247	Q9H7Z7;B3KPZ2;B4DWP1;A6NHH0;X6RJ95	Prostaglandin E synthase 2;Prostaglandin E synthase 2 truncated form	PTGES2	sp|Q9H7Z7|PGES2_HUMAN Prostaglandin E synthase 2 OS=Homo sapiens OX=9606 GN=PTGES2 PE=1 SV=1;tr|B3KPZ2|B3KPZ2_HUMAN cDNA FLJ32487 fis, clone SKNSH1000002, highly similar to Prostaglandin E synthase 2 OS=Homo sapiens OX=9606 PE=2 SV=1	21.7495	1.36051
2374	P24390;Q96H29;M0R1Y2;P24390-2	ER lumen protein-retaining receptor 1;ER lumen protein-retaining receptor	KDELR1	sp|P24390|ERD21_HUMAN ER lumen protein-retaining receptor 1 OS=Homo sapiens OX=9606 GN=KDELR1 PE=1 SV=1;tr|Q96H29|Q96H29_HUMAN ER lumen protein-retaining receptor OS=Homo sapiens OX=9606 PE=2 SV=1;tr|M0R1Y2|M0R1Y2_HUMAN ER lumen protein-retaining receptor	22.099	0.38589
348	K7ES61;A0A024R7C5;Q9BYD3;X6RAY8;Q9BYD3-2;K7EKI4;K7ELF1;K7ELQ0	39S ribosomal protein L4, mitochondrial	MRPL4	tr|K7ES61|K7ES61_HUMAN 39S ribosomal protein L4, mitochondrial (Fragment) OS=Homo sapiens OX=9606 GN=MRPL4 PE=1 SV=1;tr|A0A024R7C5|A0A024R7C5_HUMAN Mitochondrial ribosomal protein L4, isoform CRA_a OS=Homo sapiens OX=9606 GN=MRPL4 PE=3 SV=1;sp|Q9BYD3|RM04_	3.04017	0.68782
2511	P55039;A8MZF9;Q59FW9;J3QRI9;J3QKW7;J3QR71;B4DMP8;J3QL90;J3KRL5;B4DIG2;J3QKV7	Developmentally-regulated GTP-binding protein 2	DRG2	sp|P55039|DRG2_HUMAN Developmentally-regulated GTP-binding protein 2 OS=Homo sapiens OX=9606 GN=DRG2 PE=1 SV=1;tr|A8MZF9|A8MZF9_HUMAN Developmentally-regulated GTP-binding protein 2 OS=Homo sapiens OX=9606 GN=DRG2 PE=1 SV=1;tr|Q59FW9|Q59FW9_HUMAN Developme	21.0588	0.486067
2074	K7EQ03;K7EP90;Q9BTD8-4;Q9BTD8-2;Q9BTD8-3;Q9BTD8;K7ER08;K7EML2	RNA-binding protein 42	RBM42	tr|K7EQ03|K7EQ03_HUMAN RNA-binding protein 42 OS=Homo sapiens OX=9606 GN=RBM42 PE=1 SV=1;tr|K7EP90|K7EP90_HUMAN RNA-binding protein 42 OS=Homo sapiens OX=9606 GN=RBM42 PE=1 SV=1;sp|Q9BTD8-4|RBM42_HUMAN Isoform 4 of RNA-binding protein 42 OS=Homo sapiens OX	-0.47445	0.352994
1891	E9PK85;P62070-3;P62070;P62070-4;P62070-2	Ras-related protein R-Ras2	RRAS2	tr|E9PK85|E9PK85_HUMAN Ras-related protein R-Ras2 (Fragment) OS=Homo sapiens OX=9606 GN=RRAS2 PE=1 SV=1;sp|P62070-3|RRAS2_HUMAN Isoform 3 of Ras-related protein R-Ras2 OS=Homo sapiens OX=9606 GN=RRAS2;sp|P62070|RRAS2_HUMAN Ras-related protein R-Ras2 OS=Hom	20.4987	0.60206
2990	Q86Y56;Q86Y56-2;H0Y650;B3KU91;E9PGY2;B3KNN3;B3KPE2;A0A024R803;Q86Y56-3;H7C3B1	Dynein assembly factor 5, axonemal	DNAAF5	sp|Q86Y56|DAAF5_HUMAN Dynein assembly factor 5, axonemal OS=Homo sapiens OX=9606 GN=DNAAF5 PE=1 SV=4;sp|Q86Y56-2|DAAF5_HUMAN Isoform 2 of Dynein assembly factor 5, axonemal OS=Homo sapiens OX=9606 GN=DNAAF5;tr|H0Y650|H0Y650_HUMAN Dynein assembly factor 5,	-0.846189	1.05891
2120	O14929;O14929-2	Histone acetyltransferase type B catalytic subunit	HAT1	sp|O14929|HAT1_HUMAN Histone acetyltransferase type B catalytic subunit OS=Homo sapiens OX=9606 GN=HAT1 PE=1 SV=1;sp|O14929-2|HAT1_HUMAN Isoform B of Histone acetyltransferase type B catalytic subunit OS=Homo sapiens OX=9606 GN=HAT1	0.658515	0.551369
2834	Q8NBT6;Q5JPC1;Q9HC21-2;Q9HC21;J3KRY6;J3KSI7;J3QL84;J3KS44;J3QLV3;J3KSB1;J3KTL0	Mitochondrial thiamine pyrophosphate carrier	DKFZp667O1614;SLC25A19	tr|Q8NBT6|Q8NBT6_HUMAN cDNA FLJ90758 fis, clone SKNMC1000082, highly similar to Mitochondrial deoxynucleotide carrier OS=Homo sapiens OX=9606 PE=2 SV=1;tr|Q5JPC1|Q5JPC1_HUMAN Solute carrier family 25 (Mitochondrial deoxynucleotide carrier), member 19, isof	2.85736	0.648077
2481	P50570-2;P50570-5;P50570;P50570-3;P50570-4;Q59G96;B4DJ53;K7EMQ3;Q6ZV85;Q6ZTU8;A0A1B0GU67;Q9UPH5;Q6ZSZ9;A0A024R7C9;Q8N1K8;Q59GI5;B3KUU8;E5RHK8;B4DHH5;A0A0D9SFB1;B7ZAC0;B4DK06;A0A0U1RQP1;A0A0D9SFE4;Q05193-5;Q05193-3;Q9UQ16-2;Q9UQ16-3;Q05193-2;Q05193;Q9UQ16;Q9UQ16-4;H7C5U0;A0A1B0GUX5;E5RIK2;B3KPF2;Q9UQ16-5	Dynamin-2	DNM2	sp|P50570-2|DYN2_HUMAN Isoform 2 of Dynamin-2 OS=Homo sapiens OX=9606 GN=DNM2;sp|P50570-5|DYN2_HUMAN Isoform 5 of Dynamin-2 OS=Homo sapiens OX=9606 GN=DNM2;sp|P50570|DYN2_HUMAN Dynamin-2 OS=Homo sapiens OX=9606 GN=DNM2 PE=1 SV=2;sp|P50570-3|DYN2_HUMAN Isof	-0.736959	0.708566
3206	Q9BXW7-2;Q9BXW7;B3KVW8;A8MYZ9	Cat eye syndrome critical region protein 5	CECR5	sp|Q9BXW7-2|HDHD5_HUMAN Isoform 1 of Haloacid dehalogenase-like hydrolase domain-containing 5 OS=Homo sapiens OX=9606 GN=HDHD5;sp|Q9BXW7|HDHD5_HUMAN Haloacid dehalogenase-like hydrolase domain-containing 5 OS=Homo sapiens OX=9606 GN=HDHD5 PE=1 SV=1	20.5153	0.60206
1399	Q53F98;B2RBY4;P49642;F8VNY2;H0YIP2;F8VSB2	DNA primase;DNA primase small subunit	PRIM1	tr|Q53F98|Q53F98_HUMAN DNA primase (Fragment) OS=Homo sapiens OX=9606 PE=2 SV=1;tr|B2RBY4|B2RBY4_HUMAN DNA primase OS=Homo sapiens OX=9606 PE=2 SV=1;sp|P49642|PRI1_HUMAN DNA primase small subunit OS=Homo sapiens OX=9606 GN=PRIM1 PE=1 SV=1;tr|F8VNY2|F8VNY2_	1.23201	0.499112
1370	B2R841;P53350;B4E083;Q59GD0;D3DWF3;Q58A51;I3L2H5;I3L309;I3L387	Serine/threonine-protein kinase PLK;Serine/threonine-protein kinase PLK1	PLK1	tr|B2R841|B2R841_HUMAN Serine/threonine-protein kinase PLK OS=Homo sapiens OX=9606 PE=2 SV=1;sp|P53350|PLK1_HUMAN Serine/threonine-protein kinase PLK1 OS=Homo sapiens OX=9606 GN=PLK1 PE=1 SV=1;tr|B4E083|B4E083_HUMAN cDNA FLJ51423, highly similar to Serine/	0.525383	0.914482
111	Q8NCD8;A0A024R124;F8VX04;Q9H2H9	Sodium-coupled neutral amino acid transporter 1	SLC38A1	tr|Q8NCD8|Q8NCD8_HUMAN cDNA FLJ90316 fis, clone NT2RP2001495, weakly similar to Human transporter protein (g17) OS=Homo sapiens OX=9606 PE=2 SV=1;tr|A0A024R124|A0A024R124_HUMAN Solute carrier family 38, member 1, isoform CRA_a OS=Homo sapiens OX=9606 GN=SL	-0.411579	0.804193
2762	Q16880;D6RFW2;B4DG70	2-hydroxyacylsphingosine 1-beta-galactosyltransferase	UGT8	sp|Q16880|CGT_HUMAN 2-hydroxyacylsphingosine 1-beta-galactosyltransferase OS=Homo sapiens OX=9606 GN=UGT8 PE=2 SV=2	2.40578	0.689684
2667	Q5U0Q1;Q13283;Q6FI03;Q32P45;Q6ZP53;B7Z8K4;E5RIZ6;E5RH42;E5RJU8;Q13283-2;E5RIF8;E5RI46;E5RH00	Ras GTPase-activating protein-binding protein 1	DKFZp686L1159;G3BP1;G3BP	tr|Q5U0Q1|Q5U0Q1_HUMAN Ras-GTPase-activating protein SH3-domain-binding protein OS=Homo sapiens OX=9606 GN=DKFZp686L1159 PE=2 SV=1;sp|Q13283|G3BP1_HUMAN Ras GTPase-activating protein-binding protein 1 OS=Homo sapiens OX=9606 GN=G3BP1 PE=1 SV=1;tr|Q6FI03|Q6	-6.83744	1.09922
996	A0A1W2PR06;P52569;P52569-2;P52569-3	Cationic amino acid transporter 2	SLC7A2	tr|A0A1W2PR06|A0A1W2PR06_HUMAN Cationic amino acid transporter 2 (Fragment) OS=Homo sapiens OX=9606 GN=SLC7A2 PE=1 SV=1;sp|P52569|CTR2_HUMAN Cationic amino acid transporter 2 OS=Homo sapiens OX=9606 GN=SLC7A2 PE=1 SV=2;sp|P52569-2|CTR2_HUMAN Isoform 2 of C	-0.369827	0.437759
1115	B2R984;A3R0T8;P10412;Q4VB24;A3R0T7	Histone H1.4	HIST1H1E	tr|B2R984|B2R984_HUMAN cDNA, FLJ94268, highly similar to Homo sapiens histone 1, H1e (HIST1H1E), mRNA OS=Homo sapiens OX=9606 PE=2 SV=1;tr|A3R0T8|A3R0T8_HUMAN Histone 1, H1e OS=Homo sapiens OX=9606 GN=HIST1H1E PE=2 SV=1;sp|P10412|H14_HUMAN Histone H1.4 OS=	-2.32476	1.17616
1929	F8VPD4;P27708;Q53SY7;H7C2E4;H7C3Z5;G1UI39;H7BZB3;Q53SZ4	CAD protein;Glutamine-dependent carbamoyl-phosphate synthase;Aspartate carbamoyltransferase;Dihydroorotase	CAD	tr|F8VPD4|F8VPD4_HUMAN CAD protein OS=Homo sapiens OX=9606 GN=CAD PE=1 SV=1;sp|P27708|PYR1_HUMAN CAD protein OS=Homo sapiens OX=9606 GN=CAD PE=1 SV=3;tr|Q53SY7|Q53SY7_HUMAN Uncharacterized protein CAD (Fragment) OS=Homo sapiens OX=9606 GN=CAD PE=3 SV=1	-1.07945	0.930506
674	Q5BKY2;A0A087WZK9;Q6IB98;Q53HR0;Q53HG0;B3KS98;O15372;E5RJT0	Eukaryotic translation initiation factor 3 subunit H	EIF3H;EIF3S3	tr|Q5BKY2|Q5BKY2_HUMAN Eukaryotic translation initiation factor 3 subunit H OS=Homo sapiens OX=9606 GN=EIF3H PE=2 SV=1;tr|A0A087WZK9|A0A087WZK9_HUMAN Eukaryotic translation initiation factor 3 subunit H OS=Homo sapiens OX=9606 GN=EIF3H PE=1 SV=1;tr|Q6IB98|	21.4201	1.53202
2395	P28074;A0A140VJS7;P28074-3;H0YJM8;P28074-2	Proteasome subunit beta type-5	PSMB5	sp|P28074|PSB5_HUMAN Proteasome subunit beta type-5 OS=Homo sapiens OX=9606 GN=PSMB5 PE=1 SV=3;tr|A0A140VJS7|A0A140VJS7_HUMAN Testicular tissue protein Li 153 OS=Homo sapiens OX=9606 PE=2 SV=1;sp|P28074-3|PSB5_HUMAN Isoform 3 of Proteasome subunit beta typ	0.908939	0.696347
717	A0A0A0MRN5;Q05BV5;B3KMQ6;Q9NZT2-2;Q9NZT2;V9H0E3;Q6PK21;A0A087X028;V9H0H8;Q4VXW3	Opioid growth factor receptor	OGFR	tr|A0A0A0MRN5|A0A0A0MRN5_HUMAN Opioid growth factor receptor, isoform CRA_d OS=Homo sapiens OX=9606 GN=OGFR PE=1 SV=1;tr|Q05BV5|Q05BV5_HUMAN OGFR protein OS=Homo sapiens OX=9606 GN=OGFR PE=2 SV=1;tr|B3KMQ6|B3KMQ6_HUMAN cDNA FLJ12172 fis, clone MAMMA1000684	21.2441	1.08997
277	A0A024R565;Q9UI30;F5GYQ2;F5GX77;Q9UI30-2	Multifunctional methyltransferase subunit TRM112-like protein	HSPC152;TRMT112	tr|A0A024R565|A0A024R565_HUMAN Uncharacterized protein OS=Homo sapiens OX=9606 GN=HSPC152 PE=4 SV=1;sp|Q9UI30|TR112_HUMAN Multifunctional methyltransferase subunit TRM112-like protein OS=Homo sapiens OX=9606 GN=TRMT112 PE=1 SV=1;tr|F5GYQ2|F5GYQ2_HUMAN Mult	-0.0315679	0.474545
1382	B2RA70;J3QRU1;P07947;Q9H7V3;B3KPS6;P06241-3;P06241-2;P12931;P06241;P12931-2;Q9P134;B3KUV3;A0A0S2Z3Y4;A8K4G3;A0A0S2Z3Y8;Q573B4;H0Y3C5;J3KPD6;F6SF04;B4DZS7;A0A0S2Z3T3;P08631-3;P08631-2;P06239;P08631-4;P08631;P06239-3	Non-specific protein-tyrosine kinase;Tyrosine-protein kinase Yes;Tyrosine-protein kinase Fyn;Proto-oncogene tyrosine-protein kinase Src	YES1;FYN;SRC	tr|B2RA70|B2RA70_HUMAN Tyrosine-protein kinase OS=Homo sapiens OX=9606 PE=2 SV=1;tr|J3QRU1|J3QRU1_HUMAN Tyrosine-protein kinase OS=Homo sapiens OX=9606 GN=YES1 PE=1 SV=1;sp|P07947|YES_HUMAN Tyrosine-protein kinase Yes OS=Homo sapiens OX=9606 GN=YES1 PE=1 S	20.5834	0.381555
260	Q0QF37;Q75MT9;Q6FHZ0;A0A024R4K3;P40926;P40926-2;G3XAL0;B3KTM1	Malate dehydrogenase;Malate dehydrogenase, mitochondrial	MDH2	tr|Q0QF37|Q0QF37_HUMAN Malate dehydrogenase (Fragment) OS=Homo sapiens OX=9606 GN=MDH2 PE=2 SV=1;tr|Q75MT9|Q75MT9_HUMAN Malate dehydrogenase (Fragment) OS=Homo sapiens OX=9606 GN=MDH2 PE=3 SV=1;tr|Q6FHZ0|Q6FHZ0_HUMAN Malate dehydrogenase OS=Homo sapiens OX	20.8093	0.705055
2626	Q05DF2;Q15428;K7EMT0	Splicing factor 3A subunit 2	SF3A2	tr|Q05DF2|Q05DF2_HUMAN SF3A2 protein (Fragment) OS=Homo sapiens OX=9606 GN=SF3A2 PE=2 SV=1;sp|Q15428|SF3A2_HUMAN Splicing factor 3A subunit 2 OS=Homo sapiens OX=9606 GN=SF3A2 PE=1 SV=2	-1.01127	0.304235
173	A8K5D8;A8K4G7;A0A024R2C5;O75351;Q6PJZ4;K7EL71;K7EKZ3	Vacuolar protein sorting-associated protein 4B	VPS4B	tr|A8K5D8|A8K5D8_HUMAN cDNA FLJ75934, highly similar to Homo sapiens vacuolar protein sorting 4B (yeast) (VPS4B), mRNA OS=Homo sapiens OX=9606 PE=2 SV=1;tr|A8K4G7|A8K4G7_HUMAN cDNA FLJ78528, highly similar to Homo sapiens vacuolar protein sorting 4B (yeast	0.506674	0.413768
493	A3KPC7;A0A024RAS2;A4FTV9;A0A0U1RR32;A0A0U1RRH7;Q99878;Q96KK5;Q9BTM1;P20671;P0C0S8;B2R5B6;B2R5B3;Q9BTM1-2;H0YFX9;B4E0B3;Q08AJ9;A0A024R017;Q93077;Q7L7L0;P04908;P16104;Q96QV6	Histone H2A;Histone H2A type 1-J;Histone H2A type 1-H;Histone H2A.J;Histone H2A type 1-D;Histone H2A type 1;Histone H2A type 1-C;Histone H2A type 3;Histone H2A type 1-B/E;Histone H2AX	HIST1H2AH;H2AFJ;HIST1H2AK;HIST1H2AJ;HIST1H2AD;HIST1H2AG;HIST1H2AB;HIST1H2AC;HIST3H2A;H2AFX	tr|A3KPC7|A3KPC7_HUMAN Histone H2A OS=Homo sapiens OX=9606 GN=HIST1H2AH PE=2 SV=1;tr|A0A024RAS2|A0A024RAS2_HUMAN Histone H2A OS=Homo sapiens OX=9606 GN=H2AFJ PE=3 SV=1;tr|A4FTV9|A4FTV9_HUMAN Histone H2A OS=Homo sapiens OX=9606 GN=HIST1H2AK PE=2 SV=1;tr|A0A	4.35736	0.611748
3408	Q9Y4C2-2;Q9Y4C2;B4DST7;B7Z246	TRPM8 channel-associated factor 1	TCAF1	sp|Q9Y4C2-2|TCAF1_HUMAN Isoform 2 of TRPM8 channel-associated factor 1 OS=Homo sapiens OX=9606 GN=TCAF1;sp|Q9Y4C2|TCAF1_HUMAN TRPM8 channel-associated factor 1 OS=Homo sapiens OX=9606 GN=TCAF1 PE=1 SV=3;tr|B4DST7|B4DST7_HUMAN cDNA FLJ58406, weakly similar	-0.636419	0.787712
3190	Q9BU76-4;Q9BU76;Q9BU76-3;Q9BU76-2	Multiple myeloma tumor-associated protein 2	MMTAG2	sp|Q9BU76-4|MMTA2_HUMAN Isoform 4 of Multiple myeloma tumor-associated protein 2 OS=Homo sapiens OX=9606 GN=MMTAG2;sp|Q9BU76|MMTA2_HUMAN Multiple myeloma tumor-associated protein 2 OS=Homo sapiens OX=9606 GN=MMTAG2 PE=1 SV=1;sp|Q9BU76-3|MMTA2_HUMAN Isoform	-1.15106	1.12929
3147	Q96HV5;H7BXL1;F8WDE2	Transmembrane protein 41A	TMEM41A	sp|Q96HV5|TM41A_HUMAN Transmembrane protein 41A OS=Homo sapiens OX=9606 GN=TMEM41A PE=1 SV=1	1.71869	1.11691
1850	E5KNY5;P42704;B4DSR0;B8ZZ38;A0A0C4DG06;C9JCA9;H7C3W8	Leucine-rich PPR motif-containing protein, mitochondrial	LRPPRC	tr|E5KNY5|E5KNY5_HUMAN Leucine-rich PPR-motif containing OS=Homo sapiens OX=9606 GN=LRPPRC PE=4 SV=1;sp|P42704|LPPRC_HUMAN Leucine-rich PPR motif-containing protein, mitochondrial OS=Homo sapiens OX=9606 GN=LRPPRC PE=1 SV=3;tr|B4DSR0|B4DSR0_HUMAN cDNA FLJ6	0.894101	1.05911
3411	Q9Y4W2-2;Q9Y4W2;Q9Y4W2-3;Q9Y4W2-4;B7Z381;B3KUJ7;B3KNR6;Q6ZNR3	Ribosomal biogenesis protein LAS1L	LAS1L	sp|Q9Y4W2-2|LAS1L_HUMAN Isoform 2 of Ribosomal biogenesis protein LAS1L OS=Homo sapiens OX=9606 GN=LAS1L;sp|Q9Y4W2|LAS1L_HUMAN Ribosomal biogenesis protein LAS1L OS=Homo sapiens OX=9606 GN=LAS1L PE=1 SV=2;sp|Q9Y4W2-3|LAS1L_HUMAN Isoform 3 of Ribosomal biog	0.982621	0.746741
544	A0A024RBU0;Q9H9H4;F5H4M0;F5H1F6	Vacuolar protein sorting-associated protein 37B	VPS37B	tr|A0A024RBU0|A0A024RBU0_HUMAN Vacuolar protein sorting 37B (Yeast), isoform CRA_b OS=Homo sapiens OX=9606 GN=VPS37B PE=4 SV=1;sp|Q9H9H4|VP37B_HUMAN Vacuolar protein sorting-associated protein 37B OS=Homo sapiens OX=9606 GN=VPS37B PE=1 SV=1;tr|F5H4M0|F5H4M	1.41978	0.497168
2850	Q5SRE5-2;Q5SRE5;Q9BS12;H7C4K7	Nucleoporin NUP188 homolog	NUP188	sp|Q5SRE5-2|NU188_HUMAN Isoform 2 of Nucleoporin NUP188 homolog OS=Homo sapiens OX=9606 GN=NUP188;sp|Q5SRE5|NU188_HUMAN Nucleoporin NUP188 homolog OS=Homo sapiens OX=9606 GN=NUP188 PE=1 SV=1;tr|Q9BS12|Q9BS12_HUMAN NUP188 protein (Fragment) OS=Homo sapiens	0.744801	0.576316
3291	Q9NVV4-2;Q9NVV4;Q5PXD5;Q5HYE0;A0A087WYC0;A0A2Q2TH77;Q08379-2;Q08379	Poly(A) RNA polymerase, mitochondrial	MTPAP	sp|Q9NVV4-2|PAPD1_HUMAN Isoform 2 of Poly(A) RNA polymerase, mitochondrial OS=Homo sapiens OX=9606 GN=MTPAP;sp|Q9NVV4|PAPD1_HUMAN Poly(A) RNA polymerase, mitochondrial OS=Homo sapiens OX=9606 GN=MTPAP PE=1 SV=1	0.779777	0.788534
3412	Q9Y4X5;Q59FM8;A0A087WT96;H3BNB9;H3BSK4	E3 ubiquitin-protein ligase ARIH1	ARIH1	sp|Q9Y4X5|ARI1_HUMAN E3 ubiquitin-protein ligase ARIH1 OS=Homo sapiens OX=9606 GN=ARIH1 PE=1 SV=2;tr|Q59FM8|Q59FM8_HUMAN RBR-type E3 ubiquitin transferase (Fragment) OS=Homo sapiens OX=9606 PE=2 SV=1	2.12228	1.0495
209	B3KXZ9;B2R642;A8K6A6;A0A024R3I5;P43121-2;P43121	Cell surface glycoprotein MUC18	MCAM	tr|B3KXZ9|B3KXZ9_HUMAN cDNA FLJ46477 fis, clone THYMU3025118, highly similar to Cell surface glycoprotein MUC18 OS=Homo sapiens OX=9606 PE=2 SV=1;tr|B2R642|B2R642_HUMAN cDNA, FLJ92775, highly similar to Homo sapiens melanoma cell adhesion molecule (MCAM),	20.821	0.676485
678	A0A0S2Z5I7;A0A087X020;Q9Y3A5;A0A0S2Z5F7;F8WE72	Ribosome maturation protein SBDS	SBDS	tr|A0A0S2Z5I7|A0A0S2Z5I7_HUMAN Shwachman-Bodian-Diamond syndrome isoform 1 (Fragment) OS=Homo sapiens OX=9606 GN=SBDS PE=2 SV=1;tr|A0A087X020|A0A087X020_HUMAN Ribosome maturation protein SBDS OS=Homo sapiens OX=9606 GN=SBDS PE=1 SV=1;sp|Q9Y3A5|SBDS_HUMAN R	0.583704	0.689621
1548	B4DIS6;Q9H6R0;I3L1L6;Q9H6R0-2;Q9NPV4;Q05BE5	Putative ATP-dependent RNA helicase DHX33	DHX33	tr|B4DIS6|B4DIS6_HUMAN cDNA FLJ56443, highly similar to Putative ATP-dependent RNA helicase DHX33 OS=Homo sapiens OX=9606 PE=2 SV=1;sp|Q9H6R0|DHX33_HUMAN ATP-dependent RNA helicase DHX33 OS=Homo sapiens OX=9606 GN=DHX33 PE=1 SV=2;tr|I3L1L6|I3L1L6_HUMAN ATP	20.983	0.767992
1703	I3L0N3;B7Z5J7;P46459;B4DGR3;I3L0L3;I3L338;I3L4Q9	Vesicle-fusing ATPase	NSF	tr|I3L0N3|I3L0N3_HUMAN Vesicle-fusing ATPase OS=Homo sapiens OX=9606 GN=NSF PE=1 SV=1;tr|B7Z5J7|B7Z5J7_HUMAN cDNA FLJ58682, highly similar to Vesicle-fusing ATPase OS=Homo sapiens OX=9606 PE=2 SV=1;sp|P46459|NSF_HUMAN Vesicle-fusing ATPase OS=Homo sapiens	2.77736	0.539572
732	H7C5Z6;A0A0A0MSF4;A0A0A0MSF2;Q96Q07-3;Q96Q07-2;Q96Q07;C9J8E4	BTB/POZ domain-containing protein 9	BTBD9	tr|H7C5Z6|H7C5Z6_HUMAN BTB/POZ domain-containing protein 9 OS=Homo sapiens OX=9606 GN=BTBD9 PE=1 SV=1;tr|A0A0A0MSF4|A0A0A0MSF4_HUMAN BTB/POZ domain-containing protein 9 OS=Homo sapiens OX=9606 GN=BTBD9 PE=1 SV=1;tr|A0A0A0MSF2|A0A0A0MSF2_HUMAN BTB/POZ domai	1.17882	1.05394
3309	Q9NZM1-6;Q9NZM1;Q9NZM1-2;Q9NZM1-3;Q9NZM1-5;H0YD14;Q9NZM1-7;Q9NZM1-8;Q9NZM1-4;B3KSL7;O75923-15;O75923-3;O75923-9;O75923;O75923-14;O75923-6;O75923-12;O75923-5;O75923-11;O75923-4;O75923-10;O75923-2;O75923-8;O75923-7;O75923-13	Myoferlin	MYOF	sp|Q9NZM1-6|MYOF_HUMAN Isoform 6 of Myoferlin OS=Homo sapiens OX=9606 GN=MYOF;sp|Q9NZM1|MYOF_HUMAN Myoferlin OS=Homo sapiens OX=9606 GN=MYOF PE=1 SV=1;sp|Q9NZM1-2|MYOF_HUMAN Isoform 2 of Myoferlin OS=Homo sapiens OX=9606 GN=MYOF;sp|Q9NZM1-3|MYOF_HUMAN Isof	0.178245	0.808475
2323	P12270;Q58F23;Q504U6;P12270-2;A0PJC9;Q5SWX9	Nucleoprotein TPR	TPR	sp|P12270|TPR_HUMAN Nucleoprotein TPR OS=Homo sapiens OX=9606 GN=TPR PE=1 SV=3	1.72814	2.17392
2835	Q5JPH6;H3BTB7;Q5JPH6-2;O14563	Probable glutamate--tRNA ligase, mitochondrial	EARS2;A-735G6.3	sp|Q5JPH6|SYEM_HUMAN Probable glutamate--tRNA ligase, mitochondrial OS=Homo sapiens OX=9606 GN=EARS2 PE=1 SV=2;tr|H3BTB7|H3BTB7_HUMAN Probable glutamate--tRNA ligase, mitochondrial OS=Homo sapiens OX=9606 GN=EARS2 PE=1 SV=1;sp|Q5JPH6-2|SYEM_HUMAN Isoform 2	1.39029	0.360792
1253	Q9UEH5;Q6IPW4;Q6IB76;A8K750;E7EPT4;P19404	NADH dehydrogenase [ubiquinone] flavoprotein 2, mitochondrial	NDUFV2	tr|Q9UEH5|Q9UEH5_HUMAN 24-kDa subunit of complex I (Fragment) OS=Homo sapiens OX=9606 GN=NDUFV2 PE=4 SV=1;tr|Q6IPW4|Q6IPW4_HUMAN NADH dehydrogenase (Ubiquinone) flavoprotein 2, 24kDa OS=Homo sapiens OX=9606 GN=NDUFV2 PE=2 SV=1;tr|Q6IB76|Q6IB76_HUMAN NDUFV2	20.6841	0.60206
2113	Q6PK82;O14617-4;O14617;O14617-5;O14617-2;A0A2R8Y4J3;A0A2R8Y611;O14617-3;A0A087WYN6	AP-3 complex subunit delta-1	AP3D1	tr|Q6PK82|Q6PK82_HUMAN AP3D1 protein (Fragment) OS=Homo sapiens OX=9606 GN=AP3D1 PE=2 SV=1;sp|O14617-4|AP3D1_HUMAN Isoform 4 of AP-3 complex subunit delta-1 OS=Homo sapiens OX=9606 GN=AP3D1;sp|O14617|AP3D1_HUMAN AP-3 complex subunit delta-1 OS=Homo sapiens	1.44104	0.742303
2132	Q53R19;O15144;A0A024R408;Q9BXV5;C9JTV5;G5E9J0;H7C3F9;G5E9S7	Actin-related protein 2/3 complex subunit 2	ARPC2	tr|Q53R19|Q53R19_HUMAN Arp2/3 complex 34 kDa subunit OS=Homo sapiens OX=9606 GN=ARPC2 PE=2 SV=1;sp|O15144|ARPC2_HUMAN Actin-related protein 2/3 complex subunit 2 OS=Homo sapiens OX=9606 GN=ARPC2 PE=1 SV=1	20.8098	0.642205
3320	Q9P0U3-2;Q9P0U3	Sentrin-specific protease 1	SENP1	sp|Q9P0U3-2|SENP1_HUMAN Isoform 2 of Sentrin-specific protease 1 OS=Homo sapiens OX=9606 GN=SENP1;sp|Q9P0U3|SENP1_HUMAN Sentrin-specific protease 1 OS=Homo sapiens OX=9606 GN=SENP1 PE=1 SV=2	1.98915	0.717746
2106	O00401;A8K180;A4D0Y1;Q68DE4	Neural Wiskott-Aldrich syndrome protein	WASL	sp|O00401|WASL_HUMAN Neural Wiskott-Aldrich syndrome protein OS=Homo sapiens OX=9606 GN=WASL PE=1 SV=2;tr|A8K180|A8K180_HUMAN cDNA FLJ76749, highly similar to Homo sapiens Wiskott-Aldrich syndrome-like (WASL), mRNA OS=Homo sapiens OX=9606 PE=2 SV=1;tr|A4D0	0.639088	0.692248
618	A0A075B730;P58107	Epiplakin	EPPK1	tr|A0A075B730|A0A075B730_HUMAN Epiplakin OS=Homo sapiens OX=9606 GN=EPPK1 PE=1 SV=2;sp|P58107|EPIPL_HUMAN Epiplakin OS=Homo sapiens OX=9606 GN=EPPK1 PE=1 SV=3	1.15443	0.436717
1257	B4DQY1;B4DDF7;A8K7B7;P30153;Q8NB89;B4DE69;A8K3H8;B3KQV6;B4E1Q0;C9J9C1;E9PH38;M0QXG4;M0R0K6;H0YDG7;B7Z1G3;A8K8B0;P30154-5;P30154-4;P30154;P30154-3;P30154-2	Serine/threonine-protein phosphatase 2A 65 kDa regulatory subunit A alpha isoform	PPP2R1A	tr|B4DQY1|B4DQY1_HUMAN cDNA FLJ56133, highly similar to Serine/threonine-protein phosphatase 2A 65 kDa regulatory subunit A alpha isoform OS=Homo sapiens OX=9606 PE=2 SV=1;tr|B4DDF7|B4DDF7_HUMAN cDNA FLJ53296, highly similar to Serine/threonine-protein pho	2.34043	2.01568
2703	Q14444-2;Q14444;G3V153;B3KXU8;E9PLA9;B4DSF8	Caprin-1	CAPRIN1	sp|Q14444-2|CAPR1_HUMAN Isoform 2 of Caprin-1 OS=Homo sapiens OX=9606 GN=CAPRIN1;sp|Q14444|CAPR1_HUMAN Caprin-1 OS=Homo sapiens OX=9606 GN=CAPRIN1 PE=1 SV=2;tr|G3V153|G3V153_HUMAN Caprin-1 OS=Homo sapiens OX=9606 GN=CAPRIN1 PE=1 SV=1;tr|B3KXU8|B3KXU8_HUMAN	-8.44181	1.0998
2399	Q59FM5;P29992;K7EL62;A0A087WVZ3;O95837	Guanine nucleotide-binding protein subunit alpha-11	GNA11	tr|Q59FM5|Q59FM5_HUMAN Guanine nucleotide-binding protein G, alpha subunit variant (Fragment) OS=Homo sapiens OX=9606 PE=2 SV=1;sp|P29992|GNA11_HUMAN Guanine nucleotide-binding protein subunit alpha-11 OS=Homo sapiens OX=9606 GN=GNA11 PE=1 SV=2;tr|K7EL62|K	20.7363	0.60206
531	Q8TB01;Q6NWZ1;A0A024RBH2;Q07065;B3KVX6	Cytoskeleton-associated protein 4	CKAP4	tr|Q8TB01|Q8TB01_HUMAN Similar to cytoskeleton-associated protein 4 (Fragment) OS=Homo sapiens OX=9606 PE=2 SV=1;tr|Q6NWZ1|Q6NWZ1_HUMAN CKAP4 protein (Fragment) OS=Homo sapiens OX=9606 GN=CKAP4 PE=2 SV=1;tr|A0A024RBH2|A0A024RBH2_HUMAN Cytoskeleton-associat	1.07175	0.736224
3242	Q9H6X2-5;Q9H6X2;Q53FL1;Q508I8;Q508I6;Q508I5;Q508I7;Q9H6X2-3;Q9H6X2-4;Q9H6X2-6;Q9H6X2-2;D6W5F9;H0YC24	Anthrax toxin receptor 1	ANTXR1;ANTXR1/NNG1 fusion	sp|Q9H6X2-5|ANTR1_HUMAN Isoform 5 of Anthrax toxin receptor 1 OS=Homo sapiens OX=9606 GN=ANTXR1;sp|Q9H6X2|ANTR1_HUMAN Anthrax toxin receptor 1 OS=Homo sapiens OX=9606 GN=ANTXR1 PE=1 SV=2;tr|Q53FL1|Q53FL1_HUMAN Tumor endothelial marker 8 isoform 3 variant (	0.722732	1.09998
35	B4DL04;A0A024QZA8;P29317;Q96HF4;B4DVT5;J3KR66;B4DQP7;B4DSE0;Q96L35;B1AKC9;D3DNT9;Q59F17;Q541P7;Q4LE53;A0A0B4J1T8;P54762-5;P54762;P29323-2;P54760;P29323-3;Q15375-2;Q15375-4;Q15375;P54753;Q9UF33;P29323;Q9P0M0;Q9P0L3;Q9P0L7;Q9P0L6;Q9P0L5;Q9NPI2;Q3MS92;Q3MS96;Q5JY90;U3NG26;Q53TA0;C9JXA2;Q58F15;E9PG71;Q6P4R6;A8K5U6;A0A140VJJ0;A0A024R452;Q06187;Q06187-2;P54764-2;P54756-3;P29320;P54764;P29322	Receptor protein-tyrosine kinase;Ephrin type-A receptor 2	EPHA2	tr|B4DL04|B4DL04_HUMAN cDNA FLJ51229, highly similar to Ephrin type-A receptor 2 OS=Homo sapiens OX=9606 PE=2 SV=1;tr|A0A024QZA8|A0A024QZA8_HUMAN EPH receptor A2, isoform CRA_a OS=Homo sapiens OX=9606 GN=EPHA2 PE=3 SV=1;sp|P29317|EPHA2_HUMAN Ephrin type-A	21.0499	0.753024
2541	P61962;B4DH46;A0A087WWI6;P61962-2	DDB1- and CUL4-associated factor 7	DCAF7	sp|P61962|DCAF7_HUMAN DDB1- and CUL4-associated factor 7 OS=Homo sapiens OX=9606 GN=DCAF7 PE=1 SV=1;tr|B4DH46|B4DH46_HUMAN cDNA FLJ60519, highly similar to WD repeat protein 68 OS=Homo sapiens OX=9606 PE=2 SV=1	-2.06588	0.724522
2498	P52895;Q59GU2;B4DK69;Q04828;H0Y804;S4R3P0;B4E0M1;A6NHU4;P52895-2	Aldo-keto reductase family 1 member C2;Aldo-keto reductase family 1 member C1	AKR1C2;AKR1C1	sp|P52895|AK1C2_HUMAN Aldo-keto reductase family 1 member C2 OS=Homo sapiens OX=9606 GN=AKR1C2 PE=1 SV=3;tr|Q59GU2|Q59GU2_HUMAN Aldo-keto reductase family 1, member C2 variant (Fragment) OS=Homo sapiens OX=9606 PE=2 SV=1;tr|B4DK69|B4DK69_HUMAN Aldo-keto re	0.881669	0.395525
1070	A0A2X0SFC2;Q8N4T4-2;Q8N4T4-4;Q8N4T4;B4E0T1;Q8N4T4-3	Rho guanine nucleotide exchange factor 39	ARHGEF39	tr|A0A2X0SFC2|A0A2X0SFC2_HUMAN ARHGEF39 (Fragment) OS=Homo sapiens OX=9606 GN=ARHGEF39 PE=4 SV=1;sp|Q8N4T4-2|ARG39_HUMAN Isoform 2 of Rho guanine nucleotide exchange factor 39 OS=Homo sapiens OX=9606 GN=ARHGEF39;sp|Q8N4T4-4|ARG39_HUMAN Isoform 4 of Rho gua	20.7462	0.60206
343	C9JKI3;A0A024R757;Q03135-2;Q7Z4F3	Caveolin;Caveolin-1	CAV1	tr|C9JKI3|C9JKI3_HUMAN Caveolin (Fragment) OS=Homo sapiens OX=9606 GN=CAV1 PE=1 SV=1;tr|A0A024R757|A0A024R757_HUMAN Caveolin OS=Homo sapiens OX=9606 GN=CAV1 PE=3 SV=1;sp|Q03135-2|CAV1_HUMAN Isoform 2 of Caveolin-1 OS=Homo sapiens OX=9606 GN=CAV1;tr|Q7Z4F3|	20.75	0.60206
2630	Q07820;B4E3L8;B4DG83;Q07820-2;B4DU51;C8YZ26;A0A087WT64;B4DLY8	Induced myeloid leukemia cell differentiation protein Mcl-1	MCL1	sp|Q07820|MCL1_HUMAN Induced myeloid leukemia cell differentiation protein Mcl-1 OS=Homo sapiens OX=9606 GN=MCL1 PE=1 SV=3;tr|B4E3L8|B4E3L8_HUMAN cDNA FLJ50385, highly similar to Induced myeloid leukemia cell differentiation protein Mcl-1 OS=Homo sapiens O	21.2281	0.876565
1345	B2R5U7;Q03701;C9J9W7	CCAAT/enhancer-binding protein zeta	CEBPZ	tr|B2R5U7|B2R5U7_HUMAN cDNA, FLJ92633, highly similar to Homo sapiens CCAAT-box-binding transcription factor (CBF2), mRNA OS=Homo sapiens OX=9606 PE=2 SV=1;sp|Q03701|CEBPZ_HUMAN CCAAT/enhancer-binding protein zeta OS=Homo sapiens OX=9606 GN=CEBPZ PE=1 SV=3	21.2038	0.824178
2259	Q5U091;P01111;X5D945;P01112	GTPase NRas;GTPase HRas;GTPase HRas, N-terminally processed	NRAS;HRAS	tr|Q5U091|Q5U091_HUMAN Neuroblastoma RAS viral (V-ras) oncogene homolog OS=Homo sapiens OX=9606 GN=NRAS PE=2 SV=1;sp|P01111|RASN_HUMAN GTPase NRas OS=Homo sapiens OX=9606 GN=NRAS PE=1 SV=1;tr|X5D945|X5D945_HUMAN Harvey rat sarcoma viral oncoprotein isoform	0.852042	0.60206
3380	Q9Y225;Q9Y225-2	RING finger protein 24	RNF24	sp|Q9Y225|RNF24_HUMAN RING finger protein 24 OS=Homo sapiens OX=9606 GN=RNF24 PE=1 SV=1;sp|Q9Y225-2|RNF24_HUMAN Isoform 2 of RING finger protein 24 OS=Homo sapiens OX=9606 GN=RNF24	21.8033	2.03135
2598	P82675;B4DIW8;P82675-2	28S ribosomal protein S5, mitochondrial	MRPS5	sp|P82675|RT05_HUMAN 28S ribosomal protein S5, mitochondrial OS=Homo sapiens OX=9606 GN=MRPS5 PE=1 SV=2	2.6527	0.807586
3078	Q8TEX9;Q8TEX9-2;B3KQ33;Q59FI4;H0YN14;D3DS63;B3KTB3;B3KT38;B3KPS9;B3KPY9;Q6I9Y8;B3KSQ4;Q59H62;B4DXR7;H0YMR4;H0YN07;H0YLV0;H0YL92;H0YK93;H0YKG5	Importin-4	IPO4	sp|Q8TEX9|IPO4_HUMAN Importin-4 OS=Homo sapiens OX=9606 GN=IPO4 PE=1 SV=2;sp|Q8TEX9-2|IPO4_HUMAN Isoform 2 of Importin-4 OS=Homo sapiens OX=9606 GN=IPO4;tr|B3KQ33|B3KQ33_HUMAN cDNA FLJ32715 fis, clone TESTI2000784, highly similar to Importin-4 OS=Homo sapi	-0.879359	1.46242
3083	Q8WUM4;Q4W4Y1;Q8WUM4-2;B7Z5C1;B4DHD2;Q8WUM4-3;C9IZF9;F8WEQ7;F8WBR8;F8WDK9	Programmed cell death 6-interacting protein	PDCD6IP;DRIP4	sp|Q8WUM4|PDC6I_HUMAN Programmed cell death 6-interacting protein OS=Homo sapiens OX=9606 GN=PDCD6IP PE=1 SV=1;tr|Q4W4Y1|Q4W4Y1_HUMAN Dopamine receptor interacting protein 4 OS=Homo sapiens OX=9606 GN=DRIP4 PE=2 SV=1;sp|Q8WUM4-2|PDC6I_HUMAN Isoform 2 of Pr	0.258373	0.422732
3332	Q9UBD5;Q9UBD5-2;B4E014;Q9UBD5-3;B7Z8A5;B7ZAI3;Q6IBJ0;B4DZ51;U3KQL3	Origin recognition complex subunit 3	ORC3;ORC3L	sp|Q9UBD5|ORC3_HUMAN Origin recognition complex subunit 3 OS=Homo sapiens OX=9606 GN=ORC3 PE=1 SV=1;sp|Q9UBD5-2|ORC3_HUMAN Isoform 2 of Origin recognition complex subunit 3 OS=Homo sapiens OX=9606 GN=ORC3;tr|B4E014|B4E014_HUMAN cDNA FLJ54334, highly simila	2.08396	0.695317
305	A0A024R5X7;O76031;Q9H072;H0YM48;H0YK07	ATP-dependent Clp protease ATP-binding subunit clpX-like, mitochondrial	CLPX;DKFZp586J151	tr|A0A024R5X7|A0A024R5X7_HUMAN ClpX caseinolytic peptidase X homolog (E. coli), isoform CRA_a OS=Homo sapiens OX=9606 GN=CLPX PE=4 SV=1;sp|O76031|CLPX_HUMAN ATP-dependent Clp protease ATP-binding subunit clpX-like, mitochondrial OS=Homo sapiens OX=9606 GN=	-0.739908	1.49995
738	A0A2R8YGG3;A0A2R8Y7S2;A7E2E1;A0A2R8Y4P4;Q9HBD4;B9EGQ8;A0A0A0MT49;P51532-5;P51532-2;P51532-3;P51532-4;P51532;B4E0F1;B4DSI8;A0A2R8Y6V2;A0A2R8YF58;A0A2R8Y526;A0A2R8Y7Y7;A0A2R8YF80;A0A2R8Y6N0;A0A2R8Y7F3;A0A2R8Y440;A0A2R8YG32;A0A2R8YDA1;A0A2R8Y4C5;Q59FZ6;A0A2R8YGP5;B3KNW7;A0A2R8Y523;A0A2R8YFV8;A0A2R8YCY3;B4DSC8;A0A2R8Y4R6;A0A0U1RQE1;A0A2R8YFK5;K7EQF0;A0A2R8Y5K3;K7EP28;A0A0U1RRG6;A0A0U1RRF5;A0A0U1RRD6;…	Transcription activator BRG1	SMARCA4	tr|A0A2R8YGG3|A0A2R8YGG3_HUMAN Transcription activator BRG1 (Fragment) OS=Homo sapiens OX=9606 GN=SMARCA4 PE=1 SV=1;tr|A0A2R8Y7S2|A0A2R8Y7S2_HUMAN Transcription activator BRG1 OS=Homo sapiens OX=9606 GN=SMARCA4 PE=1 SV=1;tr|A7E2E1|A7E2E1_HUMAN SWI/SNF rela	-1.25736	1.39139
256	A0A024R4F4;M0R2B7;P28340;Q308M6;M0QZR8;Q59FA0;A0A2R8Y7K6;A0A2R8Y705;M0QXE6;M0QXQ2;M0QZB4;M0R3H8	DNA polymerase;DNA polymerase delta catalytic subunit	POLD1	tr|A0A024R4F4|A0A024R4F4_HUMAN DNA polymerase OS=Homo sapiens OX=9606 GN=POLD1 PE=3 SV=1;tr|M0R2B7|M0R2B7_HUMAN DNA polymerase OS=Homo sapiens OX=9606 GN=POLD1 PE=1 SV=1;sp|P28340|DPOD1_HUMAN DNA polymerase delta catalytic subunit OS=Homo sapiens OX=9606 G	-0.183357	0.40312
3124	Q96B67	Arrestin domain-containing protein 3	ARRDC3	sp|Q96B67|ARRD3_HUMAN Arrestin domain-containing protein 3 OS=Homo sapiens OX=9606 GN=ARRDC3 PE=1 SV=1	2.31189	1.15508
327	A0A024R6S1;O60884;T2DN57;T2DPK5;A0A087WT48	DnaJ homolog subfamily A member 2	DNAJA2	tr|A0A024R6S1|A0A024R6S1_HUMAN DnaJ (Hsp40) homolog, subfamily A, member 2, isoform CRA_a OS=Homo sapiens OX=9606 GN=DNAJA2 PE=3 SV=1;sp|O60884|DNJA2_HUMAN DnaJ homolog subfamily A member 2 OS=Homo sapiens OX=9606 GN=DNAJA2 PE=1 SV=1	-0.575534	0.396642
800	A0A0F7L0Q8;B4DXZ6;A0A0F7L1S3;A0A0F7KYT8;P51114-2;P51114;E7EU85;B4DGH9;E9PFF5;B4DM21;P51114-3;B4DM78;C9JZE0;C9JY20;C9JAJ4;H7C4S4;C9IZ22	Fragile X mental retardation syndrome-related protein 1	FXR1	tr|A0A0F7L0Q8|A0A0F7L0Q8_HUMAN Fragile X mental retardation autosomal homolog variant p5FK OS=Homo sapiens OX=9606 GN=FXR1 PE=2 SV=1;tr|B4DXZ6|B4DXZ6_HUMAN cDNA FLJ58644, highly similar to Fragile X mental retardation syndrome-related protein 1 OS=Homo sap	-0.367036	0.951608
164	B7Z2R3;A0A024R225;A0A024R233;A0A1B0GTW1;A0A2R8YDH4;Q9UDY2-5;Q9UDY2-4;Q9UDY2-2;Q9UDY2-6;Q9UDY2-3;Q9UDY2;Q9UDY2-7;B7Z954;U3KQJ2;B1AN86	Tight junction protein ZO-2	TJP2	tr|B7Z2R3|B7Z2R3_HUMAN cDNA FLJ59510, highly similar to Homo sapiens tight junction protein 2 (TJP2), transcript variant 2, mRNA OS=Homo sapiens OX=9606 PE=2 SV=1;tr|A0A024R225|A0A024R225_HUMAN Tight junction protein 2 (Zona occludens 2), isoform CRA_c OS=	-0.300144	0.564437
205	A0A024R3C3;A0A024R394;Q9UHD1-2;Q9UHD1;E9PHZ2;E9PPQ5;E9PIZ4;Q9NZ93;E9PSD5;E9PL00	Cysteine and histidine-rich domain-containing protein 1	CHORDC1	tr|A0A024R3C3|A0A024R3C3_HUMAN Cysteine and histidine-rich domain (CHORD)-containing 1, isoform CRA_b OS=Homo sapiens OX=9606 GN=CHORDC1 PE=4 SV=1;tr|A0A024R394|A0A024R394_HUMAN Cysteine and histidine-rich domain (CHORD)-containing 1, isoform CRA_c OS=Homo	21.8033	1.5791
3061	Q8TAD4;Q9H9X0;Q9BTR6;Q9BY48;D6REM2;H0Y957;F6MF26;Q8TAD4-4;Q8TAD4-3;Q8TAD4-2	Zinc transporter 5	SLC30A5	sp|Q8TAD4|ZNT5_HUMAN Zinc transporter 5 OS=Homo sapiens OX=9606 GN=SLC30A5 PE=1 SV=1;tr|Q9H9X0|Q9H9X0_HUMAN cDNA FLJ12496 fis, clone NT2RM2001659, weakly similar to ZINC/CADMIUM RESISTANCE PROTEIN OS=Homo sapiens OX=9606 PE=2 SV=1;tr|Q9BTR6|Q9BTR6_HUMAN Un	0.167586	0.486774
416	A0A024R8M4;Q14558;Q14558-2;B4DP31;C9J168;C9JUN4;C9JKT9;C9JNQ3	Phosphoribosyl pyrophosphate synthase-associated protein 1	PRPSAP1	tr|A0A024R8M4|A0A024R8M4_HUMAN Phosphoribosyl pyrophosphate synthetase-associated protein 1, isoform CRA_a OS=Homo sapiens OX=9606 GN=PRPSAP1 PE=4 SV=1;sp|Q14558|KPRA_HUMAN Phosphoribosyl pyrophosphate synthase-associated protein 1 OS=Homo sapiens OX=9606	1.46527	0.977135
154	A0A024R1U4;P51148;P51148-2;K7ERI8;K7ERQ8;F8VVZ0;F8VUA5;F8VVK3;K7ENY4;P61020-2;F8VWU4;K7EIP6;F8WCY6;F8WD79;F8VPW9;F8VSF8;F8VWZ7	Ras-related protein Rab-5C	RAB5C	tr|A0A024R1U4|A0A024R1U4_HUMAN RAB5C, member RAS oncogene family, isoform CRA_a OS=Homo sapiens OX=9606 GN=RAB5C PE=4 SV=1;sp|P51148|RAB5C_HUMAN Ras-related protein Rab-5C OS=Homo sapiens OX=9606 GN=RAB5C PE=1 SV=2;sp|P51148-2|RAB5C_HUMAN Isoform 2 of Ras-	0.53613	0.306853
3218	Q9H0A0;A0A087WV29;Q9H0A0-2;Q05CW7;E9PMU0;E9PJN6	N-acetyltransferase 10	NAT10	sp|Q9H0A0|NAT10_HUMAN RNA cytidine acetyltransferase OS=Homo sapiens OX=9606 GN=NAT10 PE=1 SV=2;tr|A0A087WV29|A0A087WV29_HUMAN RNA cytidine acetyltransferase OS=Homo sapiens OX=9606 GN=NAT10 PE=1 SV=1;sp|Q9H0A0-2|NAT10_HUMAN Isoform 2 of RNA cytidine acety	1.07177	0.703253
1684	B5MCR8;Q6NXT4-4;Q6NXT4-3;Q6NXT4;Q6NXT4-2;C9JZR9;Q9NWI4;B3KU87;Q7Z4D6	Zinc transporter 6	SLC30A6	tr|B5MCR8|B5MCR8_HUMAN Solute carrier family 30 (Zinc transporter), member 6, isoform CRA_b OS=Homo sapiens OX=9606 GN=SLC30A6 PE=1 SV=1;sp|Q6NXT4-4|ZNT6_HUMAN Isoform 4 of Zinc transporter 6 OS=Homo sapiens OX=9606 GN=SLC30A6;sp|Q6NXT4-3|ZNT6_HUMAN Isofor	20.8431	0.410757
151	A0A024R1Y2;A0A024R1T9;Q4LE36;P53396-2;P53396;P53396-3;Q8N9C4;K7ESG8	ATP-citrate synthase	ACLY;ACLY variant protein	tr|A0A024R1Y2|A0A024R1Y2_HUMAN ATP-citrate synthase OS=Homo sapiens OX=9606 GN=ACLY PE=3 SV=1;tr|A0A024R1T9|A0A024R1T9_HUMAN ATP-citrate synthase OS=Homo sapiens OX=9606 GN=ACLY PE=3 SV=1;tr|Q4LE36|Q4LE36_HUMAN ACLY variant protein (Fragment) OS=Homo sapie	0.837335	0.686523
2892	Q9NVF8;Q6FIC5;Q9Y696;B4DWC4;B3KTR3	Chloride intracellular channel protein;Chloride intracellular channel protein 4	CLIC4	tr|Q9NVF8|Q9NVF8_HUMAN cDNA FLJ10762 fis, clone NT2RP4000008, moderately similar to CHLORINE CHANNEL PROTEIN P64 OS=Homo sapiens OX=9606 PE=2 SV=1;tr|Q6FIC5|Q6FIC5_HUMAN Chloride intracellular channel protein OS=Homo sapiens OX=9606 GN=CLIC4 PE=2 SV=1;sp|Q	21.7451	1.06919
153	A0A024R1U2;Q7RTV0	PHD finger-like domain-containing protein 5A	PHF5A	tr|A0A024R1U2|A0A024R1U2_HUMAN PHD finger protein 5A, isoform CRA_a OS=Homo sapiens OX=9606 GN=PHF5A PE=4 SV=1;sp|Q7RTV0|PHF5A_HUMAN PHD finger-like domain-containing protein 5A OS=Homo sapiens OX=9606 GN=PHF5A PE=1 SV=1	-2.17407	0.783266
2222	O95070;A6NGW1;A8K509;E9PIZ0;C9JST7;E9PS11;O00606;E9PP02	Protein YIF1A	YIF1A	sp|O95070|YIF1A_HUMAN Protein YIF1A OS=Homo sapiens OX=9606 GN=YIF1A PE=1 SV=2;tr|A6NGW1|A6NGW1_HUMAN Protein YIF1A OS=Homo sapiens OX=9606 GN=YIF1A PE=1 SV=1;tr|A8K509|A8K509_HUMAN cDNA FLJ75931, highly similar to Homo sapiens Yip1 interacting factor homo	-2.20292	0.496424
316	A0A024R694;P12814-2;P12814;P12814-3;P12814-4;H9KV75;B7Z565;Q86TX4;B4DFY0;G3V2N5;B4DRP5;B3KUX9;G3V2W4;H7C5W8;B7Z2W3;P35609-2;P35609;B7Z2N5;B2R8Y4;Q08043;G3V2X9;H0YJ11;H0YJW3;A1L0V1;Q5ZEZ4;B7Z4V1;B7Z4P6;Q59FD9;B7Z4K1;F6THM6;B4DZQ2;A0A087WSZ2;G3V5M4;G3V2E8;G3V380;D6RH00;B3W6H3;B7Z4P8;Q4VAM3	Alpha-actinin-1	ACTN1	tr|A0A024R694|A0A024R694_HUMAN Actinin, alpha 1, isoform CRA_a OS=Homo sapiens OX=9606 GN=ACTN1 PE=4 SV=1;sp|P12814-2|ACTN1_HUMAN Isoform 2 of Alpha-actinin-1 OS=Homo sapiens OX=9606 GN=ACTN1;sp|P12814|ACTN1_HUMAN Alpha-actinin-1 OS=Homo sapiens OX=9606 GN	21.0803	0.705649
2164	O43854-2;O43854;B7Z865	EGF-like repeat and discoidin I-like domain-containing protein 3	EDIL3	sp|O43854-2|EDIL3_HUMAN Isoform 2 of EGF-like repeat and discoidin I-like domain-containing protein 3 OS=Homo sapiens OX=9606 GN=EDIL3;sp|O43854|EDIL3_HUMAN EGF-like repeat and discoidin I-like domain-containing protein 3 OS=Homo sapiens OX=9606 GN=EDIL3 P	1.74038	0.709394
2293	P08579;Q86YK2;B5BTZ8	U2 small nuclear ribonucleoprotein B	SNRPB2	sp|P08579|RU2B_HUMAN U2 small nuclear ribonucleoprotein B OS=Homo sapiens OX=9606 GN=SNRPB2 PE=1 SV=1;tr|Q86YK2|Q86YK2_HUMAN Similar to small nuclear ribonucleoprotein polypeptide B (Fragment) OS=Homo sapiens OX=9606 PE=2 SV=1;tr|B5BTZ8|B5BTZ8_HUMAN Sm	2.20507	0.60206
864	A0A0S2Z565;A0A0S2Z591;O00165-5;O00165;O00165-2;O00165-3;O00165-4;A0A0S2Z519;E9PIQ7;Q5VYD6;O00165-6	HCLS1-associated protein X-1	HAX1	tr|A0A0S2Z565|A0A0S2Z565_HUMAN HCLS1 associated protein X-1 isoform 3 (Fragment) OS=Homo sapiens OX=9606 GN=HAX1 PE=2 SV=1;tr|A0A0S2Z591|A0A0S2Z591_HUMAN HCLS1 associated protein X-1 isoform 1 (Fragment) OS=Homo sapiens OX=9606 GN=HAX1 PE=2 SV=1;sp|O00165-	0.813493	1.00699
80	A0A024R071;O75694;B4DLT2;O75694-2;E9PF10;B3KMK3;D6RA13	Nuclear pore complex protein Nup155	NUP155	tr|A0A024R071|A0A024R071_HUMAN Nucleoporin 155kDa, isoform CRA_a OS=Homo sapiens OX=9606 GN=NUP155 PE=4 SV=1;sp|O75694|NU155_HUMAN Nuclear pore complex protein Nup155 OS=Homo sapiens OX=9606 GN=NUP155 PE=1 SV=1;tr|B4DLT2|B4DLT2_HUMAN cDNA FLJ56637, highly	0.367719	0.344803
1757	C9J7K9;O15162-2;O15162;H7C5I5;C9J9P4;C9J0H3;C9JE06	Phospholipid scramblase 1	PLSCR1	tr|C9J7K9|C9J7K9_HUMAN Phospholipid scramblase OS=Homo sapiens OX=9606 GN=PLSCR1 PE=1 SV=1;sp|O15162-2|PLS1_HUMAN Isoform 2 of Phospholipid scramblase 1 OS=Homo sapiens OX=9606 GN=PLSCR1;sp|O15162|PLS1_HUMAN Phospholipid scramblase 1 OS=Homo sapiens OX=960	0.246789	0.790528
574	A8YXX5;Q9Y374;A4FVA6;A0A024RD08;A0A024RCX4;Q9NZJ7-2;Q9NZJ7;H0Y8C3;Q8IW90;Q9NZJ7-3;B4E0C5;H7C196	Mitochondrial carrier homolog 1	PIG60;MTCH1	tr|A8YXX5|A8YXX5_HUMAN Cell proliferation-inducing protein 60 OS=Homo sapiens OX=9606 GN=PIG60 PE=2 SV=1;tr|Q9Y374|Q9Y374_HUMAN CGI-64 protein OS=Homo sapiens OX=9606 PE=2 SV=1;tr|A4FVA6|A4FVA6_HUMAN MTCH1 protein (Fragment) OS=Homo sapiens OX=9606 GN=MTCH	20.8877	0.60206
1444	B3KN15;Q7LGA3;Q7LGA3-2;Q7LGA3-3;K7EP71	Heparan sulfate 2-O-sulfotransferase 1	HS2ST1	tr|B3KN15|B3KN15_HUMAN cDNA FLJ13198 fis, clone NT2RP3004454, highly similar to Heparan sulfate 2-O-sulfotransferase 1 OS=Homo sapiens OX=9606 PE=2 SV=1;sp|Q7LGA3|HS2ST_HUMAN Heparan sulfate 2-O-sulfotransferase 1 OS=Homo sapiens OX=9606 GN=HS2ST1 PE=1 SV=	-0.29376	0.607612
2745	Q15654;F2ZC06;Q71V88;Q68D94;H7BZE2;F2ZC09;Q15654-3;Q15654-2	Thyroid receptor-interacting protein 6	TRIP6;TRIP6i1;DKFZp686J22257	sp|Q15654|TRIP6_HUMAN Thyroid receptor-interacting protein 6 OS=Homo sapiens OX=9606 GN=TRIP6 PE=1 SV=3;tr|F2ZC06|F2ZC06_HUMAN Thyroid hormone receptor interacting protein 6 isoform 1 OS=Homo sapiens OX=9606 GN=TRIP6i1 PE=2 SV=1;tr|Q71V88|Q71V88_HUMAN Opa-	-1.62612	2.09043
3351	Q9UIG0-2;Q9UIG0	Tyrosine-protein kinase BAZ1B	BAZ1B	sp|Q9UIG0-2|BAZ1B_HUMAN Isoform 2 of Tyrosine-protein kinase BAZ1B OS=Homo sapiens OX=9606 GN=BAZ1B;sp|Q9UIG0|BAZ1B_HUMAN Tyrosine-protein kinase BAZ1B OS=Homo sapiens OX=9606 GN=BAZ1B PE=1 SV=2	22.2678	1.15269
1483	K7EJE8;K7EKE6;B3KU28;B3KXS5;E5KMI6;P36776-2;P36776;Q2VPA0;P36776-3;B4DPX0;A4VCH6;K7ER27;K7EQF8;K7ER56;K7ERR6	Lon protease homolog, mitochondrial;Lon protease homolog	LONP1	tr|K7EJE8|K7EJE8_HUMAN Lon protease homolog, mitochondrial OS=Homo sapiens OX=9606 GN=LONP1 PE=1 SV=1;tr|K7EKE6|K7EKE6_HUMAN Lon protease homolog, mitochondrial OS=Homo sapiens OX=9606 GN=LONP1 PE=1 SV=1;tr|B3KU28|B3KU28_HUMAN Lon protease homolog, mitocho	0.517896	0.738649
1755	C9J647;F8WF03;F2Z2I0;F2Z2W5;B4DEV6		SMPD4	tr|C9J647|C9J647_HUMAN Sphingomyelin phosphodiesterase 4 (Fragment) OS=Homo sapiens OX=9606 GN=SMPD4 PE=1 SV=1;tr|F8WF03|F8WF03_HUMAN Sphingomyelin phosphodiesterase 4 OS=Homo sapiens OX=9606 GN=SMPD4 PE=1 SV=1;tr|F2Z2I0|F2Z2I0_HUMAN Sphingomyelin phosphod	0.213485	0.426138
1530	B4DGK8;Q8WUK0-2;Q8WUK0;E9PQM0;Q8WUK0-3	Phosphatidylglycerophosphatase and protein-tyrosine phosphatase 1	PTPMT1	tr|B4DGK8|B4DGK8_HUMAN cDNA FLJ57723, moderately similar to Protein-tyrosine phosphatase mitochondrial 1, mitochondrial OS=Homo sapiens OX=9606 PE=2 SV=1;sp|Q8WUK0-2|PTPM1_HUMAN Isoform 2 of Phosphatidylglycerophosphatase and protein-tyrosine phosphatase 1	1.15594	0.786173
2302	P09496-2;F8WF69;P09496-5;P09496-4;P09496-3;P09496;C9J8P9	Clathrin light chain A	CLTA	sp|P09496-2|CLCA_HUMAN Isoform Non-brain of Clathrin light chain A OS=Homo sapiens OX=9606 GN=CLTA;tr|F8WF69|F8WF69_HUMAN Clathrin light chain OS=Homo sapiens OX=9606 GN=CLTA PE=1 SV=1;sp|P09496-5|CLCA_HUMAN Isoform 5 of Clathrin light chain A OS=Homo sapi	21.9711	1.90127
1969	H0Y5U7;Q96T58;F6WRY4	Msx2-interacting protein	SPEN	tr|H0Y5U7|H0Y5U7_HUMAN Msx2-interacting protein (Fragment) OS=Homo sapiens OX=9606 GN=SPEN PE=1 SV=1;sp|Q96T58|MINT_HUMAN Msx2-interacting protein OS=Homo sapiens OX=9606 GN=SPEN PE=1 SV=1;tr|F6WRY4|F6WRY4_HUMAN Msx2-interacting protein (Fragment) OS=Homo	21.7732	1.4818
2875	Q5VT66;Q5VT66-2;H7BYZ9;Q5VT66-3;F6V6Z1;H0YDX4;X6RIL1	Mitochondrial amidoxime-reducing component 1	MARC1	sp|Q5VT66|MARC1_HUMAN Mitochondrial amidoxime-reducing component 1 OS=Homo sapiens OX=9606 GN=MARC1 PE=1 SV=1;sp|Q5VT66-2|MARC1_HUMAN Isoform 2 of Mitochondrial amidoxime-reducing component 1 OS=Homo sapiens OX=9606 GN=MARC1;tr|H7BYZ9|H7BYZ9_HUMAN Mitochon	0.288892	0.619961
3001	Q8IWB1;X6RK76;REV__I3NI21;REV__I3L288;REV__Q96B96;REV__A0A024R386;REV__I3NI23;REV__Q96B96-2	Inositol 1,4,5-trisphosphate receptor-interacting protein	ITPRIP	sp|Q8IWB1|IPRI_HUMAN Inositol 1,4,5-trisphosphate receptor-interacting protein OS=Homo sapiens OX=9606 GN=ITPRIP PE=1 SV=1	1.72537	0.793257
1851	E5KRK5;P28331-4;P28331-5;P28331;P28331-2;B4DJ81;A0A291FIZ5;P28331-3;Q9P1A0;C9JPQ5	NADH-ubiquinone oxidoreductase 75 kDa subunit, mitochondrial	NDUFS1	tr|E5KRK5|E5KRK5_HUMAN Mitochondrial NADH-ubiquinone oxidoreductase 75 kDa subunit OS=Homo sapiens OX=9606 GN=NDUFS1 PE=3 SV=1;sp|P28331-4|NDUS1_HUMAN Isoform 4 of NADH-ubiquinone oxidoreductase 75 kDa subunit, mitochondrial OS=Homo sapiens OX=9606 GN=NDUF	0.213009	1.4373
550	A0A024RBX9;P08559-3;P08559;P08559-2;P08559-4;A5YPB6;Q53GE3;Q5JPU3;Q6LCA3;P29803;Q9UNV7;Q99725;Q99724;P78557;Q5JPU2;Q5JPU0;Q5JPT9;Q5JPU1	Pyruvate dehydrogenase E1 component subunit alpha;Pyruvate dehydrogenase E1 component subunit alpha, somatic form, mitochondrial	PDHA1	tr|A0A024RBX9|A0A024RBX9_HUMAN Pyruvate dehydrogenase E1 component subunit alpha OS=Homo sapiens OX=9606 GN=PDHA1 PE=4 SV=1;sp|P08559-3|ODPA_HUMAN Isoform 3 of Pyruvate dehydrogenase E1 component subunit alpha, somatic form, mitochondrial OS=Homo sapiens O	1.89989	0.996257
63	A0A024QZT7;P33947;P33947-2;H7BYF7	ER lumen protein-retaining receptor;ER lumen protein-retaining receptor 2	KDELR2	tr|A0A024QZT7|A0A024QZT7_HUMAN ER lumen protein-retaining receptor OS=Homo sapiens OX=9606 GN=KDELR2 PE=3 SV=1;sp|P33947|ERD22_HUMAN ER lumen protein-retaining receptor 2 OS=Homo sapiens OX=9606 GN=KDELR2 PE=1 SV=1;sp|P33947-2|ERD22_HUMAN Isoform 2 of ER l	0.190789	0.562784
407	A0A024R8H5;Q12933-4;Q12933-3;Q12933;Q12933-2;B4DGI3;E5KBQ3;B1AMX7;B1AMX8;B1AMY1	TNF receptor-associated factor 2	TRAF2	tr|A0A024R8H5|A0A024R8H5_HUMAN TNF receptor-associated factor 2, isoform CRA_a OS=Homo sapiens OX=9606 GN=TRAF2 PE=4 SV=1;sp|Q12933-4|TRAF2_HUMAN Isoform 4 of TNF receptor-associated factor 2 OS=Homo sapiens OX=9606 GN=TRAF2;sp|Q12933-3|TRAF2_HUMAN Isoform	-2.13464	2.02604
2710	Q14684;Q14684-2;Q6PJM8	Ribosomal RNA processing protein 1 homolog B	RRP1B	sp|Q14684|RRP1B_HUMAN Ribosomal RNA processing protein 1 homolog B OS=Homo sapiens OX=9606 GN=RRP1B PE=1 SV=3;sp|Q14684-2|RRP1B_HUMAN Isoform 2 of Ribosomal RNA processing protein 1 homolog B OS=Homo sapiens OX=9606 GN=RRP1B;tr|Q6PJM8|Q6PJM8_HUMAN RRP1B pr	0.0410961	0.351642
910	Q8IY97;A0A140VJE7;B3KXW5;O43747;O43747-2;B4DDL1;B4DS96;H3BR36;H3BUN9;H3BNR4;H3BNN2;H3BRM7;H3BN71;B4DGE1	AP-1 complex subunit gamma-1	AP1G1	tr|Q8IY97|Q8IY97_HUMAN AP-1 complex subunit gamma OS=Homo sapiens OX=9606 GN=AP1G1 PE=2 SV=1;tr|A0A140VJE7|A0A140VJE7_HUMAN AP-1 complex subunit gamma OS=Homo sapiens OX=9606 PE=2 SV=1;tr|B3KXW5|B3KXW5_HUMAN AP-1 complex subunit gamma OS=Homo sapiens OX=96	0.156458	0.339429
1886	E9PJH7;Q9H936;A0A0D9SFE1;E9PS95;A0A0D9SEI9;A0A024RCA6;A0A024R0W0;Q9H1K4;A0A0D9SFA8;K4DIB0;K4DIA2;A0A0D9SG84;E9PI74;E9PQ36;K4DIB6;K4DIB3;K4DIB8;K4DIA8	Mitochondrial glutamate carrier 1;Mitochondrial glutamate carrier 2	SLC25A22;SLC25A18	tr|E9PJH7|E9PJH7_HUMAN Mitochondrial glutamate carrier 1 (Fragment) OS=Homo sapiens OX=9606 GN=SLC25A22 PE=1 SV=5;sp|Q9H936|GHC1_HUMAN Mitochondrial glutamate carrier 1 OS=Homo sapiens OX=9606 GN=SLC25A22 PE=1 SV=1;tr|A0A0D9SFE1|A0A0D9SFE1_HUMAN Mitochondr	1.73706	1.42789
217	B4E0E1;B2R5W3;A0A024R3T8;P09874;Q05D33;Q6PJL0;Q5VX84;Q5VX85;Q96P95	Poly [ADP-ribose] polymerase 1	PARP1	tr|B4E0E1|B4E0E1_HUMAN Poly [ADP-ribose] polymerase OS=Homo sapiens OX=9606 PE=2 SV=1;tr|B2R5W3|B2R5W3_HUMAN Poly [ADP-ribose] polymerase OS=Homo sapiens OX=9606 PE=2 SV=1;tr|A0A024R3T8|A0A024R3T8_HUMAN Poly [ADP-ribose] polymerase OS=Homo sapiens OX=9606	-0.616861	0.708697
3021	Q8N2K0-3;Q8N2K0;Q8N2K0-2;I3L294;Q5T712;I3L440;I3L1V0	Monoacylglycerol lipase ABHD12	ABHD12	sp|Q8N2K0-3|ABD12_HUMAN Isoform 3 of Monoacylglycerol lipase ABHD12 OS=Homo sapiens OX=9606 GN=ABHD12;sp|Q8N2K0|ABD12_HUMAN Monoacylglycerol lipase ABHD12 OS=Homo sapiens OX=9606 GN=ABHD12 PE=1 SV=2;sp|Q8N2K0-2|ABD12_HUMAN Isoform 2 of Monoacylglycerol lip	3.72583	0.730676
2643	Q10570;D3DWL9;B4DEF4;Q9C0J6;A0A087X101;E9PIM1;A0A087WTV4	Cleavage and polyadenylation specificity factor subunit 1	CPSF1	sp|Q10570|CPSF1_HUMAN Cleavage and polyadenylation specificity factor subunit 1 OS=Homo sapiens OX=9606 GN=CPSF1 PE=1 SV=2;tr|D3DWL9|D3DWL9_HUMAN Cleavage and polyadenylation specific factor 1, 160kDa, isoform CRA_a OS=Homo sapiens OX=9606 GN=CPSF1 PE=4 SV	-3.3929	1.86993
1126	A4D1U5;Q53H12;E9PG39;E9PC15;B4E2Z8;B4DR72;A0A0G2JLG5;A0A0G2JLD0;F8WDD1;Q53H12-2	Acylglycerol kinase, mitochondrial	FLJ10842;AGK	tr|A4D1U5|A4D1U5_HUMAN Multiple substrate lipid kinase, isoform CRA_a OS=Homo sapiens OX=9606 GN=FLJ10842 PE=4 SV=1;sp|Q53H12|AGK_HUMAN Acylglycerol kinase, mitochondrial OS=Homo sapiens OX=9606 GN=AGK PE=1 SV=2;tr|E9PG39|E9PG39_HUMAN Acylglycerol kinase,	22.5415	0.980205
976	Q59F96;H0YGW7;Q2L6I2;A0A1U9X609;Q8NE71-2;Q8NE71;A0A0G2JIC2;B4DNU2	ATP-binding cassette sub-family F member 1	ABCF1	tr|Q59F96|Q59F96_HUMAN ATP-binding cassette, sub-family F, member 1 variant (Fragment) OS=Homo sapiens OX=9606 PE=2 SV=1;tr|H0YGW7|H0YGW7_HUMAN ATP-binding cassette sub-family F member 1 (Fragment) OS=Homo sapiens OX=9606 GN=ABCF1 PE=1 SV=1;tr|Q2L6I2|Q2L6I	21.3446	0.781412
2756	Q16531;F5GY55;B7Z2A1;B4DZP5;B4DSA8;Q16531-2;F5H2L3;F5GZY8;F5GYG8;F5GWI0;F5H198;B7Z859	DNA damage-binding protein 1	DDB1	sp|Q16531|DDB1_HUMAN DNA damage-binding protein 1 OS=Homo sapiens OX=9606 GN=DDB1 PE=1 SV=1;tr|F5GY55|F5GY55_HUMAN DNA damage-binding protein 1 OS=Homo sapiens OX=9606 GN=DDB1 PE=1 SV=1;tr|B7Z2A1|B7Z2A1_HUMAN cDNA FLJ56068, highly similar to DNA damage-bin	-0.503721	0.383559
1924	F5H6E2;O00159-3;O00159;B7Z3E5;A1L180;I3L501	Unconventional myosin-Ic	MYO1C	tr|F5H6E2|F5H6E2_HUMAN Unconventional myosin-Ic OS=Homo sapiens OX=9606 GN=MYO1C PE=1 SV=1;sp|O00159-3|MYO1C_HUMAN Isoform 3 of Unconventional myosin-Ic OS=Homo sapiens OX=9606 GN=MYO1C;sp|O00159|MYO1C_HUMAN Unconventional myosin-Ic OS=Homo sapiens OX=9606	20.9473	0.60206
2823	Q59E89;Q9UDY4;B4DNN2;C9JUL4	DnaJ homolog subfamily B member 4	DNAJB4	tr|Q59E89|Q59E89_HUMAN DnaJ (Hsp40) homolog, subfamily B, member 4 variant (Fragment) OS=Homo sapiens OX=9606 PE=2 SV=1;sp|Q9UDY4|DNJB4_HUMAN DnaJ homolog subfamily B member 4 OS=Homo sapiens OX=9606 GN=DNAJB4 PE=1 SV=1;tr|B4DNN2|B4DNN2_HUMAN DnaJ (Hsp40)	1.67771	0.873046
202	A0A024R333;Q6UXN9;C9JBU3;C9J355	WD repeat-containing protein 82	TMEM113;WDR82	tr|A0A024R333|A0A024R333_HUMAN Transmembrane protein 113, isoform CRA_a OS=Homo sapiens OX=9606 GN=TMEM113 PE=4 SV=1;sp|Q6UXN9|WDR82_HUMAN WD repeat-containing protein 82 OS=Homo sapiens OX=9606 GN=WDR82 PE=1 SV=1	-4.24817	1.0093
2226	O95155-2;O95155;O95155-4;B4E2Y2;O95155-3;K7EP75;K7ERA7;B1AQ61	Ubiquitin conjugation factor E4 B	UBE4B	sp|O95155-2|UBE4B_HUMAN Isoform 2 of Ubiquitin conjugation factor E4 B OS=Homo sapiens OX=9606 GN=UBE4B;sp|O95155|UBE4B_HUMAN Ubiquitin conjugation factor E4 B OS=Homo sapiens OX=9606 GN=UBE4B PE=1 SV=1;sp|O95155-4|UBE4B_HUMAN Isoform 4 of Ubiquitin conjug	1.64313	1.98194
1041	A0A2R8Y3X5;E5KLM2;E5KLM0;E5KLM1;E5KLL9;O60313;O60313-11;O60313-2;O60313-10;E5KLK0;A0A2R8YE78;A0A2R8YDM2;C9JMB8;E5KLJ9;O60313-13;O60313-9;A0A2R8YFD1;A0A2R8YGE5;A0A2R8YD53;A0A2R8Y4Q3;A0A2R8Y4G4;A0A2R8YE54;Q6PEK6;H7C141;C9JY58;H7C321;H7C3G2;A0A2R8Y5E2;A0A2R8Y5G3	Dynamin-like 120 kDa protein, mitochondrial;Dynamin-like 120 kDa protein, form S1	OPA1	tr|A0A2R8Y3X5|A0A2R8Y3X5_HUMAN Dynamin-like 120 kDa protein, mitochondrial OS=Homo sapiens OX=9606 GN=OPA1 PE=1 SV=1;tr|E5KLM2|E5KLM2_HUMAN Mitochondrial dynamin-like 120 kDa protein OS=Homo sapiens OX=9606 PE=3 SV=1;tr|E5KLM0|E5KLM0_HUMAN Mitochondrial dy	0.272185	2.71401
789	A0A0D9SEI3;A0A0D9SER5;A0A0D9SEN2;P21127-8;P21127-3;P21127-2;B4E3D9;P21127-6;P21127-9;P21127;Q5QPR3;Q9UQ88-4;Q9UQ88-3;Q9UQ88-2;A4VCI5;Q5QPR4;P21127-10;Q9UQ88;P21127-5;Q6P5Y5;P21127-12;P21127-4;Q96CA8;Q4VBY6;Q9UQ88-10;Q9UQ88-5;Q9UQ88-9;B4E0N4;B4E0M9;Q9UQ88-8;J3KS35;Q05C84;Q6PK02;Q59GL4;E7ESP2;Q3SWV2;A0A087WYI9;A0A087X1I0;Q5QPQ9;E9PFJ2;A0A024R065;A0A1B0H6K7;A0A024R0C4;A0A1B0GYL8;B4DII1;B4DWE4;Q13882	Cyclin-dependent kinase 11B;Cyclin-dependent kinase 11A	CDK11B;CDK11A;CDC2L1;CDC2L2	tr|A0A0D9SEI3|A0A0D9SEI3_HUMAN Cyclin-dependent kinase 11B OS=Homo sapiens OX=9606 GN=CDK11B PE=1 SV=1;tr|A0A0D9SER5|A0A0D9SER5_HUMAN Cyclin-dependent kinase 11B OS=Homo sapiens OX=9606 GN=CDK11B PE=1 SV=1;tr|A0A0D9SEN2|A0A0D9SEN2_HUMAN Cyclin-dependent ki	-3.44597	1.58094
1265	Q2VF42;Q2Q9H2;B4DYA7;A8K8D9;P11413;P11413-3;P11413-2;Q2Q9B7;E7EM57;E7EUI8;E9PD92;Q0PHS1;A7IZZ3;A0A2H4QGB6;A0A2H4QGB2;Q0PHS6;A2IBT6;B6ZHS6;Q0PHS5;A0A2H4QGB8	Glucose-6-phosphate 1-dehydrogenase	G6PD	tr|Q2VF42|Q2VF42_HUMAN Glucose-6-phosphate 1-dehydrogenase (Fragment) OS=Homo sapiens OX=9606 GN=G6PD PE=3 SV=1;tr|Q2Q9H2|Q2Q9H2_HUMAN Glucose-6-phosphate 1-dehydrogenase (Fragment) OS=Homo sapiens OX=9606 GN=G6PD PE=3 SV=1;tr|B4DYA7|B4DYA7_HUMAN Glucose-6	1.61984	0.505268
2499	P52943;Q53FN1;P52943-2;H0YFA4;H0YHD8	Cysteine-rich protein 2	CRIP2	sp|P52943|CRIP2_HUMAN Cysteine-rich protein 2 OS=Homo sapiens OX=9606 GN=CRIP2 PE=1 SV=1;tr|Q53FN1|Q53FN1_HUMAN Cysteine-rich protein 2 variant (Fragment) OS=Homo sapiens OX=9606 PE=2 SV=1;sp|P52943-2|CRIP2_HUMAN Isoform 2 of Cysteine-rich protein 2 OS=Hom	-5.02772	0.895844
890	A0A0U1RQF0;P49327;Q6PJJ3;A0A0U1RRG3;A0A1B0GTR5;Q13587;J3KTF0	Fatty acid synthase;[Acyl-carrier-protein] S-acetyltransferase;[Acyl-carrier-protein] S-malonyltransferase;3-oxoacyl-[acyl-carrier-protein] synthase;3-oxoacyl-[acyl-carrier-protein] reductase;3-hydroxyacyl-[acyl-carrier-protein] dehydratase;Enoyl-[acyl-carrier-protein] reductase;Oleoyl-[acyl-carrier-protein] hydrolase	FASN	tr|A0A0U1RQF0|A0A0U1RQF0_HUMAN Fatty acid synthase OS=Homo sapiens OX=9606 GN=FASN PE=1 SV=1;sp|P49327|FAS_HUMAN Fatty acid synthase OS=Homo sapiens OX=9606 GN=FASN PE=1 SV=3	-0.671164	0.911323
3402	Q9Y3I0;B4DNA0;B4DNG5;B4DXF1	tRNA-splicing ligase RtcB homolog	RTCB	sp|Q9Y3I0|RTCB_HUMAN tRNA-splicing ligase RtcB homolog OS=Homo sapiens OX=9606 GN=RTCB PE=1 SV=1;tr|B4DNA0|B4DNA0_HUMAN cDNA FLJ58027 OS=Homo sapiens OX=9606 PE=2 SV=1	-7.26971	3.0983
3049	Q8NDT2;Q8NDT2-2;Q0VA89;Q13722	Putative RNA-binding protein 15B	RBM15B	sp|Q8NDT2|RB15B_HUMAN Putative RNA-binding protein 15B OS=Homo sapiens OX=9606 GN=RBM15B PE=1 SV=3;sp|Q8NDT2-2|RB15B_HUMAN Isoform 2 of Putative RNA-binding protein 15B OS=Homo sapiens OX=9606 GN=RBM15B	-0.259394	0.390994
3426	Q9Y6M0-3;Q9Y6M0-2;Q9Y6M0;I3L0U2;I3L3C7;Q7RTY9	Testisin	PRSS21	sp|Q9Y6M0-3|TEST_HUMAN Isoform 3 of Testisin OS=Homo sapiens OX=9606 GN=PRSS21;sp|Q9Y6M0-2|TEST_HUMAN Isoform 2 of Testisin OS=Homo sapiens OX=9606 GN=PRSS21;sp|Q9Y6M0|TEST_HUMAN Testisin OS=Homo sapiens OX=9606 GN=PRSS21 PE=1 SV=1;tr|I3L0U2|I3L0U2_HUMAN T	0.349544	0.532045
431	Q53GB9;A0A024R8Z1;Q5VV89;O14880;Q5VV87	Microsomal glutathione S-transferase 3	MGST3	tr|Q53GB9|Q53GB9_HUMAN Microsomal glutathione S-transferase 3 variant (Fragment) OS=Homo sapiens OX=9606 PE=2 SV=1;tr|A0A024R8Z1|A0A024R8Z1_HUMAN Microsomal glutathione S-transferase 3, isoform CRA_a OS=Homo sapiens OX=9606 GN=MGST3 PE=4 SV=1;tr|Q5VV89|Q5V	22.303	0.789514
2431	P38159;H3BT71;P38159-2;H0Y6E7;B4E352;H3BR27;P38159-3;B3KRG5;H3BUY5;H3BNC1;A8K8A6;O75526;Q8N7X1;F1T0J8;Q8IZ40	RNA-binding motif protein, X chromosome;RNA-binding motif protein, X chromosome, N-terminally processed	RBMX	sp|P38159|RBMX_HUMAN RNA-binding motif protein, X chromosome OS=Homo sapiens OX=9606 GN=RBMX PE=1 SV=3;tr|H3BT71|H3BT71_HUMAN RNA-binding motif protein, X chromosome OS=Homo sapiens OX=9606 GN=RBMX PE=1 SV=1;sp|P38159-2|RBMX_HUMAN Isoform 2 of RNA-binding	-4.67506	1.38002
1863	E7ENV7;Q86YQ8;Q86YQ8-2;Q8N7E6;Q9HCH3;Q8IYJ1;A0A0J9YWU8;A0A0J9YWA1;A0A087WX62;Q9HCH3-2;Q8IYJ1-2;Q4G168;B3KWK1;B2RD40;A0A024R994;A8K8A4;B7Z370;Q96FN4-2;O75131;Q96FN4;Q96A23;O95741;Q9UBL6-2;Q96A23-2;O95741-2;Q9UBL6	Copine-8	CPNE8	tr|E7ENV7|E7ENV7_HUMAN Copine-8 OS=Homo sapiens OX=9606 GN=CPNE8 PE=1 SV=2;sp|Q86YQ8|CPNE8_HUMAN Copine-8 OS=Homo sapiens OX=9606 GN=CPNE8 PE=1 SV=2;sp|Q86YQ8-2|CPNE8_HUMAN Isoform 2 of Copine-8 OS=Homo sapiens OX=9606 GN=CPNE8	1.42302	1.52325
3062	Q8TB61-3;Q8TB61-2;Q8TB61;B3KVY9;Q8TB61-5;Q8TB61-4	Adenosine 3-phospho 5-phosphosulfate transporter 1	SLC35B2	sp|Q8TB61-3|S35B2_HUMAN Isoform 3 of Adenosine 3-phospho 5-phosphosulfate transporter 1 OS=Homo sapiens OX=9606 GN=SLC35B2;sp|Q8TB61-2|S35B2_HUMAN Isoform 2 of Adenosine 3-phospho 5-phosphosulfate transporter 1 OS=Homo sapiens OX=9606 GN=SLC35B2;sp|Q8T	0.459713	0.348292
1486	Q6I9T8;B3KUN1;P67775;B3KQ51;Q8WZ56;Q5U0I7;B3KRM2;A0A140VJS0;P67775-2;P62714;E5RFI3;E5RHP4;E7ESG8;E5RHC1;H0YBN9;H0YC23;H3BV22;H3BTA2;Q5U086;A0A024R625;B7Z2C5;P60510	Serine/threonine-protein phosphatase;Serine/threonine-protein phosphatase 2A catalytic subunit alpha isoform;Serine/threonine-protein phosphatase 2A catalytic subunit beta isoform	PPP2CA;PPP2CB	tr|Q6I9T8|Q6I9T8_HUMAN Serine/threonine-protein phosphatase OS=Homo sapiens OX=9606 GN=PPP2CA PE=2 SV=1;tr|B3KUN1|B3KUN1_HUMAN Serine/threonine-protein phosphatase OS=Homo sapiens OX=9606 GN=PPP2CA PE=2 SV=1;sp|P67775|PP2AA_HUMAN Serine/threonine-protein p	1.76271	1.19008
243	A0A0A0MS29;A0A024R491;Q9GZY8-2;Q9GZY8;H7C433;Q9GZY8-4;Q9GZY8-5;Q9GZY8-3;E9PPW6;E9PQX8;C9JHF5	Mitochondrial fission factor	MFF;C2orf33	tr|A0A0A0MS29|A0A0A0MS29_HUMAN Mitochondrial fission factor OS=Homo sapiens OX=9606 GN=MFF PE=1 SV=1;tr|A0A024R491|A0A024R491_HUMAN Chromosome 2 open reading frame 33, isoform CRA_a OS=Homo sapiens OX=9606 GN=C2orf33 PE=4 SV=1;sp|Q9GZY8-2|MFF_HUMAN Isoform	1.25353	1.22014
3041	Q8NBX0	Saccharopine dehydrogenase-like oxidoreductase	SCCPDH	sp|Q8NBX0|SCPDL_HUMAN Saccharopine dehydrogenase-like oxidoreductase OS=Homo sapiens OX=9606 GN=SCCPDH PE=1 SV=1	21.2949	0.686593
2651	Q12797-10;Q12797;B8Y0L3;E5RHK2;A0A087WW51;E5RHJ2;G3XAN5;E5RG29;B7ZM96;B4DQ07;Q6PJH4;E5RG56;B3GQE5;Q12797-7;Q12797-4;Q12797-3;Q12797-9;Q12797-6;Q12797-11;Q12797-5;Q12797-8;Q12797-2	Aspartyl/asparaginyl beta-hydroxylase	ASPH	sp|Q12797-10|ASPH_HUMAN Isoform 10 of Aspartyl/asparaginyl beta-hydroxylase OS=Homo sapiens OX=9606 GN=ASPH;sp|Q12797|ASPH_HUMAN Aspartyl/asparaginyl beta-hydroxylase OS=Homo sapiens OX=9606 GN=ASPH PE=1 SV=3	-1.59631	1.23587
2130	O15042-2;E7ET15	U2 snRNP-associated SURP motif-containing protein	U2SURP	sp|O15042-2|SR140_HUMAN Isoform 2 of U2 snRNP-associated SURP motif-containing protein OS=Homo sapiens OX=9606 GN=U2SURP;tr|E7ET15|E7ET15_HUMAN U2 snRNP-associated SURP motif-containing protein OS=Homo sapiens OX=9606 GN=U2SURP PE=1 SV=1	0.30817	0.335636
2705	Q14566;Q4ZG57;B4DRF6;B4E0N7	DNA replication licensing factor MCM6	MCM6	sp|Q14566|MCM6_HUMAN DNA replication licensing factor MCM6 OS=Homo sapiens OX=9606 GN=MCM6 PE=1 SV=1;tr|Q4ZG57|Q4ZG57_HUMAN DNA helicase (Fragment) OS=Homo sapiens OX=9606 GN=MCM6 PE=3 SV=1	-0.813597	0.837087
1676	B7Z3M7;Q7Z2I8;B7Z588;D3DSR9;Q6FH58;B5BU36;O14763-2;O14763	Tumor necrosis factor receptor superfamily member 10B	DKFZp686A24188;TNFRSF10B	tr|B7Z3M7|B7Z3M7_HUMAN cDNA FLJ59908, highly similar to Tumor necrosis factor receptor superfamily member 10B OS=Homo sapiens OX=9606 PE=2 SV=1;tr|Q7Z2I8|Q7Z2I8_HUMAN Uncharacterized protein DKFZp686A24188 OS=Homo sapiens OX=9606 GN=DKFZp686A24188 PE=2 SV=	1.39089	0.757474
2423	Q53YD8;P36404;V9GYD0;B4DGG0;P36404-2	ADP-ribosylation factor-like protein 2	hCG_23373;ARL2	tr|Q53YD8|Q53YD8_HUMAN ADP-ribosylation factor-like 2 OS=Homo sapiens OX=9606 GN=hCG_23373 PE=2 SV=1;sp|P36404|ARL2_HUMAN ADP-ribosylation factor-like protein 2 OS=Homo sapiens OX=9606 GN=ARL2 PE=1 SV=4	0.624872	1.28381
105	A8K6H9;A0A024R0W3;Q96QD8;Q96QD8-2;F8VUY8	Sodium-coupled neutral amino acid transporter 2	SLC38A2	tr|A8K6H9|A8K6H9_HUMAN cDNA FLJ75876, highly similar to Homo sapiens solute carrier family 38, member 2 (SLC38A2), mRNA OS=Homo sapiens OX=9606 PE=2 SV=1;tr|A0A024R0W3|A0A024R0W3_HUMAN Solute carrier family 38, member 2, isoform CRA_b OS=Homo sapiens OX=96	1.29604	0.672638
2337	P16402	Histone H1.3	HIST1H1D	sp|P16402|H13_HUMAN Histone H1.3 OS=Homo sapiens OX=9606 GN=HIST1H1D PE=1 SV=2	-1.83228	1.23389
2991	Q86Y79;A0A096LP22;C9J7Z1;A0A096LP34;A0A096LPA3	Probable peptidyl-tRNA hydrolase	PTRH1	sp|Q86Y79|PTH_HUMAN Probable peptidyl-tRNA hydrolase OS=Homo sapiens OX=9606 GN=PTRH1 PE=1 SV=1;tr|A0A096LP22|A0A096LP22_HUMAN Probable peptidyl-tRNA hydrolase (Fragment) OS=Homo sapiens OX=9606 GN=PTRH1 PE=1 SV=1;tr|C9J7Z1|C9J7Z1_HUMAN Probable peptidyl-t	21.8701	0.967617
495	A0A024RAV2;P46063;F8WA66;F8WD97;F5H2L2;F5H4P4;F5H3W0;F5GYB7	ATP-dependent DNA helicase Q1	RECQL	tr|A0A024RAV2|A0A024RAV2_HUMAN ATP-dependent DNA helicase OS=Homo sapiens OX=9606 GN=RECQL PE=3 SV=1;sp|P46063|RECQ1_HUMAN ATP-dependent DNA helicase Q1 OS=Homo sapiens OX=9606 GN=RECQL PE=1 SV=3	-0.890501	0.849512
469	E7ETZ4;B3KM68;A0A024RA42;Q9Y6E2;B7Z4K8;B5MCH7;B5MCE7;Q75MG1;E9PFD4;E9PFE3;C9JF98;F8WDX8;E7EMS9;Q9Y6E2-2;B7Z6N5	Basic leucine zipper and W2 domain-containing protein 2	BZW2	tr|E7ETZ4|E7ETZ4_HUMAN Basic leucine zipper and W2 domain-containing protein 2 (Fragment) OS=Homo sapiens OX=9606 GN=BZW2 PE=1 SV=1;tr|B3KM68|B3KM68_HUMAN cDNA FLJ10398 fis, clone NT2RM4000349, highly similar to Homo sapiens basic leucine zipper and W2 dom	2.38116	0.655032
1949	G1UI16;Q29RF7;Q29RF7-3;Q96DB6;H0Y9L6;B3KMN2;H0Y9L9;H0Y9X6	Sister chromatid cohesion protein PDS5 homolog A	PDS5A	tr|G1UI16|G1UI16_HUMAN SCC-112 protein, isoform CRA_b OS=Homo sapiens OX=9606 GN=PDS5A PE=2 SV=1;sp|Q29RF7|PDS5A_HUMAN Sister chromatid cohesion protein PDS5 homolog A OS=Homo sapiens OX=9606 GN=PDS5A PE=1 SV=1;sp|Q29RF7-3|PDS5A_HUMAN Isoform 2 of Sister c	0.104197	0.396907
930	A0A140VJX1;P24752;H0YEL7;P24752-2;E9PRQ6;E9PKF3	Acetyl-CoA acetyltransferase, mitochondrial	ACAT1	tr|A0A140VJX1|A0A140VJX1_HUMAN Testicular tissue protein Li 198 OS=Homo sapiens OX=9606 PE=2 SV=1;sp|P24752|THIL_HUMAN Acetyl-CoA acetyltransferase, mitochondrial OS=Homo sapiens OX=9606 GN=ACAT1 PE=1 SV=1	-2.1837	1.17544
2851	Q5SSJ5;B0QZK4;Q5SSJ5-2;X6RGJ2;Q5SSJ5-3;Q5SWC8;B0QZK9;B0QZK8;Q5SSJ5-5;B4E0N8	Heterochromatin protein 1-binding protein 3	HP1BP3	sp|Q5SSJ5|HP1B3_HUMAN Heterochromatin protein 1-binding protein 3 OS=Homo sapiens OX=9606 GN=HP1BP3 PE=1 SV=1;tr|B0QZK4|B0QZK4_HUMAN Heterochromatin protein 1-binding protein 3 (Fragment) OS=Homo sapiens OX=9606 GN=HP1BP3 PE=1 SV=1;sp|Q5SSJ5-2|HP1B3_HUMAN	-0.058073	3.00256
118	B3KMB1;A0A024R158;O95347;B7ZLZ7;A8K984;O95347-2;Q2KQ72;Q05BV1;B3KM27;A0JLM9;Q6IPS5;Q6P712;Q05D74;Q32Q15;A0A0C4DGE5;Q5T821;Q7Z2X1;Q13497	Structural maintenance of chromosomes protein;Structural maintenance of chromosomes protein 2	SMC2L1;SMC2	tr|B3KMB1|B3KMB1_HUMAN Structural maintenance of chromosomes protein OS=Homo sapiens OX=9606 PE=2 SV=1;tr|A0A024R158|A0A024R158_HUMAN Structural maintenance of chromosomes protein OS=Homo sapiens OX=9606 GN=SMC2L1 PE=3 SV=1;sp|O95347|SMC2_HUMAN Structural	-0.456297	0.820383
252	A0A087WX29;A0A0A0N0L3;A0A024R4E2;Q13148;B1AKP7;G3V162;A0A087X260;A0A087WYY0;K7EJM5;A0A0A0N0N3;A0A0A0N0M3;K7EN94;B4DRW3;A0A087WXQ5;A0A087WV68;A0A1W2PNU8;Q13148-4;K7EJ99;A0A0A0MSV7;A0A087WW61;A0A087WX67;A0A087WXV3;A0A087WTZ4;K7EL26;A0A087WYE7;A0A087WZC9	TAR DNA-binding protein 43	TARDBP;TDP43	tr|A0A087WX29|A0A087WX29_HUMAN TAR DNA-binding protein 43 (Fragment) OS=Homo sapiens OX=9606 GN=TARDBP PE=1 SV=1;tr|A0A0A0N0L3|A0A0A0N0L3_HUMAN TDP43 isoform H OS=Homo sapiens OX=9606 GN=TDP43 PE=2 SV=1;tr|A0A024R4E2|A0A024R4E2_HUMAN TAR DNA binding protei	-0.892087	1.43899
3271	Q9NR12;Q9NR12-2;D6RH06;Q9NR12-5;Q9NR12-6;Q9NR12-4;D6RF83;H7BYK4;Q9NR12-3;D6RAN1;H0Y8W6	PDZ and LIM domain protein 7	PDLIM7	sp|Q9NR12|PDLI7_HUMAN PDZ and LIM domain protein 7 OS=Homo sapiens OX=9606 GN=PDLIM7 PE=1 SV=1;sp|Q9NR12-2|PDLI7_HUMAN Isoform 2 of PDZ and LIM domain protein 7 OS=Homo sapiens OX=9606 GN=PDLIM7	-2.51504	1.30919
2475	P49756;P49756-2;P49756-3;E9PQU5;H0YE46;E9PSE8;P49756-4	RNA-binding protein 25	RBM25	sp|P49756|RBM25_HUMAN RNA-binding protein 25 OS=Homo sapiens OX=9606 GN=RBM25 PE=1 SV=3;sp|P49756-2|RBM25_HUMAN Isoform 2 of RNA-binding protein 25 OS=Homo sapiens OX=9606 GN=RBM25;sp|P49756-3|RBM25_HUMAN Isoform 3 of RNA-binding protein 25 OS=Homo sapiens	-2.66174	1.33312
73	B2RAW0;A0A024R036;P98082-2;P98082-3;P98082;D6RFF7;D6REB1;D6RIA5	Disabled homolog 2	DAB2	tr|B2RAW0|B2RAW0_HUMAN cDNA, FLJ95154, highly similar to Homo sapiens disabled homolog 2, mitogen-responsive phosphoprotein (Drosophila) (DAB2), mRNA OS=Homo sapiens OX=9606 PE=2 SV=1;tr|A0A024R036|A0A024R036_HUMAN Disabled homolog 2, mitogen-responsive ph	21.2146	0.642513
2266	Q5TZZ9;P04083;Q5T3N1;Q5T3N0;B4DL19	Annexin;Annexin A1	ANXA1	tr|Q5TZZ9|Q5TZZ9_HUMAN Annexin OS=Homo sapiens OX=9606 GN=ANXA1 PE=2 SV=1;sp|P04083|ANXA1_HUMAN Annexin A1 OS=Homo sapiens OX=9606 GN=ANXA1 PE=1 SV=2;tr|Q5T3N1|Q5T3N1_HUMAN Annexin (Fragment) OS=Homo sapiens OX=9606 GN=ANXA1 PE=1 SV=1;tr|Q5T3N0|Q5T3N0_HUMA	21.7545	1.01912
2154	O43324;D6RBD7;C9J1V9;O43324-2;H0YAL7;D6RCQ0;H0YAH9	Eukaryotic translation elongation factor 1 epsilon-1	EEF1E1;EEF1E1-BLOC1S5	sp|O43324|MCA3_HUMAN Eukaryotic translation elongation factor 1 epsilon-1 OS=Homo sapiens OX=9606 GN=EEF1E1 PE=1 SV=1;tr|D6RBD7|D6RBD7_HUMAN Eukaryotic translation elongation factor 1 epsilon-1 OS=Homo sapiens OX=9606 GN=EEF1E1 PE=4 SV=1;tr|C9J1V9|C9J1V9_H	-0.662997	0.964555
2896	Q6IAA8;H0YFI1;B4DUK2;F5H479;F5GX19;F5H3Y3	Ragulator complex protein LAMTOR1	LAMTOR1	sp|Q6IAA8|LTOR1_HUMAN Ragulator complex protein LAMTOR1 OS=Homo sapiens OX=9606 GN=LAMTOR1 PE=1 SV=2;tr|H0YFI1|H0YFI1_HUMAN Ragulator complex protein LAMTOR1 (Fragment) OS=Homo sapiens OX=9606 GN=LAMTOR1 PE=1 SV=1;tr|B4DUK2|B4DUK2_HUMAN cDNA FLJ51311 OS=Ho	-1.5336	0.431309
2936	Q6YHK3;Q6YHK3-4;Q6YHK3-2;Q6YHK3-3	CD109 antigen	CD109	sp|Q6YHK3|CD109_HUMAN CD109 antigen OS=Homo sapiens OX=9606 GN=CD109 PE=1 SV=2;sp|Q6YHK3-4|CD109_HUMAN Isoform 4 of CD109 antigen OS=Homo sapiens OX=9606 GN=CD109;sp|Q6YHK3-2|CD109_HUMAN Isoform 2 of CD109 antigen OS=Homo sapiens OX=9606 GN=CD109;sp|Q6YHK3	3.25506	1.07229
3040	Q8NBU5;B4E2J1;Q8NBU5-2	ATPase family AAA domain-containing protein 1	ATAD1	sp|Q8NBU5|ATAD1_HUMAN ATPase family AAA domain-containing protein 1 OS=Homo sapiens OX=9606 GN=ATAD1 PE=1 SV=1;tr|B4E2J1|B4E2J1_HUMAN cDNA FLJ54240, highly similar to ATPase family AAA domain-containing protein 1 OS=Homo sapiens OX=9606 PE=2 SV=1;sp|Q8NBU5	21.6826	0.963411
3258	Q9HC03;Q9Y673;Q9Y673-2;B4DR67	Dolichyl-phosphate beta-glucosyltransferase	ALG5	tr|Q9HC03|Q9HC03_HUMAN Dolichyl-phosphate beta-glucosyltransferase OS=Homo sapiens OX=9606 PE=2 SV=1;sp|Q9Y673|ALG5_HUMAN Dolichyl-phosphate beta-glucosyltransferase OS=Homo sapiens OX=9606 GN=ALG5 PE=1 SV=1;sp|Q9Y673-2|ALG5_HUMAN Isoform 2 of Dolichyl-pho	3.63585	0.449392
2310	P10909-4;P10909;P10909-5;P10909-2;E7ERK6;H0YC35;H0YLK8;E7ETB4;P10909-3;Q8IWL5;H0YAS8;B4DW11;E5RG36;E5RGB0;E5RH61;E5RJZ5;Q6LDQ3;Q8IWM0	Clusterin;Clusterin beta chain;Clusterin alpha chain;Clusterin	CLU	sp|P10909-4|CLUS_HUMAN Isoform 4 of Clusterin OS=Homo sapiens OX=9606 GN=CLU;sp|P10909|CLUS_HUMAN Clusterin OS=Homo sapiens OX=9606 GN=CLU PE=1 SV=1;sp|P10909-5|CLUS_HUMAN Isoform 5 of Clusterin OS=Homo sapiens OX=9606 GN=CLU;sp|P10909-2|CLUS_HUMAN Isoform	-1.26538	1.15996
3298	Q9NXH8	Torsin-4A	TOR4A	sp|Q9NXH8|TOR4A_HUMAN Torsin-4A OS=Homo sapiens OX=9606 GN=TOR4A PE=1 SV=2	21.9437	1.05817
3348	Q9UHX1-6;A0A0J9YYL3;A0A0J9YVP6;Q9UHX1-4;Q9UHX1-5;Q9UHX1-2;A0A0J9YXJ8;A0A0J9YXX5;Q9UHX1-3;Q9UHX1;A0A0J9YVR6;E9PQ56;A0A0J9YWM1;H0YEM1;E9PN18;E9PMU7;H0YCP8;E9PL19	Poly(U)-binding-splicing factor PUF60	PUF60	sp|Q9UHX1-6|PUF60_HUMAN Isoform 6 of Poly(U)-binding-splicing factor PUF60 OS=Homo sapiens OX=9606 GN=PUF60;tr|A0A0J9YYL3|A0A0J9YYL3_HUMAN Poly(U)-binding-splicing factor PUF60 (Fragment) OS=Homo sapiens OX=9606 GN=PUF60 PE=1 SV=1;tr|A0A0J9YVP6|A0A0J9YVP6_	1.17622	0.846805
2509	Q53ZR1;P55011-3;P55011;B7ZM24;G3XAL9;Q59GB7	Solute carrier family 12 member 2	SLC12A2	tr|Q53ZR1|Q53ZR1_HUMAN Bumetanide-sensitive Na-K-Cl cotransporter OS=Homo sapiens OX=9606 GN=SLC12A2 PE=2 SV=1;sp|P55011-3|S12A2_HUMAN Isoform 2 of Solute carrier family 12 member 2 OS=Homo sapiens OX=9606 GN=SLC12A2;sp|P55011|S12A2_HUMAN Solute carrier fa	-0.771821	0.906842
2517	P55735;A8MXL6;Q59FA6;Q53GB2;P55735-2;P55735-4;P55735-3;A4UCS7;A8MWR8;E7ERC8	Protein SEC13 homolog	SEC13	sp|P55735|SEC13_HUMAN Protein SEC13 homolog OS=Homo sapiens OX=9606 GN=SEC13 PE=1 SV=3;tr|A8MXL6|A8MXL6_HUMAN Protein SEC13 homolog OS=Homo sapiens OX=9606 GN=SEC13 PE=1 SV=1;tr|Q59FA6|Q59FA6_HUMAN SEC13-like 1 isoform b variant (Fragment) OS=Homo sapiens	-1.35815	1.30175
735	A0A0A0MSK5;J3KN66;Q5JTV8;Q5JTV8-3;H0Y4R4;Q5JTV8-2;H0YD16	Torsin-1A-interacting protein 1	TOR1AIP1	tr|A0A0A0MSK5|A0A0A0MSK5_HUMAN Torsin-1A-interacting protein 1 OS=Homo sapiens OX=9606 GN=TOR1AIP1 PE=1 SV=1;tr|J3KN66|J3KN66_HUMAN Torsin-1A-interacting protein 1 OS=Homo sapiens OX=9606 GN=TOR1AIP1 PE=1 SV=1;sp|Q5JTV8|TOIP1_HUMAN Torsin-1A-interacting pr	21.3649	0.55573
2838	Q5JTH9-2;Q5JTH9-3;Q5JTH9;B3KMR5;B3KY97;B3KPQ2;A0A087X1U8	RRP12-like protein	RRP12	sp|Q5JTH9-2|RRP12_HUMAN Isoform 2 of RRP12-like protein OS=Homo sapiens OX=9606 GN=RRP12;sp|Q5JTH9-3|RRP12_HUMAN Isoform 3 of RRP12-like protein OS=Homo sapiens OX=9606 GN=RRP12;sp|Q5JTH9|RRP12_HUMAN RRP12-like protein OS=Homo sapiens OX=9606 GN=RRP12 PE=1	0.217504	0.410261
2955	Q7KZN9-2;Q7KZN9;B4DQM2	Cytochrome c oxidase assembly protein COX15 homolog	COX15	sp|Q7KZN9-2|COX15_HUMAN Isoform 2 of Cytochrome c oxidase assembly protein COX15 homolog OS=Homo sapiens OX=9606 GN=COX15;sp|Q7KZN9|COX15_HUMAN Cytochrome c oxidase assembly protein COX15 homolog OS=Homo sapiens OX=9606 GN=COX15 PE=1 SV=1	1.04516	0.438903
1294	A8KA84;A0A024RBQ5;Q9Y6K5;F8VS35;F8VWK9	2-5-oligoadenylate synthase 3	OAS3	tr|A8KA84|A8KA84_HUMAN cDNA FLJ78682, highly similar to Homo sapiens 2-5-oligoadenylate synthetase 3, 100kDa (OAS3), mRNA OS=Homo sapiens OX=9606 PE=2 SV=1;tr|A0A024RBQ5|A0A024RBQ5_HUMAN 2-5-oligoadenylate synthetase 3, 100kDa, isoform CRA_a OS=Homo sa	1.20371	0.965726
1767	C9JJ19;P82930;A4UCR9	28S ribosomal protein S34, mitochondrial	MRPS34	tr|C9JJ19|C9JJ19_HUMAN 28S ribosomal protein S34, mitochondrial OS=Homo sapiens OX=9606 GN=MRPS34 PE=1 SV=2;sp|P82930|RT34_HUMAN 28S ribosomal protein S34, mitochondrial OS=Homo sapiens OX=9606 GN=MRPS34 PE=1 SV=2;tr|A4UCR9|A4UCR9_HUMAN Mitochondrial 28S r	1.98053	0.889092
1546	E9PJL7;E9PRA8;B4DIA6;E9PR44;V9HW27;P02511;E9PS12;A0A140G961;C3VMY8;E9PRS4;E9PNH7;A0A024R3B9	Alpha-crystallin B chain	CRYAB;HEL-S-101	tr|E9PJL7|E9PJL7_HUMAN Alpha-crystallin B chain (Fragment) OS=Homo sapiens OX=9606 GN=CRYAB PE=1 SV=8;tr|E9PRA8|E9PRA8_HUMAN Alpha-crystallin B chain OS=Homo sapiens OX=9606 GN=CRYAB PE=1 SV=1;tr|B4DIA6|B4DIA6_HUMAN cDNA FLJ57064, highly similar to Alpha c	21.1792	0.60206
1308	B4E2U7;B4DL76;F8W9L0;B4DS34;B4E2K5;D0VY79;B2R617;A8MYV6;Q16665-2;Q16665;Q16665-3	Hypoxia-inducible factor 1-alpha	HIF1A	tr|B4E2U7|B4E2U7_HUMAN cDNA FLJ57096, highly similar to Hypoxia-inducible factor 1 alpha OS=Homo sapiens OX=9606 PE=2 SV=1;tr|B4DL76|B4DL76_HUMAN cDNA FLJ54364, highly similar to Hypoxia-inducible factor 1 alpha OS=Homo sapiens OX=9606 PE=2 SV=1;tr|F8W9L0|	21.8141	0.884786
3197	Q9BW27;J3QL54;Q9BW27-3;J3KT10;Q9BW27-2;B4DYG7;F5H0W7;B3KW81;J3QLD4;J3QLH0;B7Z3C2;J3QLV0;J3KS87;J3QL91;J3QS63;J3KTC7;J3KSH3;J3KRC0	Nuclear pore complex protein Nup85	NUP85	sp|Q9BW27|NUP85_HUMAN Nuclear pore complex protein Nup85 OS=Homo sapiens OX=9606 GN=NUP85 PE=1 SV=1;tr|J3QL54|J3QL54_HUMAN Nuclear pore complex protein Nup85 OS=Homo sapiens OX=9606 GN=NUP85 PE=1 SV=1;sp|Q9BW27-3|NUP85_HUMAN Isoform 3 of Nuclear pore compl	0.83861	0.584854
240	Q53S54;A0A024R475;Q13618-2;Q13618;Q13618-3;B7Z600;A0A087WTG3;H7C1L6;A0A087X1R9;H7C399	Cullin-3	CUL3	tr|Q53S54|Q53S54_HUMAN Uncharacterized protein CUL3 (Fragment) OS=Homo sapiens OX=9606 GN=CUL3 PE=3 SV=1;tr|A0A024R475|A0A024R475_HUMAN Cullin 3, isoform CRA_a OS=Homo sapiens OX=9606 GN=CUL3 PE=3 SV=1;sp|Q13618-2|CUL3_HUMAN Isoform 2 of Cullin-3 OS=Homo s	1.81486	0.787795
2203	O75616;J3QSB2;J3QRV9;O75616-2;K7EQJ8;J3QT61	GTPase Era, mitochondrial	ERAL1	sp|O75616|ERAL1_HUMAN GTPase Era, mitochondrial OS=Homo sapiens OX=9606 GN=ERAL1 PE=1 SV=2;tr|J3QSB2|J3QSB2_HUMAN GTPase Era, mitochondrial (Fragment) OS=Homo sapiens OX=9606 GN=ERAL1 PE=1 SV=1;tr|J3QRV9|J3QRV9_HUMAN GTPase Era, mitochondrial (Fragment) OS	21.6084	0.690563
3085	Q8WUQ7;Q8WUQ7-2;K7ENY9;B4DSX7;K7EIU6	Cactin	CACTIN	sp|Q8WUQ7|CATIN_HUMAN Cactin OS=Homo sapiens OX=9606 GN=CACTIN PE=1 SV=3;sp|Q8WUQ7-2|CATIN_HUMAN Isoform 2 of Cactin OS=Homo sapiens OX=9606 GN=CACTIN;tr|K7ENY9|K7ENY9_HUMAN Cactin (Fragment) OS=Homo sapiens OX=9606 GN=CACTIN PE=1 SV=1;tr|B4DSX7|B4DSX7_HUM	2.15438	0.677596
1819	K7EMM8;D3DUE6;D3DUE7;Q49A26-2;Q49A26-3;Q49A26;Q49A26-5;Q49A26-4;K7EQB2;K7EPU6	Putative oxidoreductase GLYR1	GLYR1;N-PAC	tr|K7EMM8|K7EMM8_HUMAN Putative oxidoreductase GLYR1 (Fragment) OS=Homo sapiens OX=9606 GN=GLYR1 PE=1 SV=2;tr|D3DUE6|D3DUE6_HUMAN Cytokine-like nuclear factor n-pac, isoform CRA_c OS=Homo sapiens OX=9606 GN=N-PAC PE=4 SV=1;tr|D3DUE7|D3DUE7_HUMAN Cytokine-l	-0.00230453	0.34413
3122	Q96AY2;Q96AY2-2;H0Y9Z4	Crossover junction endonuclease EME1	EME1	sp|Q96AY2|EME1_HUMAN Crossover junction endonuclease EME1 OS=Homo sapiens OX=9606 GN=EME1 PE=1 SV=2;sp|Q96AY2-2|EME1_HUMAN Isoform 2 of Crossover junction endonuclease EME1 OS=Homo sapiens OX=9606 GN=EME1;tr|H0Y9Z4|H0Y9Z4_HUMAN Crossover junction endonucle	22.1585	1.91078
55	A0A024QZN4;V9HWK2;P18206-2;P18206;B3KXA2;B4E3Q9;B4DKC9;B4DTM7;P18206-3;A0A096LPE1	Vinculin	VCL;HEL114	tr|A0A024QZN4|A0A024QZN4_HUMAN Vinculin, isoform CRA_c OS=Homo sapiens OX=9606 GN=VCL PE=4 SV=1;tr|V9HWK2|V9HWK2_HUMAN Epididymis luminal protein 114 OS=Homo sapiens OX=9606 GN=HEL114 PE=2 SV=1;sp|P18206-2|VINC_HUMAN Isoform 1 of Vinculin OS=Homo sapiens O	21.5515	0.769453
1713	H3BVB1;H3BME1;H7C112;H3BPZ0;B7Z7Y9;Q6PCT2-2;Q6PCT2;Q6PCT2-3;H3BPI8	F-box/LRR-repeat protein 19	FBXL19	tr|H3BVB1|H3BVB1_HUMAN F-box/LRR-repeat protein 19 OS=Homo sapiens OX=9606 GN=FBXL19 PE=1 SV=1;tr|H3BME1|H3BME1_HUMAN F-box/LRR-repeat protein 19 OS=Homo sapiens OX=9606 GN=FBXL19 PE=1 SV=1;tr|H7C112|H7C112_HUMAN F-box/LRR-repeat protein 19 (Fragment) OS=H	-1.1131	1.19651
2691	Q13829;Q13829-2;J3QSD4;J3QS43;K7EM01	BTB/POZ domain-containing adapter for CUL3-mediated RhoA degradation protein 2	TNFAIP1	sp|Q13829|BACD2_HUMAN BTB/POZ domain-containing adapter for CUL3-mediated RhoA degradation protein 2 OS=Homo sapiens OX=9606 GN=TNFAIP1 PE=1 SV=1;sp|Q13829-2|BACD2_HUMAN Isoform 2 of BTB/POZ domain-containing adapter for CUL3-mediated RhoA degradation prot	22.7271	1.05472
2816	Q562R1	Beta-actin-like protein 2	ACTBL2	sp|Q562R1|ACTBL_HUMAN Beta-actin-like protein 2 OS=Homo sapiens OX=9606 GN=ACTBL2 PE=1 SV=2	21.2477	0.60206
3007	Q8IXB1;Q8IXB1-2;B3KNK5;Q86XS7;E7EP04;B4DP04;Q8IXB1-3;Q6YPB0;Q71S60;A0A087WXH7;H7C1G0;Q8N4C5	DnaJ homolog subfamily C member 10	DNAJC10	sp|Q8IXB1|DJC10_HUMAN DnaJ homolog subfamily C member 10 OS=Homo sapiens OX=9606 GN=DNAJC10 PE=1 SV=2;sp|Q8IXB1-2|DJC10_HUMAN Isoform 2 of DnaJ homolog subfamily C member 10 OS=Homo sapiens OX=9606 GN=DNAJC10;tr|B3KNK5|B3KNK5_HUMAN cDNA FLJ14795 fis, clone	1.47489	0.97025
1619	D3DVL7;B4DU42;Q969Z0;B3KRS4;B3KMT3;B3KM73;Q969Z0-2;H7C4R5;C9J7P5;C9IZN7;C9J5A2;C9J347	Protein TBRG4	TBRG4	tr|D3DVL7|D3DVL7_HUMAN Transforming growth factor beta regulator 4, isoform CRA_b OS=Homo sapiens OX=9606 GN=TBRG4 PE=4 SV=1;tr|B4DU42|B4DU42_HUMAN cDNA FLJ56153, highly similar to Homo sapiens transforming growth factor beta regulator 4 (TBRG4), transcrip	22.1135	1.02643
1931	F8VU90;Q9NYL4-2;Q9NYL4;Q86SR8;H0YHM7	Peptidyl-prolyl cis-trans isomerase;Peptidyl-prolyl cis-trans isomerase FKBP11	FKBP11	tr|F8VU90|F8VU90_HUMAN Peptidylprolyl isomerase OS=Homo sapiens OX=9606 GN=FKBP11 PE=1 SV=1;sp|Q9NYL4-2|FKB11_HUMAN Isoform 2 of Peptidyl-prolyl cis-trans isomerase FKBP11 OS=Homo sapiens OX=9606 GN=FKBP11;sp|Q9NYL4|FKB11_HUMAN Peptidyl-prolyl cis-trans is	22.2023	1.78559
1585	B4DPZ5;B4DNU9;Q6NZI2;B3KRY5;Q6NZI2-2	Polymerase I and transcript release factor	PTRF	tr|B4DPZ5|B4DPZ5_HUMAN cDNA FLJ53495, highly similar to Polymerase I and transcript release factor OS=Homo sapiens OX=9606 PE=2 SV=1;tr|B4DNU9|B4DNU9_HUMAN cDNA FLJ55731, highly similar to Polymerase I and transcript release factor OS=Homo sapiens OX=9606	1.67819	0.676453
[truncated: 936 more rows]

## Sheet: Mock_cdu1 Hs proteins
id	Protein IDs	Protein names	Gene names	Fasta headers	Log 2 Fold change	-log10p
[truncated: 2,055 more rows]

## Sheet: L2_cdu1 Hs proteins
id	Protein IDs	Protein names	Gene names	Fasta headers	Log2 Fold change	-log10p
[truncated: 1,938 more rows]

[truncated: 6 more sheets: Mock_L2 CT proteins, Mock_cdu1 CT proteins, L2_cdu1 CT proteins, Mock_L2 Ub peptides, Mock_cdu1 Ub peptides, L2 vs cdu1 Ub peptides]
