# Supplementary material for: The acetylase activity of Cdu1 regulates bacterial exit from infected cells by protecting Chlamydia effectors from degradation
Source: eLife journal article supplement (doi:10.7554/elife.87386), 2023-05-12
Supplement: fig1-figsupp4-data2 [file Heatmap summary table_enriched infection with cdu1 GII only.xlsx]

## Sheet: Summary table
GroupID	Category	Term	Description	LogP	Log(q-value)	Symbols
1_Summary	GO Biological Processes	GO:0008610	lipid biosynthetic process	-2.68143	0	PIP5K1A,LPGAT1,PTGES2

## Sheet: Annotation
MyList	Gene ID	Type	Tax ID	Homologene Gene ID	Homologene Gene Tax ID	Gene Symbol	Description	Biological Process (GO)	Kinase Class (UniProt)	Protein Function (Protein Atlas)	Subcellular Location (Protein Atlas)	Drug (DrugBank)	Canonical Pathways_x000D_	Hallmark Gene Sets_x000D_	GO:0008610 lipid biosynthetic process
A0A024QZY5	8899	uniprot	H. sapiens	8899	H. sapiens	PRPF4B	pre-mRNA processing factor 4B	GO:0045292 mRNA cis splicing, via spliceosome;GO:0000377 RNA splicing, via transesterification reactions with bulged adenosine as nucleophile;GO:0000398 mRNA splicing, via spliceosome	CMGC Ser/Thr protein kinase family	Enzymes; Kinases:CMGC Ser/Thr protein kinases; Predicted intracellular proteins; ENZYME proteins:Transferases	Nuclear speckles (Supported)	Fostamatinib		(M5901)HALLMARK G2M CHECKPOINT	0.0
A0A024R455						None	None	None	None	None	None	None	None	None	nan
A0A024RAI1	10096	uniprot	H. sapiens	10096	H. sapiens	ACTR3	actin related protein 3	GO:0016344 meiotic chromosome movement towards spindle pole;GO:0051305 chromosome movement towards spindle pole;GO:0070358 actin polymerization-dependent cell motility		Predicted intracellular proteins		N-[2-(2-methyl-1H-indol-3-yl)ethyl]thiophene-2-carboxamide; (2S)-2-(3-bromophenyl)-3-(5-chloro-2-hydroxyphenyl)-1,3-thiazolidin-4-one	(M16801)SIG REGULATION OF THE ACTIN CYTOSKELETON BY RHO GTPASES; (M5193)SIG CHEMOTAXIS; (M278)PID RAC1 PATHWAY	(M5923)HALLMARK PI3K AKT MTOR SIGNALING; (M5924)HALLMARK MTORC1 SIGNALING	0.0
A0A1U9X9D5						None	None	None	None	None	None	None	None	None	nan
A6PW57	8394	uniprot	H. sapiens	8394	H. sapiens	PIP5K1A	phosphatidylinositol-4-phosphate 5-kinase type 1 alpha	GO:0097178 ruffle assembly;GO:0010761 fibroblast migration;GO:0031529 ruffle organization		Enzymes; Predicted intracellular proteins; Cancer-related genes:Mutational cancer driver genes; ENZYME proteins:Transferases	Cytosol;Plasma membrane (Supported); Additional: Nucleoplasm		(M120)PID ARF6 DOWNSTREAM PATHWAY; (M243)PID ARF 3PATHWAY; (M184)PID ECADHERIN KERATINOCYTE PATHWAY		1.0
A7LNJ1	6574	uniprot	H. sapiens	6574	H. sapiens	SLC20A1	solute carrier family 20 member 1	GO:0035435 phosphate ion transmembrane transport;GO:0006817 phosphate ion transport;GO:0098661 inorganic anion transmembrane transport		Transporters:Electrochemical Potential-driven transporters	Golgi apparatus (Approved)			(M5896)HALLMARK TGF BETA SIGNALING; (M5902)HALLMARK APOPTOSIS	0.0
A8YXX5	23787	uniprot	H. sapiens	23787	H. sapiens	MTCH1	mitochondrial carrier 1	GO:0045161 neuronal ion channel clustering;GO:0042551 neuron maturation;GO:0006919 activation of cysteine-type endopeptidase activity involved in apoptotic process		Transporters:Electrochemical Potential-driven transporters					0.0
B4DGN8						None	None	None	None	None	None	None	None	None	nan
B5MCR8	55676	uniprot	H. sapiens	55676	H. sapiens	SLC30A6	solute carrier family 30 member 6	GO:0030070 insulin processing;GO:1901142 insulin metabolic process;GO:0071577 zinc ion transmembrane transport		Transporters:Electrochemical Potential-driven transporters	Golgi apparatus (Enhanced)				0.0
D6RFI3						None	None	None	None	None	None	None	None	None	nan
F6XEV2						None	None	None	None	None	None	None	None	None	nan
H0YNE5						None	None	None	None	None	None	None	None	None	nan
H0YNG3						None	None	None	None	None	None	None	None	None	nan
O14893	8487	uniprot	H. sapiens	8487	H. sapiens	GEMIN2	gem nuclear organelle associated protein 2	GO:1905215 negative regulation of RNA binding;GO:1905214 regulation of RNA binding;GO:0000387 spliceosomal snRNP assembly		Predicted intracellular proteins	Nuclear bodies;Nucleoplasm (Supported); Additional: Nucleoli				0.0
Q53GL1						None	None	None	None	None	None	None	None	None	nan
Q59FI2						None	None	None	None	None	None	None	None	None	nan
Q6IPN0						None	None	None	None	None	None	None	None	None	nan
Q86U70-3						None	None	None	None	None	None	None	None	None	nan
Q86VR6						None	None	None	None	None	None	None	None	None	nan
Q8NBU5	84896	uniprot	H. sapiens	84896	H. sapiens	ATAD1	ATPase family AAA domain containing 1	GO:0140570 extraction of mislocalized protein from mitochondrial outer membrane;GO:0140568 extraction of mislocalized protein from membrane;GO:0051967 negative regulation of synaptic transmission, glutamatergic		Disease related genes; Human disease related genes:Nervous system diseases:Other nervous and sensory system diseases	Nucleoli rim (Approved); Additional: Mitochondria				0.0
Q8TCJ2	201595	uniprot	H. sapiens	201595	H. sapiens	STT3B	STT3 oligosaccharyltransferase complex catalytic subunit B	GO:0043686 co-translational protein modification;GO:0018279 protein N-linked glycosylation via asparagine;GO:0018196 peptidyl-asparagine modification		Transporters; ENZYME proteins:Transferases; Disease related genes; Potential drug targets; Enzymes; Human disease related genes:Congenital disorders of metabolism:Congenital disorders of glycan/glycoprotein metabolism	Endoplasmic reticulum (Supported)				0.0
Q92604	9926	uniprot	H. sapiens	9926	H. sapiens	LPGAT1	lysophosphatidylglycerol acyltransferase 1	GO:0036149 phosphatidylinositol acyl-chain remodeling;GO:0036148 phosphatidylglycerol acyl-chain remodeling;GO:0019432 triglyceride biosynthetic process		Enzymes; ENZYME proteins:Transferases					1.0
Q99988	9518	uniprot	H. sapiens	9518	H. sapiens	GDF15	growth differentiation factor 15	GO:0060400 negative regulation of growth hormone receptor signaling pathway;GO:0060398 regulation of growth hormone receptor signaling pathway;GO:0002023 reduction of food intake in response to dietary excess		Predicted secreted proteins; Predicted intracellular proteins; Disease related genes; Cancer-related genes:Candidate cancer biomarkers	Golgi apparatus (Enhanced)		(M256)PID TAP63 PATHWAY; (M19)PID P73PATHWAY; (M145)PID P53 DOWNSTREAM PATHWAY		0.0
Q9BU23-2						None	None	None	None	None	None	None	None	None	nan
Q9BVQ7	79029	uniprot	H. sapiens	79029	H. sapiens	SPATA5L1	spermatogenesis associated 5 like 1			Predicted intracellular proteins	Nucleoplasm (Approved); Additional: Nucleoli				0.0
Q9H7Z7	80142	uniprot	H. sapiens	80142	H. sapiens	PTGES2	prostaglandin E synthase 2	GO:0019371 cyclooxygenase pathway;GO:0001516 prostaglandin biosynthetic process;GO:0046457 prostanoid biosynthetic process		Enzymes; ENZYME proteins:Isomerase; Human disease related genes:Cancers:Cancers of male genital organs; Predicted intracellular proteins	Mitochondria (Approved)		(M161)PID IFNG PATHWAY		1.0
Q9HC03						None	None	None	None	None	None	None	None	None	nan
Q9HD33-2						None	None	None	None	None	None	None	None	None	nan
Q9NZM1-6						None	None	None	None	None	None	None	None	None	nan
X5D2J9	2969	uniprot	H. sapiens	2969	H. sapiens	GTF2I	general transcription factor IIi	GO:0100026 positive regulation of DNA repair by transcription from RNA polymerase II promoter;GO:0016525 negative regulation of angiogenesis;GO:2000181 negative regulation of blood vessel morphogenesis		Human disease related genes:Other congenital disorders:Chromosomal abnormalities; Predicted intracellular proteins; Disease related genes	Nucleoplasm (Enhanced)				0.0

## Sheet: Enrichment
GroupID	Category	Term	Description	LogP	Log(q-value)	InTerm_InList	Genes	Symbols
1_Summary	GO Biological Processes	GO:0008610	lipid biosynthetic process	-2.68143	0	3/570	8394,9926,80142	PIP5K1A,LPGAT1,PTGES2
1_Member	GO Biological Processes	GO:0008610	lipid biosynthetic process	-2.68143	0	3/570	8394,9926,80142	PIP5K1A,LPGAT1,PTGES2
1_Member	Reactome Gene Sets	R-HSA-556833	Metabolism of lipids	-2.35781	0	3/742	8394,9926,80142	PIP5K1A,LPGAT1,PTGES2
