# Supplementary material for: The acetylase activity of Cdu1 regulates bacterial exit from infected cells by protecting Chlamydia effectors from degradation
Source: eLife journal article supplement (doi:10.7554/elife.87386), 2023-05-12
Supplement: fig3-figsupp1-data1 [file 05_CTL0480 localization quantification_Hela_36 hpi_R2.xlsx]

## Sheet: L2 434 Bu 36 hpi_R2
Strain	Time point	Replicate
L2 pBOMB	36 hpi	2
Field	Inclusions with CTL0480	Inclusions w/o CTL0480
1	1
	2
	3
	4
	5
	6
	7
	8
	9
Field	Inclusions with CTL0480	Inclusions w/o CTL0480
2	1
	2
	3
	4
Field	Inclusions with CTL0480	Inclusions w/o CTL0480
3	1
	2
	3
	4
Field	Inclusions with CTL0480	Inclusions w/o CTL0480
4	1
	2
	3
	4
Field	Inclusions with CTL0480	Inclusions w/o CTL0480
5	1
	2
	3
	4
	5
Field	Inclusions with CTL0480	Inclusions w/o CTL0480
6	1
	2
	3
	4
	5
	6
	7
Field	Inclusions with CTL0480	Inclusions w/o CTL0480
7	1
	2
	3
	4
	5
	6
Field	Inclusions with CTL0480	Inclusions w/o CTL0480
8	1
	2
	3
	4
	5
	6
	7
	8
Field	Inclusions with CTL0480	Inclusions w/o CTL0480
9	1
	2
	3
	4
	5
	6
Field	Inclusions with CTL0480	Inclusions w/o CTL0480
10	1
	2
	3
	4
	5
	6
	7
	8

## Sheet: cdu1 aadA 36 hpi_R2
Strain	Time point	Replicate
cdu1 aadA pBOMB	36 hpi	2
Field	Inclusions with CTL0480	Inclusions w/o CTL0480
1	1	2
	3	5
	4	6
	7
Field	Inclusions with CTL0480	Inclusions w/o CTL0480
2	5	1
	6	2
	7	3
		4
		8
Field	Inclusions with CTL0480	Inclusions w/o CTL0480
3	10	1
		2
		3
		4
		5
		6
		7
		8
		9
Field	Inclusions with CTL0480	Inclusions w/o CTL0480
4	2	1
	3
	4
Field	Inclusions with CTL0480	Inclusions w/o CTL0480
5	1	2
	3
	4
Field	Inclusions with CTL0480	Inclusions w/o CTL0480
6	1	4
	2	5
	3	6
	9	7
	11	8
	12	10
		13
		14
		15
Field	Inclusions with CTL0480	Inclusions w/o CTL0480
7	4	1
	10	2
	11	3
	12	5
		6
		7
		8
		9
		13
Field	Inclusions with CTL0480	Inclusions w/o CTL0480
8	7	1
		2
		3
		4
		5
		6
Field	Inclusions with CTL0480	Inclusions w/o CTL0480
9	1	2
	3	4
	5	6
	7
Field	Inclusions with CTL0480	Inclusions w/o CTL0480
10	2	1
	3	4
	6	5
	7	8
		9

## Sheet: ctl0480 aadA 36 hpi_R2
Strain	Time point	Replicate
ctl0480 aadA	36 hpi	2
Field	Inclusions with CTL0480	Inclusions w/o CTL0480
1		1
		2
		3
		4
		5
		6
Field	Inclusions with CTL0480	Inclusions w/o CTL0480
2		1
		2
		3
		4
		5
		6
		7
Field	Inclusions with CTL0480	Inclusions w/o CTL0480
3		1
		2
		3
		4
Field	Inclusions with CTL0480	Inclusions w/o CTL0480
4		1
		2
		3
		4
Field	Inclusions with CTL0480	Inclusions w/o CTL0480
5		1
		2
		3
		4
Field	Inclusions with CTL0480	Inclusions w/o CTL0480
6		1
		2
		3
		4
		5
		6
Field	Inclusions with CTL0480	Inclusions w/o CTL0480
7		1
		2
		3
		4
		5
		6
		7
Field	Inclusions with CTL0480	Inclusions w/o CTL0480
8		1
		2
		3
		4
		5
		6
		7
		8
Field	Inclusions with CTL0480	Inclusions w/o CTL0480
9		1
		2
		3
		4
		5
		6
		7
		8
Field	Inclusions with CTL0480	Inclusions w/o CTL0480
10		1
		2
		3
		4
		5
		6
		7
		8
		9
		10
		11
		12
