# Supplementary material for: The acetylase activity of Cdu1 regulates bacterial exit from infected cells by protecting Chlamydia effectors from degradation
Source: eLife journal article supplement (doi:10.7554/elife.87386), 2023-05-12
Supplement: fig3-figsupp1-data1 [file 09_CTL0480 localization quantification_Hela_48 hpi_R3.xlsx]

## Sheet: L2 434 Bu 48 hpi_R3
Strain	Time point	Replicate
l2 434 Bu	48 hpi	3
Field	Inclusions with CTL0480	Inclusions w/o CTL0480
1	1	3
	2
Field	Inclusions with CTL0480	Inclusions w/o CTL0480
2	1
	2
	3
	4
	5
	6
	7
	8
Field	Inclusions with CTL0480	Inclusions w/o CTL0480
3	1
	2
	3
Field	Inclusions with CTL0480	Inclusions w/o CTL0480
4	1	5
	2
	3
	4
Field	Inclusions with CTL0480	Inclusions w/o CTL0480
5	1
	2
	3
	4
	5
Field	Inclusions with CTL0480	Inclusions w/o CTL0480
6	1
	2
	3
	4
Field	Inclusions with CTL0480	Inclusions w/o CTL0480
7	1
	2
	3
	4
Field	Inclusions with CTL0480	Inclusions w/o CTL0480
8	1	5
	2	6
	3	7
	4
Field	Inclusions with CTL0480	Inclusions w/o CTL0480
9	1
	2
	3
	4
	5
	6
	7
Field	Inclusions with CTL0480	Inclusions w/o CTL0480
10	1
	2
	3
	4

## Sheet: cdu1 aadA 48 hpi_R3
Strain	Time point	Replicate
cdu1 aadA pBOMB	48 hpi	3
Field	Inclusions with CTL0480	Inclusions w/o CTL0480
1		1
		2
		3
		4
		5
Field	Inclusions with CTL0480	Inclusions w/o CTL0480
2		1
		2
		3
		4
		5
Field	Inclusions with CTL0480	Inclusions w/o CTL0480
3		1
		2
		3
		4
		5
		6
Field	Inclusions with CTL0480	Inclusions w/o CTL0480
4		1
		2
		3
		4
		5
		6
Field	Inclusions with CTL0480	Inclusions w/o CTL0480
5		1
		2
		3
		4
		5
		6
Field	Inclusions with CTL0480	Inclusions w/o CTL0480
6		1
		2
		3
		4
		5
		6
		7
Field	Inclusions with CTL0480	Inclusions w/o CTL0480
7		1
		2
		3
		4
		5
		6
Field	Inclusions with CTL0480	Inclusions w/o CTL0480
8		1
		2
		3
		4
Field	Inclusions with CTL0480	Inclusions w/o CTL0480
9		1
		2
		3
		4
		5
Field	Inclusions with CTL0480	Inclusions w/o CTL0480
10		1
		2
		3
		4
		5

## Sheet: ctl0480 aadA 48 hpi_R3
Strain	Time point	Replicate
ctl0480 aadA	48 hpi	3
Field	Inclusions with CTL0480	Inclusions w/o CTL0480
1		1
		2
		3
		4
		5
		6
		7
Field	Inclusions with CTL0480	Inclusions w/o CTL0480
2		1
		2
		3
		4
		5
Field	Inclusions with CTL0480	Inclusions w/o CTL0480
3		1
		2
		3
		4
Field	Inclusions with CTL0480	Inclusions w/o CTL0480
4		1
		2
		3
		4
Field	Inclusions with CTL0480	Inclusions w/o CTL0480
5		1
		2
		3
		4
		5
		6
		7
Field	Inclusions with CTL0480	Inclusions w/o CTL0480
6		1
		2
		3
		4
		5
Field	Inclusions with CTL0480	Inclusions w/o CTL0480
7		1
		2
		3
		4
Field	Inclusions with CTL0480	Inclusions w/o CTL0480
8		1
		2
		3
		4
		5
		6
		7
Field	Inclusions with CTL0480	Inclusions w/o CTL0480
9		1
		2
		3
		4
		5
		6
Field	Inclusions with CTL0480	Inclusions w/o CTL0480
10		1
		2
		3
		4
