# Supplementary material for: The acetylase activity of Cdu1 regulates bacterial exit from infected cells by protecting Chlamydia effectors from degradation
Source: eLife journal article supplement (doi:10.7554/elife.87386), 2023-05-12
Supplement: fig5-data4 [file Figure 5-source data 4.xlsx]

## Sheet: infections setup
RPT2 - burden (new split); RPT1 IF WT A549 (RNF213 and linUb); RPT2 IF RNF213 KOs (linUb)
6.10.23
3pm	plate new split of A549 cells for burden (panel 1) and IF (WT - RNF213 and linUb; KOs for LinUb)
cell	count	96 (mL)	120k/
WT	91	2.8 (42)	132
po2	122	1.33 (27)	98
po3	96	--	125
6.11.23
4pm	prime (10U/mL and 100U/mL) burden plate
6.12.23
cells per well	200000		strain	IFU/µL	"re-adjust"	#wells	prep mL	total IFUs	vol (uL)
MOI	2		L2 WT seed	40400000	4040000	4	6	4800000	1.18812
wells	12		garD no GFP	935759	935759	--	6	4800000	5.12953
volume per well (mL)	0.5		cdu1::GII pBOMB	6200000	6200000	12	8	6400000	1.03226
prep each (mL)	var
IFU/mL	800000
total IFU	see table		L2 WT (Coers - Rob)	600000	600000	4	6	4800000	8
			CT-gfp	3.42725e+06	3.42725e+06	--	6	4800000	1.40054
spin @	12pm 6/12/23
ifn-g @	3:15pm 6/13/23
fix @	12:15p.m. 6/13/23
IF RNF213 RPT2 + 3 - performed by RD (see sheets)

## Sheet: ImageJ blind keys
RNF213 RPT1 (new split)
encrypted name	de-crypted name
File_49ae9fde_97fa_45e5_8465_6ca944470d7c.czi	Cdu1-newsplit_WTA549_rnf213_rpt1_D-minus-6.czi
File_41e596fa_d8e4_4239_868e_a114fa6c123f.czi	Cdu1-newsplit_WTA549_rnf213_rpt1_A-plus-1.czi
File_53320b3e_4220_4155_a670_bb1978981f5f.czi	Cdu1-newsplit_WTA549_rnf213_rpt1_C-plus-1.czi
File_1c56524c_59f6_47ef_bf7c_6b744f60171f.czi	Cdu1-newsplit_WTA549_rnf213_rpt1_D-plus-4.czi
File_23985b48_cb0f_4cdb_9896_e50bd370b17f.czi	Cdu1-newsplit_WTA549_rnf213_rpt1_D-plus-3.czi
File_a64005e4_f423_45c6_b2a4_de2d12c72c7a.czi	Cdu1-newsplit_WTA549_rnf213_rpt1_D-minus-1.czi
File_14e404e8_5862_471a_8b20_6b27663b5992.czi	Cdu1-newsplit_WTA549_rnf213_rpt1_C-plus-4.czi
File_4f5a6a1f_6418_4470_9581_9bb5f30f7a4b.czi	Cdu1-newsplit_WTA549_rnf213_rpt1_D-plus-2.czi
File_09ca9598_b1bd_4a7a_b27d_2c402f92b554.czi	Cdu1-newsplit_WTA549_rnf213_rpt1_C-minus-4.czi
File_ae203614_38d6_4635_a2fa_888ec21c1958.czi	Cdu1-newsplit_WTA549_rnf213_rpt1_D-plus-5.czi
File_2b66f405_f25c_4718_8bb9_1b15d872abed.czi	Cdu1-newsplit_WTA549_rnf213_rpt1_B-minus-1.czi
File_59d91e83_bff2_4763_a754_f901f692a2c5.czi	Cdu1-newsplit_WTA549_rnf213_rpt1_D-minus-3.czi
File_2f9b1ceb_baa8_4bf0_ab4d_d130710863fb.czi	Cdu1-newsplit_WTA549_rnf213_rpt1_A-minus-6.czi
File_2ba231bd_d8e4_4ae2_bd9b_49024a1da4d8.czi	Cdu1-newsplit_WTA549_rnf213_rpt1_C-minus-5.czi
File_c0997291_3854_48c5_8907_bcb6efe297bf.czi	Cdu1-newsplit_WTA549_rnf213_rpt1_B-plus-2.czi
File_7943defc_9bd4_442b_9cde_d5d5ec47c077.czi	Cdu1-newsplit_WTA549_rnf213_rpt1_B-minus-3.czi
File_880bc36e_4644_479f_a05b_50df350160ab.czi	Cdu1-newsplit_WTA549_rnf213_rpt1_D-minus-2.czi
File_9e4ddea4_a14f_459f_b3f5_a38c0c49a641.czi	Cdu1-newsplit_WTA549_rnf213_rpt1_B-plus-1.czi
File_34a4a70a_612a_4c25_80dd_99035cb5b312.czi	Cdu1-newsplit_WTA549_rnf213_rpt1_A-minus-1.czi
File_ecb28f14_df54_43ce_aa16_5d206974e2b2.czi	Cdu1-newsplit_WTA549_rnf213_rpt1_C-minus-6.czi
File_a43cb0b8_9f25_426d_a50d_93941ea7106d.czi	Cdu1-newsplit_WTA549_rnf213_rpt1_B-plus-4.czi
File_1b7a44ac_fceb_41c3_aee8_12d110e40b32.czi	Cdu1-newsplit_WTA549_rnf213_rpt1_A-minus-3.czi
File_6ad6f3a0_5bba_4d32_9ec8_cec0ae8669e8.czi	Cdu1-newsplit_WTA549_rnf213_rpt1_C-minus-3.czi
File_abc6d87e_1a94_40f8_820f_20c4a8b12b73.czi	Cdu1-newsplit_WTA549_rnf213_rpt1_D-plus-1.czi
File_7df66842_ea7f_4fd4_8975_e09b61a847e6.czi	Cdu1-newsplit_WTA549_rnf213_rpt1_B-plus-5.czi
File_c2edbc04_2e4d_46c4_8805_3378f038c753.czi	Cdu1-newsplit_WTA549_rnf213_rpt1_A-plus-3.czi
File_e6687018_9f01_43c3_8ca3_912cb8514623.czi	Cdu1-newsplit_WTA549_rnf213_rpt1_C-plus-6.czi
File_96877c2b_cf68_46d8_b612_44c8889d1d5b.czi	Cdu1-newsplit_WTA549_rnf213_rpt1_A-plus-4.czi
File_038d84be_ba35_4618_933f_836f86792124.czi	Cdu1-newsplit_WTA549_rnf213_rpt1_B-plus-3.czi
File_24e63e1d_869e_4216_a5d6_319a7984ff92.czi	Cdu1-newsplit_WTA549_rnf213_rpt1_C-minus-2.czi
File_e4923f6c_8fe4_4773_a181_afaeb3da02d9.czi	Cdu1-newsplit_WTA549_rnf213_rpt1_C-plus-2.czi
File_85a9bfa7_5972_4c88_b46c_7a1aeacb6ace.czi	Cdu1-newsplit_WTA549_rnf213_rpt1_C-plus-5.czi
File_ebe88b74_7dd3_4840_ba11_db020b6601f3.czi	Cdu1-newsplit_WTA549_rnf213_rpt1_B-plus-6.czi
File_bf50f4c7_0117_47d8_bfcb_4551ee666da9.czi	Cdu1-newsplit_WTA549_rnf213_rpt1_A-plus-5.czi
File_da41a6ce_824c_4d2a_a227_92161bc70183.czi	Cdu1-newsplit_WTA549_rnf213_rpt1_B-minus-2.czi
File_9689e48b_c257_4df8_82dd_930e224a09f8.czi	Cdu1-newsplit_WTA549_rnf213_rpt1_D-minus-4.czi
File_e455b385_a9c8_4266_854f_eb51ec5f3185.czi	Cdu1-newsplit_WTA549_rnf213_rpt1_A-minus-5.czi
File_164d2cc2_1533_49ff_96a2_73b857a93338.czi	Cdu1-newsplit_WTA549_rnf213_rpt1_A-plus-6.czi
File_1ed8df95_9b59_466b_b1a8_aa0a1fca3510.czi	Cdu1-newsplit_WTA549_rnf213_rpt1_C-minus-1.czi
File_a82f4720_b8f2_4f26_8bb9_f222b2369d0b.czi	Cdu1-newsplit_WTA549_rnf213_rpt1_A-minus-2.czi
File_7153b09d_990c_47ec_9dca_404cdb938edf.czi	Cdu1-newsplit_WTA549_rnf213_rpt1_B-minus-4.czi
File_14922905_cf10_4490_89e2_9c9dad68639a.czi	Cdu1-newsplit_WTA549_rnf213_rpt1_D-plus-6.czi
File_cb4a945a_9ad0_4329_8473_f07f2485560a.czi	Cdu1-newsplit_WTA549_rnf213_rpt1_B-minus-6.czi
File_2af0f152_a7ee_4261_ad7a_23ff33243529.czi	Cdu1-newsplit_WTA549_rnf213_rpt1_C-plus-3.czi
File_27fe00ba_c9f2_41f5_8322_092fc9949cc2.czi	Cdu1-newsplit_WTA549_rnf213_rpt1_B-minus-5.czi
File_4b8845ea_9f8a_4b82_9a2c_2b791383dfb7.czi	Cdu1-newsplit_WTA549_rnf213_rpt1_A-minus-4.czi
File_6978979b_3fc2_4e53_a145_de9582e2abf6.czi	Cdu1-newsplit_WTA549_rnf213_rpt1_A-plus-2.czi
File_9a7d6dbd_992b_4232_a011_7cac79de10e7.czi	Cdu1-newsplit_WTA549_rnf213_rpt1_D-minus-5.czi

## Sheet: targeting definition note 
RNF213
>50% around inclusion "ring"

## Sheet: tape blinding
Cdu1 new split WT A549 --> RNF213/M1-Ub RPTs 1
blinded by:	Stephen
date:	6.14.23
unmasked:	6.14.23
slide	chlam
A	Cdu1-FLAG
B	Cdu1
C	garD
D	L2-Val

## Sheet: RNF213 RPT1 (new split) - 6.24
encrypted name	incA	RNF213+	de-crypted file
File_34a4a70a_612a_4c25_80dd_99035cb5b312.czi	36	0	Cdu1-newsplit_WTA549_rnf213_rpt1_A-minus-1.czi					Tape Sample	sample	Fov	incA	total incA	RNF213+	%RNF213+
File_a82f4720_b8f2_4f26_8bb9_f222b2369d0b.czi	15	0	Cdu1-newsplit_WTA549_rnf213_rpt1_A-minus-2.czi					D	L2 WT (Val)-minus	1	40	330	0	0
File_1b7a44ac_fceb_41c3_aee8_12d110e40b32.czi	45	0	Cdu1-newsplit_WTA549_rnf213_rpt1_A-minus-3.czi							2	70		0
File_4b8845ea_9f8a_4b82_9a2c_2b791383dfb7.czi	62	1	Cdu1-newsplit_WTA549_rnf213_rpt1_A-minus-4.czi							3	69		0
File_e455b385_a9c8_4266_854f_eb51ec5f3185.czi	42	2	Cdu1-newsplit_WTA549_rnf213_rpt1_A-minus-5.czi							4	72		0
File_2f9b1ceb_baa8_4bf0_ab4d_d130710863fb.czi	45	0	Cdu1-newsplit_WTA549_rnf213_rpt1_A-minus-6.czi							5	38		0
File_41e596fa_d8e4_4239_868e_a114fa6c123f.czi	34	1	Cdu1-newsplit_WTA549_rnf213_rpt1_A-plus-1.czi							6	41		0
File_6978979b_3fc2_4e53_a145_de9582e2abf6.czi	54	0	Cdu1-newsplit_WTA549_rnf213_rpt1_A-plus-2.czi					D	L2 WT (Val)-plus	1	32	316	0	1.89873
File_c2edbc04_2e4d_46c4_8805_3378f038c753.czi	51	2	Cdu1-newsplit_WTA549_rnf213_rpt1_A-plus-3.czi							2	46		0
File_96877c2b_cf68_46d8_b612_44c8889d1d5b.czi	48	2	Cdu1-newsplit_WTA549_rnf213_rpt1_A-plus-4.czi							3	74		2
File_bf50f4c7_0117_47d8_bfcb_4551ee666da9.czi	38	0	Cdu1-newsplit_WTA549_rnf213_rpt1_A-plus-5.czi							4	69		1
File_164d2cc2_1533_49ff_96a2_73b857a93338.czi	47	0	Cdu1-newsplit_WTA549_rnf213_rpt1_A-plus-6.czi							5	50		0
File_2b66f405_f25c_4718_8bb9_1b15d872abed.czi	38	1	Cdu1-newsplit_WTA549_rnf213_rpt1_B-minus-1.czi							6	45		3
File_da41a6ce_824c_4d2a_a227_92161bc70183.czi	46	0	Cdu1-newsplit_WTA549_rnf213_rpt1_B-minus-2.czi					C	garD-minus	1	57	319	26	40.7524
File_7943defc_9bd4_442b_9cde_d5d5ec47c077.czi	49	0	Cdu1-newsplit_WTA549_rnf213_rpt1_B-minus-3.czi							2	69		25
File_7153b09d_990c_47ec_9dca_404cdb938edf.czi	18	0	Cdu1-newsplit_WTA549_rnf213_rpt1_B-minus-4.czi							3	37		8
File_27fe00ba_c9f2_41f5_8322_092fc9949cc2.czi	32	0	Cdu1-newsplit_WTA549_rnf213_rpt1_B-minus-5.czi							4	45		21
File_cb4a945a_9ad0_4329_8473_f07f2485560a.czi	37	0	Cdu1-newsplit_WTA549_rnf213_rpt1_B-minus-6.czi							5	64		32
File_9e4ddea4_a14f_459f_b3f5_a38c0c49a641.czi	40	1	Cdu1-newsplit_WTA549_rnf213_rpt1_B-plus-1.czi							6	47		18
File_c0997291_3854_48c5_8907_bcb6efe297bf.czi	45	4	Cdu1-newsplit_WTA549_rnf213_rpt1_B-plus-2.czi					C	garD-plus	1	18	161	16	82.6087
File_038d84be_ba35_4618_933f_836f86792124.czi	24	0	Cdu1-newsplit_WTA549_rnf213_rpt1_B-plus-3.czi							2	28		23
File_a43cb0b8_9f25_426d_a50d_93941ea7106d.czi	47	2	Cdu1-newsplit_WTA549_rnf213_rpt1_B-plus-4.czi							3	32		30
File_7df66842_ea7f_4fd4_8975_e09b61a847e6.czi	30	1	Cdu1-newsplit_WTA549_rnf213_rpt1_B-plus-5.czi							4	28		19
File_ebe88b74_7dd3_4840_ba11_db020b6601f3.czi	31	2	Cdu1-newsplit_WTA549_rnf213_rpt1_B-plus-6.czi							5	32		27
File_1ed8df95_9b59_466b_b1a8_aa0a1fca3510.czi	57	26	Cdu1-newsplit_WTA549_rnf213_rpt1_C-minus-1.czi							6	23		18
File_24e63e1d_869e_4216_a5d6_319a7984ff92.czi	69	25	Cdu1-newsplit_WTA549_rnf213_rpt1_C-minus-2.czi					B	Cdu1-minus	1	38	220	1	0.454545
File_6ad6f3a0_5bba_4d32_9ec8_cec0ae8669e8.czi	37	8	Cdu1-newsplit_WTA549_rnf213_rpt1_C-minus-3.czi							2	46		0
File_09ca9598_b1bd_4a7a_b27d_2c402f92b554.czi	45	21	Cdu1-newsplit_WTA549_rnf213_rpt1_C-minus-4.czi							3	49		0
File_2ba231bd_d8e4_4ae2_bd9b_49024a1da4d8.czi	64	32	Cdu1-newsplit_WTA549_rnf213_rpt1_C-minus-5.czi							4	18		0
File_ecb28f14_df54_43ce_aa16_5d206974e2b2.czi	47	18	Cdu1-newsplit_WTA549_rnf213_rpt1_C-minus-6.czi							5	32		0
File_53320b3e_4220_4155_a670_bb1978981f5f.czi	18	16	Cdu1-newsplit_WTA549_rnf213_rpt1_C-plus-1.czi							6	37		0
File_e4923f6c_8fe4_4773_a181_afaeb3da02d9.czi	28	23	Cdu1-newsplit_WTA549_rnf213_rpt1_C-plus-2.czi					B	Cdu1-plus	1	40	217	1	4.60829
File_2af0f152_a7ee_4261_ad7a_23ff33243529.czi	32	30	Cdu1-newsplit_WTA549_rnf213_rpt1_C-plus-3.czi							2	45		4
File_14e404e8_5862_471a_8b20_6b27663b5992.czi	28	19	Cdu1-newsplit_WTA549_rnf213_rpt1_C-plus-4.czi							3	24		0
File_85a9bfa7_5972_4c88_b46c_7a1aeacb6ace.czi	32	27	Cdu1-newsplit_WTA549_rnf213_rpt1_C-plus-5.czi							4	47		2
File_e6687018_9f01_43c3_8ca3_912cb8514623.czi	23	18	Cdu1-newsplit_WTA549_rnf213_rpt1_C-plus-6.czi							5	30		1
File_a64005e4_f423_45c6_b2a4_de2d12c72c7a.czi	40	0	Cdu1-newsplit_WTA549_rnf213_rpt1_D-minus-1.czi							6	31		2
File_880bc36e_4644_479f_a05b_50df350160ab.czi	70	0	Cdu1-newsplit_WTA549_rnf213_rpt1_D-minus-2.czi					A	Cdu1-FLAG-minus	1	36	245	0	1.22449
File_59d91e83_bff2_4763_a754_f901f692a2c5.czi	69	0	Cdu1-newsplit_WTA549_rnf213_rpt1_D-minus-3.czi							2	15		0
File_9689e48b_c257_4df8_82dd_930e224a09f8.czi	72	0	Cdu1-newsplit_WTA549_rnf213_rpt1_D-minus-4.czi							3	45		0
File_9a7d6dbd_992b_4232_a011_7cac79de10e7.czi	38	0	Cdu1-newsplit_WTA549_rnf213_rpt1_D-minus-5.czi							4	62		1
File_49ae9fde_97fa_45e5_8465_6ca944470d7c.czi	41	0	Cdu1-newsplit_WTA549_rnf213_rpt1_D-minus-6.czi							5	42		2
File_abc6d87e_1a94_40f8_820f_20c4a8b12b73.czi	32	0	Cdu1-newsplit_WTA549_rnf213_rpt1_D-plus-1.czi							6	45		0
File_4f5a6a1f_6418_4470_9581_9bb5f30f7a4b.czi	46	0	Cdu1-newsplit_WTA549_rnf213_rpt1_D-plus-2.czi					A	Cdu1-FLAG-plus	1	34	272	1	1.83824
File_23985b48_cb0f_4cdb_9896_e50bd370b17f.czi	74	2	Cdu1-newsplit_WTA549_rnf213_rpt1_D-plus-3.czi							2	54		0
File_1c56524c_59f6_47ef_bf7c_6b744f60171f.czi	69	1	Cdu1-newsplit_WTA549_rnf213_rpt1_D-plus-4.czi							3	51		2
File_ae203614_38d6_4635_a2fa_888ec21c1958.czi	50	0	Cdu1-newsplit_WTA549_rnf213_rpt1_D-plus-5.czi							4	48		2
File_14922905_cf10_4490_89e2_9c9dad68639a.czi	45	3	Cdu1-newsplit_WTA549_rnf213_rpt1_D-plus-6.czi							5	38		0
										6	47		0

## Sheet: RNF213 RPT2 (RD) Targeting__7_4
OriginalName	Chlam	RNF
GarD_A549_IncA_RNF213-02.czi	33	9		L2WT_A549_IncA_RNF213-01.czi	8	0		Cdu1_A549_IncA_RNF213-01.czi	12	0
GarD_A549_IncA_RNF213-03.czi	24	8		L2WT_A549_IncA_RNF213-02.czi	7	0		Cdu1_A549_IncA_RNF213-02.czi	22	0
GarD_A549_IncA_RNF213-04.czi	38	10		L2WT_A549_IncA_RNF213-03.czi	8	0		Cdu1_A549_IncA_RNF213-03.czi	24	0
GarD_A549_IncA_RNF213-05.czi	33	17		L2WT_A549_IncA_RNF213-04.czi	9	0		Cdu1_A549_IncA_RNF213-04.czi	5	1
GarD_A549_IncA_RNF213-06.czi	36	11		L2WT_A549_IncA_RNF213-05.czi	10	0		Cdu1_A549_IncA_RNF213-05.czi	8	0
GarD_A549_IncA_RNF213-07.czi	44	11		L2WT_A549_IncA_RNF213-06.czi	8	0		Cdu1_A549_IncA_RNF213-06.czi	11	0
GarD_A549_IncA_RNF213-08.czi	54	23		L2WT_A549_IncA_RNF213-07.czi	11	0		Cdu1_A549_IncA_RNF213-07.czi	9	0
GarD_A549_IncA_RNF213-09.czi	39	18		L2WT_A549_IncA_RNF213-08.czi	13	0		Cdu1_A549_IncA_RNF213-08.czi	19	0
GarD_A549_IncA_RNF213-10.czi	22	6		L2WT_A549_IncA_RNF213-gamma-01.czi	3	0		Cdu1_A549_IncA_RNF213-gamma-01.czi	16	1
GarD_A549_IncA_RNF213-gamma-01.czi	28	17		L2WT_A549_IncA_RNF213-gamma-02.czi	4	0		Cdu1_A549_IncA_RNF213-gamma-02.czi	11	0
GarD_A549_IncA_RNF213-gamma-02.czi	29	26		L2WT_A549_IncA_RNF213-gamma-03.czi	9	0		Cdu1_A549_IncA_RNF213-gamma-03.czi	31	1
GarD_A549_IncA_RNF213-gamma-03.czi	39	33		L2WT_A549_IncA_RNF213-gamma-04.czi	10	0		Cdu1_A549_IncA_RNF213-gamma-04.czi	33	1
GarD_A549_IncA_RNF213-gamma-04.czi	15	14		L2WT_A549_IncA_RNF213-gamma-05.czi	10	0		Cdu1_A549_IncA_RNF213-gamma-05.czi	23	0
GarD_A549_IncA_RNF213-gamma-05.czi	13	11		L2WT_A549_IncA_RNF213-gamma-06.czi	15	0		Cdu1_A549_IncA_RNF213-gamma-06.czi	23	2
GarD_A549_IncA_RNF213-gamma-06.czi	26	19		L2WT_A549_IncA_RNF213-gamma-07.czi	11	0		Cdu1_A549_IncA_RNF213-gamma-07.czi	21	0
GarD_A549_IncA_RNF213-gamma-07.czi	25	23		L2WT_A549_IncA_RNF213-gamma-08.czi	12	0		Cdu1_A549_IncA_RNF213-gamma-08.czi	24	1
GarD_A549_IncA_RNF213-gamma-08.czi	29	22						Cdu1_A549_IncA_RNF213-gamma-09.czi	23	1
	323	113	34.9845		74	0	0		110	1	0.909091
	204	165	80.8824		74	0	0		205	7	3.41463

## Sheet: RNF213 RPT3 (RD)_targeting_7-18
OriginalName	inCdu1s	RNF213	OriginalName	inCdu1s	RNF213	OriginalName	inCdu1s	RNF213	OriginalName	inCdu1s	RNF213	OriginalName	inCdu1s	RNF213	OriginalName	inCdu1s	RNF213
L2_WT-01	6	0	GarD-wt-01	19	5	Cdu1-WT-01	42		A-rnf213ko2-01	6	0	GarD-RNF213KO-01	33	0	Cdu1-RNF213ko-01	62	0
L2_WT-02	6	0	GarD-wt-02	14	6	Cdu1-WT-02	61	0	A-rnf213ko2-02	11	0	GarD-RNF213KO-02	33	0	Cdu1-RNF213ko-02	60	0
L2_WT-03	5	0	GarD-wt-03	29	8	Cdu1-WT-03	53	0	A-rnf213ko2-03	12	1	GarD-RNF213KO-03	30	0	Cdu1-RNF213ko-03	65	0
L2_WT-04	11	0	GarD-wt-04	23	8	Cdu1-WT-04	28	0	A-rnf213ko2-04	6	0	GarD-RNF213KO-04	11	0	Cdu1-RNF213ko-04	67	0
L2_WT-05	5	0	GarD-wt-05	20	8	Cdu1-WT-05	46	0	A-rnf213ko2-05	7	0	GarD-RNF213KO-05	28	0	Cdu1-RNF213ko-05	57	0
L2_WT-06	11	0	GarD-wt-06	29	9	Cdu1-WT-06	38	0	A-rnf213ko2-06	13	0	GarD-RNF213KO-06	22	0	Cdu1-RNF213ko-06	54	0
L2_WT-07	6	0	GarD-wt-07	24	9	Cdu1-WT-07	32	0	A-rnf213ko2-07	7	0	GarD-RNF213KO-07	22	0	Cdu1-RNF213ko-07	49	1
L2_WT-08	8	0	GarD-wt-08	11	5	Cdu1-WT-08	27	0	A-rnf213ko2-08	7	0	GarD-RNF213KO-08	27	2	Cdu1-RNF213ko-08	53	0
L2_WT-gamma-01	10	0	GarD-wt-gamma-02	16	13	Cdu1-WT-09	29	0	A-rnf213ko2-gamma-01	23	0	GarD-RNF213KO-gamma-01	26	0	Cdu1-RNF213ko-09	39	0
L2_WT-gamma-02	19	0	GarD-wt-gamma-03	12	10	Cdu1-WT-gamma-01	26	0	A-rnf213ko2-gamma-02	18	0	GarD-RNF213KO-gamma-02	33	0	Cdu1-RNF213ko-gamma-01	51	0
L2_WT-gamma-03	15	0	GarD-wt-gamma-04	17	14	Cdu1-WT-gamma-02	19	0	A-rnf213ko2-gamma-03	13	0	GarD-RNF213KO-gamma-03	32	0	Cdu1-RNF213ko-gamma-02	54	0
L2_WT-gamma-04	11	0	GarD-wt-gamma-05	15	14	Cdu1-WT-gamma-03	27	0	A-rnf213ko2-gamma-04	18	0	GarD-RNF213KO-gamma-04	23	0	Cdu1-RNF213ko-gamma-03	64	0
L2_WT-gamma-05	8	0	GarD-wt-gamma-06	16	12	Cdu1-WT-gamma-04	39	0	A-rnf213ko2-gamma-05	18	0	GarD-RNF213KO-gamma-05	25	0	Cdu1-RNF213ko-gamma-04	65	0
L2_WT-gamma-06	10	0	GarD-wt-gamma-07	11	10	Cdu1-WT-gamma-05	41	0	A-rnf213ko2-gamma-06	12	0	GarD-RNF213KO-gamma-06	14	1	Cdu1-RNF213ko-gamma-05	58	0
L2_WT-gamma-07	18	0	GarD-wt-gamma-08	13	6	Cdu1-WT-gamma-06	31	0	A-rnf213ko2-gamma-07	9	0	GarD-RNF213KO-gamma-07	22	0	Cdu1-RNF213ko-gamma-06	37	0
L2_WT-gamma-08	10	1	GarD-wt-gamma-09	14	13	Cdu1-WT-gamma-07	42	0	A-rnf213ko2-gamma-08	17	0	GarD-RNF213KO-gamma-08	30	0	Cdu1-RNF213ko-gamma-07	46	0
						Cdu1-WT-gamma-08	30	1							Cdu1-RNF213ko-gamma-08	52	0
	58	0	0	169	58	34.3195	356	0	0
	101	1	0.990099	114	92	80.7018	284	1	0.352113

## Sheet: prism
		-IFN			+IFN
Protein / Exp	sample	RPT1	RPT2	RPT3	RPT1	RPT2	RPT3
RNF213	L2 WT (val)	0	0	0	1.89873	0	0.990099
	garD	40.7524	34.9845	34.3195	82.6087	80.8824	80.7018
	Cdu1	0.454545	0.909091	0	4.60829	3.41463	0.352113
	Cdu1-FLAG	1.22449	--	--	1.83824	--	--
