# Supplementary material for: The acetylase activity of Cdu1 regulates bacterial exit from infected cells by protecting Chlamydia effectors from degradation
Source: eLife journal article supplement (doi:10.7554/elife.87386), 2023-05-12
Supplement: fig6-data1 [file Figure 6-source data 1.xlsx]

## Sheet: Rif-R
Replicate	Inclusions without Actin	Inclusions with Actin		Replicate	Inclusions without Actin	Inclusions with Actin	Total number of inclusions
1	1	1		1	92	28	120
1	1	1			Inclusions without Actin (%)	Inclusions with Actin (%)
1	1	3			0.766667	0.233333
1	1	3
1	1	4
1	1	4
1	1	4		Replicate	Inclusions without Actin	Inclusions with Actin	Total number of inclusions
1	1	4		2	78	33	111
1	2	4			Inclusions without Actin (%)	Inclusions with Actin (%)
1	2	5			0.702703	0.297297
1	2	5
1	2	5
1	2	6		Replicate	Inclusions without Actin	Inclusions with Actin	Total number of inclusions
1	2	6		3	99	29	128
1	2	6			Inclusions without Actin (%)	Inclusions with Actin (%)
1	2	7			0.773438	0.226562
1	2	7
1	2	8
1	3	8
1	3	9
1	3	9			Inclusions with Actin (%)-R1	Inclusions with Actin (%)-R2	Inclusions with Actin (%)-R3	Average number of inclusions with Actin (%)	Stdv (%)
1	3	10			0.23	0.3	0.23	0.253333	0.0404145
1	3	10
1	3	11
1	3	12
1	3	12
1	4	14
1	4	15
1	4
1	4
1	4
1	5
1	5
1	5
1	5
1	5
1	5
1	5
1	6
1	6
1	6
1	6
1	6
1	6
1	6
1	7
1	7
1	7
1	7
1	7
1	7
1	7
1	7
1	8
1	8
1	8
1	8
1	8
1	8
1	8
1	8
1	9
1	9
1	9
1	9
1	9
1	9
1	9
1	9
1	10
1	10
1	10
1	10
1	10
1	10
1	10
1	10
1	11
1	11
1	11
1	11
1	11
1	11
1	11
1	11
1	12
1	12
1	13
1	13
1	13
1	14
1	16
Replicate	Inclusions without Actin	Inclusions with Actin
2	1	1
2	1	1
2	1	1
2	1	2
2	1	2
2	1	2
2	2	2
2	2	2
2	2	4
2	2	4
2	3	4
2	3	5
2	3	5
2	3	5
2	3	5
2	3	6
2	3	6
2	3	7
2	3	7
2	4	8
2	4	9
2	4	9
2	4	9
2	4	9
2	4	10
2	5	10
2	5	10
2	5	11
2	5	13
2	5	13
2	6	14
2	6	14
2	6	15
2	6
2	6
2	6
2	6
2	7
2	7
2	7
2	7
2	7
2	7
2	7
2	8
2	8
2	8
2	8
2	8
2	8
2	8
2	8
2	9
2	9
2	9
2	9
2	10
2	10
2	10
2	10
2	10
2	11
2	11
2	11
2	11
2	11
2	12
2	12
2	12
2	12
2	12
2	13
2	13
2	13
2	14
2	14
2	14
2	16
Replicate	Inclusions without Actin	Inclusions with Actin
3	1	1
3	1	1
3	1	1
3	1	2
3	1	2
3	1	2
3	1	3
3	2	3
3	2	3
3	2	4
3	2	4
3	2	5
3	2	5
3	2	7
3	3	7
3	3	7
3	3	8
3	3	8
3	3	9
3	3	9
3	3	11
3	4	12
3	4	12
3	4	12
3	4	12
3	4	12
3	4	13
3	4	13
3	4	14
3	5
3	5
3	5
3	5
3	5
3	5
3	5
3	5
3	6
3	6
3	6
3	6
3	6
3	6
3	6
3	6
3	6
3	6
3	7
3	7
3	7
3	7
3	7
3	7
3	7
3	8
3	8
3	8
3	8
3	8
3	8
3	8
3	8
3	9
3	9
3	9
3	9
3	9
3	9
3	9
3	9
3	10
3	10
3	10
3	10
3	10
3	10
3	10
3	10
3	10
3	11
3	11
3	11
3	11
3	11
3	11
3	11
3	11
3	12
3	12
3	12
3	13
3	13
3	13
3	13
3	14
3	14
3	15
3	16
3	17

## Sheet: M407 p2TK2
Replicate (McGonagall)	m	Inclusions with Actin		Replicate	Inclusions without Actin	Inclusions with Actin	Total number of inclusions
1	1	6		1	235	11	246
1	1	10			Inclusions without Actin (%)	Inclusions with Actin (%)
1	1	12			0.955285	0.0447154
1	1	13
1	1	14
1	1	15
1	1	21		Replicate	Inclusions without Actin	Inclusions with Actin	Total number of inclusions
1	1	22		2	273	30	303
1	1	23			Inclusions without Actin (%)	Inclusions with Actin (%)
1	1	23			0.90099	0.0990099
1	2	24
1	2
1	2			Replicate	Inclusions without Actin	Inclusions with Actin	Total number of inclusions
1	2			3	149	10	159
1	2				Inclusions without Actin (%)	Inclusions with Actin (%)
1	2				0.937107	0.0628931
1	2
1	2
1	2
1	2
1	3				Inclusions with Actin (%)-R1	Inclusions with Actin (%)-R2	Inclusions with Actin (%)-R3	Average number of inclusions with Actin (%)	Stdv (%)
1	3				0.04	0.1	0.06	0.0666667	0.0305505
1	3
1	3
1	3
1	3
1	3
1	3
1	3
1	3
1	4
1	4
1	4
1	4
1	4
1	4
1	4
1	4
1	4
1	4
1	5
1	5
1	5
1	5
1	5
1	5
1	5
1	5
1	5
1	5
1	6
1	6
1	6
1	6
1	6
1	6
1	6
1	6
1	6
1	7
1	7
1	7
1	7
1	7
1	7
1	7
1	7
1	7
1	7
1	8
1	8
1	8
1	8
1	8
1	8
1	8
1	8
1	8
1	8
1	9
1	9
1	9
1	9
1	9
1	9
1	9
1	9
1	9
1	9
1	10
1	10
1	10
1	10
1	10
1	10
1	10
1	10
1	10
1	11
1	11
1	11
1	11
1	11
1	11
1	11
1	11
1	11
1	11
1	12
1	12
1	12
1	12
1	12
1	12
1	12
1	12
1	12
1	13
1	13
1	13
1	13
1	13
1	13
1	13
1	13
1	13
1	14
1	14
1	14
1	14
1	14
1	14
1	14
1	14
1	14
1	15
1	15
1	15
1	15
1	15
1	15
1	15
1	15
1	15
1	16
1	16
1	16
1	16
1	16
1	16
1	16
1	16
1	16
1	16
1	17
1	17
1	17
1	17
1	17
1	17
1	17
1	17
1	17
1	17
1	18
1	18
1	18
1	18
1	18
1	18
1	18
1	18
1	18
1	18
1	19
1	19
1	19
1	19
1	19
1	19
1	19
1	19
1	19
1	19
1	20
1	20
1	20
1	20
1	20
1	20
1	20
1	20
1	20
1	20
1	21
1	21
1	21
1	21
1	21
1	21
1	21
1	21
1	21
1	22
1	22
1	22
1	22
1	22
1	22
1	22
1	23
1	23
1	23
1	23
1	23
1	24
1	24
1	24
1	24
1	24
1	24
1	25
1	25
1	25
1	25
1	25
1	26
1	26
1	26
1	26
1	27
1	27
1	28
1	28
1	29
Replicate (Finnigan)	Inclusions without Actin	Inclusions with Actin
2	1	3
2	1	3
2	1	5
2	1	6
2	1	6
2	1	7
2	1	9
2	1	9
2	1	10
2	1	10
2	2	11
2	2	11
2	2	12
2	2	12
2	2	14
2	2	14
2	2	16
2	2	18
2	2	21
2	2	21
2	3	22
2	3	23
2	3	25
2	3	25
2	3	25
2	3	26
2	3	28
2	3	28
2	4	29
2	4	31
2	4
2	4
2	4
2	4
2	4
2	4
2	4
2	4
2	5
2	5
2	5
2	5
2	5
2	5
2	5
2	5
2	5
2	6
2	6
2	6
2	6
2	6
2	6
2	6
2	6
2	7
2	7
2	7
2	7
2	7
2	7
2	7
2	7
2	7
2	8
2	8
2	8
2	8
2	8
2	8
2	8
2	8
2	8
2	8
2	9
2	9
2	9
2	9
2	9
2	9
2	9
2	9
2	10
2	10
2	10
2	10
2	10
2	10
2	10
2	10
2	11
2	11
2	11
2	11
2	11
2	11
2	11
2	11
2	12
2	12
2	12
2	12
2	12
2	12
2	12
2	12
2	13
2	13
2	13
2	13
2	13
2	13
2	13
2	13
2	13
2	13
2	14
2	14
2	14
2	14
2	14
2	14
2	14
2	14
2	15
2	15
2	15
2	15
2	15
2	15
2	15
2	15
2	15
2	15
2	16
2	16
2	16
2	16
2	16
2	16
2	16
2	16
2	16
2	17
2	17
2	17
2	17
2	17
2	17
2	17
2	17
2	17
2	17
2	18
2	18
2	18
2	18
2	18
2	18
2	18
2	18
2	18
2	19
2	19
2	19
2	19
2	19
2	19
2	19
2	19
2	19
2	19
2	20
2	20
2	20
2	20
2	20
2	20
2	20
2	20
2	20
2	20
2	21
2	21
2	21
2	21
2	21
2	21
2	21
2	21
2	22
2	22
2	22
2	22
2	22
2	22
2	22
2	22
2	22
2	23
2	23
2	23
2	23
2	23
2	23
2	23
2	23
2	23
2	24
2	24
2	24
2	24
2	24
2	24
2	24
2	24
2	24
2	24
2	25
2	25
2	25
2	25
2	25
2	25
2	25
2	26
2	26
2	26
2	26
2	26
2	26
2	26
2	26
2	26
2	27
2	27
2	27
2	27
2	27
2	27
2	27
2	27
2	27
2	28
2	28
2	28
2	28
2	28
2	28
2	28
2	29
2	29
2	29
2	29
2	29
2	29
2	30
2	30
2	30
2	30
2	30
2	30
2	31
2	31
2	31
2	32
2	32
2	32
2	33
2	33
2	34
2	35
2	36
Replicate (Lockart)	Inclusions without Actin	Inclusions with Actin
3	1	2
3	1	3
3	1	5
3	1	5
3	1	7
3	1	8
3	1	8
3	1	17
3	1	18
3	1	24
3	2
3	2
3	2
3	2
3	2
3	2
3	2
3	2
3	2
3	3
3	3
3	3
3	3
3	3
3	3
3	3
3	3
3	3
3	4
3	4
3	4
3	4
3	4
3	4
3	4
3	4
3	4
3	4
3	5
3	5
3	5
3	5
3	5
3	5
3	5
3	5
3	6
3	6
3	6
3	6
3	6
3	6
3	6
3	6
3	6
3	6
3	7
3	7
3	7
3	7
3	7
3	7
3	7
3	7
3	7
3	8
3	8
3	8
3	8
3	8
3	8
3	8
3	8
3	9
3	9
3	9
3	9
3	9
3	9
3	9
3	9
3	9
3	9
3	10
3	10
3	10
3	10
3	10
3	10
3	10
3	10
3	11
3	11
3	11
3	11
3	11
3	11
3	11
3	12
3	12
3	12
3	12
3	12
3	12
3	13
3	13
3	13
3	13
3	14
3	14
3	14
3	14
3	15
3	15
3	15
3	15
3	16
3	16
3	16
3	16
3	17
3	17
3	17
3	18
3	18
3	18
3	19
3	19
3	19
3	19
3	20
3	20
3	20
3	20
3	21
3	21
3	22
3	22
3	23
3	23
3	24
3	25
3	25
3	26
3	27
3	28
3	29
3	30
3	31

## Sheet: M407 p2TK2-InaC
Replicate (Hagrid)	Inclusions without Actin	Inclusions with Actin		Replicate	Inclusions without Actin	Inclusions with Actin	Total number of inclusions
1	1	1		1	214	161	375
1	1	1			Inclusions without Actin (%)	Inclusions with Actin (%)
1	1	1			0.570667	0.429333
1	2	1
1	2	1
1	2	1
1	2	1		Replicate	Inclusions without Actin	Inclusions with Actin	Total number of inclusions
1	2	2		2	132	112	244
1	2	2			Inclusions without Actin (%)	Inclusions with Actin (%)
1	3	2			0.540984	0.459016
1	3	2
1	4	3
1	4	3		Replicate	Inclusions without Actin	Inclusions with Actin	Total number of inclusions
1	4	3		3	69	92	161
1	4	3			Inclusions without Actin (%)	Inclusions with Actin (%)
1	5	3			0.428571	0.571429
1	5	3
1	6	3
1	6	3
1	6	4
1	6	4			Inclusions with Actin (%)-R1	Inclusions with Actin (%)-R2	Inclusions with Actin (%)-R3	Average number of inclusions with Actin (%)	Stdv (%)
1	6	4			0.43	0.46	0.57	0.486667	0.0737111
1	7	4
1	7	4
1	7	4
1	7	5
1	7	5
1	7	5
1	7	5
1	8	5
1	8	5
1	8	5
1	8	5
1	8	6
1	8	6
1	9	6
1	9	6
1	9	6
1	9	7
1	9	7
1	10	7
1	10	8
1	10	8
1	10	8
1	10	8
1	10	9
1	10	9
1	11	9
1	11	9
1	11	9
1	11	10
1	11	10
1	11	10
1	12	11
1	12	11
1	12	11
1	12	11
1	13	12
1	13	12
1	13	12
1	13	12
1	13	12
1	14	12
1	14	13
1	14	13
1	14	13
1	14	13
1	15	13
1	15	14
1	15	14
1	15	14
1	15	14
1	15	14
1	15	15
1	15	15
1	16	16
1	16	16
1	16	16
1	16	17
1	16	17
1	16	17
1	16	17
1	17	17
1	17	17
1	17	17
1	18	18
1	18	18
1	18	19
1	18	19
1	18	19
1	18	20
1	18	20
1	18	20
1	19	20
1	19	21
1	19	22
1	19	22
1	19	22
1	19	22
1	19	22
1	20	23
1	20	23
1	20	23
1	20	23
1	20	23
1	20	24
1	21	24
1	21	24
1	21	24
1	21	24
1	21	25
1	21	25
1	21	25
1	21	25
1	21	25
1	22	25
1	22	26
1	22	26
1	22	26
1	22	26
1	23	26
1	23	27
1	23	27
1	23	28
1	23	28
1	24	28
1	24	28
1	24	29
1	24	29
1	24	29
1	25	29
1	25	29
1	25	29
1	25	30
1	26	30
1	26	30
1	26	30
1	26	31
1	26	31
1	27	32
1	27	32
1	27	33
1	27	33
1	27	33
1	27	34
1	27	34
1	27	34
1	28	34
1	28	35
1	28	35
1	28	36
1	28	36
1	28	37
1	29	37
1	29	38
1	29	39
1	29	39
1	30	40
1	30	40
1	30	42
1	30	42
1	30
1	30
1	31
1	31
1	31
1	31
1	31
1	31
1	31
1	32
1	32
1	32
1	32
1	32
1	32
1	32
1	33
1	33
1	33
1	33
1	33
1	34
1	34
1	34
1	34
1	35
1	35
1	35
1	35
1	35
1	35
1	36
1	36
1	36
1	36
1	36
1	37
1	37
1	37
1	37
1	38
1	38
1	38
1	38
1	38
1	39
1	39
1	40
1	40
1	41
1	41
1	41
1	41
Replicate (Nagini)	Inclusions without Actin	Inclusions with Actin
2	1	1
2	1	1
2	1	1
2	1	2
2	1	2
2	1	2
2	1	2
2	2	2
2	2	3
2	2	3
2	2	3
2	2	3
2	3	4
2	3	4
2	3	4
2	3	4
2	3	4
2	3	5
2	4	5
2	4	5
2	4	5
2	4	5
2	4	6
2	5	6
2	5	6
2	5	6
2	5	6
2	5	6
2	6	7
2	6	7
2	6	7
2	6	7
2	7	8
2	7	8
2	7	8
2	7	9
2	7	9
2	7	9
2	8	9
2	8	9
2	8	9
2	8	9
2	8	10
2	8	10
2	8	10
2	9	11
2	9	11
2	9	11
2	10	11
2	10	11
2	10	12
2	10	12
2	10	12
2	10	12
2	10	12
2	11	12
2	11	12
2	11	12
2	11	12
2	11	13
2	12	13
2	13	13
2	13	13
2	13	14
2	13	14
2	13	14
2	13	14
2	14	14
2	14	14
2	14	15
2	14	15
2	15	15
2	15	15
2	15	16
2	15	16
2	15	16
2	15	16
2	16	17
2	16	17
2	16	17
2	16	17
2	16	17
2	16	17
2	17	17
2	17	18
2	17	18
2	18	18
2	18	18
2	18	19
2	18	19
2	18	19
2	18	20
2	19	20
2	19	20
2	19	21
2	19	21
2	19	22
2	19	22
2	19	23
2	20	24
2	20	25
2	20	25
2	20	25
2	20	26
2	20	27
2	21	28
2	21	29
2	21	30
2	21	30
2	21	31
2	21	32
2	22	33
2	22
2	22
2	22
2	22
2	23
2	23
2	23
2	23
2	24
2	24
2	24
2	24
2	25
2	25
2	26
2	26
2	26
2	27
2	28
2	29
Replicate (Umbridge)	Inclusions without Actin	Inclusions with Actin
3	1	1
3	1	1
3	1	1
3	1	1
3	2	1
3	2	2
3	2	2
3	2	2
3	2	2
3	3	3
3	3	3
3	3	3
3	3	3
3	4	3
3	5	4
3	5	4
3	5	4
3	5	4
3	5	4
3	5	4
3	5	4
3	6	4
3	6	5
3	6	5
3	6	6
3	6	6
3	6	7
3	6	7
3	7	7
3	7	7
3	7	7
3	8	7
3	8	8
3	8	8
3	8	8
3	9	8
3	9	8
3	9	9
3	9	9
3	9	10
3	11	10
3	11	10
3	12	10
3	12	10
3	13	10
3	13	11
3	14	11
3	14	11
3	14	11
3	14	12
3	15	12
3	16	12
3	16	13
3	18	13
3	19	13
3	19	14
3	20	15
3	21	15
3	22	15
3	23	16
3	23	16
3	23	17
3	24	17
3	25	17
3	26	17
3	26	18
3	26	18
3	28	18
3	30	19
3		19
3		20
3		20
3		20
3		21
3		21
3		21
3		22
3		22
3		22
3		23
3		24
3		24
3		24
3		25
3		25
3		27
3		27
3		27
3		28
3		29
3		29
3		30

## Sheet: L2 pBOMB
Replicate (Lupin)	Inclusions without Actin	Inclusions with Actin		Replicate	Inclusions without Actin	Inclusions with Actin	Total number of inclusions
1	1	1		1	89	49	138
1	1	1			Inclusions without Actin (%)	Inclusions with Actin (%)
1	1	1			0.644928	0.355072
1	1	1
1	1	2
1	1	2
1	2	2		Replicate	Inclusions without Actin	Inclusions with Actin	Total number of inclusions
1	2	3		2	130	48	178
1	2	3			Inclusions without Actin (%)	Inclusions with Actin (%)
1	2	3			0.730337	0.269663
1	2	4
1	2	4
1	2	5		Replicate	Inclusions without Actin	Inclusions with Actin	Total number of inclusions
1	3	5		3	96	38	134
1	3	5			Inclusions without Actin (%)	Inclusions with Actin (%)
1	3	5			0.716418	0.283582
1	3	5
1	3	6
1	3	6
1	3	7
1	4	7			Inclusions with Actin (%)-R1	Inclusions with Actin (%)-R2	Inclusions with Actin (%)-R3	Average number of inclusions with Actin (%)	Stdv (%)
1	4	7			0.36	0.27	0.28	0.303333	0.0493288
1	4	7
1	4	7
1	4	7
1	4	8
1	4	8
1	4	9
1	5	9
1	5	9
1	5	10
1	5	10
1	5	10
1	6	10
1	6	10
1	6	10
1	6	10
1	6	11
1	6	11
1	6	11
1	6	12
1	7	12
1	7	12
1	7	13
1	7	14
1	8	14
1	8	15
1	8	15
1	8	16
1	8
1	8
1	8
1	8
1	9
1	9
1	9
1	9
1	9
1	9
1	9
1	10
1	10
1	10
1	11
1	11
1	11
1	11
1	11
1	11
1	11
1	12
1	12
1	12
1	12
1	12
1	13
1	13
1	13
1	13
1	13
1	13
1	14
1	14
1	14
1	14
1	15
1	15
1	15
1	15
Replicate (Longbotton)	Inclusions without Actin	Inclusions with Actin
2	1	1
2	1	1
2	1	1
2	1	2
2	1	2
2	1	3
2	1	3
2	2	4
2	2	4
2	2	4
2	2	4
2	2	5
2	2	5
2	2	5
2	2	5
2	3	5
2	3	6
2	3	6
2	3	6
2	3	7
2	3	8
2	3	8
2	3	8
2	4	8
2	4	9
2	4	9
2	4	9
2	4	10
2	4	11
2	5	11
2	5	11
2	5	11
2	5	12
2	5	12
2	6	12
2	6	13
2	6	13
2	6	14
2	6	14
2	6	15
2	6	16
2	7	18
2	7	18
2	7	18
2	7	18
2	7	19
2	7	20
2	7	23
2	7
2	7
2	8
2	8
2	8
2	8
2	8
2	8
2	9
2	9
2	9
2	9
2	9
2	9
2	9
2	10
2	10
2	10
2	10
2	10
2	10
2	10
2	10
2	10
2	11
2	11
2	11
2	11
2	11
2	11
2	12
2	12
2	12
2	12
2	12
2	12
2	12
2	13
2	13
2	13
2	13
2	13
2	13
2	13
2	14
2	14
2	14
2	14
2	14
2	14
2	14
2	15
2	15
2	15
2	15
2	15
2	15
2	15
2	15
2	16
2	16
2	16
2	16
2	16
2	16
2	16
2	17
2	17
2	17
2	17
2	17
2	17
2	17
2	18
2	18
2	19
2	19
2	19
2	20
2	20
2	21
2	22
Replicate (Quirrell)	Inclusions without Actin	Inclusions with Actin
3	1	1
3	1	1
3	1	1
3	1	1
3	2	1
3	2	2
3	2	2
3	2	2
3	3	2
3	3	2
3	3	3
3	3	3
3	3	4
3	3	4
3	3	4
3	4	4
3	4	4
3	4	5
3	4	5
3	5	5
3	5	5
3	5	6
3	5	7
3	5	7
3	6	7
3	6	7
3	6	7
3	6	8
3	6	8
3	6	9
3	6	10
3	6	10
3	7	11
3	7	16
3	7	17
3	7	19
3	8	21
3	8	22
3	8
3	8
3	8
3	8
3	8
3	9
3	9
3	9
3	9
3	9
3	9
3	9
3	10
3	10
3	10
3	10
3	10
3	10
3	11
3	11
3	11
3	11
3	11
3	11
3	12
3	12
3	12
3	12
3	12
3	12
3	13
3	13
3	13
3	13
3	13
3	13
3	14
3	14
3	14
3	14
3	14
3	15
3	15
3	15
3	15
3	15
3	16
3	16
3	16
3	16
3	17
3	17
3	17
3	18
3	18
3	19
3	20
3	20

## Sheet: L2 cdu1 aadA pBOMB
Replicate (Dobby)	Inclusions without Actin	Inclusions with Actin		Replicate	Inclusions without Actin	Inclusions with Actin	Total number of inclusions
1	1	1		1	166	23	189
1	1	1			Inclusions without Actin (%)	Inclusions with Actin (%)
1	1	1			0.878307	0.121693
1	1	3
1	1	6
1	1	8
1	1	9		Replicate	Inclusions without Actin	Inclusions with Actin	Total number of inclusions
1	1	9		2	212	16	228
1	2	9			Inclusions without Actin (%)	Inclusions with Actin (%)
1	2	10			0.929825	0.0701754
1	2	10
1	2	10
1	2	10		Replicate	Inclusions without Actin	Inclusions with Actin	Total number of inclusions
1	2	10		3	116	5	121
1	2	11			Inclusions without Actin (%)	Inclusions with Actin (%)
1	2	11			0.958678	0.0413223
1	2	12
1	2	12
1	3	12
1	3	12
1	3	13			Inclusions with Actin (%)-R1	Inclusions with Actin (%)-R2	Inclusions with Actin (%)-R3	Average number of inclusions with Actin (%)	Stdv (%)
1	3	13			0.12	0.07	0.04	0.0766667	0.0404145
1	3	17
1	3
1	3
1	3
1	3
1	4
1	4
1	4
1	4
1	4
1	4
1	4
1	4
1	4
1	4
1	5
1	5
1	5
1	5
1	5
1	5
1	5
1	5
1	5
1	5
1	6
1	6
1	6
1	6
1	6
1	6
1	6
1	6
1	6
1	7
1	7
1	7
1	7
1	7
1	7
1	7
1	7
1	7
1	7
1	8
1	8
1	8
1	8
1	8
1	8
1	8
1	8
1	8
1	9
1	9
1	9
1	9
1	9
1	9
1	9
1	10
1	10
1	10
1	10
1	10
1	11
1	11
1	11
1	11
1	11
1	11
1	11
1	12
1	12
1	12
1	12
1	12
1	12
1	13
1	13
1	13
1	13
1	13
1	13
1	13
1	13
1	14
1	14
1	14
1	14
1	14
1	14
1	14
1	14
1	14
1	15
1	15
1	15
1	15
1	15
1	15
1	15
1	15
1	16
1	16
1	16
1	16
1	16
1	16
1	16
1	16
1	17
1	17
1	17
1	17
1	17
1	17
1	17
1	18
1	18
1	18
1	18
1	18
1	18
1	18
1	19
1	19
1	19
1	19
1	20
1	20
1	20
1	20
1	21
1	21
1	21
1	21
1	22
1	22
1	23
1	24
1	25
1	26
1	27
Replicate (Lestrange)	Inclusions without Actin	Inclusions with Actin
2	1	2
2	1	3
2	1	5
2	1	5
2	1	7
2	1	8
2	1	9
2	1	10
2	1	12
2	1	12
2	2	13
2	2	14
2	2	14
2	2	14
2	2	17
2	2	19
2	2
2	2
2	2
2	3
2	3
2	3
2	3
2	3
2	3
2	3
2	3
2	3
2	4
2	4
2	4
2	4
2	4
2	4
2	4
2	4
2	4
2	4
2	5
2	5
2	5
2	5
2	5
2	5
2	5
2	5
2	6
2	6
2	6
2	6
2	6
2	6
2	6
2	6
2	6
2	6
2	7
2	7
2	7
2	7
2	7
2	7
2	7
2	7
2	7
2	8
2	8
2	8
2	8
2	8
2	8
2	8
2	8
2	8
2	9
2	9
2	9
2	9
2	9
2	9
2	9
2	9
2	9
2	10
2	10
2	10
2	10
2	10
2	10
2	10
2	10
2	10
2	11
2	11
2	11
2	11
2	11
2	11
2	11
2	11
2	11
2	11
2	12
2	12
2	12
2	12
2	12
2	12
2	12
2	12
2	13
2	13
2	13
2	13
2	13
2	13
2	13
2	13
2	13
2	14
2	14
2	14
2	14
2	14
2	14
2	14
2	15
2	15
2	15
2	15
2	15
2	15
2	15
2	15
2	15
2	15
2	16
2	16
2	16
2	16
2	16
2	16
2	16
2	16
2	16
2	16
2	17
2	17
2	17
2	17
2	17
2	17
2	17
2	17
2	18
2	18
2	18
2	18
2	18
2	18
2	18
2	18
2	19
2	19
2	19
2	19
2	19
2	19
2	19
2	20
2	20
2	20
2	20
2	20
2	20
2	20
2	20
2	21
2	21
2	21
2	21
2	21
2	21
2	21
2	22
2	22
2	22
2	22
2	22
2	22
2	23
2	23
2	23
2	23
2	23
2	23
2	24
2	24
2	24
2	24
2	24
2	24
2	25
2	25
2	25
2	25
2	26
2	26
2	26
2	27
2	27
2	28
Replicate (Myrtle)	Inclusions without Actin	Inclusions with Actin
3	1	5
3	1	17
3	1	5
3	1	8
3	1	6
3	1
3	1
3	1
3	1
3	1
3	2
3	2
3	2
3	2
3	2
3	2
3	2
3	2
3	2
3	2
3	3
3	3
3	3
3	3
3	3
3	3
3	3
3	3
3	3
3	3
3	4
3	4
3	4
3	4
3	4
3	4
3	4
3	4
3	4
3	4
3	5
3	5
3	5
3	5
3	5
3	5
3	5
3	5
3	6
3	6
3	6
3	6
3	6
3	6
3	6
3	6
3	6
3	7
3	7
3	7
3	7
3	7
3	7
3	7
3	7
3	7
3	7
3	8
3	8
3	8
3	8
3	8
3	8
3	8
3	9
3	9
3	9
3	9
3	9
3	9
3	9
3	9
3	10
3	10
3	10
3	10
3	10
3	10
3	10
3	10
3	11
3	11
3	11
3	11
3	11
3	11
3	12
3	12
3	12
3	12
3	12
3	12
3	13
3	13
3	13
3	14
3	14
3	14
3	15
3	15
3	15
3	16
3	16
3	16
3	17
3	18

## Sheet: cdu1 aadA pBOMB-Cdu1
Replicate (Snape)	Inclusions without Actin	Inclusions with Actin		Replicate	Inclusions without Actin	Inclusions with Actin	Total number of inclusions
1	1	1		1	101	97	198
1	1	1			Inclusions without Actin (%)	Inclusions with Actin (%)
1	1	1			0.510101	0.489899
1	1	1
1	1	1
1	2	2
1	2	2		Replicate	Inclusions without Actin	Inclusions with Actin	Total number of inclusions
1	2	2		2	112	80	192
1	2	2			Inclusions without Actin (%)	Inclusions with Actin (%)
1	2	2			0.583333	0.416667
1	3	3
1	3	3
1	3	3		Replicate	Inclusions without Actin	Inclusions with Actin	Total number of inclusions
1	3	3		3	38	68	106
1	3	4			Inclusions without Actin (%)	Inclusions with Actin (%)
1	3	4			0.358491	0.641509
1	4	4
1	4	4
1	5	4
1	5	4
1	5	4			Inclusions with Actin (%)-R1	Inclusions with Actin (%)-R2	Inclusions with Actin (%)-R3	Average number of inclusions with Actin (%)	Stdv (%)
1	5	4			0.49	0.42	0.64	0.516667	0.112398
1	5	5
1	5	5
1	6	5
1	6	5
1	6	6
1	6	6
1	6	6
1	7	6
1	7	6
1	7	7
1	7	7
1	7	7
1	7	8
1	7	8
1	8	8
1	8	8
1	8	8
1	8	8
1	9	9
1	9	9
1	9	9
1	9	10
1	9	11
1	9	11
1	9	11
1	10	11
1	10	12
1	10	12
1	10	12
1	10	12
1	10	13
1	10	13
1	10	13
1	10	13
1	11	13
1	11	13
1	11	14
1	11	14
1	11	14
1	11	14
1	12	15
1	12	15
1	12	15
1	12	15
1	12	15
1	12	15
1	13	16
1	13	16
1	13	16
1	13	16
1	14	16
1	14	16
1	14	17
1	14	17
1	14	17
1	14	17
1	15	17
1	15	17
1	15	17
1	15	18
1	16	18
1	16	18
1	16	18
1	16	19
1	17	19
1	17	20
1	17	20
1	18	20
1	18	21
1	18	21
1	18	22
1	19	23
1	19	24
1	19	25
1	19	26
1	20
1	21
1	27
1	28
Replicate (Parkinson)	Inclusions without Actin	Inclusions with Actin
2	1	1
2	1	1
2	1	2
2	1	2
2	1	2
2	1	2
2	1	2
2	1	3
2	2	3
2	2	3
2	2	4
2	2	4
2	2	4
2	3	4
2	3	5
2	3	5
2	3	5
2	3	5
2	3	6
2	3	6
2	4	6
2	4	6
2	4	6
2	4	6
2	4	6
2	4	6
2	5	7
2	5	7
2	5	7
2	5	7
2	5	7
2	5	8
2	6	8
2	6	8
2	7	9
2	7	9
2	7	9
2	7	9
2	7	10
2	8	10
2	8	10
2	8	10
2	8	10
2	8	11
2	8	11
2	8	11
2	9	11
2	9	11
2	9	11
2	9	12
2	9	12
2	9	12
2	10	12
2	10	13
2	10	13
2	10	14
2	10	14
2	11	14
2	11	15
2	11	15
2	11	16
2	12	16
2	12	16
2	12	16
2	12	16
2	12	17
2	12	17
2	13	17
2	13	18
2	13	18
2	13	19
2	13	19
2	13	20
2	13	21
2	14	22
2	14	23
2	14	24
2	14	25
2	14	25
2	14	26
2	15
2	15
2	15
2	15
2	15
2	15
2	15
2	16
2	16
2	17
2	17
2	17
2	17
2	18
2	18
2	18
2	19
2	19
2	20
2	20
2	20
2	21
2	21
2	21
2	22
2	22
2	23
2	23
2	24
2	27
2	28
2	29
Replicate (Winky)	Inclusions without Actin	Inclusions with Actin
3	1	1
3	1	1
3	2	1
3	2	1
3	2	1
3	2	1
3	2	1
3	2	1
3	3	2
3	3	2
3	3	2
3	4	2
3	5	3
3	5	3
3	5	3
3	5	3
3	5	3
3	6	3
3	6	3
3	7	4
3	7	4
3	7	4
3	7	4
3	7	4
3	7	4
3	7	4
3	8	4
3	8	4
3	8	5
3	9	5
3	9	5
3	9	5
3	9	5
3	10	6
3	11	6
3	13	6
3	15	6
3	18	6

## Sheet: cdu1 aadA pBOMB-Cdu1 C345A
Replicate (Malfoy)	c	Inclusions with Actin		Replicate	Inclusions without Actin	Inclusions with Actin	Total number of inclusions
1	1	1		1	151	24	175
1	1	1			Inclusions without Actin (%)	Inclusions with Actin (%)
1	1	1			0.862857	0.137143
1	1	2
1	1	2
1	1	2
1	1	3		Replicate	Inclusions without Actin	Inclusions with Actin	Total number of inclusions
1	2	3		2	96	16	112
1	2	4			Inclusions without Actin (%)	Inclusions with Actin (%)
1	2	6			0.857143	0.142857
1	2	6
1	2	7
1	2	8		Replicate	Inclusions without Actin	Inclusions with Actin	Total number of inclusions
1	2	10		3	74	9	83
1	3	10			Inclusions without Actin (%)	Inclusions with Actin (%)
1	3	12			0.891566	0.108434
1	3	12
1	3	13
1	3	13
1	3	14
1	3	15			Inclusions with Actin (%)-R1	Inclusions with Actin (%)-R2	Inclusions with Actin (%)-R3	Average number of inclusions with Actin (%)	Stdv (%)
1	3	15			0.14	0.14	0.11	0.13	0.0173205
1	4	15
1	4	17
1	4
1	4
1	4
1	4
1	4
1	4
1	4
1	5
1	5
1	5
1	5
1	5
1	5
1	5
1	5
1	5
1	5
1	6
1	6
1	6
1	6
1	6
1	6
1	6
1	6
1	7
1	7
1	7
1	7
1	7
1	7
1	7
1	7
1	7
1	8
1	8
1	8
1	8
1	8
1	8
1	8
1	8
1	8
1	9
1	9
1	9
1	9
1	9
1	9
1	9
1	9
1	9
1	9
1	10
1	10
1	10
1	10
1	10
1	10
1	10
1	10
1	11
1	11
1	11
1	11
1	11
1	11
1	11
1	11
1	11
1	11
1	12
1	12
1	12
1	12
1	12
1	12
1	12
1	12
1	13
1	13
1	13
1	13
1	13
1	13
1	13
1	13
1	14
1	14
1	14
1	14
1	14
1	14
1	14
1	15
1	15
1	15
1	15
1	16
1	16
1	16
1	16
1	16
1	16
1	16
1	17
1	17
1	17
1	17
1	17
1	17
1	18
1	18
1	18
1	18
1	19
1	19
1	19
1	20
1	20
1	20
1	21
1	21
1	21
1	22
1	23
1	24
Replicate (Delacour)	Inclusions without Actin	Inclusions with Actin
2	1	1
2	1	2
2	1	2
2	1	3
2	1	3
2	1	3
2	1	3
2	1	4
2	1	7
2	2	7
2	2	7
2	2	8
2	2	9
2	2	14
2	2	15
2	2	17
2	2
2	3
2	3
2	3
2	3
2	3
2	3
2	4
2	4
2	4
2	4
2	4
2	4
2	4
2	4
2	4
2	5
2	5
2	5
2	5
2	5
2	5
2	5
2	5
2	5
2	5
2	6
2	6
2	6
2	6
2	6
2	6
2	6
2	6
2	6
2	6
2	7
2	7
2	7
2	7
2	7
2	7
2	7
2	8
2	8
2	8
2	8
2	8
2	8
2	8
2	8
2	9
2	9
2	9
2	9
2	9
2	9
2	9
2	9
2	10
2	10
2	10
2	10
2	10
2	10
2	10
2	10
2	11
2	11
2	11
2	11
2	11
2	12
2	12
2	12
2	13
2	13
2	14
2	15
2	16
Replicate (Black)	Inclusions without Actin	Inclusions with Actin
3	1	6
3	1	2
3	1	7
3	1	4
3	1	2
3	1	3
3	1	1
3	1	6
3	1	9
3	2
3	2
3	2
3	2
3	2
3	2
3	2
3	2
3	3
3	3
3	3
3	3
3	3
3	3
3	3
3	3
3	3
3	4
3	4
3	4
3	4
3	4
3	4
3	4
3	4
3	4
3	5
3	5
3	5
3	5
3	5
3	5
3	5
3	5
3	5
3	5
3	6
3	6
3	6
3	6
3	6
3	6
3	6
3	6
3	7
3	7
3	7
3	7
3	7
3	7
3	7
3	7
3	7
3	8
3	8
3	8
3	8
3	8
3	8
3	9
3	9
3	9
3	10
3	11
3	12

## Sheet: cdu1 aadA pBOMB-Cdu1 I225A
Replicate (Weasley)	51	Inclusions with Actin		Replicate	Inclusions without Actin	Inclusions with Actin	Total number of inclusions
1	1	1		1	69	73	142
1	1	1			Inclusions without Actin (%)	Inclusions with Actin (%)
1	1	1			0.485915	0.514085
1	1	1
1	1	2
1	1	2
1	2	2		Replicate	Inclusions without Actin	Inclusions with Actin	Total number of inclusions
1	2	2		2	95	54	149
1	2	2			Inclusions without Actin (%)	Inclusions with Actin (%)
1	3	2			0.637584	0.362416
1	3	2
1	3	3
1	3	3		Replicate	Inclusions without Actin	Inclusions with Actin	Total number of inclusions
1	4	3		3	71	76	147
1	4	3			Inclusions without Actin (%)	Inclusions with Actin (%)
1	4	3			0.482993	0.517007
1	4	3
1	4	4
1	4	4
1	5	4
1	5	4			Inclusions with Actin (%)-R1	Inclusions with Actin (%)-R2	Inclusions with Actin (%)-R3	Average number of inclusions with Actin (%)	Stdv (%)
1	5	5			0.51	0.36	0.52	0.463333	0.0896289
1	6	5
1	6	5
1	6	5
1	6	5
1	7	5
1	7	5
1	7	6
1	7	6
1	8	6
1	8	6
1	8	6
1	8	6
1	8	7
1	8	7
1	8	7
1	9	7
1	9	7
1	9	7
1	9	8
1	9	8
1	10	8
1	10	9
1	10	9
1	10	9
1	10	9
1	10	9
1	10	10
1	11	10
1	11	10
1	11	11
1	11	11
1	12	11
1	12	11
1	12	11
1	12	12
1	12	12
1	13	12
1	13	12
1	13	13
1	13	13
1	13	13
1	14	14
1	14	14
1	14	14
1	15	14
1	16	15
1	18	15
1		15
1		15
1		16
1		17
Replicate (Tonks)	Inclusions without Actin	Inclusions with Actin
2	1	1
2	1	1
2	1	1
2	1	1
2	1	1
2	2	3
2	2	3
2	2	3
2	2	3
2	2	3
2	2	4
2	2	4
2	2	5
2	2	5
2	2	5
2	3	6
2	3	6
2	3	6
2	3	7
2	3	7
2	4	7
2	4	7
2	4	7
2	4	8
2	4	8
2	4	8
2	4	8
2	4	8
2	5	8
2	5	9
2	5	9
2	5	9
2	5	9
2	5	10
2	5	10
2	6	10
2	6	10
2	6	10
2	6	10
2	6	10
2	6	11
2	6	11
2	7	11
2	7	11
2	7	11
2	7	12
2	7	12
2	8	13
2	8	13
2	8	13
2	8	13
2	9	17
2	9	19
2	9	20
2	9
2	9
2	9
2	10
2	10
2	10
2	11
2	11
2	11
2	11
2	11
2	12
2	12
2	12
2	12
2	12
2	12
2	12
2	12
2	13
2	13
2	13
2	13
2	13
2	14
2	14
2	14
2	14
2	14
2	14
2	14
2	15
2	15
2	15
2	15
2	15
2	16
2	16
2	16
2	17
2	18
Replicate (Trelawney)	Inclusions without Actin	Inclusions with Actin
3	1	1
3	1	1
3	1	1
3	1	1
3	1	2
3	1	2
3	2	2
3	2	3
3	2	3
3	2	4
3	2	4
3	2	4
3	2	4
3	3	4
3	3	4
3	3	4
3	3	5
3	3	5
3	3	5
3	3	5
3	3	6
3	4	6
3	4	6
3	4	6
3	5	6
3	5	6
3	5	6
3	5	6
3	5	7
3	5	7
3	6	7
3	6	7
3	7	7
3	7	8
3	7	8
3	7	8
3	7	8
3	8	8
3	8	8
3	8	9
3	8	9
3	9	9
3	9	9
3	9	9
3	9	10
3	9	10
3	10	10
3	10	10
3	10	10
3	10	11
3	10	11
3	11	11
3	11	11
3	11	12
3	11	12
3	11	12
3	12	12
3	12	12
3	13	12
3	13	12
3	14	13
3	14	13
3	15	13
3	15	13
3	16	13
3	16	14
3	17	14
3	18	14
3	19	14
3	19	15
3	20	15
3		16
3		17
3		18
3		21
3		22

## Sheet: cdu1 aadA pBOMB-Cdu1 K268E
Replicate (Dumbledore)	Inclusions without Actin	Inclusions with Actin		Replicate	Inclusions without Actin	Inclusions with Actin	Total number of inclusions
1	1	1		1	146	19	165
1	1	2			Inclusions without Actin (%)	Inclusions with Actin (%)
1	1	3			0.884848	0.115152
1	1	4
1	1	4
1	1	5
1	1	6		Replicate	Inclusions without Actin	Inclusions with Actin	Total number of inclusions
1	1	7		2	162	21	183
1	1	7			Inclusions without Actin (%)	Inclusions with Actin (%)
1	2	7			0.885246	0.114754
1	2	8
1	2	8
1	2	11		Replicate	Inclusions without Actin	Inclusions with Actin	Total number of inclusions
1	2	13		3	117	7	124
1	2	13			Inclusions without Actin (%)	Inclusions with Actin (%)
1	2	16			0.943548	0.0564516
1	2	17
1	2	18
1	3	19
1	3
1	3				Inclusions with Actin (%)-R1	Inclusions with Actin (%)-R2	Inclusions with Actin (%)-R3	Average number of inclusions with Actin (%)	Stdv (%)
1	3				0.12	0.11	0.06	0.0966667	0.0321455
1	3
1	3
1	3
1	3
1	3
1	4
1	4
1	4
1	4
1	4
1	4
1	4
1	4
1	5
1	5
1	5
1	5
1	5
1	5
1	5
1	5
1	5
1	6
1	6
1	6
1	6
1	6
1	6
1	6
1	6
1	6
1	7
1	7
1	7
1	7
1	7
1	7
1	7
1	8
1	8
1	8
1	8
1	8
1	8
1	8
1	8
1	9
1	9
1	9
1	9
1	9
1	9
1	9
1	9
1	9
1	9
1	10
1	10
1	10
1	10
1	10
1	10
1	10
1	10
1	10
1	10
1	11
1	11
1	11
1	11
1	11
1	11
1	11
1	11
1	11
1	12
1	12
1	12
1	12
1	12
1	12
1	12
1	12
1	12
1	12
1	13
1	13
1	13
1	13
1	13
1	13
1	13
1	14
1	14
1	14
1	14
1	14
1	14
1	14
1	14
1	14
1	15
1	15
1	15
1	15
1	15
1	15
1	15
1	16
1	16
1	16
1	16
1	16
1	16
1	17
1	17
1	17
1	17
1	18
1	19
1	20
1	21
1	22
1	23
Replicate (Filch)	Inclusions without Actin	Inclusions with Actin
2	1	1
2	1	1
2	1	2
2	1	2
2	1	4
2	1	4
2	1	6
2	1	6
2	2	6
2	2	8
2	2	8
2	2	8
2	2	9
2	2	9
2	2	9
2	2	12
2	3	13
2	3	15
2	3	16
2	3	16
2	3	16
2	3
2	3
2	3
2	3
2	3
2	4
2	4
2	4
2	4
2	4
2	4
2	4
2	4
2	5
2	5
2	5
2	5
2	5
2	5
2	5
2	5
2	5
2	5
2	6
2	6
2	6
2	6
2	6
2	6
2	6
2	7
2	7
2	7
2	7
2	7
2	7
2	7
2	7
2	7
2	7
2	8
2	8
2	8
2	8
2	8
2	8
2	8
2	9
2	9
2	9
2	9
2	9
2	9
2	9
2	10
2	10
2	10
2	10
2	10
2	10
2	10
2	10
2	10
2	10
2	11
2	11
2	11
2	11
2	11
2	11
2	11
2	11
2	11
2	11
2	12
2	12
2	12
2	12
2	12
2	12
2	12
2	12
2	12
2	13
2	13
2	13
2	13
2	13
2	13
2	13
2	13
2	13
2	14
2	14
2	14
2	14
2	14
2	14
2	14
2	14
2	14
2	15
2	15
2	15
2	15
2	15
2	15
2	15
2	15
2	16
2	16
2	16
2	16
2	16
2	16
2	17
2	17
2	17
2	17
2	17
2	17
2	17
2	18
2	18
2	18
2	18
2	18
2	18
2	19
2	19
2	19
2	19
2	20
2	20
2	20
2	21
2	21
2	21
2	22
2	22
2	23
Replicate (Evans)	Inclusions without Actin	Inclusions with Actin
3	1	2
3	1	8
3	1	5
3	1	8
3	1	4
3	1	4
3	1	5
3	1
3	1
3	1
3	2
3	2
3	2
3	2
3	2
3	2
3	2
3	2
3	2
3	3
3	3
3	3
3	3
3	3
3	3
3	3
3	3
3	3
3	3
3	4
3	4
3	4
3	4
3	4
3	4
3	4
3	4
3	5
3	5
3	5
3	5
3	5
3	5
3	5
3	5
3	6
3	6
3	6
3	6
3	6
3	6
3	6
3	6
3	6
3	6
3	7
3	7
3	7
3	7
3	7
3	7
3	7
3	7
3	7
3	7
3	8
3	8
3	8
3	8
3	8
3	8
3	8
3	8
3	9
3	9
3	9
3	9
3	9
3	9
3	9
3	9
3	9
3	9
3	10
3	10
3	10
3	10
3	10
3	10
3	10
3	10
3	11
3	11
3	11
3	11
3	11
3	11
3	11
3	12
3	12
3	12
3	12
3	12
3	12
3	12
3	13
3	13
3	13
3	13
3	13
3	13
3	14
3	14
3	14
3	14
3	15
3	16
