# Supplementary material for: The acetylase activity of Cdu1 regulates bacterial exit from infected cells by protecting Chlamydia effectors from degradation
Source: eLife journal article supplement (doi:10.7554/elife.87386), 2023-05-12
Supplement: fig7-figsupp1-data1 [file Inclusion number quantification.xlsx]

## Sheet: Inclusion number
	Number of inclusions/well
Strain	Replicate 1	Replicate 2	Replicate 3
L2 434 Bu pBOMB_48 hpi	629370	291375	275835
cdu1::GII aadA pBOMB_48 hpi	574980	473970	275835
cdu1::GII aadA pBOMB Cdu1_48 hpi	252525	555555	722610
cdu1::GII aadA pBOMB Cdu1 I225A_48 hpi	271950	574980	532245
inaC::GII bla_48 hpi	586635	652680	404040
ipam::GII bla_48 hpi	571095	470085	353535
ctl0480::GII aadA_48 hpi	563325	598290	411810
