# Supplementary material for: The acetylase activity of Cdu1 regulates bacterial exit from infected cells by protecting Chlamydia effectors from degradation
Source: eLife journal article supplement (doi:10.7554/elife.87386), 2023-05-12
Supplement: fig7-figsupp1-data1 [file Inclusion perimenter length quantification.xlsx]

## Sheet: L2 pBOMB_48 hpi
Strain	L2 pBOMB_48 hpi
Field	F1
Inclusion	Perimeter length (microns)
1	193.741
2	150.346
3	172.313
4	165.441
5	191.028
6	206.052
7	169.783
8	194.624
9	193.98
10	160.515
11	163.019
12	180.651
13	236.717
14	183.796
15	154.516
16	180.407
17	257.665
18	214.333
19	184.947
20	183.439
21	176.574
22	199.683
23	168.96
24	212.243
25	200.857
26	233.457
27	219.181
28	209.947
29	212.436
30	188.564
31	193.411
32	191.402
33	136.8
34	213.554
35	186.956
36	207.235
37	184.734
38	161.449
39	219.498
40	206.073
41	223.571
42	177.618
43	218.981
44	177.288
45	169.545
46	217.783
47	166.857
48	187.791
49	201.49
50	201.969
Strain	L2 pBOMB_48 hpi
Field	F2
1	177.023
2	157.298
3	210.008
4	284.856
5	327.14
6	199.289
7	267.16
8	181.472
9	157.167
10	207.748
11	184.833
12	189.597
13	151.467
14	181.238
15	251.802
16	197.44
17	181.084
18	183.338
19	157.297
20	202.591
21	210.987
22	181.056
23	202.977
24	196.881
25	219.464
26	268.016
27	162.863
28	203.035
29	235.297
30	196.378
31	227.756
32	199.174
33	178.477
34	176.98
35	174.148
36	199.246
37	247.019
38	199.425
39	210.843
40	199.09
41	248.311
42	212.905
43	196.327
44	230.494
45	214.612
46	166.31
47	221.546
48	200.286
49	198.074
50	177.405
Strain	L2 pBOMB_48 hpi
Field	F3
1	228.8
2	163.37
3	164.018
4	180.788
5	171.71
6	169.183
7	196.911
8	203.842
9	186.918
10	184.889
11	143.333
12	219.258
13	178.986
14	178.92
15	189.447
16	188.83
17	232.985
18	170.754
19	206.17
20	183.182
21	214.123
22	193.422
23	184.295
24	197.496
25	205.227
26	188.024
27	209.768
28	208.871
29	214.294
30	190.346
31	189.8
32	222.527
33	200.946
34	190.97
35	209.973
36	185.187
37	183.666
38	149.747
39	224.975
40	200.273
41	237.268
42	227.007
43	199.621
44	177.264
45	222.647
46	258.756
47	230.958
48	210.859
49	229.269
50	206.402
Strain	L2 pBOMB_48 hpi
Field	F4
1	239.881
2	197.034
3	171.887
4	199.944
5	200.835
6	187.908
7	230.66
8	175.486
9	219.945
10	215.56
11	166.758
12	188.758
13	195.845
14	202.932
15	192.688
16	184.333
17	193.284
18	174.237
19	203.781
20	200.38
21	207.502
22	182.121
23	183.239
24	258.885
25	218.081
26	186.243
27	206.018
28	211.152
29	205.641
30	178.818
31	206.094
32	225.172
33	168.686
34	207.079
35	211.43
36	217.174
37	197.211
38	202.626
39	243.56
40	174.271
41	201.542
42	213.5
43	294.915
44	218.209
45	214.732
46	207.71
47	229.785
48	170.91
49	218.334
50	164.862
Strain	L2 pBOMB_48 hpi
Field	F5
1	223.792
2	242.606
3	182.248
4	206.41
5	225.976
6	204.596
7	158.2
8	171.027
9	162.395
10	258.581
11	164.969
12	222.842
13	238.715
14	184.014
15	198.059
16	165.456
17	187.527
18	180.123
19	180.49
20	141.072
21	199.736
22	216.447
23	202.606
24	179.136
25	162.964
26	199.321
27	179.295
28	219.668
29	171.429
30	210.549
31	194.111
32	181.752
33	198.061
34	187.58
35	166.116
36	151.998
37	184.037
38	231.936
39	228.231
40	212.276
41	223.509
42	239.712
43	224.851
44	190.974
45	289.521
46	181.24
47	140.519
48	221.944
49	182.369
50	173.392

## Sheet: cdu1 GII pBOMB
Strain	cdu1 GII pBOMB_48 hpi
Field	F1
1	198.686
2	195.638
3	212.89
4	171.446
5	164.323
6	211.101
7	164.302
8	238.749
9	239.076
10	351.609
11	192.104
12	177.937
13	164.577
14	245.969
15	151.347
16	171.267
17	183.596
18	188.039
19	175.587
20	199.831
21	207.043
22	194.642
23	194.626
24	223.429
25	210.169
26	205.073
27	192.69
28	216.778
29	200.435
30	202.582
31	206.514
32	206.704
33	180.39
34	220.413
35	184.535
36	238.731
37	195.285
38	161.397
39	172.081
40	227.785
41	250.402
Strain	cdu1 GII pBOMB_48 hpi
Field	F2
1	192.948
2	179.268
3	198.33
4	154.979
5	197.489
6	183.327
7	158.235
8	155.348
9	382.36
10	184.878
11	216.535
12	204.058
13	186.006
14	180.654
15	143.414
16	161.147
17	205.466
18	169.639
19	166.92
20	180.375
21	182.608
22	186.885
23	218.617
24	171.644
25	141.957
26	169.18
27	185.287
28	218.101
29	217.728
30	181.421
31	186.974
32	239.276
33	261.217
34	280.99
35	474.554
36	207.908
37	196.066
38	205.807
39	168.509
40	189.023
41	168.909
42	149.546
43	189.822
44	159.668
45	209.114
Strain	cdu1 GII pBOMB_48 hpi
Field	F3
1	200.562
2	217.971
3	218.166
4	262.711
5	223.441
6	245.323
7	209.624
8	252.446
9	204.626
10	267.435
11	225.694
12	171.966
13	144.435
14	184.75
15	181.537
16	241.624
17	135.85
18	304.115
19	181.907
20	174.196
21	230.68
22	173.849
23	232.718
24	214.968
25	171.7
26	189.092
27	236.157
28	182.465
29	192.66
30	203.748
31	220.368
32	185.076
33	232.02
34	192.313
35	158.712
36	196.217
37	157.946
38	198.385
39	249.517
40	157.621
Strain	cdu1 GII pBOMB_48 hpi
Field	F4
1	203.153
2	185.066
3	213.593
4	182.853
5	202.964
6	193.455
7	197.34
8	180.302
9	202.681
10	182.503
11	165.28
12	152.37
13	195.822
14	183.299
15	187.53
16	165.283
17	136.54
18	235.727
19	202.253
20	183.598
21	250.678
22	202.242
23	227.544
24	197.819
25	221.162
26	184.941
27	211.199
28	162.426
29	233.255
30	237.45
31	191.909
32	156.116
33	180.744
34	155.078
35	176.357
36	190.668
37	189.383
38	189.738
39	192.44
40	188.604
41	140.976
42	242.431
43	237.363
44	210.56
45	157.453
Strain	cdu1 GII pBOMB_48 hpi
Field	F5
1	179.566
2	160.391
3	191.725
4	201.07
5	258.766
6	308.772
7	194.562
8	198.179
9	190.878
10	235.5
11	277.518
12	222.22
13	225.222
14	191.543
15	210.098
16	202.768
17	183.353
18	173.074
19	189.424
20	193.349
21	205.813
22	210.559
23	196.153
24	264.431
25	192.248
26	175.82
27	184.108
28	184.334
29	173.637
30	194.864
31	169.226
32	216.819
33	151.417
34	164.95
35	195.827
36	196.039
37	189.941
38	139.582
39	135.113
40	174.455
41	201.11
42	215.795
43	185.481
44	148.245
45	205.195
46	207.129
47	230.905

## Sheet: cdu1GII_Cdu1
Strain	cdu1 GII pBOMB_Cdu1_48 hpi
Field	F1
1	206.6
2	238.104
3	201.296
4	131.061
5	164.251
6	212.036
7	221.507
8	241.393
9	240.139
10	216.337
11	151.71
12	233.801
13	224.151
14	259.243
15	238.762
16	203.607
17	191.544
18	223.171
19	156.39
20	202.233
21	285.346
22	172.472
23	166.09
24	138.877
25	200.003
26	178.873
27	200.808
28	252.552
29	236.407
30	234.689
31	149.972
32	248.013
33	180.898
34	234.017
35	212.682
36	194.465
37	190.439
38	206.593
39	318.981
40	190.817
41	171.707
42	266.758
43	192.009
44	197.57
45	211.172
46	146.88
47	208.028
Strain	cdu1 GII pBOMB_Cdu1_48 hpi
Field	F2
1	168.765
2	159.21
3	190.392
4	181.661
5	186.827
6	165.113
7	177.508
8	292.757
9	162.891
10	188.594
11	215.097
12	185.409
13	184.912
14	201.694
15	211.291
16	180.625
17	186.079
18	204.729
19	181.326
20	189.712
21	362.684
22	198.602
23	199.977
24	185.19
25	232.1
26	145.35
27	185.765
28	202.9
29	224.542
30	201.733
31	212.085
32	176.299
33	228.083
34	167.379
35	176.706
36	167.797
37	144.827
38	206.949
39	197.248
40	181.547
41	185.138
42	250.333
43	168.549
44	161.36
45	236.56
Strain	cdu1 GII pBOMB_Cdu1_48 hpi
Field	F3
1	182.325
2	234.68
3	164.445
4	144.508
5	166.475
6	253.304
7	205.493
8	187.509
9	201.732
10	239.719
11	238.236
12	210.716
13	263.501
14	205.685
15	210.684
16	211.775
17	230.363
18	227.454
19	162.856
20	169.29
21	233.949
22	168.093
23	247.846
24	182.554
25	183.738
26	215.015
27	185.5
28	223.92
29	212.729
30	191.298
31	301.563
32	244.458
33	205.005
34	185.759
35	225.528
36	245.73
37	257.854
38	183.35
39	135.994
40	247.474
41	178.103
42	226.404
43	198.541
44	179.008
45	174.455
Strain	cdu1 GII pBOMB_Cdu1_48 hpi
Field	F4
1	207.828
2	163.857
3	220.345
4	286.649
5	211.396
6	174.74
7	210.718
8	181.025
9	198.792
10	153.35
11	110.5
12	167.921
13	252.046
14	166.267
15	315.382
16	233.35
17	176.979
18	306.977
19	155.808
20	167.146
21	182.169
22	209.579
23	198.984
24	230.423
25	218.154
26	154.272
27	245.64
28	240.037
29	204.974
30	194.528
31	200.66
32	176.809
33	196.282
34	166.968
35	127.139
36	182.978
37	188.593
38	144.591
39	147.402
40	147.693
Strain	cdu1 GII pBOMB_Cdu1_48 hpi
Field	F5
1	198.552
2	229.188
3	238.951
4	191.012
5	176.103
6	193.518
7	216.496
8	159.995
9	172.226
10	158.753
11	165.2
12	219.327
13	298.668
14	176.004
15	201.004
16	221.722
17	297.01
18	169.319
19	164.598
20	189.394
21	213.445
22	204.548
23	184.147
24	193.621
25	154.433
26	176.242
27	199.84
28	133.616
29	206.345
30	192.637
31	210.648
32	266.542
33	198.836
34	202.908
35	187.612
36	163.325
37	186.697
38	131.447
39	165.637
40	190.88
41	189.908
42	157.489
43	162.589
44	194.231
45	184.549

## Sheet: cdu1 GII_I225A
Strain	cdu1 GII pBOMB_Cdu1 I225A_48 hpi
Field	F1
1	180.682
2	153.95
3	188.681
4	133.684
5	152.849
6	264.941
7	183.987
8	219.27
9	159.447
10	153.311
11	168.964
12	183.543
13	259.07
14	202.57
15	171.994
16	189.512
17	214.204
18	240.044
19	162.917
20	188.012
21	143.949
22	155.24
23	147.554
24	224.67
25	156.039
26	250.53
27	182.646
28	181.84
29	148.16
30	208.321
31	201.209
32	177.908
33	221.898
34	236.869
35	240.119
36	164.945
37	199.189
38	160.794
39	239.864
40	209.231
41	158.357
42	197.501
43	151
44	199.689
45	184.763
Strain	cdu1 GII pBOMB_Cdu1 I225A_48 hpi
Field	F2
1	167.967
2	192.97
3	158.151
4	173.026
5	176.29
6	162.415
7	161.01
8	162.251
9	213.41
10	247.412
11	207.855
12	238.861
13	218.336
14	178.371
15	191.716
16	196.641
17	187.086
18	180.614
19	194.427
20	165.559
21	259.477
22	154.845
23	175.963
24	228.247
25	206.518
26	197.567
27	202.614
28	151.986
29	226.984
30	148.69
31	181.813
32	188.965
33	173.63
34	196.484
35	161.289
36	170.15
37	172.005
38	150.599
39	149.274
40	156.037
41	165.175
42	180.242
43	112.044
44	247.075
45	195.566
Strain	cdu1 GII pBOMB_Cdu1 I225A_48 hpi
Field	F3
1	254.908
2	183.088
3	197.735
4	114.213
5	186.944
6	173.823
7	131.172
8	221.65
9	297.482
10	271.638
11	205.301
12	257.375
13	181.43
14	168.735
15	191.649
16	239.646
17	188.823
18	185.53
19	224.916
20	234.813
21	233.022
22	209.978
23	226.501
24	231.113
25	221.639
26	199.529
27	183.904
28	231.125
29	155.652
30	225.822
31	202.222
32	209.304
33	206.693
34	158.703
35	157.342
36	187.312
37	172.22
38	192.58
39	180.837
40	199.092
41	160.316
42	181.646
43	209.429
44	150.496
45	145.258
Strain	cdu1 GII pBOMB_Cdu1 I225A_48 hpi
Field	F4
1	278.114
2	286.201
3	137.161
4	152.799
5	180.751
6	171.08
7	200.77
8	170.999
9	186.649
10	155.751
11	238.549
12	176.586
13	256.254
14	186.838
15	207.891
16	158.129
17	220.938
18	271.379
19	225.318
20	186.317
21	184.469
22	209.207
23	204.551
24	164.926
25	183.878
26	216.532
27	193.334
28	166.583
29	197.231
30	189.031
31	197.223
32	179.414
33	197.387
34	182.935
35	155.78
36	214.056
37	183.496
38	177.986
39	152.545
40	217.867
41	240.053
42	183.786
43	177.244
44	160.79
45	162.877
Strain	cdu1 GII pBOMB_Cdu1 I225A_48 hpi
Field	F5
1	144.374
2	122.174
3	161.328
4	157.551
5	162.1
6	116.56
7	174.949
8	240.277
9	142.775
10	212.264
11	211.12
12	195.941
13	156.651
14	219.625
15	243.158
16	204.761
17	222.228
18	267.465
19	161.666
20	175.913
21	200.729
22	275.401
23	191.851
24	197.635
25	186.072
26	190.436
27	229.704
28	141.024
29	173.96
30	225.824
31	205.206
32	151.921
33	165.871
34	227.856
35	200.935
36	192.667
37	238.326
38	191.377
39	192.567
40	176.694
41	149.08
42	284.322
43	160.268
44	169.486
45	182.74

## Sheet: inaC GII
Strain	inaC GII_48 hpi
Field	F1
1	137.904
2	128.979
3	259.425
4	242.602
5	166.474
6	153.774
7	154.414
8	147.017
9	213.107
10	170.404
11	219.634
12	215.563
13	234.267
14	193.582
15	127.173
16	188.739
17	170.202
18	177.054
19	209.246
20	254.467
21	181.032
22	194.46
23	176.427
24	208.286
25	151.786
26	166.355
27	169.339
28	175.22
29	171.114
30	238.353
31	203.194
32	198.704
33	193.225
34	204.603
35	232.3
36	186.789
37	152.057
38	207.684
39	206.164
40	173.759
41	290.261
42	235.361
43	216.445
44	268.309
45	183.593
Strain	inaC GII_48 hpi
Field	F2
1	212.766
2	237.33
3	236.952
4	225.392
5	152.177
6	179.739
7	150.588
8	261.076
9	202.208
10	260.55
11	224.229
12	208.951
13	206.455
14	157.075
15	176.872
16	168.517
17	133.953
18	266.937
19	153.853
20	254.397
21	239.381
22	220.037
23	195.91
24	235.86
25	217.152
26	224.08
27	224.807
28	243.798
29	250.935
30	202.781
31	211.868
32	231.749
33	241.081
34	231.081
35	240.144
36	195.863
37	246.172
38	183.759
39	233.218
40	219.311
41	207.893
42	243.439
43	257.129
44	209.756
45	202.803
Strain	inaC GII_48 hpi
Field	F3
1	179.189
2	200.413
3	177.388
4	231.259
5	252.106
6	144.523
7	242.58
8	158.675
9	141.612
10	212.877
11	200.077
12	202.026
13	204.289
14	261.874
15	158.405
16	159.162
17	212.595
18	214.632
19	193.853
20	241.322
21	173.585
22	150.551
23	221.111
24	216.77
25	180.308
26	237.159
27	212.779
28	266.229
29	163.137
30	186.069
31	218.639
32	176.984
33	220.719
34	174.569
35	205.556
36	170.535
37	195.193
38	204.398
39	214.42
40	197.048
41	236.79
42	205.987
43	264.188
44	198.671
45	188.358
Strain	inaC GII_48 hpi
Field	F4
1	255.098
2	192.078
3	231.531
4	216.281
5	245.466
6	247.184
7	237.283
8	271.009
9	274.792
10	288.764
11	257.433
12	288.351
13	246.573
14	141.884
15	219.105
16	292.642
17	240.062
18	272.471
19	205.565
20	271.913
21	241.096
22	260.142
23	225.361
24	253.298
25	262.01
26	186.382
27	187.543
28	262.164
29	250.154
30	163.989
31	177.392
32	209.305
33	204.021
34	207.716
35	211.482
36	230.364
37	233.795
38	172.369
39	212.493
40	244.774
Strain	inaC GII_48 hpi
Field	F5
1	200.291
2	134.085
3	170.526
4	220.245
5	221.472
6	123.532
7	141.517
8	185.811
9	177.396
10	263.921
11	202.547
12	298.149
13	263.063
14	224.941
15	167.541
16	195.325
17	203.828
18	219.989
19	213.421
20	159.721
21	158.522
22	153.901
23	153.523
24	277.706
25	129.148
26	259.943
27	213.941
28	173.049
29	159.742
30	171.106
31	218.328
32	173.735
33	205.867
34	177.383
35	194.115
36	200.344
37	204.674
38	205.94
39	157.267
40	169.115
41	205.297
42	266.559
43	171.55
44	146.896
45	239.085

## Sheet: ipam GII
Strain	ipam GII_48 hpi
Field	F1
1	229.688
2	169.209
3	206.903
4	232.719
5	273.648
6	156.418
7	187.496
8	259.905
9	172.5
10	210.595
11	162.448
12	195.013
13	171.207
14	165.527
15	296.695
16	199.704
17	230.37
18	257.829
19	158.966
20	264.938
21	193.331
22	220.826
23	220.448
24	197.498
25	155.933
26	180.463
27	224.123
28	189.056
29	237.495
30	252.646
31	197.921
32	207.866
33	224.946
34	176.604
35	196.454
36	217.003
37	238.904
38	181.604
39	197.325
40	151.518
41	188.026
42	218.745
43	301.023
44	153.206
45	153.039
Strain	ipam GII_48 hpi
Field	F2
1	210.755
2	161.848
3	188.148
4	211.966
5	201.598
6	178.369
7	221.497
8	221.918
9	166.68
10	194.82
11	198.477
12	197.028
13	209.358
14	186.764
15	242.368
16	240.585
17	192.615
18	196.654
19	210.746
20	168.116
21	169.845
22	250.845
23	174.189
24	211.858
25	222.549
26	191.779
27	221.882
28	237.08
29	246.075
30	248.691
31	178.095
32	257.862
33	170.128
34	169.939
35	219.604
36	216.828
37	177.467
38	162.923
39	185.531
40	150.888
41	170.084
42	208.453
43	191.326
44	224.657
45	169.268
Strain	ipam GII_48 hpi
Field	F3
1	198.072
2	239.505
3	196.49
4	220.016
5	235.304
6	287.068
7	208.769
8	213.191
9	206.534
10	182.653
11	282.769
12	238.061
13	258.702
14	319.768
15	218.423
16	244.75
17	231.602
18	254.691
19	220.681
20	205.601
21	243.675
22	247.492
23	226.646
24	211.107
25	238.8
26	203.172
27	180.21
28	267.956
29	163.184
30	150.205
31	170.3
32	138.186
33	306.374
34	248.253
35	143.574
36	215.527
37	203.335
38	190.338
39	229.527
40	147.376
41	282.419
42	202.664
43	177.262
44	275.892
45	178.088
Strain	ipam GII_48 hpi
Field	F4
1	123.43
2	225.139
3	232.755
4	217.384
5	199.424
6	176.312
7	188.725
8	187.998
9	170.835
10	208.869
11	262.628
12	252.474
13	214.072
14	187.54
15	189.281
16	254.474
17	174.54
18	222.673
19	166.686
20	195.064
21	193.22
22	282.241
23	209.931
24	257.653
25	246.882
26	142.692
27	222.98
28	222.739
29	235.002
30	206.483
31	230.007
32	230.545
33	236.867
34	175.699
35	218.134
36	241.477
37	216.902
38	235.858
39	167.727
40	151.639
41	215.409
42	256.352
43	202.43
44	184.564
45	260.931
Strain	ipam GII_48 hpi
Field	F5
1	229.523
2	214.23
3	211.361
4	243.071
5	219.915
6	233.973
7	212.451
8	152.512
9	221.51
10	242.997
11	178.042
12	261.37
13	225.451
14	173.215
15	187.645
16	235.43
17	208.075
18	225.211
19	305.154
20	216.663
21	204.874
22	149.289
23	231.804
24	184.025
25	184.452
26	165.468
27	158.45
28	216.877
29	222.71
30	185.854
31	236.368
32	153.453
33	231.532
34	262.973
35	253.919
36	195.672
37	194.919
38	236.92
39	165.158
40	159.312
41	173.541
42	178.886
43	219.808
44	201.151
45	175.232

## Sheet: ctl0480 GII
Strain	ctl048- GII_48 hpi
Field	F1
1	216.394
2	212.067
3	188.408
4	200.345
5	266.759
6	233.651
7	172.877
8	152.403
9	252.958
10	203.345
11	234.851
12	191.218
13	218.427
14	213.646
15	259.129
16	213.74
17	219.127
18	169.317
19	237.043
20	286.487
21	341.147
22	247.069
23	216.481
24	210.228
25	232.846
26	256.119
27	266.721
28	214.994
29	248.871
30	261.997
31	217.705
32	257.902
33	256.734
34	233.477
35	252.655
36	236.71
37	213.29
38	216.973
39	263.81
40	257.497
41	206.04
42	214.375
43	263.821
44	291.705
45	278.186
Strain	ctl048- GII_48 hpi
Field	F2
1	268.172
2	208.568
3	269.189
4	246.368
5	248.93
6	255.768
7	232.689
8	246.482
9	254.321
10	224.331
11	222.828
12	267.33
13	262.278
14	261.5
15	197.343
16	243.372
17	243.664
18	274.913
19	205.344
20	256.637
21	257.208
22	250.673
23	242.287
24	248.174
25	260.474
26	258.27
27	249.421
28	211.562
29	262.351
30	241.863
31	240.365
32	240.408
33	222.331
34	280.527
35	243.749
36	284.72
37	236.108
38	243.669
39	244.774
40	193.756
41	242.644
42	335.753
43	251.842
44	249.22
45	269.822
Strain	ctl048- GII_48 hpi
Field	F3
1	191.778
2	212.712
3	264.605
4	229.915
5	255.786
6	276.022
7	197.685
8	228.66
9	242.424
10	184.791
11	221.607
12	187.321
13	208.594
14	220.409
15	177.518
16	173.03
17	165.26
18	209.074
19	259.991
20	166.416
21	219.57
22	234.86
23	310.97
24	219.966
25	227.355
26	223.154
27	223.47
28	217.513
29	276.372
30	200.181
31	196.104
32	245.013
33	239.544
34	176.919
35	246.202
36	285.369
37	235.158
38	230.819
39	243.15
40	289.372
41	279.352
42	189.38
43	145.554
44	169.212
45	197.157
Strain	ctl048- GII_48 hpi
Field	F4
1	137.066
2	226.904
3	191.548
4	261.153
5	260.806
6	240.793
7	201.854
8	195.657
9	211.606
10	245.79
11	207.223
12	205.436
13	330.269
14	295.814
15	187.229
16	233.34
17	232.19
18	224.221
19	194.59
20	254.892
21	212.276
22	176.241
23	284.253
24	216.09
25	197.862
26	191.981
27	235.042
28	224.955
29	238.274
30	211.421
31	178.069
32	203.843
33	203.59
34	218.568
35	223.577
36	233.412
37	180.866
38	167.37
39	187.207
40	255.082
41	167.369
42	200.621
43	173.542
44	171.508
45	196.96
Strain	ctl048- GII_48 hpi
Field	F5
1	241.484
2	226.015
3	210.098
4	277.356
5	301.187
6	231.534
7	190.449
8	249.378
9	195.845
10	215.249
11	242.163
12	216.232
13	213.507
14	247.572
15	238.646
16	255.872
17	274.949
18	250.794
19	209.069
20	233.224
21	249.946
22	163.645
23	212.657
24	220.135
25	211.501
26	249.412
27	244.442
28	162.459
29	264.754
30	256.488
31	235.021
32	303.209
33	209.939
34	206.152
35	245.77
36	229.888
37	192.301
38	232.266
39	245.718
40	227.718
41	223.589
42	183.916
43	195.993
44	196.474
45	203.016

## Sheet: cdu1 GII_K268E
Strain	cdu1 GII_Cdu1_K268E_48 hpi
Field	F1
1	199.036
2	207.475
3	215.324
4	246.111
5	192.881
6	276.449
7	217.062
8	221.405
9	187.299
10	204.691
11	167.489
12	196.005
13	218.385
14	195.454
15	185.21
16	200.915
17	237.686
18	201.443
19	206.646
20	216.786
21	235.413
22	219.705
23	206.441
24	179.653
25	209.015
26	204.968
27	179.15
28	203.661
29	187.283
30	203.744
31	208.692
32	211.34
33	228.447
34	194.665
35	219.659
36	198.897
37	183.671
38	262.173
39	219.4
40	249.662
41	211.003
42	225.554
43	193.984
44	174.232
45	176.599
Strain	cdu1 GII_Cdu1_K268E_48 hpi
Field	F2
1	214.665
2	186.581
3	166.897
4	235.06
5	211.891
6	213.609
7	203.212
8	237.17
9	191.351
10	239.104
11	184.788
12	216.935
13	184.213
14	194.231
15	182.461
16	231.196
17	226.889
18	206.718
19	203.611
20	214.31
21	215.938
22	231.272
23	190.074
24	214.176
25	253.859
26	185.633
27	172.848
28	213.315
29	201.397
30	170.634
31	198.009
32	220.673
33	234.563
34	229.045
35	233.609
36	212.751
37	207.253
38	210.32
39	196.252
40	278.279
41	200.271
42	198.541
43	165.428
44	194.368
45	189.688
Strain	cdu1 GII_Cdu1_K268E_48 hpi
Field	F3
1	212.423
2	165.658
3	199.241
4	214.864
5	184.688
6	241.741
7	234.214
8	153.609
9	204.271
10	208.996
11	271.281
12	220.661
13	269.513
14	217.005
15	215.081
16	210.722
17	222.254
18	217.475
19	254.448
20	254.438
21	221.211
22	253.696
23	187.504
24	216.245
25	214.397
26	211.94
27	168.892
28	230.099
29	202.566
30	224.649
31	239.913
32	199.327
33	203.137
34	255.365
35	238.907
36	233.395
37	210.127
38	215.541
39	229.487
40	266.2
41	229.668
42	213.716
43	165.07
44	284.521
45	281.021
Strain	cdu1 GII_Cdu1_K268E_48 hpi
Field	F4
1	276.986
2	221.037
3	205.019
4	215.326
5	235.838
6	274.438
7	236.623
8	199.437
9	218.542
10	209.158
11	178.767
12	177.091
13	210.235
14	201.307
15	180.671
16	163.615
17	206.22
18	226.39
19	187.187
20	224.132
21	180.003
22	219.46
23	200.515
24	193.418
25	184.563
26	192.552
27	180.252
28	189.679
29	296.134
30	237.676
31	202.066
32	212.098
33	216.537
34	212.262
35	206.192
36	200.222
37	190.142
38	195.514
39	204.127
40	229.207
41	210.728
42	204.931
43	207.832
44	211.752
45	225.36
Strain	cdu1 GII_Cdu1_K268E_48 hpi
Field	F5
1	219.421
2	186.554
3	167.726
4	185.316
5	251.07
6	241.836
7	186.003
8	201.561
9	197.724
10	229.552
11	196.539
12	185.035
13	216.138
14	203.7
15	195.956
16	211.528
17	206.946
18	179.276
19	208.949
20	192.002
21	193.195
22	193.735
23	190.939
24	204.379
25	221.644
26	188.058
27	235.839
28	189.613
29	176.451
30	271.028
31	195.5
32	180.214
33	242.12
34	191.995
35	187.529
36	193.287
37	175.932
38	175.42
39	178.918
40	173.661
41	163.059
42	176.957
43	176.924
44	193.842
45	175.789
Strain	cdu1 GII_Cdu1_K268E_48 hpi
Field	F6
1	227.093
2	200.96
3	231.865
4	258.297
5	245.941
6	204.585
7	208.799
8	217.792
9	201.426
10	196.573
11	214.961
12	220.744
13	233.118
14	179.268
15	257.667
16	206.892
17	200.203
18	219.806
19	207.135
20	209.672
21	174.677
22	198.316
23	204.511
24	205.15
25	257.7
26	218.41
27	261.992
28	225.25
29	206.216
30	253.057
31	227.109
32	205.817
33	247.274
34	209.427
35	232.646
36	217.33
37	220.081
38	222.327
39	274.1
40	213.502
41	196.873
42	213.034
43	228.465
44	232.088
45	234.141
